# Supplementary material for: Microbiome-wide PheWAS links gut microbial SNVs to human health and exposures
Source: Research Square preprint supplement (doi:10.21203/rs.3.rs-5063726/v1), 2024-09-26
Supplement: Supplementary file 1 [file 6e6f12e9a9b5dbf09332b074.xlsx]

## Sheet: Content
Click to go:
Table S1. Cohorts and datasets overview
Table S2. Summary of phentype data
Table S3. Information of gut microbial species and statistics of SNVs before filtering
Table S4. Information of gut microbial species and statistics of SNVs after filtering
Table S5. The eigenvalues of top-10 and top-20 principal components (PCs) of each species.
Table S6. Genome-wide linkage disequilibrium (LD) levels of 433 gut microbial species in each cohort.
Table S7. Summary of genome-wide linkage disequilibrium (LD) levels of 433 gut microbial species.
Table S8. Concordance of gut microbial genotyping between two DNA isolation kits (FSK and APK).
Table S9. Summary of gut microbial SNP impact on gene product
Table S10. Summary of associations with gut microbial SNPs for all phenotypes
Table S11. SNP-MWAS identified 3,081 robust replicated associations of gut microbial SNPs.
Table S12. SNP-MWAS identified 34,927 robust single-cohort associations between gut microbial SNVs and host factors.
Table S13. Enrichment of high or moderate impact SNVs in replicable associations (Chi-squared test).
Table S14. Enrichment of high or moderate impact SNVs in single-cohort associations (Chi-squared test).
Table S15. Importance of gut microbial SNV features in the final model.
Table S16. Significant associations between gut microbial SNV-predicted age, age and intrinsic host phenotypes.
Table S17. Associations between gut microbial SNV-predicted age, chronological age and blood metabolome.
Table S18. Metabolites showing stronger correlations with gut microbial SNV-predicted age than chronological age.
Table S19. Mediation relationships between exposure factors, gut microbial SNVs and intrinsic host phenotypes.

## Sheet: Table S1_dataset
Table S1. Cohorts and datasets overview
Cohort	Dataset	Description	Country	DNA isolation	Sequencing platform	Individual N	Metagenome N	MWAS	meta-analysis	Population structure	Impact of DNA isolation	Machine learning
DAG3	DAG3	Dutch Microbiome Project	Netherlands	FSK	Illumina HiSeq 2000	7955	7955	Y	Y	Y		Y (as training)
LLD	LLD1	Baseline of the LifeLines-DEEP	Netherlands	APK	Illumina MiSeq	1135	1135	Y	Y	Y		Y (as test)
	LLD2_APK	Follow-up of the LifeLines-DEEP (APK)	Netherlands	APK	Illumina HiSeq 2000		338			Y	Y
	LLD2_FSK	Follow-up of the LifeLines-DEEP (FSK)	Netherlands	FSK	Illumina HiSeq 2000		285			Y	Y	Y (as test)
500FG	500FG_APK	500 Functional Genomics Project (APK)	Netherlands	APK	Illumina HiSeq 2000	529	471			Y	Y
	500FG_FSK	500 Functional Genomics Project (FSK)	Netherlands	FSK	Illumina HiSeq 2000		517	Y	Y	Y	Y	Y (as test)
300OB	300OB	300-Obesity	Netherlands	APK	Illumina HiSeq 2000	298	298	Y	Y	Y
IBD	IBD	1000 Inflammatory Bowel Disease Project	Netherlands	APK	Illumina HiSeq	544	544	Y	Y	Y
300TZFG	300TZFG	300 Tanzania Functional Genomics Project	Tanzania	APK	Illumina NovaSeq 6000	320	320	Y	Y	Y

## Sheet: Table S2_pheno
Table S2. Summary of phentype data.
SuperClass	Class	SubClass	UnifiedName	ValueType	AvailableCohort	AvailableCohortNumber	Total_N	N_DMP	N_LLD1	N_LLD2_APK	N_LLD2_FSK	N_500FG_APK	N_500FG_FSK	N_300OB	N_IBD	N_300TZFG	N_All	Percentage_DMP	Percentage_LLD1	Percentage_LLD2_APK	Percentage_LLD2_FSK	Percentage_500FG_APK	Percentage_500FG_FSK	Percentage_300OB	Percentage_IBD	Percentage_300TZFG	Percentage_All	Num	Mean.or.N_1	SE.or.Percent_1	Num.DMP	Mean.or.N_1.DMP	SE.or.Percent_1.DMP	Num.LLD1	Mean.or.N_1.LLD1	SE.or.Percent_1.LLD1	Num.LLD2_APK	Mean.or.N_1.LLD2_APK	SE.or.Percent_1.LLD2_APK	Num.LLD2_FSK	Mean.or.N_1.LLD2_FSK	SE.or.Percent_1.LLD2_FSK	Num.500FG_APK	Mean.or.N_1.500FG_APK	SE.or.Percent_1.500FG_APK	Num.500FG_FSK	Mean.or.N_1.500FG_FSK	SE.or.Percent_1.500FG_FSK	Num.300OB
Intrinsic	Anthropology	Anthropology	Age	Continuous	dmp;lld1;300ob;500fg;ibd;lld2;300tzfg	7	11694	7955	1135	338	253	465	510	298	424	316	11694	1	1	1	1	0.987261	0.98646	1	0.779412	0.9875	0.98842	11694	46.3113	0.146106	7955	48.3243	0.16666	1135	45.0358	0.403769	338	51.696	0.634163	253	50.3676	0.730121	465	27.4946	0.57825	510	28.4667	0.60607	298
Intrinsic	Anthropology	Anthropology	BMI	Continuous	dmp;lld1;300ob;500fg;ibd;lld2;300tzfg	7	11673	7955	1135	338	253	457	501	298	420	316	11673	1	1	1	1	0.970276	0.969052	1	0.772059	0.9875	0.986645	11673	25.4093	0.041047	7955	25.5564	0.0495487	1135	25.2579	0.123935	338	25.6145	0.218368	253	25.5597	0.250732	457	22.7016	0.128002	501	22.7526	0.127384	298
Intrinsic	Anthropology	Anthropology	Height	Continuous	dmp;lld1;300ob;500fg;lld2;300tzfg	6	11258	7949	1135	338	253	462	507	298	0	316	11258	0.999246	1	1	1	0.980892	0.980658	1	0	0.9875	0.951568	11258	173.832	0.0966423	7949	173.775	0.118006	1135	175.001	0.276467	338	175.064	0.486731	253	175.158	0.555439	462	176.013	0.420837	507	175.787	0.402295	298
Intrinsic	Anthropology	Anthropology	Weight	Continuous	dmp;lld1;300ob;500fg;300tzfg	5	11164	7949	1133	251	253	460	504	298	0	316	11164	0.999246	0.998238	0.742604	1	0.976645	0.974855	1	0	0.9875	0.943623	11164	77.1402	0.152111	7949	77.6775	0.185486	1133	77.4426	0.430664	251	78.6295	0.905323	253	78.6087	0.898342	460	70.6543	0.55919	504	70.6071	0.533134	298
Intrinsic	Anthropology	Anthropology	HipCircumference	Continuous	dmp;lld1;300ob;lld2	4	9973	7949	1135	338	253	0	0	298	0	0	9973	0.999246	1	1	1	0	0	1	0	0	0.842955	9973	98.9004	0.103734	7949	98.7717	0.114994	1135	95.9885	0.30047	338	99.9586	0.468982	253	99.8142	0.53955	0	NA	NA	0	NA	NA	298
Intrinsic	Anthropology	Anthropology	WaistCircumference	Continuous	dmp;lld1;300ob	3	9884	7949	1133	251	253	0	0	298	0	0	9884	0.999246	0.998238	0.742604	1	0	0	1	0	0	0.835432	9884	89.1203	0.132987	7949	88.5154	0.146339	1133	88.5719	0.368461	251	89.6394	0.793601	253	89.6581	0.789415	0	NA	NA	0	NA	NA	298
Intrinsic	Anthropology	Anthropology	WHR	Continuous	dmp;lld1;300ob;lld2	4	9973	7949	1135	338	253	0	0	298	0	0	9973	0.999246	1	1	1	0	0	1	0	0	0.842955	9973	0.900528	0.000875595	7949	0.895558	0.000985356	1135	0.922378	0.0023154	338	0.897383	0.00480169	253	0.897093	0.00558954	0	NA	NA	0	NA	NA	298
Intrinsic	Anthropology	Anthropology	DeltaBMI	Continuous	dmp	1	8307	7803	0	251	253	0	0	0	0	0	8307	0.980893	0	0.742604	1	0	0	0	0	0	0.702138	8307	0.214169	0.0191343	7803	0.211188	0.0199048	0	NA	NA	251	0.261753	0.0951336	253	0.258893	0.0947267	0	NA	NA	0	NA	NA	0
Intrinsic	Anthropology	Anthropology	Sex	Binary	dmp;lld1;300ob;500fg;ibd;lld2;300tzfg	7	11706	7955	1135	338	253	471	516	298	424	316	11706	1	1	1	1	1	0.998066	1	0.779412	0.9875	0.989435	11706	4964	42.4056	7955	3337	41.9485	1135	474	41.7621	338	150	44.3787	253	114	45.0593	471	204	43.3121	516	228	44.1006	298
Exposure	GeographySocioeconomics	Geography	Latitude	Location	dmp	1	8446	7942	0	251	253	0	0	0	0	0	8446	0.998366	0	0.742604	1	0	0	0	0	0	0.713887	NA	NA	NA	NA	NA	NA	NA	NA	NA	NA	NA	NA	NA	NA	NA	NA	NA	NA	NA	NA	NA	NA
Exposure	GeographySocioeconomics	Geography	Longitude	Location	dmp	1	8446	7942	0	251	253	0	0	0	0	0	8446	0.998366	0	0.742604	1	0	0	0	0	0	0.713887	NA	NA	NA	NA	NA	NA	NA	NA	NA	NA	NA	NA	NA	NA	NA	NA	NA	NA	NA	NA	NA	NA
Exposure	EarlyLifeExposure	Birth	BirthIt	Continuous	dmp	1	2678	2526	0	76	76	0	0	0	0	0	2678	0.317536	0	0.224852	0.300395	0	0	0	0	0	0.226354	2678	50.481	0.0494784	2526	50.4616	0.0510556	0	NA	NA	76	50.8026	0.282234	76	50.8026	0.282234	0	NA	NA	0	NA	NA	0
Exposure	EarlyLifeExposure	Birth	BirthMode	Binary	dmp	1	7561	7079	0	240	242	0	0	0	0	0	7561	0.889881	0	0.710059	0.956522	0	0	0	0	0	0.639084	7561	182	2.40709	7079	173	2.17473	0	0	0	240	4	1.18343	242	5	1.97628	0	0	0	0	0	0	0
Exposure	EarlyLifeExposure	Birth	BirthWeight	Continuous	dmp	1	5014	4664	0	174	176	0	0	0	0	0	5014	0.586298	0	0.514793	0.695652	0	0	0	0	0	0.423802	5014	3438.87	9.58676	4664	3437.81	10.0899	0	NA	NA	174	3451.04	39.8485	176	3454.84	39.5133	0	NA	NA	0	NA	NA	0
Exposure	EarlyLifeExposure	EarlyLifeDiet	Breastfed0to4W	Binary	dmp	1	4586	4284	0	150	152	0	0	0	0	0	4586	0.538529	0	0.443787	0.600791	0	0	0	0	0	0.387626	4586	654	14.2608	4284	593	7.45443	0	0	0	150	30	8.87574	152	31	12.253	0	0	0	0	0	0	0
Exposure	EarlyLifeExposure	EarlyLifeDiet	Breastfed1to3M	Binary	dmp	1	4586	4284	0	150	152	0	0	0	0	0	4586	0.538529	0	0.443787	0.600791	0	0	0	0	0	0.387626	4586	680	14.8277	4284	637	8.00754	0	0	0	150	21	6.21302	152	22	8.69565	0	0	0	0	0	0	0
Exposure	EarlyLifeExposure	EarlyLifeDiet	Breastfed3to6M	Binary	dmp	1	4586	4284	0	150	152	0	0	0	0	0	4586	0.538529	0	0.443787	0.600791	0	0	0	0	0	0.387626	4586	806	17.5752	4284	768	9.65431	0	0	0	150	19	5.6213	152	19	7.50988	0	0	0	0	0	0	0
Exposure	EarlyLifeExposure	EarlyLifeDiet	BreastfedAfter6M	Binary	dmp	1	4586	4284	0	150	152	0	0	0	0	0	4586	0.538529	0	0.443787	0.600791	0	0	0	0	0	0.387626	4586	955	20.8242	4284	891	11.2005	0	0	0	150	32	9.46746	152	32	12.6482	0	0	0	0	0	0	0
Exposure	EarlyLifeExposure	EarlyLifePregnant	PregMotherSmoking	Order	dmp;lld1	2	7592	6242	930	209	211	0	0	0	0	0	7592	0.784664	0.819383	0.618343	0.833992	0	0	0	0	0	0.641704	7592	0.222998	0.00627529	6242	0.219321	0.00689263	930	0.234409	0.0180953	209	0.253589	0.0394221	211	0.251185	0.0390843	0	NA	NA	0	NA	NA	0
Exposure	EarlyLifeExposure	Birth	PretermBorn	Binary	dmp	1	5851	5469	0	190	192	0	0	0	0	0	5851	0.687492	0	0.56213	0.758893	0	0	0	0	0	0.494548	5851	230	3.93095	5469	224	2.81584	0	0	0	190	3	0.887574	192	3	1.18577	0	0	0	0	0	0	0
Exposure	Diet	Diet	GlycemicLoad	Continuous	dmp	1	7328	6860	0	233	235	0	0	0	0	0	7328	0.862351	0	0.689349	0.928854	0	0	0	0	0	0.61939	7328	129.316	0.498365	6860	129.79	0.519466	0	NA	NA	233	122.318	2.37556	235	122.434	2.37185	0	NA	NA	0	NA	NA	0
Exposure	Diet	Diet	DailyCalorieIntake	Continuous	dmp;lld1	2	8433	6860	1105	233	235	0	0	0	0	0	8433	0.862351	0.973568	0.689349	0.928854	0	0	0	0	0	0.712788	8433	2033.99	6.51976	6860	2052.45	7.28702	1105	1941.6	18.0837	233	1981.47	32.1077	235	1981.66	32.0011	0	NA	NA	0	NA	NA	0
Exposure	Diet	Diet	DailyAlcoholIntake	Continuous	dmp	1	7327	6859	0	233	235	0	0	0	0	0	7327	0.862225	0	0.689349	0.928854	0	0	0	0	0	0.619305	7327	0.0256682	0.000354473	6859	0.0254073	0.000368458	0	NA	NA	233	0.0295186	0.00180048	235	0.0294649	0.00178925	0	NA	NA	0	NA	NA	0
Exposure	Diet	Diet	DailyCarbonhydrateIntake	Continuous	dmp	1	7327	6859	0	233	235	0	0	0	0	0	7327	0.862225	0	0.689349	0.928854	0	0	0	0	0	0.619305	7327	0.444732	0.000661737	6859	0.445097	0.00068347	0	NA	NA	233	0.439257	0.00374322	235	0.439509	0.00371779	0	NA	NA	0	NA	NA	0
Exposure	Diet	Diet	DailyFructoseIntake	Continuous	dmp	1	7327	6859	0	233	235	0	0	0	0	0	7327	0.862225	0	0.689349	0.928854	0	0	0	0	0	0.619305	7327	0.0290094	0.000155615	6859	0.0289901	0.000161406	0	NA	NA	233	0.0292816	0.000828923	235	0.0293045	0.00082269	0	NA	NA	0	NA	NA	0
Exposure	Diet	Diet	DailyGlucoseIntake	Continuous	dmp	1	7327	6859	0	233	235	0	0	0	0	0	7327	0.862225	0	0.689349	0.928854	0	0	0	0	0	0.619305	7327	0.0232176	0.000108527	6859	0.0232147	0.000112504	0	NA	NA	233	0.0232586	0.000583715	235	0.0232623	0.000578841	0	NA	NA	0	NA	NA	0
Exposure	Diet	Diet	DailyLactoseIntake	Continuous	dmp	1	7327	6859	0	233	235	0	0	0	0	0	7327	0.862225	0	0.689349	0.928854	0	0	0	0	0	0.619305	7327	0.0276459	0.000194628	6859	0.0277454	0.000202014	0	NA	NA	233	0.0262288	0.00101965	235	0.0261446	0.00101274	0	NA	NA	0	NA	NA	0
Exposure	Diet	Diet	DailyMaltoseIntake	Continuous	dmp	1	7327	6859	0	233	235	0	0	0	0	0	7327	0.862225	0	0.689349	0.928854	0	0	0	0	0	0.619305	7327	0.0070763	2.5849e-05	6859	0.00707273	2.6696e-05	0	NA	NA	233	0.00712784	0.000147129	235	0.00712965	0.000145902	0	NA	NA	0	NA	NA	0
Exposure	Diet	Diet	DailyPolysaccharidesIntake	Continuous	dmp	1	7327	6859	0	233	235	0	0	0	0	0	7327	0.862225	0	0.689349	0.928854	0	0	0	0	0	0.619305	7327	0.255208	0.000490927	6859	0.255146	0.000508795	0	NA	NA	233	0.255974	0.00264421	235	0.25626	0.00263339	0	NA	NA	0	NA	NA	0
Exposure	Diet	Diet	DailySuchroseIntake	Continuous	dmp	1	7327	6859	0	233	235	0	0	0	0	0	7327	0.862225	0	0.689349	0.928854	0	0	0	0	0	0.619305	7327	0.0907736	0.000427574	6859	0.0911452	0.00044429	0	NA	NA	233	0.0853151	0.00217881	235	0.0853399	0.00216057	0	NA	NA	0	NA	NA	0
Exposure	Diet	Diet	DailyFatIntake	Continuous	dmp	1	7327	6859	0	233	235	0	0	0	0	0	7327	0.862225	0	0.689349	0.928854	0	0	0	0	0	0.619305	7327	0.354711	0.000575567	6859	0.354722	0.000594457	0	NA	NA	233	0.354624	0.00327028	235	0.354484	0.00325171	0	NA	NA	0	NA	NA	0
Exposure	Diet	Diet	DailyProteinIntake	Continuous	dmp	1	7327	6859	0	233	235	0	0	0	0	0	7327	0.862225	0	0.689349	0.928854	0	0	0	0	0	0.619305	7327	0.150555	0.000283402	6859	0.150458	0.000293806	0	NA	NA	233	0.15201	0.00151926	235	0.151935	0.00150739	0	NA	NA	0	NA	NA	0
Exposure	Diet	Diet	DailyAnimalProteinIntake	Continuous	dmp	1	7327	6859	0	233	235	0	0	0	0	0	7327	0.862225	0	0.689349	0.928854	0	0	0	0	0	0.619305	7327	0.0891713	0.000302466	6859	0.0891453	0.000312323	0	NA	NA	233	0.0896116	0.00172446	235	0.0894924	0.00171342	0	NA	NA	0	NA	NA	0
Exposure	Diet	Diet	DailyPlantProteinIntake	Continuous	dmp	1	7327	6859	0	233	235	0	0	0	0	0	7327	0.862225	0	0.689349	0.928854	0	0	0	0	0	0.619305	7327	0.0616299	0.00013155	6859	0.0615583	0.000136166	0	NA	NA	233	0.0626581	0.000719763	235	0.0627017	0.000716185	0	NA	NA	0	NA	NA	0
Exposure	Diet	Diet	ProbioticsFreq	Order	dmp	1	1789	1685	0	52	52	0	0	0	0	0	1789	0.211816	0	0.153846	0.205534	0	0	0	0	0	0.151213	1789	0.816098	0.0252939	1685	0.803561	0.0259308	0	NA	NA	52	1.01923	0.158924	52	1.01923	0.158924	0	NA	NA	0	NA	NA	0
Exposure	Diet	Diet	RatiosCarbToFat	Continuous	dmp	1	7327	6859	0	233	235	0	0	0	0	0	7327	0.862225	0	0.689349	0.928854	0	0	0	0	0	0.619305	7327	1.29678	0.003953	6859	1.29761	0.00407989	0	NA	NA	233	1.28405	0.0226753	235	1.28513	0.0225337	0	NA	NA	0	NA	NA	0
Exposure	Diet	Diet	RatiosCarbToProtein	Continuous	dmp	1	7327	6859	0	233	235	0	0	0	0	0	7327	0.862225	0	0.689349	0.928854	0	0	0	0	0	0.619305	7327	3.04288	0.00804299	6859	3.04769	0.0083357	0	NA	NA	233	2.97113	0.0431349	235	2.97377	0.0428302	0	NA	NA	0	NA	NA	0
Exposure	Diet	Diet	LifelinesDietScore	Continuous	dmp	1	7725	7233	0	245	247	0	0	0	0	0	7725	0.909239	0	0.724852	0.976285	0	0	0	0	0	0.652946	7725	24.7622	0.0664274	7233	24.7167	0.0684862	0	NA	NA	245	25.4204	0.38467	247	25.4413	0.381876	0	NA	NA	0	NA	NA	0
Exposure	Diet	Diet	LifelinesProteinDietScore	Continuous	dmp;ibd	2	7751	6859	0	233	235	0	0	0	424	0	7751	0.862225	0	0.689349	0.928854	0	0	0	0.779412	0	0.655143	7751	9.99045	0.0315914	6859	9.98615	0.0333672	0	NA	NA	233	10.3219	0.184539	235	10.3277	0.183407	0	NA	NA	0	NA	NA	0
Exposure	Diet	Diet	LowCarbonhydrateDietScore	Continuous	dmp	1	7327	6859	0	233	235	0	0	0	0	0	7327	0.862225	0	0.689349	0.928854	0	0	0	0	0	0.619305	7327	15.0124	0.0826533	6859	14.9685	0.085113	0	NA	NA	233	15.6738	0.486977	235	15.6383	0.484611	0	NA	NA	0	NA	NA	0
Exposure	Diet	Diet	PlantProteinDietScore	Continuous	dmp	1	7327	6859	0	233	235	0	0	0	0	0	7327	0.862225	0	0.689349	0.928854	0	0	0	0	0	0.619305	7327	5.00764	0.0370143	6859	4.99825	0.0380915	0	NA	NA	233	5.13734	0.220474	235	5.15319	0.219626	0	NA	NA	0	NA	NA	0
Exposure	Diet	Diet	AlcoholFreqPerMonth	Order	dmp;lld1	2	7628	6097	1101	214	216	0	0	0	0	0	7628	0.766436	0.970044	0.633136	0.853755	0	0	0	0	0	0.644747	7628	4.14788	0.0215384	6097	4.08316	0.0242023	1101	4.41326	0.0551753	214	4.38318	0.123974	216	4.38889	0.123065	0	NA	NA	0	NA	NA	0
Exposure	Diet	Diet	AlcoholGlassPerDay	Continuous	dmp;lld1	2	6518	5165	967	192	194	0	0	0	0	0	6518	0.649277	0.851982	0.568047	0.766798	0	0	0	0	0	0.550926	6518	2.39414	0.0189479	5165	2.35024	0.0209115	967	2.67322	0.0556484	192	2.28646	0.0906343	194	2.27835	0.0899538	0	NA	NA	0	NA	NA	0
Exposure	Diet	Diet	BreakfastFreqPerMonth	Order	dmp;lld1	2	8156	6587	1101	233	235	0	0	0	0	0	8156	0.828033	0.970044	0.689349	0.928854	0	0	0	0	0	0.689375	8156	6.71959	0.0104229	6587	6.73569	0.0113401	1101	6.62943	0.0309859	233	6.70386	0.0661538	235	6.70638	0.0656137	0	NA	NA	0	NA	NA	0
Exposure	Diet	Diet	OnDietPastMonth	Order	dmp;lld1	2	8151	6585	1100	232	234	0	0	0	0	0	8151	0.827781	0.969163	0.686391	0.924901	0	0	0	0	0	0.688953	8151	2.828	0.00544405	6585	2.82779	0.00609896	1100	2.82364	0.014489	232	2.84052	0.0308785	234	2.84188	0.0306292	0	NA	NA	0	NA	NA	0
Exposure	Diet	Diet	EnergyRestrictedDiet	Binary	dmp;lld1	2	9592	7955	1133	251	253	0	0	0	0	0	9592	1	0.998238	0.742604	1	0	0	0	0	0	0.810751	9592	365	3.80525	7955	309	3.88435	1133	46	4.05286	251	5	1.47929	253	5	1.97628	0	0	0	0	0	0	0
Exposure	Diet	Diet	SodiumRestrictedDiet	Binary	dmp;lld1	2	9592	7955	1133	251	253	0	0	0	0	0	9592	1	0.998238	0.742604	1	0	0	0	0	0	0.810751	9592	37	0.385738	7955	28	0.35198	1133	7	0.61674	251	1	0.295858	253	1	0.395257	0	0	0	0	0	0	0
Exposure	Diet	Diet	FatRestrictedDiet	Binary	dmp;lld1	2	9592	7955	1133	251	253	0	0	0	0	0	9592	1	0.998238	0.742604	1	0	0	0	0	0	0.810751	9592	127	1.32402	7955	98	1.23193	1133	25	2.20264	251	2	0.591716	253	2	0.790514	0	0	0	0	0	0	0
Exposure	Diet	Diet	DiabetesDiet	Binary	dmp;lld1	2	9592	7955	1133	251	253	0	0	0	0	0	9592	1	0.998238	0.742604	1	0	0	0	0	0	0.810751	9592	43	0.44829	7955	34	0.427404	1133	5	0.440529	251	2	0.591716	253	2	0.790514	0	0	0	0	0	0	0
Exposure	Diet	Diet	HighCholesterolDiet	Binary	dmp;lld1	2	9592	7955	1133	251	253	0	0	0	0	0	9592	1	0.998238	0.742604	1	0	0	0	0	0	0.810751	9592	60	0.625521	7955	54	0.678818	1133	4	0.352423	251	1	0.295858	253	1	0.395257	0	0	0	0	0	0	0
Exposure	Diet	Diet	HighFibreDiet	Binary	dmp;lld1	2	9592	7955	1133	251	253	0	0	0	0	0	9592	1	0.998238	0.742604	1	0	0	0	0	0	0.810751	9592	56	0.58382	7955	35	0.439975	1133	15	1.32159	251	3	0.887574	253	3	1.18577	0	0	0	0	0	0	0
Exposure	CurrentExposure	GreenSpace	GreenSpace	Continuous	dmp	1	8439	7935	0	251	253	0	0	0	0	0	8439	0.997486	0	0.742604	1	0	0	0	0	0	0.713296	8439	0.189135	0.00310311	7935	0.191309	0.00318581	0	NA	NA	251	0.15463	0.0191461	253	0.155179	0.0190293	0	NA	NA	0	NA	NA	0
Exposure	EarlyLifeExposure	EarlyLifeLiving	UrbanicityChild1to4Y	Order	dmp	1	7785	7289	0	247	249	0	0	0	0	0	7785	0.916279	0	0.730769	0.98419	0	0	0	0	0	0.658017	7785	NA	NA	7289	NA	NA	0	NA	NA	247	NA	NA	249	NA	NA	0	NA	NA	0	NA	NA	0
Exposure	CurrentExposure	Pets	PetsNowAny	Binary	dmp;300tzfg	2	8775	7955	0	251	253	0	0	0	0	316	8775	1	0	0.742604	1	0	0	0	0	0.9875	0.741696	8775	3824	43.5783	7955	3558	44.7266	0	0	0	251	111	32.8402	253	112	44.2688	0	0	0	0	0	0	0
Exposure	CurrentExposure	Pets	PetsNowCat	Binary	dmp	1	8459	7955	0	251	253	0	0	0	0	0	8459	1	0	0.742604	1	0	0	0	0	0	0.714986	8459	2520	29.7908	7955	2360	29.6669	0	0	0	251	80	23.6686	253	80	31.6206	0	0	0	0	0	0	0
Exposure	CurrentExposure	Pets	PetsNowDog	Binary	dmp	1	8459	7955	0	251	253	0	0	0	0	0	8459	1	0	0.742604	1	0	0	0	0	0	0.714986	8459	2034	24.0454	7955	1937	24.3495	0	0	0	251	48	14.2012	253	49	19.3676	0	0	0	0	0	0	0
Exposure	CurrentExposure	Pollution	NO2	Continuous	dmp	1	8440	7936	0	251	253	0	0	0	0	0	8440	0.997612	0	0.742604	1	0	0	0	0	0	0.71338	8440	15.9492	0.0401115	7936	15.8769	0.0404914	0	NA	NA	251	17.0837	0.291182	253	17.0941	0.289234	0	NA	NA	0	NA	NA	0
Exposure	CurrentExposure	Pollution	PM2.5	Continuous	dmp	1	8442	7938	0	251	253	0	0	0	0	0	8442	0.997863	0	0.742604	1	0	0	0	0	0	0.713549	8442	15.5165	0.00343324	7938	15.5094	0.00353378	0	NA	NA	251	15.6288	0.0192326	253	15.6283	0.0190879	0	NA	NA	0	NA	NA	0
Exposure	EarlyLifeExposure	EarlyLifePets	ParentSmokerChildhood	Binary	dmp	1	8459	7955	0	251	253	0	0	0	0	0	8459	1	0	0.742604	1	0	0	0	0	0	0.714986	8459	6150	72.7036	7955	5779	72.6461	0	0	0	251	185	54.7337	253	186	73.5178	0	0	0	0	0	0	0
Exposure	CurrentExposure	Smoking	SmokingPassive	Binary	dmp	1	7681	7189	0	245	247	0	0	0	0	0	7681	0.903708	0	0.724852	0.976285	0	0	0	0	0	0.649227	7681	1725	22.458	7189	1621	20.3771	0	0	0	245	52	15.3846	247	52	20.5534	0	0	0	0	0	0	0
Exposure	CurrentExposure	Smoking	CurrentSmoker	Binary	dmp;lld1;500fg;ibd;lld2	5	11056	7955	1124	338	253	462	507	0	417	0	11056	1	0.990308	1	1	0.980892	0.980658	0	0.766544	0	0.934494	11056	1273	11.5141	7955	766	9.62916	1124	218	19.207	338	40	11.8343	253	33	13.0435	462	60	12.7389	507	69	13.3462	0
Exposure	CurrentExposure	Smoking	SmokerOneYearEver	Binary	dmp	1	8459	7955	0	251	253	0	0	0	0	0	8459	1	0	0.742604	1	0	0	0	0	0	0.714986	8459	2933	34.6731	7955	2740	34.4437	0	0	0	251	96	28.4024	253	97	38.3399	0	0	0	0	0	0	0
Exposure	CurrentExposure	Smoking	SmokerStopped	Binary	dmp	1	8459	7955	0	251	253	0	0	0	0	0	8459	1	0	0.742604	1	0	0	0	0	0	0.714986	8459	3091	36.541	7955	2892	36.3545	0	0	0	251	99	29.2899	253	100	39.5257	0	0	0	0	0	0	0
Exposure	CurrentExposure	Smoking	CigarettesPerDay	Continuous	dmp;lld1;500fg	3	1147	743	205	33	33	61	72	0	0	0	1147	0.0934004	0.180617	0.0976331	0.130435	0.129512	0.139265	0	0	0	0.0969487	1147	8.55711	0.200169	743	8.72948	0.251703	205	9.13171	0.470951	33	6.43939	1.09919	33	6.43939	1.09919	61	7.45902	0.787392	72	8.01389	0.786599	0
Exposure	CurrentExposure	Smoking	SmokingDuration	Continuous	dmp;lld1;500fg	3	4007	3100	551	106	107	66	77	0	0	0	4007	0.389692	0.485463	0.313609	0.422925	0.140127	0.148936	0	0	0	0.338687	4007	19.4927	0.195388	3100	20.0068	0.223646	551	18.1434	0.485349	106	20.2222	1.01593	107	20.1079	1.01285	66	11.3182	1.61435	77	13.5974	1.73415	0
Intrinsic	MedicalMeasurement	BloodCell	Basophils	Continuous	dmp;lld1;300ob;lld2	4	9745	7764	1114	330	247	0	0	290	0	0	9745	0.97599	0.981498	0.976331	0.976285	0	0	0.973154	0	0	0.823684	9745	0.0443622	0.000220058	7764	0.0466525	0.000244501	1114	0.0308618	0.000532497	330	0.0449394	0.00120348	247	0.0460324	0.00143723	0	NA	NA	0	NA	NA	290
Intrinsic	MedicalMeasurement	BloodChem	BloodCreatinine	Continuous	dmp;lld1;300ob;lld2	4	9815	7811	1130	331	247	0	0	296	0	0	9815	0.981898	0.995595	0.97929	0.976285	0	0	0.993289	0	0	0.8296	9815	79.7236	0.148137	7811	80.439	0.166788	1130	73.0743	0.373493	331	82.287	0.758882	247	83.2429	0.842853	0	NA	NA	0	NA	NA	296
Intrinsic	MedicalMeasurement	HeartVascular	DBP	Continuous	dmp;lld1;300ob;lld2	4	9968	7945	1134	338	253	0	0	298	0	0	9968	0.998743	0.999119	1	1	0	0	1	0	0	0.842532	9968	72.99	0.0989445	7945	73.0842	0.110951	1134	70.7566	0.270287	338	72.5444	0.542375	253	72.3478	0.615093	0	NA	NA	0	NA	NA	298
Intrinsic	MedicalMeasurement	HeartVascular	SBP	Continuous	dmp;lld1;300ob;lld2	4	9968	7945	1134	338	253	0	0	298	0	0	9968	0.998743	0.999119	1	1	0	0	1	0	0	0.842532	9968	126.069	0.160349	7945	126.898	0.181867	1134	118.992	0.394364	338	126.746	0.86472	253	126.569	0.957583	0	NA	NA	0	NA	NA	298
Intrinsic	MedicalMeasurement	Inflammation	hsCRP	Continuous	dmp;300ob;lld1	3	1723	72	1053	150	150	0	0	298	0	0	1723	0.00905091	0.927753	0.443787	0.592885	0	0	1	0	0	0.145634	1723	2.59918	0.0773336	72	2.4	0.444	1053	2.71092	0.102718	150	1.942	0.205831	150	1.942	0.205831	0	NA	NA	0	NA	NA	298
Intrinsic	MedicalMeasurement	BloodCell	Eosinophils	Continuous	dmp;lld1;300ob;lld2	4	9745	7764	1114	330	247	0	0	290	0	0	9745	0.97599	0.981498	0.976331	0.976285	0	0	0.973154	0	0	0.823684	9745	0.195906	0.0014753	7764	0.198684	0.00168406	1114	0.188133	0.00399217	330	0.179152	0.00662928	247	0.182348	0.0079871	0	NA	NA	0	NA	NA	290
Intrinsic	MedicalMeasurement	BloodCell	Erythrocytes	Continuous	dmp;lld1;lld2	3	9504	7797	1129	331	247	0	0	0	0	0	9504	0.980138	0.994714	0.97929	0.976285	0	0	0	0	0	0.803313	9504	4.75784	0.00428783	7797	4.77395	0.00473325	1129	4.65985	0.0118904	331	4.7306	0.0236585	247	4.73364	0.0269873	0	NA	NA	0	NA	NA	0
Intrinsic	MedicalMeasurement	BloodChem	Glucose	Continuous	dmp;lld1;300ob;lld2	4	9719	7726	1121	329	246	0	0	297	0	0	9719	0.971213	0.987665	0.973373	0.972332	0	0	0.996644	0	0	0.821486	9719	5.02687	0.00822456	7726	5.01153	0.00916967	1121	4.95834	0.020489	329	5.00973	0.0344337	246	5.02317	0.0423387	0	NA	NA	0	NA	NA	297
Intrinsic	MedicalMeasurement	BloodCell	Neutrophils	Continuous	dmp;300ob	2	8547	7764	0	246	247	0	0	290	0	0	8547	0.97599	0	0.727811	0.976285	0	0	0.973154	0	0	0.722424	8547	3.21464	0.0126329	7764	3.21283	0.0133657	0	NA	NA	246	3.17911	0.0686303	247	3.17676	0.068392	0	NA	NA	0	NA	NA	290
Intrinsic	MedicalMeasurement	BloodChem	Hemoglobin	Continuous	dmp;lld1;300ob;lld2	4	9799	7797	1129	331	247	0	0	295	0	0	9799	0.980138	0.994714	0.97929	0.976285	0	0	0.989933	0	0	0.828248	9799	8.79306	0.00791306	7797	8.80564	0.00887785	1129	8.67272	0.0236606	331	8.74653	0.0415642	247	8.73684	0.0478934	0	NA	NA	0	NA	NA	295
Intrinsic	MedicalMeasurement	BloodChem	HbA1c	Continuous	dmp;lld1;300ob;lld2	4	9801	7798	1129	331	247	0	0	296	0	0	9801	0.980264	0.994714	0.97929	0.976285	0	0	0.993289	0	0	0.828417	9801	36.5244	0.0494554	7798	36.3491	0.0540472	1129	36.6404	0.127202	331	36.0755	0.232747	247	36.0526	0.273235	0	NA	NA	0	NA	NA	296
Intrinsic	MedicalMeasurement	HeartVascular	HeartRate	Continuous	dmp;lld1;300ob	3	9878	7945	1134	251	253	0	0	295	0	0	9878	0.998743	0.999119	0.742604	1	0	0	0.989933	0	0	0.834925	9878	68.7281	0.110834	7945	68.6435	0.124112	1134	70.8298	0.302035	251	68.9641	0.713564	253	68.8972	0.712931	0	NA	NA	0	NA	NA	295
Intrinsic	MedicalMeasurement	BloodChem	HDL	Continuous	dmp;lld1;300ob;lld2	4	9815	7811	1130	331	247	0	0	296	0	0	9815	0.981898	0.995595	0.97929	0.976285	0	0	0.993289	0	0	0.8296	9815	1.50818	0.00419685	7811	1.50676	0.00467473	1130	1.54137	0.0123746	331	1.56314	0.0256545	247	1.54049	0.0300574	0	NA	NA	0	NA	NA	296
Intrinsic	MedicalMeasurement	BloodCell	HCT	Continuous	dmp;300ob	2	8585	7797	0	246	247	0	0	295	0	0	8585	0.980138	0	0.727811	0.976285	0	0	0.989933	0	0	0.725636	8585	0.430528	0.000369171	7797	0.430792	0.000388545	0	NA	NA	246	0.429427	0.00209479	247	0.429547	0.00208973	0	NA	NA	0	NA	NA	295
Intrinsic	MedicalMeasurement	BloodChem	Potassium	Continuous	dmp	1	8304	7811	0	246	247	0	0	0	0	0	8304	0.981898	0	0.727811	0.976285	0	0	0	0	0	0.701885	8304	4.04692	0.00329057	7811	4.04471	0.00340304	0	NA	NA	246	4.08211	0.0180891	247	4.08178	0.0180188	0	NA	NA	0	NA	NA	0
Intrinsic	MedicalMeasurement	BloodChem	LDL	Continuous	dmp;lld1;300ob;lld2	4	9810	7811	1130	331	247	0	0	291	0	0	9810	0.981898	0.995595	0.97929	0.976285	0	0	0.97651	0	0	0.829178	9810	3.26405	0.0093466	7811	3.2508	0.0103351	1130	3.15242	0.0275012	331	3.23293	0.046349	247	3.20081	0.054467	0	NA	NA	0	NA	NA	291
Intrinsic	MedicalMeasurement	BloodCell	Lymphocytes	Continuous	dmp;lld1;300ob;lld2	4	9745	7764	1114	330	247	0	0	290	0	0	9745	0.97599	0.981498	0.976331	0.976285	0	0	0.973154	0	0	0.823684	9745	1.96352	0.00590708	7764	1.96325	0.00667246	1114	2.03057	0.016824	330	1.84697	0.0296252	247	1.8766	0.035097	0	NA	NA	0	NA	NA	290
Intrinsic	MedicalMeasurement	BloodCell	Monocytes	Continuous	dmp;lld1;300ob;lld2	4	9745	7764	1114	330	247	0	0	290	0	0	9745	0.97599	0.981498	0.976331	0.976285	0	0	0.973154	0	0	0.823684	9745	0.488734	0.0014891	7764	0.486477	0.00164676	1114	0.499722	0.004676	330	0.486333	0.00818787	247	0.493117	0.00952675	0	NA	NA	0	NA	NA	290
Intrinsic	MedicalMeasurement	BloodChem	Sodium	Continuous	dmp	1	8304	7811	0	246	247	0	0	0	0	0	8304	0.981898	0	0.727811	0.976285	0	0	0	0	0	0.701885	8304	140.976	0.0182747	7811	140.987	0.0187792	0	NA	NA	246	140.813	0.111359	247	140.806	0.11115	0	NA	NA	0	NA	NA	0
Intrinsic	MedicalMeasurement	BloodCell	Thrombocytes	Continuous	dmp;lld1;300ob;lld2	4	9799	7797	1129	331	247	0	0	295	0	0	9799	0.980138	0.994714	0.97929	0.976285	0	0	0.989933	0	0	0.828248	9799	256.461	0.600474	7797	259.819	0.681023	1129	240.439	1.55193	331	254.287	3.10634	247	257.437	3.59398	0	NA	NA	0	NA	NA	295
Intrinsic	MedicalMeasurement	BloodChem	TG	Continuous	dmp;lld1;300ob;lld2	4	9815	7811	1130	331	247	0	0	296	0	0	9815	0.981898	0.995595	0.97929	0.976285	0	0	0.993289	0	0	0.8296	9815	1.18606	0.00803087	7811	1.16954	0.00872851	1130	1.15057	0.0259254	331	1.13665	0.0360795	247	1.15425	0.0449385	0	NA	NA	0	NA	NA	296
Intrinsic	MedicalMeasurement	UrineChem	UrineCreatinine	Continuous	dmp	1	7797	7308	0	244	245	0	0	0	0	0	7797	0.918668	0	0.721893	0.968379	0	0	0	0	0	0.659031	7797	8.11275	0.044397	7308	8.10746	0.0457493	0	NA	NA	244	8.19713	0.260356	245	8.18653	0.259507	0	NA	NA	0	NA	NA	0
Intrinsic	HealthDisease	HematologyCardiovascularMetabolic	Anemia	Binary	dmp;lld1	2	9561	7955	1102	251	253	0	0	0	0	0	9561	1	0.970925	0.742604	1	0	0	0	0	0	0.808131	9561	1400	14.6428	7955	1147	14.4186	1102	169	14.8899	251	42	12.426	253	42	16.6008	0	0	0	0	0	0	0
Intrinsic	HealthDisease	HematologyCardiovascularMetabolic	Thrombosis	Binary	dmp	1	8459	7955	0	251	253	0	0	0	0	0	8459	1	0	0.742604	1	0	0	0	0	0	0.714986	8459	109	1.28857	7955	101	1.26964	0	0	0	251	4	1.18343	253	4	1.58103	0	0	0	0	0	0	0
Intrinsic	HealthDisease	Cancer	CancerAnyNonBasal	Binary	dmp	1	8459	7955	0	251	253	0	0	0	0	0	8459	1	0	0.742604	1	0	0	0	0	0	0.714986	8459	308	3.64109	7955	292	3.67065	0	0	0	251	8	2.36686	253	8	3.16206	0	0	0	0	0	0	0
Intrinsic	HealthDisease	Cancer	CancerAny	Binary	dmp	1	8459	7955	0	251	253	0	0	0	0	0	8459	1	0	0.742604	1	0	0	0	0	0	0.714986	8459	476	5.62714	7955	452	5.68196	0	0	0	251	12	3.5503	253	12	4.74308	0	0	0	0	0	0	0
Intrinsic	HealthDisease	Cancer	CancerBreast	Binary	dmp	1	4895	4618	0	138	139	0	0	0	0	0	4895	0.580515	0	0.408284	0.549407	0	0	0	0	0	0.413744	4895	92	1.87947	4618	90	1.13136	0	0	0	138	1	0.295858	139	1	0.395257	0	0	0	0	0	0	0
Intrinsic	HealthDisease	Cancer	CancerCervix	Binary	dmp	1	4895	4618	0	138	139	0	0	0	0	0	4895	0.580515	0	0.408284	0.549407	0	0	0	0	0	0.413744	4895	47	0.960163	4618	43	0.540541	0	0	0	138	2	0.591716	139	2	0.790514	0	0	0	0	0	0	0
Intrinsic	HealthDisease	Cancer	CancerColon	Binary	dmp	1	8459	7955	0	251	253	0	0	0	0	0	8459	1	0	0.742604	1	0	0	0	0	0	0.714986	8459	24	0.283721	7955	20	0.251414	0	0	0	251	2	0.591716	253	2	0.790514	0	0	0	0	0	0	0
Intrinsic	HealthDisease	Cancer	CancerMelanoma	Binary	dmp	1	8459	7955	0	251	253	0	0	0	0	0	8459	1	0	0.742604	1	0	0	0	0	0	0.714986	8459	33	0.390117	7955	33	0.414833	0	0	0	251	0	0	253	0	0	0	0	0	0	0	0	0
Intrinsic	HealthDisease	Cancer	CancerProstate	Binary	dmp	1	3564	3337	0	113	114	0	0	0	0	0	3564	0.419485	0	0.33432	0.450593	0	0	0	0	0	0.301242	3564	32	0.897868	3337	30	0.377121	0	0	0	113	1	0.295858	114	1	0.395257	0	0	0	0	0	0	0
Intrinsic	HealthDisease	Cancer	CancerSkinBasal	Binary	dmp	1	8459	7955	0	251	253	0	0	0	0	0	8459	1	0	0.742604	1	0	0	0	0	0	0.714986	8459	179	2.11609	7955	171	2.14959	0	0	0	251	4	1.18343	253	4	1.58103	0	0	0	0	0	0	0
Intrinsic	HealthDisease	HematologyCardiovascularMetabolic	ArrythmiaMedDiagnosed	Binary	dmp	1	8459	7955	0	251	253	0	0	0	0	0	8459	1	0	0.742604	1	0	0	0	0	0	0.714986	8459	672	7.9442	7955	623	7.83155	0	0	0	251	24	7.10059	253	25	9.88142	0	0	0	0	0	0	0
Intrinsic	HealthDisease	HematologyCardiovascularMetabolic	Atherosclerosis	Binary	dmp	1	8459	7955	0	251	253	0	0	0	0	0	8459	1	0	0.742604	1	0	0	0	0	0	0.714986	8459	40	0.472869	7955	31	0.389692	0	0	0	251	4	1.18343	253	5	1.97628	0	0	0	0	0	0	0
Intrinsic	HealthDisease	HematologyCardiovascularMetabolic	BloodClottingDisorder	Binary	dmp;lld1	2	9561	7955	1102	251	253	0	0	0	0	0	9561	1	0.970925	0.742604	1	0	0	0	0	0	0.808131	9561	55	0.575254	7955	46	0.578253	1102	6	0.528634	251	1	0.295858	253	2	0.790514	0	0	0	0	0	0	0
Intrinsic	HealthDisease	HematologyCardiovascularMetabolic	CloggedArtheries	Binary	dmp	1	8459	7955	0	251	253	0	0	0	0	0	8459	1	0	0.742604	1	0	0	0	0	0	0.714986	8459	57	0.673839	7955	55	0.691389	0	0	0	251	1	0.295858	253	1	0.395257	0	0	0	0	0	0	0
Intrinsic	HealthDisease	HematologyCardiovascularMetabolic	Hypercholesterolaemia	Binary	dmp	1	8459	7955	0	251	253	0	0	0	0	0	8459	1	0	0.742604	1	0	0	0	0	0	0.714986	8459	1058	12.5074	7955	997	12.533	0	0	0	251	30	8.87574	253	31	12.253	0	0	0	0	0	0	0
Intrinsic	HealthDisease	HematologyCardiovascularMetabolic	HeartAttack	Binary	dmp;lld1	2	9561	7955	1102	251	253	0	0	0	0	0	9561	1	0.970925	0.742604	1	0	0	0	0	0	0.808131	9561	124	1.29694	7955	103	1.29478	1102	10	0.881057	251	5	1.47929	253	6	2.37154	0	0	0	0	0	0	0
Intrinsic	HealthDisease	HematologyCardiovascularMetabolic	HeartFailureDisorder	Binary	dmp	1	8459	7955	0	251	253	0	0	0	0	0	8459	1	0	0.742604	1	0	0	0	0	0	0.714986	8459	128	1.51318	7955	121	1.52106	0	0	0	251	3	0.887574	253	4	1.58103	0	0	0	0	0	0	0
Intrinsic	HealthDisease	HematologyCardiovascularMetabolic	HeartRateComplains	Binary	dmp	1	8459	7955	0	251	253	0	0	0	0	0	8459	1	0	0.742604	1	0	0	0	0	0	0.714986	8459	1881	22.2367	7955	1756	22.0742	0	0	0	251	62	18.3432	253	63	24.9012	0	0	0	0	0	0	0
Intrinsic	HealthDisease	HematologyCardiovascularMetabolic	HeartValveProblems	Binary	dmp	1	8459	7955	0	251	253	0	0	0	0	0	8459	1	0	0.742604	1	0	0	0	0	0	0.714986	8459	92	1.0876	7955	84	1.05594	0	0	0	251	4	1.18343	253	4	1.58103	0	0	0	0	0	0	0
Intrinsic	HealthDisease	HematologyCardiovascularMetabolic	Hypertension	Binary	dmp;lld1;300ob	3	9859	7955	1102	251	253	0	0	298	0	0	9859	1	0.970925	0.742604	1	0	0	1	0	0	0.833319	9859	2153	21.8379	7955	1665	20.9302	1102	218	19.207	251	45	13.3136	253	46	18.1818	0	0	0	0	0	0	298
Intrinsic	HealthDisease	HematologyCardiovascularMetabolic	Type1Diabetes	Binary	dmp	1	8459	7955	0	251	253	0	0	0	0	0	8459	1	0	0.742604	1	0	0	0	0	0	0.714986	8459	27	0.319187	7955	23	0.289126	0	0	0	251	2	0.591716	253	2	0.790514	0	0	0	0	0	0	0
Intrinsic	HealthDisease	HematologyCardiovascularMetabolic	Type2Diabetes	Binary	dmp	1	8459	7955	0	251	253	0	0	0	0	0	8459	1	0	0.742604	1	0	0	0	0	0	0.714986	8459	190	2.24613	7955	172	2.16216	0	0	0	251	9	2.66272	253	9	3.55731	0	0	0	0	0	0	0
Intrinsic	HealthDisease	Gastrointestinal	CeliacDisease	Binary	dmp	1	8459	7955	0	251	253	0	0	0	0	0	8459	1	0	0.742604	1	0	0	0	0	0	0.714986	8459	53	0.626552	7955	47	0.590823	0	0	0	251	3	0.887574	253	3	1.18577	0	0	0	0	0	0	0
Intrinsic	HealthDisease	Gastrointestinal	CrohnsDisease	Binary	dmp	1	8459	7955	0	251	253	0	0	0	0	0	8459	1	0	0.742604	1	0	0	0	0	0	0.714986	8459	29	0.34283	7955	27	0.339409	0	0	0	251	1	0.295858	253	1	0.395257	0	0	0	0	0	0	0
Intrinsic	HealthDisease	Gastrointestinal	UlcerativeColitis	Binary	dmp	1	8459	7955	0	251	253	0	0	0	0	0	8459	1	0	0.742604	1	0	0	0	0	0	0.714986	8459	73	0.862986	7955	69	0.867379	0	0	0	251	2	0.591716	253	2	0.790514	0	0	0	0	0	0	0
Intrinsic	HealthDisease	Gastrointestinal	StomachUlcer	Binary	dmp;lld1	2	9561	7955	1102	251	253	0	0	0	0	0	9561	1	0.970925	0.742604	1	0	0	0	0	0	0.808131	9561	342	3.57703	7955	293	3.68322	1102	29	2.55507	251	10	2.95858	253	10	3.95257	0	0	0	0	0	0	0
Intrinsic	HealthDisease	Gastrointestinal	Gallstones	Binary	dmp;lld1	2	9561	7955	1102	251	253	0	0	0	0	0	9561	1	0.970925	0.742604	1	0	0	0	0	0	0.808131	9561	421	4.40331	7955	335	4.21119	1102	50	4.40529	251	18	5.32544	253	18	7.11462	0	0	0	0	0	0	0
Intrinsic	HealthDisease	Gastrointestinal	Hepatitis	Binary	dmp;lld1	2	9561	7955	1102	251	253	0	0	0	0	0	9561	1	0.970925	0.742604	1	0	0	0	0	0	0.808131	9561	44	0.460203	7955	24	0.301697	1102	16	1.40969	251	2	0.591716	253	2	0.790514	0	0	0	0	0	0	0
Intrinsic	HealthDisease	Gastrointestinal	LiverDisorderUnspecific	Binary	dmp	1	8459	7955	0	251	253	0	0	0	0	0	8459	1	0	0.742604	1	0	0	0	0	0	0.714986	8459	34	0.401939	7955	32	0.402263	0	0	0	251	1	0.295858	253	1	0.395257	0	0	0	0	0	0	0
Intrinsic	HealthDisease	MentalNeurological	AddictionAny	Binary	dmp	1	8459	7955	0	251	253	0	0	0	0	0	8459	1	0	0.742604	1	0	0	0	0	0	0.714986	8459	39	0.461047	7955	33	0.414833	0	0	0	251	3	0.887574	253	3	1.18577	0	0	0	0	0	0	0
Intrinsic	HealthDisease	MentalNeurological	ADHD	Binary	dmp;lld1	2	9561	7955	1102	251	253	0	0	0	0	0	9561	1	0.970925	0.742604	1	0	0	0	0	0	0.808131	9561	58	0.606631	7955	47	0.590823	1102	9	0.792952	251	1	0.295858	253	1	0.395257	0	0	0	0	0	0	0
Intrinsic	HealthDisease	MentalNeurological	Agoraphobia	Binary	dmp	1	8459	7955	0	251	253	0	0	0	0	0	8459	1	0	0.742604	1	0	0	0	0	0	0.714986	8459	24	0.283721	7955	24	0.301697	0	0	0	251	0	0	253	0	0	0	0	0	0	0	0	0
Intrinsic	HealthDisease	MentalNeurological	MentalDiseaseAny	Binary	dmp	1	8459	7955	0	251	253	0	0	0	0	0	8459	1	0	0.742604	1	0	0	0	0	0	0.714986	8459	1175	13.8905	7955	1114	14.0038	0	0	0	251	30	8.87574	253	31	12.253	0	0	0	0	0	0	0
Intrinsic	HealthDisease	MentalNeurological	BipolarDisorder	Binary	dmp	1	8459	7955	0	251	253	0	0	0	0	0	8459	1	0	0.742604	1	0	0	0	0	0	0.714986	8459	25	0.295543	7955	25	0.314268	0	0	0	251	0	0	253	0	0	0	0	0	0	0	0	0
Intrinsic	HealthDisease	MentalNeurological	Burnout	Binary	dmp	1	8459	7955	0	251	253	0	0	0	0	0	8459	1	0	0.742604	1	0	0	0	0	0	0.714986	8459	441	5.21338	7955	420	5.2797	0	0	0	251	10	2.95858	253	11	4.34783	0	0	0	0	0	0	0
Intrinsic	HealthDisease	MentalNeurological	Depression	Binary	dmp;lld1	2	9561	7955	1102	251	253	0	0	0	0	0	9561	1	0.970925	0.742604	1	0	0	0	0	0	0.808131	9561	465	4.86351	7955	338	4.2489	1102	115	10.1322	251	6	1.77515	253	6	2.37154	0	0	0	0	0	0	0
Intrinsic	HealthDisease	MentalNeurological	EatingDisorder	Binary	dmp	1	8459	7955	0	251	253	0	0	0	0	0	8459	1	0	0.742604	1	0	0	0	0	0	0.714986	8459	103	1.21764	7955	93	1.16908	0	0	0	251	5	1.47929	253	5	1.97628	0	0	0	0	0	0	0
Intrinsic	HealthDisease	MentalNeurological	OCD	Binary	dmp	1	8459	7955	0	251	253	0	0	0	0	0	8459	1	0	0.742604	1	0	0	0	0	0	0.714986	8459	31	0.366474	7955	27	0.339409	0	0	0	251	2	0.591716	253	2	0.790514	0	0	0	0	0	0	0
Intrinsic	HealthDisease	MentalNeurological	Anxiety	Binary	dmp	1	8459	7955	0	251	253	0	0	0	0	0	8459	1	0	0.742604	1	0	0	0	0	0	0.714986	8459	220	2.60078	7955	212	2.66499	0	0	0	251	4	1.18343	253	4	1.58103	0	0	0	0	0	0	0
Intrinsic	HealthDisease	MentalNeurological	PanicDisorder	Binary	dmp;lld1	2	9561	7955	1102	251	253	0	0	0	0	0	9561	1	0.970925	0.742604	1	0	0	0	0	0	0.808131	9561	246	2.57295	7955	206	2.58957	1102	34	2.99559	251	3	0.887574	253	3	1.18577	0	0	0	0	0	0	0
Intrinsic	HealthDisease	MentalNeurological	SocialPhobia	Binary	dmp	1	8459	7955	0	251	253	0	0	0	0	0	8459	1	0	0.742604	1	0	0	0	0	0	0.714986	8459	53	0.626552	7955	53	0.666248	0	0	0	251	0	0	253	0	0	0	0	0	0	0	0	0
Intrinsic	HealthDisease	MentalNeurological	MultipleSclerosis	Binary	dmp	1	8459	7955	0	251	253	0	0	0	0	0	8459	1	0	0.742604	1	0	0	0	0	0	0.714986	8459	20	0.236435	7955	20	0.251414	0	0	0	251	0	0	253	0	0	0	0	0	0	0	0	0
Intrinsic	HealthDisease	MentalNeurological	DizzinessFalling	Binary	dmp	1	8459	7955	0	251	253	0	0	0	0	0	8459	1	0	0.742604	1	0	0	0	0	0	0.714986	8459	125	1.47772	7955	115	1.44563	0	0	0	251	5	1.47929	253	5	1.97628	0	0	0	0	0	0	0
Intrinsic	HealthDisease	MentalNeurological	Epilepsy	Binary	dmp;lld1	2	9561	7955	1102	251	253	0	0	0	0	0	9561	1	0.970925	0.742604	1	0	0	0	0	0	0.808131	9561	97	1.01454	7955	81	1.01823	1102	12	1.05727	251	2	0.591716	253	2	0.790514	0	0	0	0	0	0	0
Intrinsic	HealthDisease	MentalNeurological	HeadachesDuration	Binary	dmp	1	3282	3093	0	94	95	0	0	0	0	0	3282	0.388812	0	0.278107	0.375494	0	0	0	0	0	0.277407	3282	2097	63.894	3093	1966	24.714	0	0	0	94	65	19.2308	95	66	26.087	0	0	0	0	0	0	0
Intrinsic	HealthDisease	MentalNeurological	HeadachesHowOften	Order	dmp	1	6524	6094	0	214	216	0	0	0	0	0	6524	0.766059	0	0.633136	0.853755	0	0	0	0	0	0.551433	6524	0.574034	0.00780622	6094	0.576633	0.00803585	0	NA	NA	214	0.537383	0.0461784	216	0.537037	0.045868	0	NA	NA	0	NA	NA	0
Intrinsic	HealthDisease	MentalNeurological	ChronicFatigueSyndrome	Binary	dmp;lld1	2	9561	7955	1102	251	253	0	0	0	0	0	9561	1	0.970925	0.742604	1	0	0	0	0	0	0.808131	9561	67	0.700764	7955	53	0.666248	1102	14	1.23348	251	0	0	253	0	0	0	0	0	0	0	0	0
Intrinsic	HealthDisease	MentalNeurological	Fibromyalgia	Binary	dmp;lld1	2	9561	7955	1102	251	253	0	0	0	0	0	9561	1	0.970925	0.742604	1	0	0	0	0	0	0.808131	9561	299	3.12729	7955	263	3.3061	1102	28	2.46696	251	4	1.18343	253	4	1.58103	0	0	0	0	0	0	0
Intrinsic	HealthDisease	MentalNeurological	Migraine	Binary	dmp;lld1	2	9561	7955	1102	251	253	0	0	0	0	0	9561	1	0.970925	0.742604	1	0	0	0	0	0	0.808131	9561	1673	17.4982	7955	1372	17.247	1102	221	19.4714	251	40	11.8343	253	40	15.8103	0	0	0	0	0	0	0
Intrinsic	HealthDisease	MentalNeurological	SeizureFit	Binary	dmp	1	8459	7955	0	251	253	0	0	0	0	0	8459	1	0	0.742604	1	0	0	0	0	0	0.714986	8459	82	0.969382	7955	78	0.980515	0	0	0	251	2	0.591716	253	2	0.790514	0	0	0	0	0	0	0
Intrinsic	HealthDisease	MentalNeurological	Stroke	Binary	dmp	1	8459	7955	0	251	253	0	0	0	0	0	8459	1	0	0.742604	1	0	0	0	0	0	0.714986	8459	72	0.851164	7955	68	0.854808	0	0	0	251	2	0.591716	253	2	0.790514	0	0	0	0	0	0	0
Intrinsic	HealthDisease	GeneralHealth	NoDisease	Binary	dmp	1	8459	7955	0	251	253	0	0	0	0	0	8459	1	0	0.742604	1	0	0	0	0	0	0.714986	8459	1922	22.7214	7955	1830	23.0044	0	0	0	251	46	13.6095	253	46	18.1818	0	0	0	0	0	0	0
Intrinsic	HealthDisease	Autoimmune	RheumatoidArtritis	Binary	dmp;lld1	2	9561	7955	1102	251	253	0	0	0	0	0	9561	1	0.970925	0.742604	1	0	0	0	0	0	0.808131	9561	184	1.92448	7955	159	1.99874	1102	17	1.4978	251	4	1.18343	253	4	1.58103	0	0	0	0	0	0	0
Intrinsic	HealthDisease	Chronic	ChronicCystitis	Binary	dmp	1	8459	7955	0	251	253	0	0	0	0	0	8459	1	0	0.742604	1	0	0	0	0	0	0.714986	8459	135	1.59593	7955	133	1.6719	0	0	0	251	1	0.295858	253	1	0.395257	0	0	0	0	0	0	0
Intrinsic	HealthDisease	Chronic	ChronicInflammationThroatNose	Binary	dmp;lld1	2	9561	7955	1102	251	253	0	0	0	0	0	9561	1	0.970925	0.742604	1	0	0	0	0	0	0.808131	9561	473	4.94718	7955	399	5.01571	1102	58	5.11013	251	8	2.36686	253	8	3.16206	0	0	0	0	0	0	0
Intrinsic	HealthDisease	Chronic	ChronicMuscleWeakness	Binary	dmp	1	8459	7955	0	251	253	0	0	0	0	0	8459	1	0	0.742604	1	0	0	0	0	0	0.714986	8459	449	5.30796	7955	417	5.24199	0	0	0	251	16	4.73373	253	16	6.32411	0	0	0	0	0	0	0
Intrinsic	HealthDisease	Other	FracturesHip	Binary	dmp	1	8459	7955	0	251	253	0	0	0	0	0	8459	1	0	0.742604	1	0	0	0	0	0	0.714986	8459	71	0.839343	7955	63	0.791955	0	0	0	251	4	1.18343	253	4	1.58103	0	0	0	0	0	0	0
Intrinsic	HealthDisease	Other	FracturesOther	Binary	dmp	1	8459	7955	0	251	253	0	0	0	0	0	8459	1	0	0.742604	1	0	0	0	0	0	0.714986	8459	179	2.11609	7955	163	2.04903	0	0	0	251	8	2.36686	253	8	3.16206	0	0	0	0	0	0	0
Intrinsic	HealthDisease	Other	KidneyStones	Binary	dmp;lld1	2	9561	7955	1102	251	253	0	0	0	0	0	9561	1	0.970925	0.742604	1	0	0	0	0	0	0.808131	9561	124	1.29694	7955	101	1.26964	1102	23	2.02643	251	0	0	253	0	0	0	0	0	0	0	0	0
Intrinsic	HealthDisease	Other	Osteoarthritis	Binary	dmp	1	8459	7955	0	251	253	0	0	0	0	0	8459	1	0	0.742604	1	0	0	0	0	0	0.714986	8459	1049	12.401	7955	991	12.4576	0	0	0	251	29	8.57988	253	29	11.4625	0	0	0	0	0	0	0
Intrinsic	HealthDisease	Other	Osteoporosis	Binary	dmp;lld1	2	9561	7955	1102	251	253	0	0	0	0	0	9561	1	0.970925	0.742604	1	0	0	0	0	0	0.808131	9561	175	1.83035	7955	154	1.93589	1102	17	1.4978	251	2	0.591716	253	2	0.790514	0	0	0	0	0	0	0
Intrinsic	HealthDisease	Pulmonary	Asthma	Binary	dmp;lld1	2	9560	7955	1101	251	253	0	0	0	0	0	9560	1	0.970044	0.742604	1	0	0	0	0	0	0.808047	9560	507	5.30335	7955	373	4.68887	1101	116	10.2203	251	9	2.66272	253	9	3.55731	0	0	0	0	0	0	0
Intrinsic	HealthDisease	Pulmonary	COPD	Binary	dmp;lld1	2	9561	7955	1102	251	253	0	0	0	0	0	9561	1	0.970925	0.742604	1	0	0	0	0	0	0.808131	9561	318	3.32601	7955	258	3.24324	1102	50	4.40529	251	5	1.47929	253	5	1.97628	0	0	0	0	0	0	0
Intrinsic	HealthDisease	Pulmonary	PulmonaryEmbolism	Binary	dmp	1	8459	7955	0	251	253	0	0	0	0	0	8459	1	0	0.742604	1	0	0	0	0	0	0.714986	8459	45	0.531978	7955	43	0.540541	0	0	0	251	1	0.295858	253	1	0.395257	0	0	0	0	0	0	0
Intrinsic	HealthDisease	Dermatological	AtopicDermatitis	Binary	dmp	1	8459	7955	0	251	253	0	0	0	0	0	8459	1	0	0.742604	1	0	0	0	0	0	0.714986	8459	1266	14.9663	7955	1153	14.494	0	0	0	251	56	16.568	253	57	22.5296	0	0	0	0	0	0	0
Intrinsic	HealthDisease	Dermatological	Psoriasis	Binary	dmp;lld1	2	9561	7955	1102	251	253	0	0	0	0	0	9561	1	0.970925	0.742604	1	0	0	0	0	0	0.808131	9561	250	2.61479	7955	213	2.67756	1102	27	2.37885	251	5	1.47929	253	5	1.97628	0	0	0	0	0	0	0
Intrinsic	HealthDisease	Dermatological	SevereAcne	Binary	dmp	1	8459	7955	0	251	253	0	0	0	0	0	8459	1	0	0.742604	1	0	0	0	0	0	0.714986	8459	211	2.49438	7955	211	2.65242	0	0	0	251	0	0	253	0	0	0	0	0	0	0	0	0
Intrinsic	HealthDisease	GeneralHealth	GeneralHealthChange1Y	Order	dmp	1	7059	6591	0	233	235	0	0	0	0	0	7059	0.828536	0	0.689349	0.928854	0	0	0	0	0	0.596653	7059	0.0922227	0.00841372	6591	0.0960401	0.0086584	0	NA	NA	233	0.0429185	0.0497089	235	0.0340426	0.0496812	0	NA	NA	0	NA	NA	0
Intrinsic	HealthDisease	GeneralHealth	GeneralHealth	Order	dmp	1	7059	6591	0	233	235	0	0	0	0	0	7059	0.828536	0	0.689349	0.928854	0	0	0	0	0	0.596653	7059	1.37272	0.00938512	6591	1.36671	0.00967848	0	NA	NA	233	1.45923	0.0540403	235	1.45532	0.0536503	0	NA	NA	0	NA	NA	0
Intrinsic	MedicalMeasurement	HealthIndex	FibrosisScoreT1Level	Order	dmp	1	2082	2082	0	0	0	0	0	0	0	0	2082	0.261722	0	0	0	0	0	0	0	0	0.175978	2082	1.17963	0.00855121	2082	1.17963	0.00855121	0	NA	NA	0	NA	NA	0	NA	NA	0	NA	NA	0	NA	NA	0
Intrinsic	MedicalMeasurement	HealthIndex	FibrosisScoreT1Number	Continuous	dmp	1	2091	2091	0	0	0	0	0	0	0	0	2091	0.262854	0	0	0	0	0	0	0	0	0.176739	2091	-2.35398	0.0234599	2091	-2.35398	0.0234599	0	NA	NA	0	NA	NA	0	NA	NA	0	NA	NA	0	NA	NA	0
Intrinsic	MedicalMeasurement	HealthIndex	FattyLiverIndexT1Number	Continuous	dmp	1	2102	2102	0	0	0	0	0	0	0	0	2102	0.264236	0	0	0	0	0	0	0	0	0.177669	2102	32.219	0.563879	2102	32.219	0.563879	0	NA	NA	0	NA	NA	0	NA	NA	0	NA	NA	0	NA	NA	0
Intrinsic	MedicalMeasurement	HealthIndex	FattyLiverIndexT1Class	Order	dmp	1	2102	2102	0	0	0	0	0	0	0	0	2102	0.264236	0	0	0	0	0	0	0	0	0.177669	2102	1.60086	0.0167302	2102	1.60086	0.0167302	0	NA	NA	0	NA	NA	0	NA	NA	0	NA	NA	0	NA	NA	0
Intrinsic	MedicalMeasurement	HealthIndex	NAFLD.T1Class	Order	dmp	1	2091	2091	0	0	0	0	0	0	0	0	2091	0.262854	0	0	0	0	0	0	0	0	0.176739	2091	1.1846	0.00883007	2091	1.1846	0.00883007	0	NA	NA	0	NA	NA	0	NA	NA	0	NA	NA	0	NA	NA	0
Exposure	MedicationUse	Drug	ACE.Inhibitors	Binary	dmp;lld1	2	9594	7955	1135	251	253	0	0	0	0	0	9594	1	1	0.742604	1	0	0	0	0	0	0.81092	9594	314	3.27288	7955	248	3.11754	1135	44	3.87665	251	11	3.25444	253	11	4.34783	0	0	0	0	0	0	0
Exposure	MedicationUse	Drug	AcetanilideDerivatives	Binary	dmp	1	8459	7955	0	251	253	0	0	0	0	0	8459	1	0	0.742604	1	0	0	0	0	0	0.714986	8459	242	2.86086	7955	230	2.89126	0	0	0	251	6	1.77515	253	6	2.37154	0	0	0	0	0	0	0
Exposure	MedicationUse	Drug	AlphaBlockers	Binary	dmp;lld1;ibd	3	10018	7955	1135	251	253	0	0	0	424	0	10018	1	1	0.742604	1	0	0	0	0.779412	0	0.846759	10018	80	0.798563	7955	66	0.829667	1135	10	0.881057	251	1	0.295858	253	1	0.395257	0	0	0	0	0	0	0
Exposure	MedicationUse	Drug	ARBs	Binary	dmp;lld1;ibd;lld2	4	10105	7955	1135	338	253	0	0	0	424	0	10105	1	1	1	1	0	0	0	0.779412	0	0.854112	10105	282	2.7907	7955	218	2.74041	1135	34	2.99559	338	11	3.25444	253	9	3.55731	0	0	0	0	0	0	0
Exposure	MedicationUse	Drug	AntibacterialEpileptics	Binary	dmp;lld1;ibd	3	10018	7955	1135	251	253	0	0	0	424	0	10018	1	1	0.742604	1	0	0	0	0.779412	0	0.846759	10018	62	0.618886	7955	50	0.628536	1135	5	0.440529	251	1	0.295858	253	1	0.395257	0	0	0	0	0	0	0
Exposure	MedicationUse	Drug	Class1Antiarrithmics	Binary	dmp	1	8459	7955	0	251	253	0	0	0	0	0	8459	1	0	0.742604	1	0	0	0	0	0	0.714986	8459	21	0.248256	7955	19	0.238843	0	0	0	251	1	0.295858	253	1	0.395257	0	0	0	0	0	0	0
Exposure	MedicationUse	Drug	Antibacterials	Binary	dmp	1	8459	7955	0	251	253	0	0	0	0	0	8459	1	0	0.742604	1	0	0	0	0	0	0.714986	8459	51	0.602908	7955	49	0.615965	0	0	0	251	1	0.295858	253	1	0.395257	0	0	0	0	0	0	0
Exposure	MedicationUse	Drug	Anticoagulants	Binary	dmp	1	8459	7955	0	251	253	0	0	0	0	0	8459	1	0	0.742604	1	0	0	0	0	0	0.714986	8459	30	0.354652	7955	28	0.35198	0	0	0	251	1	0.295858	253	1	0.395257	0	0	0	0	0	0	0
Exposure	MedicationUse	Drug	Antihistamines	Binary	dmp;lld1;500fg;ibd	4	10993	7955	1135	251	253	465	510	0	424	0	10993	1	1	0.742604	1	0.987261	0.98646	0	0.779412	0	0.929169	10993	261	2.37424	7955	152	1.91075	1135	69	6.0793	251	6	1.77515	253	6	2.37154	465	6	1.27389	510	8	1.54739	0
Exposure	MedicationUse	Drug	AntiinflammatoryAntirheumaticProducts	Binary	dmp	1	8459	7955	0	251	253	0	0	0	0	0	8459	1	0	0.742604	1	0	0	0	0	0	0.714986	8459	33	0.390117	7955	33	0.414833	0	0	0	251	0	0	253	0	0	0	0	0	0	0	0	0
Exposure	MedicationUse	Drug	AtypicalAntipsychotics	Binary	dmp	1	8459	7955	0	251	253	0	0	0	0	0	8459	1	0	0.742604	1	0	0	0	0	0	0.714986	8459	25	0.295543	7955	23	0.289126	0	0	0	251	1	0.295858	253	1	0.395257	0	0	0	0	0	0	0
Exposure	MedicationUse	Drug	BZRAs	Binary	dmp	1	8459	7955	0	251	253	0	0	0	0	0	8459	1	0	0.742604	1	0	0	0	0	0	0.714986	8459	40	0.472869	7955	38	0.477687	0	0	0	251	1	0.295858	253	1	0.395257	0	0	0	0	0	0	0
Exposure	MedicationUse	Drug	Beta2SympatheticMimetics	Binary	dmp	1	8459	7955	0	251	253	0	0	0	0	0	8459	1	0	0.742604	1	0	0	0	0	0	0.714986	8459	37	0.437404	7955	37	0.465116	0	0	0	251	0	0	253	0	0	0	0	0	0	0	0	0
Exposure	MedicationUse	Drug	BetaBlockers	Binary	dmp;lld1;300ob;ibd;lld2	5	10403	7955	1135	338	253	0	0	298	424	0	10403	1	1	1	1	0	0	1	0.779412	0	0.8793	10403	563	5.4119	7955	375	4.71402	1135	62	5.46256	338	18	5.32544	253	11	4.34783	0	0	0	0	0	0	298
Exposure	MedicationUse	Drug	Biguanides	Binary	dmp	1	8459	7955	0	251	253	0	0	0	0	0	8459	1	0	0.742604	1	0	0	0	0	0	0.714986	8459	111	1.31221	7955	105	1.31992	0	0	0	251	3	0.887574	253	3	1.18577	0	0	0	0	0	0	0
Exposure	MedicationUse	Drug	CalciumChannelBlockers	Binary	dmp;lld1;300ob;ibd	4	10316	7955	1135	251	253	0	0	298	424	0	10316	1	1	0.742604	1	0	0	1	0.779412	0	0.871947	10316	236	2.28771	7955	156	1.96103	1135	21	1.85022	251	6	1.77515	253	6	2.37154	0	0	0	0	0	0	298
Exposure	MedicationUse	Drug	CorticosteroidsEyeDrops	Binary	dmp	1	8459	7955	0	251	253	0	0	0	0	0	8459	1	0	0.742604	1	0	0	0	0	0	0.714986	8459	61	0.721125	7955	59	0.741672	0	0	0	251	1	0.295858	253	1	0.395257	0	0	0	0	0	0	0
Exposure	MedicationUse	Drug	CorticosteroidsOral	Binary	dmp	1	8459	7955	0	251	253	0	0	0	0	0	8459	1	0	0.742604	1	0	0	0	0	0	0.714986	8459	43	0.508334	7955	39	0.490258	0	0	0	251	2	0.591716	253	2	0.790514	0	0	0	0	0	0	0
Exposure	MedicationUse	Drug	EndocrineTherapy	Binary	dmp	1	8459	7955	0	251	253	0	0	0	0	0	8459	1	0	0.742604	1	0	0	0	0	0	0.714986	8459	21	0.248256	7955	19	0.238843	0	0	0	251	1	0.295858	253	1	0.395257	0	0	0	0	0	0	0
Exposure	MedicationUse	Drug	PhenylalkylamineDerivatives	Binary	dmp	1	8459	7955	0	251	253	0	0	0	0	0	8459	1	0	0.742604	1	0	0	0	0	0	0.714986	8459	25	0.295543	7955	21	0.263985	0	0	0	251	2	0.591716	253	2	0.790514	0	0	0	0	0	0	0
Exposure	MedicationUse	Drug	Glucocorticoids	Binary	dmp	1	8459	7955	0	251	253	0	0	0	0	0	8459	1	0	0.742604	1	0	0	0	0	0	0.714986	8459	107	1.26492	7955	99	1.2445	0	0	0	251	4	1.18343	253	4	1.58103	0	0	0	0	0	0	0
Exposure	MedicationUse	Drug	InsulinTherapy	Binary	dmp;lld1;300ob;ibd	4	10316	7955	1135	251	253	0	0	298	424	0	10316	1	1	0.742604	1	0	0	1	0.779412	0	0.871947	10316	56	0.542846	7955	36	0.452546	1135	5	0.440529	251	0	0	253	0	0	0	0	0	0	0	0	298
Exposure	MedicationUse	Drug	IntestinalAntiinflammatoryAgents	Binary	dmp	1	8459	7955	0	251	253	0	0	0	0	0	8459	1	0	0.742604	1	0	0	0	0	0	0.714986	8459	38	0.449226	7955	36	0.452546	0	0	0	251	1	0.295858	253	1	0.395257	0	0	0	0	0	0	0
Exposure	MedicationUse	Drug	IronPreparations	Binary	dmp	1	8459	7955	0	251	253	0	0	0	0	0	8459	1	0	0.742604	1	0	0	0	0	0	0.714986	8459	34	0.401939	7955	32	0.402263	0	0	0	251	1	0.295858	253	1	0.395257	0	0	0	0	0	0	0
Exposure	MedicationUse	Drug	OsmoticLaxatives	Binary	dmp	1	8459	7955	0	251	253	0	0	0	0	0	8459	1	0	0.742604	1	0	0	0	0	0	0.714986	8459	92	1.0876	7955	90	1.13136	0	0	0	251	1	0.295858	253	1	0.395257	0	0	0	0	0	0	0
Exposure	MedicationUse	Drug	BulkFormingLaxatives	Binary	dmp	1	8459	7955	0	251	253	0	0	0	0	0	8459	1	0	0.742604	1	0	0	0	0	0	0.714986	8459	43	0.508334	7955	41	0.515399	0	0	0	251	1	0.295858	253	1	0.395257	0	0	0	0	0	0	0
Exposure	MedicationUse	Drug	LipidModifying	Binary	dmp	1	8459	7955	0	251	253	0	0	0	0	0	8459	1	0	0.742604	1	0	0	0	0	0	0.714986	8459	25	0.295543	7955	25	0.314268	0	0	0	251	0	0	253	0	0	0	0	0	0	0	0	0
Exposure	MedicationUse	Drug	LowCeilingDiuretics	Binary	dmp	1	8459	7955	0	251	253	0	0	0	0	0	8459	1	0	0.742604	1	0	0	0	0	0	0.714986	8459	161	1.9033	7955	151	1.89818	0	0	0	251	5	1.47929	253	5	1.97628	0	0	0	0	0	0	0
Exposure	MedicationUse	Drug	NSAIDs	Binary	dmp;lld1;500fg;ibd	4	10993	7955	1135	251	253	465	510	0	424	0	10993	1	1	0.742604	1	0.987261	0.98646	0	0.779412	0	0.929169	10993	235	2.13772	7955	162	2.03646	1135	42	3.70044	251	3	0.887574	253	3	1.18577	465	0	0	510	4	0.773694	0
Exposure	MedicationUse	Drug	ObstructiveAirways	Binary	dmp	1	8459	7955	0	251	253	0	0	0	0	0	8459	1	0	0.742604	1	0	0	0	0	0	0.714986	8459	21	0.248256	7955	21	0.263985	0	0	0	251	0	0	253	0	0	0	0	0	0	0	0	0
Exposure	MedicationUse	Drug	Opioids	Binary	dmp	1	8459	7955	0	251	253	0	0	0	0	0	8459	1	0	0.742604	1	0	0	0	0	0	0.714986	8459	22	0.260078	7955	22	0.276556	0	0	0	251	0	0	253	0	0	0	0	0	0	0	0	0
Exposure	MedicationUse	Drug	OtherAlimentaryMetabolism	Binary	dmp	1	8459	7955	0	251	253	0	0	0	0	0	8459	1	0	0.742604	1	0	0	0	0	0	0.714986	8459	44	0.520156	7955	42	0.52797	0	0	0	251	1	0.295858	253	1	0.395257	0	0	0	0	0	0	0
Exposure	MedicationUse	Drug	OtherAntiinfectivesSys	Binary	dmp	1	8459	7955	0	251	253	0	0	0	0	0	8459	1	0	0.742604	1	0	0	0	0	0	0.714986	8459	19	0.224613	7955	19	0.238843	0	0	0	251	0	0	253	0	0	0	0	0	0	0	0	0
Exposure	MedicationUse	Drug	OtherAntineoplasticImmunomodulating	Binary	dmp	1	8459	7955	0	251	253	0	0	0	0	0	8459	1	0	0.742604	1	0	0	0	0	0	0.714986	8459	17	0.200969	7955	13	0.163419	0	0	0	251	2	0.591716	253	2	0.790514	0	0	0	0	0	0	0
Exposure	MedicationUse	Drug	OtherAntiparasitic	Binary	dmp	1	8459	7955	0	251	253	0	0	0	0	0	8459	1	0	0.742604	1	0	0	0	0	0	0.714986	8459	16	0.189148	7955	16	0.201131	0	0	0	251	0	0	253	0	0	0	0	0	0	0	0	0
Exposure	MedicationUse	Drug	OtherCardiovascular	Binary	dmp	1	8459	7955	0	251	253	0	0	0	0	0	8459	1	0	0.742604	1	0	0	0	0	0	0.714986	8459	22	0.260078	7955	22	0.276556	0	0	0	251	0	0	253	0	0	0	0	0	0	0	0	0
Exposure	MedicationUse	Drug	OtherDermatologicals	Binary	dmp	1	8459	7955	0	251	253	0	0	0	0	0	8459	1	0	0.742604	1	0	0	0	0	0	0.714986	8459	20	0.236435	7955	18	0.226273	0	0	0	251	1	0.295858	253	1	0.395257	0	0	0	0	0	0	0
Exposure	MedicationUse	Drug	OtherGenitoUrinarySystemSexHormones	Binary	dmp	1	8459	7955	0	251	253	0	0	0	0	0	8459	1	0	0.742604	1	0	0	0	0	0	0.714986	8459	30	0.354652	7955	28	0.35198	0	0	0	251	1	0.295858	253	1	0.395257	0	0	0	0	0	0	0
Exposure	MedicationUse	Drug	OtherMusculoskeletal	Binary	dmp	1	8459	7955	0	251	253	0	0	0	0	0	8459	1	0	0.742604	1	0	0	0	0	0	0.714986	8459	20	0.236435	7955	20	0.251414	0	0	0	251	0	0	253	0	0	0	0	0	0	0	0	0
Exposure	MedicationUse	Drug	OtherNervousSystem	Binary	dmp	1	8459	7955	0	251	253	0	0	0	0	0	8459	1	0	0.742604	1	0	0	0	0	0	0.714986	8459	18	0.212791	7955	18	0.226273	0	0	0	251	0	0	253	0	0	0	0	0	0	0	0	0
Exposure	MedicationUse	Drug	P2Y12Inhibitors	Binary	dmp	1	8459	7955	0	251	253	0	0	0	0	0	8459	1	0	0.742604	1	0	0	0	0	0	0.714986	8459	24	0.283721	7955	24	0.301697	0	0	0	251	0	0	253	0	0	0	0	0	0	0	0	0
Exposure	MedicationUse	Drug	Parasympathicolyticum	Binary	dmp	1	8459	7955	0	251	253	0	0	0	0	0	8459	1	0	0.742604	1	0	0	0	0	0	0.714986	8459	38	0.449226	7955	32	0.402263	0	0	0	251	3	0.887574	253	3	1.18577	0	0	0	0	0	0	0
Exposure	MedicationUse	Drug	PPI	Binary	dmp;lld1;300ob;500fg;ibd;lld2	6	11378	7955	1135	338	253	465	510	298	424	0	11378	1	1	1	1	0.987261	0.98646	1	0.779412	0	0.961711	11378	827	7.26841	7955	532	6.68762	1135	95	8.37004	338	27	7.98817	253	21	8.3004	465	2	0.424628	510	2	0.386847	298
Exposure	MedicationUse	Drug	Psychoanaleptics	Binary	dmp	1	8459	7955	0	251	253	0	0	0	0	0	8459	1	0	0.742604	1	0	0	0	0	0	0.714986	8459	41	0.484691	7955	41	0.515399	0	0	0	251	0	0	253	0	0	0	0	0	0	0	0	0
Exposure	MedicationUse	Drug	Psycholeptics	Binary	dmp	1	8459	7955	0	251	253	0	0	0	0	0	8459	1	0	0.742604	1	0	0	0	0	0	0.714986	8459	22	0.260078	7955	20	0.251414	0	0	0	251	1	0.295858	253	1	0.395257	0	0	0	0	0	0	0
Exposure	MedicationUse	Drug	Salicylates	Binary	dmp	1	8459	7955	0	251	253	0	0	0	0	0	8459	1	0	0.742604	1	0	0	0	0	0	0.714986	8459	222	2.62442	7955	208	2.61471	0	0	0	251	7	2.07101	253	7	2.7668	0	0	0	0	0	0	0
Exposure	MedicationUse	Drug	SSRI	Binary	dmp;lld1;500fg;ibd	4	10993	7955	1135	251	253	465	510	0	424	0	10993	1	1	0.742604	1	0.987261	0.98646	0	0.779412	0	0.929169	10993	279	2.53798	7955	231	2.90383	1135	29	2.55507	251	4	1.18343	253	4	1.58103	465	0	0	510	1	0.193424	0
Exposure	MedicationUse	Drug	OtherLipidModifyingAgents	Binary	dmp	1	8459	7955	0	251	253	0	0	0	0	0	8459	1	0	0.742604	1	0	0	0	0	0	0.714986	8459	22	0.260078	7955	18	0.226273	0	0	0	251	2	0.591716	253	2	0.790514	0	0	0	0	0	0	0
Exposure	MedicationUse	Drug	SexHormonesAndModulators	Binary	dmp	1	8459	7955	0	251	253	0	0	0	0	0	8459	1	0	0.742604	1	0	0	0	0	0	0.714986	8459	36	0.425582	7955	34	0.427404	0	0	0	251	1	0.295858	253	1	0.395257	0	0	0	0	0	0	0
Exposure	MedicationUse	Drug	Statin	Binary	dmp;lld1;300ob;500fg;ibd;lld2	6	11378	7955	1135	338	253	465	510	298	424	0	11378	1	1	1	1	0.987261	0.98646	1	0.779412	0	0.961711	11378	595	5.22939	7955	393	4.94029	1135	56	4.93392	338	21	6.21302	253	18	7.11462	465	0	0	510	2	0.386847	298
Exposure	MedicationUse	Drug	StomachAcid	Binary	dmp	1	8459	7955	0	251	253	0	0	0	0	0	8459	1	0	0.742604	1	0	0	0	0	0	0.714986	8459	22	0.260078	7955	22	0.276556	0	0	0	251	0	0	253	0	0	0	0	0	0	0	0	0
Exposure	MedicationUse	Drug	Sulfonylureas	Binary	dmp;300ob	2	8757	7955	0	251	253	0	0	298	0	0	8757	1	0	0.742604	1	0	0	1	0	0	0.740174	8757	53	0.60523	7955	35	0.439975	0	0	0	251	2	0.591716	253	2	0.790514	0	0	0	0	0	0	298
Exposure	MedicationUse	Drug	Thiazides	Binary	dmp;lld1;ibd	3	10018	7955	1135	251	253	0	0	0	424	0	10018	1	1	0.742604	1	0	0	0	0.779412	0	0.846759	10018	136	1.35756	7955	72	0.905091	1135	43	3.78855	251	2	0.591716	253	2	0.790514	0	0	0	0	0	0	0
Exposure	MedicationUse	Drug	ThyroidHormones	Binary	dmp	1	8459	7955	0	251	253	0	0	0	0	0	8459	1	0	0.742604	1	0	0	0	0	0	0.714986	8459	267	3.1564	7955	257	3.23067	0	0	0	251	5	1.47929	253	5	1.97628	0	0	0	0	0	0	0
Exposure	MedicationUse	Drug	TricyclicAntidepressants	Binary	dmp;lld1;ibd	3	10018	7955	1135	251	253	0	0	0	424	0	10018	1	1	0.742604	1	0	0	0	0.779412	0	0.846759	10018	99	0.988221	7955	69	0.867379	1135	11	0.969163	251	3	0.887574	253	3	1.18577	0	0	0	0	0	0	0
Exposure	MedicationUse	Drug	ThrombocyteAggregationInhibitors	Binary	dmp	1	8459	7955	0	251	253	0	0	0	0	0	8459	1	0	0.742604	1	0	0	0	0	0	0.714986	8459	27	0.319187	7955	27	0.339409	0	0	0	251	0	0	253	0	0	0	0	0	0	0	0	0
Exposure	MedicationUse	Drug	AntivertigoPreparations	Binary	dmp	1	8459	7955	0	251	253	0	0	0	0	0	8459	1	0	0.742604	1	0	0	0	0	0	0.714986	8459	22	0.260078	7955	20	0.251414	0	0	0	251	1	0.295858	253	1	0.395257	0	0	0	0	0	0	0
Exposure	MedicationUse	Drug	VitB	Binary	dmp	1	8459	7955	0	251	253	0	0	0	0	0	8459	1	0	0.742604	1	0	0	0	0	0	0.714986	8459	18	0.212791	7955	18	0.226273	0	0	0	251	0	0	253	0	0	0	0	0	0	0	0	0
Exposure	MedicationUse	Drug	VitD	Binary	dmp;lld1;ibd	3	10018	7955	1135	251	253	0	0	0	424	0	10018	1	1	0.742604	1	0	0	0	0.779412	0	0.846759	10018	149	1.48732	7955	66	0.829667	1135	14	1.23348	251	1	0.295858	253	1	0.395257	0	0	0	0	0	0	0
Exposure	MedicationUse	Drug	VitK.Antagonists	Binary	dmp;lld1;ibd	3	10018	7955	1135	251	253	0	0	0	424	0	10018	1	1	0.742604	1	0	0	0	0.779412	0	0.846759	10018	81	0.808545	7955	60	0.754243	1135	5	0.440529	251	5	1.47929	253	5	1.97628	0	0	0	0	0	0	0
Exposure	MedicationUse	Drug	VitSupp	Binary	dmp	1	8459	7955	0	251	253	0	0	0	0	0	8459	1	0	0.742604	1	0	0	0	0	0	0.714986	8459	44	0.520156	7955	40	0.502828	0	0	0	251	2	0.591716	253	2	0.790514	0	0	0	0	0	0	0
Exposure	MedicationUse	Drug	XanhineOxidaseInhibitors	Binary	dmp	1	8459	7955	0	251	253	0	0	0	0	0	8459	1	0	0.742604	1	0	0	0	0	0	0.714986	8459	28	0.331008	7955	24	0.301697	0	0	0	251	2	0.591716	253	2	0.790514	0	0	0	0	0	0	0
Exposure	HealthDisease	Gastrointestinal	Appendectomy	Binary	dmp	1	8459	7955	0	251	253	0	0	0	0	0	8459	1	0	0.742604	1	0	0	0	0	0	0.714986	8459	702	8.29885	7955	658	8.27153	0	0	0	251	22	6.50888	253	22	8.69565	0	0	0	0	0	0	0
Technique	ExperimentTechniqueSample	DNA	DNA.Concentration	Continuous	dmp	1	8459	7955	0	251	253	0	0	0	0	0	8459	1	0	0.742604	1	0	0	0	0	0	0.714986	8459	54.8124	0.36422	7955	53.887	0.372325	0	NA	NA	251	69.3547	2.19528	253	69.4806	2.17978	0	NA	NA	0	NA	NA	0
Technique	ExperimentTechniqueSample	DNA	CleanReadCount	Continuous	dmp;lld2;lld1;300ob;500fg;ibd;300tzfg	7	11697	7955	1135	338	253	450	517	298	435	316	11697	1	1	1	1	0.955414	1	1	0.799632	0.9875	0.988674	11697	2.26244e+07	67800.8	7955	2.63813e+07	43324.9	1135	1.27097e+07	119332	338	1.23324e+07	255905	253	2.29781e+07	202610	450	1.09269e+07	161821	517	2.47966e+07	248357	298
Intrinsic	Stool	Stool	BristolType	Order	dmp;lld1	2	8966	7401	1091	236	238	0	0	0	0	0	8966	0.930358	0.961233	0.698225	0.940711	0	0	0	0	0	0.75784	8966	3.77516	0.0093154	7401	3.7618	0.010251	1091	3.85127	0.026554	236	3.8092	0.0579921	238	3.808	0.0575442	0	NA	NA	0	NA	NA	0
Intrinsic	Stool	Stool	BristolFreq	Order	dmp;lld1;ibd	3	9382	7401	1083	236	238	0	0	0	424	0	9382	0.930358	0.954185	0.698225	0.940711	0	0	0	0.779412	0	0.793001	9382	1.29617	0.00858352	7401	1.20858	0.00694935	1083	1.37049	0.0178869	236	1.20763	0.0369412	238	1.20888	0.0366433	0	NA	NA	0	NA	NA	0
Exposure	GeographySocioeconomics	Socioeconomic	IncomeMonth	Order	dmp	1	6848	6399	0	224	225	0	0	0	0	0	6848	0.8044	0	0.662722	0.889328	0	0	0	0	0	0.578818	6848	5.79571	0.0219385	6399	5.7809	0.022627	0	NA	NA	224	6.00893	0.125916	225	6.00444	0.125435	0	NA	NA	0	NA	NA	0
Exposure	GeographySocioeconomics	Socioeconomic	Religious	Binary	dmp	1	8459	7955	0	251	253	0	0	0	0	0	8459	1	0	0.742604	1	0	0	0	0	0	0.714986	8459	2039	24.1045	7955	1944	24.4375	0	0	0	251	47	13.9053	253	48	18.9723	0	0	0	0	0	0	0
Exposure	GeographySocioeconomics	Socioeconomic	Retired	Binary	dmp	1	8459	7955	0	251	253	0	0	0	0	0	8459	1	0	0.742604	1	0	0	0	0	0	0.714986	8459	988	11.6799	7955	938	11.7913	0	0	0	251	25	7.39645	253	25	9.88142	0	0	0	0	0	0	0
Exposure	GeographySocioeconomics	Socioeconomic	Schoolgoer	Binary	dmp	1	8459	7955	0	251	253	0	0	0	0	0	8459	1	0	0.742604	1	0	0	0	0	0	0.714986	8459	768	9.07909	7955	708	8.90006	0	0	0	251	30	8.87574	253	30	11.8577	0	0	0	0	0	0	0
Exposure	GeographySocioeconomics	Socioeconomic	PaidworkDays	Continuous	dmp	1	5310	4916	0	196	198	0	0	0	0	0	5310	0.617976	0	0.579882	0.782609	0	0	0	0	0	0.448821	5310	4.20603	0.0161871	4916	4.20199	0.0168945	0	NA	NA	196	4.2602	0.0795279	198	4.25253	0.0796363	0	NA	NA	0	NA	NA	0
Exposure	GeographySocioeconomics	Socioeconomic	PaidworkHours	Continuous	dmp	1	5313	4919	0	196	198	0	0	0	0	0	5313	0.618353	0	0.579882	0.782609	0	0	0	0	0	0.449074	5313	31.4811	0.170151	4919	31.3188	0.177384	0	NA	NA	196	33.5459	0.837669	198	33.4697	0.836953	0	NA	NA	0	NA	NA	0
Exposure	GeographySocioeconomics	Socioeconomic	HouseWifeHusband	Binary	dmp	1	5879	5463	0	207	209	0	0	0	0	0	5879	0.686738	0	0.612426	0.826087	0	0	0	0	0	0.496915	5879	388	6.59976	5463	372	4.6763	0	0	0	207	8	2.36686	209	8	3.16206	0	0	0	0	0	0	0
Exposure	GeographySocioeconomics	Socioeconomic	PaidworkAny	Binary	dmp	1	5879	5463	0	207	209	0	0	0	0	0	5879	0.686738	0	0.612426	0.826087	0	0	0	0	0	0.496915	5879	5314	90.3895	5463	4920	61.8479	0	0	0	207	196	57.9882	209	198	78.2609	0	0	0	0	0	0	0
Exposure	GeographySocioeconomics	Socioeconomic	Unemployed	Binary	dmp	1	5879	5463	0	207	209	0	0	0	0	0	5879	0.686738	0	0.612426	0.826087	0	0	0	0	0	0.496915	5879	234	3.98027	5463	222	2.7907	0	0	0	207	6	1.77515	209	6	2.37154	0	0	0	0	0	0	0
Exposure	GeographySocioeconomics	Socioeconomic	HighIncomePopProp	Continuous	dmp	1	8190	7704	0	242	244	0	0	0	0	0	8190	0.968448	0	0.715976	0.964427	0	0	0	0	0	0.692249	8190	17.1291	0.0813836	7704	17.0144	0.0825314	0	NA	NA	242	18.9711	0.572371	244	18.9221	0.568749	0	NA	NA	0	NA	NA	0
Exposure	GeographySocioeconomics	Socioeconomic	LowIncomePopProp	Continuous	dmp	1	8190	7704	0	242	244	0	0	0	0	0	8190	0.968448	0	0.715976	0.964427	0	0	0	0	0	0.692249	8190	41.4687	0.0759646	7704	41.4422	0.0754014	0	NA	NA	242	41.8843	0.65163	244	41.8934	0.646414	0	NA	NA	0	NA	NA	0
Exposure	GeographySocioeconomics	Socioeconomic	Urbanicity	Order	dmp	1	8446	7942	0	251	253	0	0	0	0	0	8446	0.998366	0	0.742604	1	0	0	0	0	0	0.713887	8446	3.95252	0.013088	7942	3.99748	0.0131103	0	NA	NA	251	3.251	0.0937223	253	3.23715	0.0935335	0	NA	NA	0	NA	NA	0
Technique	ExperimentTechniqueSample	Sample	PoopCollectionSeason	Category	dmp	1	7434	6962	0	235	237	0	0	0	0	0	7434	0.875173	0	0.695266	0.936759	0	0	0	0	0	0.628349	NA	NA	NA	NA	NA	NA	NA	NA	NA	NA	NA	NA	NA	NA	NA	NA	NA	NA	NA	NA	NA	NA
Technique	ExperimentTechniqueSample	Batch	MetaSeqBatch	Category	dmp	1	8459	7955	0	251	253	0	0	0	0	0	8459	1	0	0.742604	1	0	0	0	0	0	0.714986	NA	NA	NA	NA	NA	NA	NA	NA	NA	NA	NA	NA	NA	NA	NA	NA	NA	NA	NA	NA	NA	NA
Exposure	MedicationUse	Drug	Antibiotics	Binary	dmp;lld1;500fg;ibd	4	9495	6537	1135	211	213	465	510	0	424	0	9495	0.821747	1	0.62426	0.841897	0.987261	0.98646	0	0.779412	0	0.802553	9495	536	5.64508	6537	466	5.85795	1135	13	1.14537	211	11	3.25444	213	11	4.34783	465	10	2.12314	510	15	2.90135	0
Intrinsic	HealthDisease	Gastrointestinal	Rome3IBS.Any	Binary	dmp	1	6224	5806	0	208	210	0	0	0	0	0	6224	0.729855	0	0.615385	0.83004	0	0	0	0	0	0.526076	6224	677	10.8772	5806	623	7.83155	0	0	0	208	27	7.98817	210	27	10.6719	0	0	0	0	0	0	0
Intrinsic	HealthDisease	Gastrointestinal	Rome3IBS.TypeC	Binary	dmp	1	6224	5806	0	208	210	0	0	0	0	0	6224	0.729855	0	0.615385	0.83004	0	0	0	0	0	0.526076	6224	146	2.34576	5806	134	1.68448	0	0	0	208	6	1.77515	210	6	2.37154	0	0	0	0	0	0	0
Intrinsic	HealthDisease	Gastrointestinal	Rome3IBS.TypeM	Binary	dmp	1	6224	5806	0	208	210	0	0	0	0	0	6224	0.729855	0	0.615385	0.83004	0	0	0	0	0	0.526076	6224	282	4.53085	5806	256	3.2181	0	0	0	208	13	3.84615	210	13	5.13834	0	0	0	0	0	0	0
Intrinsic	HealthDisease	Gastrointestinal	Rome3IBS.TypeD	Binary	dmp	1	6224	5806	0	208	210	0	0	0	0	0	6224	0.729855	0	0.615385	0.83004	0	0	0	0	0	0.526076	6224	186	2.98843	5806	178	2.23759	0	0	0	208	4	1.18343	210	4	1.58103	0	0	0	0	0	0	0
Intrinsic	HealthDisease	Gastrointestinal	FGID.Bloating	Binary	dmp	1	6224	5806	0	208	210	0	0	0	0	0	6224	0.729855	0	0.615385	0.83004	0	0	0	0	0	0.526076	6224	430	6.90874	5806	398	5.00314	0	0	0	208	16	4.73373	210	16	6.32411	0	0	0	0	0	0	0
Intrinsic	HealthDisease	Gastrointestinal	FGID.Constipation	Binary	dmp	1	6224	5806	0	208	210	0	0	0	0	0	6224	0.729855	0	0.615385	0.83004	0	0	0	0	0	0.526076	6224	201	3.22943	5806	193	2.42615	0	0	0	208	4	1.18343	210	4	1.58103	0	0	0	0	0	0	0
Intrinsic	HealthDisease	Gastrointestinal	FGID.Diarrhea	Binary	dmp	1	6224	5806	0	208	210	0	0	0	0	0	6224	0.729855	0	0.615385	0.83004	0	0	0	0	0	0.526076	6224	84	1.34961	5806	80	1.00566	0	0	0	208	2	0.591716	210	2	0.790514	0	0	0	0	0	0	0
Intrinsic	HealthDisease	Gastrointestinal	GI.DiscomfortUnwell	Continuous	dmp	1	7462	6984	0	238	240	0	0	0	0	0	7462	0.877938	0	0.704142	0.948617	0	0	0	0	0	0.630716	7462	1.20616	0.0041074	6984	1.20471	0.00417371	0	NA	NA	238	1.22835	0.0281465	240	1.22645	0.0279438	0	NA	NA	0	NA	NA	0
Intrinsic	HealthDisease	Gastrointestinal	GI.DiscomfortPain	Continuous	dmp	1	7462	6984	0	238	240	0	0	0	0	0	7462	0.877938	0	0.704142	0.948617	0	0	0	0	0	0.630716	7462	1.10712	0.00309106	6984	1.10663	0.00315187	0	NA	NA	238	1.11477	0.0204989	240	1.11381	0.0203389	0	NA	NA	0	NA	NA	0
Intrinsic	HealthDisease	Gastrointestinal	GI.DiscomfortBloating	Continuous	dmp	1	7462	6984	0	238	240	0	0	0	0	0	7462	0.877938	0	0.704142	0.948617	0	0	0	0	0	0.630716	7462	1.18595	0.00425025	6984	1.18414	0.00435131	0	NA	NA	238	1.21337	0.0269421	240	1.21159	0.0267466	0	NA	NA	0	NA	NA	0
Intrinsic	HealthDisease	Gastrointestinal	GI.DiscomfortFlatulence	Continuous	dmp	1	7462	6984	0	238	240	0	0	0	0	0	7462	0.877938	0	0.704142	0.948617	0	0	0	0	0	0.630716	7462	1.48985	0.00569887	6984	1.48772	0.0058235	0	NA	NA	238	1.52188	0.0368953	240	1.52021	0.0366214	0	NA	NA	0	NA	NA	0
Intrinsic	HealthDisease	Gastrointestinal	GI.DiscomfortBurping	Continuous	dmp	1	7462	6984	0	238	240	0	0	0	0	0	7462	0.877938	0	0.704142	0.948617	0	0	0	0	0	0.630716	7462	1.1023	0.00314581	6984	1.10334	0.00329445	0	NA	NA	238	1.08746	0.0138084	240	1.08674	0.0137027	0	NA	NA	0	NA	NA	0
Intrinsic	HealthDisease	Gastrointestinal	GI.DiscomfortNausea	Continuous	dmp	1	7462	6984	0	238	240	0	0	0	0	0	7462	0.877938	0	0.704142	0.948617	0	0	0	0	0	0.630716	7462	1.04293	0.00180158	6984	1.04231	0.00185067	0	NA	NA	238	1.05221	0.0109878	240	1.05178	0.0109004	0	NA	NA	0	NA	NA	0
Intrinsic	HealthDisease	Gastrointestinal	Rome3IBS.Factor	Category	dmp	1	6224	5806	0	208	210	0	0	0	0	0	6224	0.729855	0	0.615385	0.83004	0	0	0	0	0	0.526076	NA	NA	NA	NA	NA	NA	NA	NA	NA	NA	NA	NA	NA	NA	NA	NA	NA	NA	NA	NA	NA	NA
Exposure	EarlyLifeExposure	EarlyLifePets	PetsChild0to15Y.Any	Binary	dmp	1	8459	7955	0	251	253	0	0	0	0	0	8459	1	0	0.742604	1	0	0	0	0	0	0.714986	8459	5538	65.4687	7955	5205	65.4305	0	0	0	251	166	49.1124	253	167	66.0079	0	0	0	0	0	0	0
Exposure	EarlyLifeExposure	EarlyLifePets	PetsChild0to15Y.Dog	Binary	dmp	1	8459	7955	0	251	253	0	0	0	0	0	8459	1	0	0.742604	1	0	0	0	0	0	0.714986	8459	3922	46.3648	7955	3692	46.4111	0	0	0	251	115	34.0237	253	115	45.4545	0	0	0	0	0	0	0
Exposure	EarlyLifeExposure	EarlyLifePets	PetsChild0to15Y.Cat	Binary	dmp	1	8459	7955	0	251	253	0	0	0	0	0	8459	1	0	0.742604	1	0	0	0	0	0	0.714986	8459	3803	44.958	7955	3582	45.0283	0	0	0	251	110	32.5444	253	111	43.8735	0	0	0	0	0	0	0
Intrinsic	MedicalMeasurement	BloodCell	Leukocytes	Continuous	lld1;300ob;lld2	3	1754	0	1129	331	0	0	0	294	0	0	1754	0	0.994714	0.97929	0	0	0	0.986577	0	0	0.148255	1754	5.9868	0.0398898	0	NA	NA	1129	6.06094	0.0519604	331	5.73414	0.0851312	0	NA	NA	0	NA	NA	0	NA	NA	294
Intrinsic	MedicalMeasurement	BloodCell	Granulocytes	Continuous	lld1;lld2	2	1444	0	1114	330	0	0	0	0	0	0	1444	0	0.981498	0.976331	0	0	0	0	0	0	0.122052	1444	3.28674	0.0315271	0	NA	NA	1114	3.26754	0.0369046	330	3.35155	0.0592122	0	NA	NA	0	NA	NA	0	NA	NA	0
Intrinsic	MedicalMeasurement	BloodChem	TC	Continuous	lld1;300ob;lld2	3	1757	0	1130	331	0	0	0	296	0	0	1757	0	0.995595	0.97929	0	0	0	0.993289	0	0	0.148508	1757	5.25393	0.0264499	0	NA	NA	1130	5.03553	0.0300422	331	5.08036	0.0491903	0	NA	NA	0	NA	NA	0	NA	NA	296
Intrinsic	HealthDisease	GeneralHealth	QOL.Mental	Continuous	lld1	1	1053	0	1053	0	0	0	0	0	0	0	1053	0	0.927753	0	0	0	0	0	0	0	0.0890035	1053	50.513	0.23935	0	NA	NA	1053	50.513	0.23935	0	NA	NA	0	NA	NA	0	NA	NA	0	NA	NA	0
Intrinsic	HealthDisease	GeneralHealth	QOL.Physical	Continuous	lld1	1	1053	0	1053	0	0	0	0	0	0	0	1053	0	0.927753	0	0	0	0	0	0	0	0.0890035	1053	53.4555	0.21177	0	NA	NA	1053	53.4555	0.21177	0	NA	NA	0	NA	NA	0	NA	NA	0	NA	NA	0
Intrinsic	MedicalMeasurement	Inflammation	Citrullin	Continuous	lld1	1	963	0	963	0	0	0	0	0	0	0	963	0	0.848458	0	0	0	0	0	0	0	0.0813963	963	42.5749	0.369902	0	NA	NA	963	42.5749	0.369902	0	NA	NA	0	NA	NA	0	NA	NA	0	NA	NA	0
Intrinsic	MedicalMeasurement	Inflammation	IL1b	Continuous	lld1;300ob	2	1262	0	964	0	0	0	0	298	0	0	1262	0	0.849339	0	0	0	0	1	0	0	0.106669	1262	0.779683	0.226173	0	NA	NA	964	0.97805	0.295762	0	NA	NA	0	NA	NA	0	NA	NA	0	NA	NA	298
Intrinsic	MedicalMeasurement	Inflammation	IL6	Continuous	lld1;300ob	2	1262	0	964	0	0	0	0	298	0	0	1262	0	0.849339	0	0	0	0	1	0	0	0.106669	1262	2.23036	0.267306	0	NA	NA	964	1.58934	0.237192	0	NA	NA	0	NA	NA	0	NA	NA	0	NA	NA	298
Intrinsic	MedicalMeasurement	Inflammation	IL8	Continuous	lld1	1	964	0	964	0	0	0	0	0	0	0	964	0	0.849339	0	0	0	0	0	0	0	0.0814809	964	2.58849	0.194031	0	NA	NA	964	2.58849	0.194031	0	NA	NA	0	NA	NA	0	NA	NA	0	NA	NA	0
Intrinsic	MedicalMeasurement	Inflammation	IL10	Continuous	lld1	1	964	0	964	0	0	0	0	0	0	0	964	0	0.849339	0	0	0	0	0	0	0	0.0814809	964	1.00356	0.0350116	0	NA	NA	964	1.00356	0.0350116	0	NA	NA	0	NA	NA	0	NA	NA	0	NA	NA	0
Intrinsic	MedicalMeasurement	Inflammation	IL12p70	Continuous	lld1	1	964	0	964	0	0	0	0	0	0	0	964	0	0.849339	0	0	0	0	0	0	0	0.0814809	964	2.74374	1.17486	0	NA	NA	964	2.74374	1.17486	0	NA	NA	0	NA	NA	0	NA	NA	0	NA	NA	0
Intrinsic	MedicalMeasurement	Inflammation	TNFa	Continuous	lld1	1	964	0	964	0	0	0	0	0	0	0	964	0	0.849339	0	0	0	0	0	0	0	0.0814809	964	1.18967	0.139357	0	NA	NA	964	1.18967	0.139357	0	NA	NA	0	NA	NA	0	NA	NA	0	NA	NA	0
Intrinsic	MedicalMeasurement	HealthIndex	ChrA	Continuous	lld1;ibd	2	1541	0	1130	0	0	0	0	0	411	0	1541	0	0.995595	0	0	0	0	0	0.755515	0	0.130251	1541	17.2681	0.845452	0	NA	NA	1130	23.2179	1.10091	0	NA	NA	0	NA	NA	0	NA	NA	0	NA	NA	0
Intrinsic	MedicalMeasurement	Inflammation	BetaDefensin2	Continuous	lld1;ibd	2	1541	0	1130	0	0	0	0	0	411	0	1541	0	0.995595	0	0	0	0	0	0.755515	0	0.130251	1541	101.834	3.64066	0	NA	NA	1130	51.917	1.74102	0	NA	NA	0	NA	NA	0	NA	NA	0	NA	NA	0
Intrinsic	MedicalMeasurement	Inflammation	Calprotectin	Continuous	lld1;ibd	2	1554	0	1130	0	0	0	0	0	424	0	1554	0	0.995595	0	0	0	0	0	0.779412	0	0.13135	1554	43.5427	2.70678	0	NA	NA	1130	59.7225	3.60691	0	NA	NA	0	NA	NA	0	NA	NA	0	NA	NA	0
Intrinsic	MedicalMeasurement	BloodChem	Insulin	Continuous	lld1;300ob	2	1170	0	872	0	0	0	0	298	0	0	1170	0	0.768282	0	0	0	0	1	0	0	0.0988927	1170	21.2133	1.19345	0	NA	NA	872	10.4561	0.215981	0	NA	NA	0	NA	NA	0	NA	NA	0	NA	NA	298
Intrinsic	HealthDisease	GeneralHealth	QOL.Health	Order	lld1	1	1117	0	1117	0	0	0	0	0	0	0	1117	0	0.984141	0	0	0	0	0	0	0	0.094413	1117	3.50671	0.0250015	0	NA	NA	1117	3.50671	0.0250015	0	NA	NA	0	NA	NA	0	NA	NA	0	NA	NA	0
Exposure	CurrentExposure	Smoking	SmokingHistory	Order	lld1	1	1122	0	1122	0	0	0	0	0	0	0	1122	0	0.988546	0	0	0	0	0	0	0	0.0948356	1122	0.71123	0.0230187	0	NA	NA	1122	0.71123	0.0230187	0	NA	NA	0	NA	NA	0	NA	NA	0	NA	NA	0
Exposure	EarlyLifeExposure	EarlyLifeParent	SmokingFather	Binary	lld1	1	1095	0	1095	0	0	0	0	0	0	0	1095	0	0.964758	0	0	0	0	0	0	0	0.0925535	1095	730	66.6667	0	0	0	1095	730	64.3172	0	0	0	0	0	0	0	0	0	0	0	0	0
Exposure	EarlyLifeExposure	EarlyLifeParent	SmokingMother	Binary	lld1	1	1099	0	1099	0	0	0	0	0	0	0	1099	0	0.968282	0	0	0	0	0	0	0	0.0928916	1099	405	36.8517	0	0	0	1099	405	35.6828	0	0	0	0	0	0	0	0	0	0	0	0	0
Exposure	Diet	Diet	Vegetarian	Binary	lld1;300tzfg;300tzfg	3	1421	0	1105	0	0	0	0	0	0	316	1421	0	0.973568	0	0	0	0	0	0	0.9875	0.120108	1421	85	5.9817	0	0	0	1105	85	7.48899	0	0	0	0	0	0	0	0	0	0	0	0	0
Exposure	Diet	Diet	FruitFreqPerWeek	Order	lld1;300tzfg	2	1420	0	1104	0	0	0	0	0	0	316	1420	0	0.972687	0	0	0	0	0	0	0.9875	0.120024	1420	4.74085	0.0433044	0	NA	NA	1104	4.76268	0.0425997	0	NA	NA	0	NA	NA	0	NA	NA	0	NA	NA	0
Exposure	Diet	Diet	MeatFreqPerWeek	Order	lld1;300tzfg	2	1420	0	1104	0	0	0	0	0	0	316	1420	0	0.972687	0	0	0	0	0	0	0.9875	0.120024	1420	4.08169	0.0417636	0	NA	NA	1104	4.6413	0.0380171	0	NA	NA	0	NA	NA	0	NA	NA	0	NA	NA	0
Exposure	Diet	Diet	VegetableFreqPerWeek	Order	lld1;300tzfg	2	1420	0	1104	0	0	0	0	0	0	316	1420	0	0.972687	0	0	0	0	0	0	0.9875	0.120024	1420	5	0.0343246	0	NA	NA	1104	4.93116	0.0303108	0	NA	NA	0	NA	NA	0	NA	NA	0	NA	NA	0
Exposure	Diet	Diet	MilkFreqPerWeek	Order	lld1	1	0	0	0	0	0	0	0	0	0	0	0	0	0	0	0	0	0	0	0	0	0	0	NA	NA	0	NA	NA	0	NA	NA	0	NA	NA	0	NA	NA	0	NA	NA	0	NA	NA	0
Exposure	Diet	Diet	FishFreqPerWeek	Order	lld1;300tzfg	2	1419	0	1103	0	0	0	0	0	0	316	1419	0	0.971806	0	0	0	0	0	0	0.9875	0.119939	1419	2.29316	0.0364957	0	NA	NA	1103	2.1913	0.0372284	0	NA	NA	0	NA	NA	0	NA	NA	0	NA	NA	0
Exposure	Diet	Diet	RiceFreqPerWeek	Order	lld1;300tzfg	2	1418	0	1102	0	0	0	0	0	0	316	1418	0	0.970925	0	0	0	0	0	0	0.9875	0.119855	1418	2.67842	0.0400651	0	NA	NA	1102	2.44646	0.0371482	0	NA	NA	0	NA	NA	0	NA	NA	0	NA	NA	0
Intrinsic	HealthDisease	HematologyCardiovascularMetabolic	Diabetes	Binary	lld1;300ob;500fg	3	2376	0	1103	0	0	465	510	298	0	0	2376	0	0.971806	0	0	0.987261	0.98646	1	0	0	0.200828	2376	66	2.77778	0	0	0	1103	27	2.37885	0	0	0	0	0	0	465	0	0	510	4	0.773694	298
Intrinsic	HealthDisease	Ophthalmological	Catarract	Binary	lld1	1	1102	0	1102	0	0	0	0	0	0	0	1102	0	0.970925	0	0	0	0	0	0	0	0.0931451	1102	14	1.27042	0	0	0	1102	14	1.23348	0	0	0	0	0	0	0	0	0	0	0	0	0
Intrinsic	HealthDisease	Gastrointestinal	IBD	Binary	lld1;ibd	2	1526	0	1102	0	0	0	0	0	424	0	1526	0	0.970925	0	0	0	0	0	0.779412	0	0.128983	1526	435	28.5059	0	0	0	1102	11	0.969163	0	0	0	0	0	0	0	0	0	0	0	0	0
Intrinsic	HealthDisease	Gastrointestinal	IBS	Binary	lld1	1	1102	0	1102	0	0	0	0	0	0	0	1102	0	0.970925	0	0	0	0	0	0	0	0.0931451	1102	112	10.1633	0	0	0	1102	112	9.86784	0	0	0	0	0	0	0	0	0	0	0	0	0
Intrinsic	HealthDisease	Chronic	ChronicBladderInfection	Binary	lld1	1	1102	0	1102	0	0	0	0	0	0	0	1102	0	0.970925	0	0	0	0	0	0	0	0.0931451	1102	19	1.72414	0	0	0	1102	19	1.67401	0	0	0	0	0	0	0	0	0	0	0	0	0
Intrinsic	HealthDisease	Other	Incontinence	Binary	lld1	1	1102	0	1102	0	0	0	0	0	0	0	1102	0	0.970925	0	0	0	0	0	0	0	0.0931451	1102	22	1.99637	0	0	0	1102	22	1.93833	0	0	0	0	0	0	0	0	0	0	0	0	0
Intrinsic	HealthDisease	Other	Arthrosis	Binary	lld1	1	1102	0	1102	0	0	0	0	0	0	0	1102	0	0.970925	0	0	0	0	0	0	0	0.0931451	1102	76	6.89655	0	0	0	1102	76	6.69604	0	0	0	0	0	0	0	0	0	0	0	0	0
Intrinsic	HealthDisease	Other	NeckOrBackHernia	Binary	lld1	1	1102	0	1102	0	0	0	0	0	0	0	1102	0	0.970925	0	0	0	0	0	0	0	0.0931451	1102	62	5.62613	0	0	0	1102	62	5.46256	0	0	0	0	0	0	0	0	0	0	0	0	0
Intrinsic	HealthDisease	Dermatological	Acne	Binary	lld1	1	1102	0	1102	0	0	0	0	0	0	0	1102	0	0.970925	0	0	0	0	0	0	0	0.0931451	1102	29	2.63158	0	0	0	1102	29	2.55507	0	0	0	0	0	0	0	0	0	0	0	0	0
Intrinsic	HealthDisease	Dermatological	Eczema	Binary	lld1	1	1102	0	1102	0	0	0	0	0	0	0	1102	0	0.970925	0	0	0	0	0	0	0	0.0931451	1102	171	15.5172	0	0	0	1102	171	15.0661	0	0	0	0	0	0	0	0	0	0	0	0	0
Intrinsic	HealthDisease	Allergy	FoodAllergy	Binary	lld1	1	1102	0	1102	0	0	0	0	0	0	0	1102	0	0.970925	0	0	0	0	0	0	0	0.0931451	1102	90	8.16697	0	0	0	1102	90	7.92952	0	0	0	0	0	0	0	0	0	0	0	0	0
Intrinsic	HealthDisease	Allergy	DustAllergy	Binary	lld1	1	1102	0	1102	0	0	0	0	0	0	0	1102	0	0.970925	0	0	0	0	0	0	0	0.0931451	1102	184	16.6969	0	0	0	1102	184	16.2115	0	0	0	0	0	0	0	0	0	0	0	0	0
Intrinsic	HealthDisease	Allergy	AnimalsAllergy	Binary	lld1	1	1102	0	1102	0	0	0	0	0	0	0	1102	0	0.970925	0	0	0	0	0	0	0	0.0931451	1102	152	13.7931	0	0	0	1102	152	13.3921	0	0	0	0	0	0	0	0	0	0	0	0	0
Intrinsic	HealthDisease	Allergy	InsectBitesAllergy	Binary	lld1	1	1102	0	1102	0	0	0	0	0	0	0	1102	0	0.970925	0	0	0	0	0	0	0	0.0931451	1102	48	4.35572	0	0	0	1102	48	4.22907	0	0	0	0	0	0	0	0	0	0	0	0	0
Intrinsic	HealthDisease	Allergy	PollenAllergy	Binary	lld1	1	1102	0	1102	0	0	0	0	0	0	0	1102	0	0.970925	0	0	0	0	0	0	0	0.0931451	1102	244	22.1416	0	0	0	1102	244	21.4978	0	0	0	0	0	0	0	0	0	0	0	0	0
Intrinsic	HealthDisease	Allergy	MedicationAllergy	Binary	lld1	1	1102	0	1102	0	0	0	0	0	0	0	1102	0	0.970925	0	0	0	0	0	0	0	0.0931451	1102	87	7.89474	0	0	0	1102	87	7.6652	0	0	0	0	0	0	0	0	0	0	0	0	0
Intrinsic	HealthDisease	Allergy	ContactAllergy	Binary	lld1	1	1102	0	1102	0	0	0	0	0	0	0	1102	0	0.970925	0	0	0	0	0	0	0	0.0931451	1102	102	9.2559	0	0	0	1102	102	8.98678	0	0	0	0	0	0	0	0	0	0	0	0	0
Exposure	MedicationUse	Drug	AntiAndrogenOralContraceptive	Binary	lld1;ibd	2	1559	0	1135	0	0	0	0	0	424	0	1559	0	1	0	0	0	0	0	0.779412	0	0.131772	1559	16	1.0263	0	0	0	1135	14	1.23348	0	0	0	0	0	0	0	0	0	0	0	0	0
Exposure	MedicationUse	Drug	BenzodiazepineDerivativesRelated	Binary	lld1;ibd	2	1559	0	1135	0	0	0	0	0	424	0	1559	0	1	0	0	0	0	0	0.779412	0	0.131772	1559	44	2.82232	0	0	0	1135	28	2.46696	0	0	0	0	0	0	0	0	0	0	0	0	0
Exposure	MedicationUse	Drug	BetaSympathomimeticInhaler	Binary	lld1;ibd	2	1559	0	1135	0	0	0	0	0	424	0	1559	0	1	0	0	0	0	0	0.779412	0	0.131772	1559	80	5.13149	0	0	0	1135	65	5.72687	0	0	0	0	0	0	0	0	0	0	0	0	0
Exposure	MedicationUse	Drug	Bisphosphonates	Binary	lld1;ibd	2	1559	0	1135	0	0	0	0	0	424	0	1559	0	1	0	0	0	0	0	0.779412	0	0.131772	1559	23	1.4753	0	0	0	1135	10	0.881057	0	0	0	0	0	0	0	0	0	0	0	0	0
Exposure	MedicationUse	Drug	CalciumSupplements	Binary	lld1;ibd	2	1559	0	1135	0	0	0	0	0	424	0	1559	0	1	0	0	0	0	0	0.779412	0	0.131772	1559	88	5.64464	0	0	0	1135	14	1.23348	0	0	0	0	0	0	0	0	0	0	0	0	0
Exposure	MedicationUse	Drug	Ferrum	Binary	lld1;ibd	2	1559	0	1135	0	0	0	0	0	424	0	1559	0	1	0	0	0	0	0	0.779412	0	0.131772	1559	22	1.41116	0	0	0	1135	7	0.61674	0	0	0	0	0	0	0	0	0	0	0	0	0
Exposure	MedicationUse	Drug	FolicAcid	Binary	lld1;ibd	2	1559	0	1135	0	0	0	0	0	424	0	1559	0	1	0	0	0	0	0	0.779412	0	0.131772	1559	38	2.43746	0	0	0	1135	7	0.61674	0	0	0	0	0	0	0	0	0	0	0	0	0
Exposure	MedicationUse	Drug	HormonalIUD	Binary	lld1;ibd	2	1559	0	1135	0	0	0	0	0	424	0	1559	0	1	0	0	0	0	0	0.779412	0	0.131772	1559	66	4.23348	0	0	0	1135	61	5.37445	0	0	0	0	0	0	0	0	0	0	0	0	0
Exposure	MedicationUse	Drug	K.SavingDiuretic	Binary	lld1;ibd	2	1559	0	1135	0	0	0	0	0	424	0	1559	0	1	0	0	0	0	0	0.779412	0	0.131772	1559	16	1.0263	0	0	0	1135	7	0.61674	0	0	0	0	0	0	0	0	0	0	0	0	0
Exposure	MedicationUse	Drug	Laxatives	Binary	lld1;ibd	2	1559	0	1135	0	0	0	0	0	424	0	1559	0	1	0	0	0	0	0	0.779412	0	0.131772	1559	50	3.20718	0	0	0	1135	21	1.85022	0	0	0	0	0	0	0	0	0	0	0	0	0
Exposure	MedicationUse	Drug	Melatonine	Binary	lld1;ibd	2	1559	0	1135	0	0	0	0	0	424	0	1559	0	1	0	0	0	0	0	0.779412	0	0.131772	1559	10	0.641437	0	0	0	1135	6	0.528634	0	0	0	0	0	0	0	0	0	0	0	0	0
Exposure	MedicationUse	Drug	Mesalazines	Binary	lld1;ibd	2	1559	0	1135	0	0	0	0	0	424	0	1559	0	1	0	0	0	0	0	0.779412	0	0.131772	1559	163	10.4554	0	0	0	1135	6	0.528634	0	0	0	0	0	0	0	0	0	0	0	0	0
Exposure	MedicationUse	Drug	Metformin	Binary	lld1;300ob;ibd	3	1857	0	1135	0	0	0	0	298	424	0	1857	0	1	0	0	0	0	1	0.779412	0	0.156961	1857	43	2.31556	0	0	0	1135	15	1.32159	0	0	0	0	0	0	0	0	0	0	0	0	298
Exposure	MedicationUse	Drug	Methylphenidate	Binary	lld1;ibd	2	1559	0	1135	0	0	0	0	0	424	0	1559	0	1	0	0	0	0	0	0.779412	0	0.131772	1559	9	0.577293	0	0	0	1135	5	0.440529	0	0	0	0	0	0	0	0	0	0	0	0	0
Exposure	MedicationUse	Drug	Opiat	Binary	lld1;ibd	2	1559	0	1135	0	0	0	0	0	424	0	1559	0	1	0	0	0	0	0	0.779412	0	0.131772	1559	35	2.24503	0	0	0	1135	13	1.14537	0	0	0	0	0	0	0	0	0	0	0	0	0
Exposure	MedicationUse	Drug	OralAntidiabetics	Binary	lld1;ibd	2	1559	0	1135	0	0	0	0	0	424	0	1559	0	1	0	0	0	0	0	0.779412	0	0.131772	1559	15	0.962155	0	0	0	1135	8	0.704846	0	0	0	0	0	0	0	0	0	0	0	0	0
Exposure	MedicationUse	Drug	OralContraceptives	Binary	lld1;500fg;ibd	3	2534	0	1135	0	0	465	510	0	424	0	2534	0	1	0	0	0.987261	0.98646	0	0.779412	0	0.214183	2534	174	6.86661	0	0	0	1135	116	10.2203	0	0	0	0	0	0	465	4	0.849257	510	4	0.773694	0
Exposure	MedicationUse	Drug	OralSteroid	Binary	lld1;ibd	2	1559	0	1135	0	0	0	0	0	424	0	1559	0	1	0	0	0	0	0	0.779412	0	0.131772	1559	87	5.5805	0	0	0	1135	5	0.440529	0	0	0	0	0	0	0	0	0	0	0	0	0
Exposure	MedicationUse	Drug	OtherAntidepressants	Binary	lld1;ibd	2	1559	0	1135	0	0	0	0	0	424	0	1559	0	1	0	0	0	0	0	0.779412	0	0.131772	1559	19	1.21873	0	0	0	1135	10	0.881057	0	0	0	0	0	0	0	0	0	0	0	0	0
Exposure	MedicationUse	Drug	Paracetamol	Binary	lld1;ibd	2	1559	0	1135	0	0	0	0	0	424	0	1559	0	1	0	0	0	0	0	0.779412	0	0.131772	1559	51	3.27133	0	0	0	1135	11	0.969163	0	0	0	0	0	0	0	0	0	0	0	0	0
Exposure	MedicationUse	Drug	ParasympatholyticInhaler	Binary	lld1;ibd	2	1559	0	1135	0	0	0	0	0	424	0	1559	0	1	0	0	0	0	0	0.779412	0	0.131772	1559	6	0.384862	0	0	0	1135	5	0.440529	0	0	0	0	0	0	0	0	0	0	0	0	0
Exposure	MedicationUse	Drug	PlateletAggregationInhibitor	Binary	lld1;ibd;lld2	3	1897	0	1135	338	0	0	0	0	424	0	1897	0	1	1	0	0	0	0	0.779412	0	0.160341	1897	70	3.69004	0	0	0	1135	34	2.99559	338	10	2.95858	0	0	0	0	0	0	0	0	0	0
Exposure	MedicationUse	Drug	SteroidInhaler	Binary	lld1;ibd	2	1559	0	1135	0	0	0	0	0	424	0	1559	0	1	0	0	0	0	0	0.779412	0	0.131772	1559	74	4.74663	0	0	0	1135	57	5.02203	0	0	0	0	0	0	0	0	0	0	0	0	0
Exposure	MedicationUse	Drug	SteroidNoseSpray	Binary	lld1;ibd	2	1559	0	1135	0	0	0	0	0	424	0	1559	0	1	0	0	0	0	0	0.779412	0	0.131772	1559	62	3.97691	0	0	0	1135	56	4.93392	0	0	0	0	0	0	0	0	0	0	0	0	0
Exposure	MedicationUse	Drug	Thyrax	Binary	lld1;ibd	2	1559	0	1135	0	0	0	0	0	424	0	1559	0	1	0	0	0	0	0	0.779412	0	0.131772	1559	35	2.24503	0	0	0	1135	26	2.29075	0	0	0	0	0	0	0	0	0	0	0	0	0
Exposure	MedicationUse	Drug	Triptans	Binary	lld1;ibd	2	1559	0	1135	0	0	0	0	0	424	0	1559	0	1	0	0	0	0	0	0.779412	0	0.131772	1559	25	1.60359	0	0	0	1135	20	1.76211	0	0	0	0	0	0	0	0	0	0	0	0	0
Exposure	MedicationUse	Drug	VitB12	Binary	lld1;ibd	2	1559	0	1135	0	0	0	0	0	424	0	1559	0	1	0	0	0	0	0	0.779412	0	0.131772	1559	86	5.51636	0	0	0	1135	10	0.881057	0	0	0	0	0	0	0	0	0	0	0	0	0
Intrinsic	MedicalMeasurement	HeartVascular	ABI	Continuous	300ob	1	298	0	0	0	0	0	0	298	0	0	298	0	0	0	0	0	0	1	0	0	0.0251881	298	1.18756	0.0078194	0	NA	NA	0	NA	NA	0	NA	NA	0	NA	NA	0	NA	NA	0	NA	NA	298
Intrinsic	MedicalMeasurement	HeartVascular	PlaqueNumber	Continuous	300ob	1	298	0	0	0	0	0	0	298	0	0	298	0	0	0	0	0	0	1	0	0	0.0251881	298	0.805369	0.0521509	0	NA	NA	0	NA	NA	0	NA	NA	0	NA	NA	0	NA	NA	0	NA	NA	298
Intrinsic	MedicalMeasurement	HealthIndex	LiverFat	Continuous	300ob	1	268	0	0	0	0	0	0	268	0	0	268	0	0	0	0	0	0	0.899329	0	0	0.0226524	268	0.123997	0.00823135	0	NA	NA	0	NA	NA	0	NA	NA	0	NA	NA	0	NA	NA	0	NA	NA	268
Intrinsic	MedicalMeasurement	HealthIndex	AdipocyteArea	Continuous	300ob	1	260	0	0	0	0	0	0	260	0	0	260	0	0	0	0	0	0	0.872483	0	0	0.0219762	260	2382.89	46.9145	0	NA	NA	0	NA	NA	0	NA	NA	0	NA	NA	0	NA	NA	0	NA	NA	260
Intrinsic	MedicalMeasurement	BloodChem	Urate	Continuous	300ob	1	295	0	0	0	0	0	0	295	0	0	295	0	0	0	0	0	0	0.989933	0	0	0.0249345	295	0.379197	0.00520586	0	NA	NA	0	NA	NA	0	NA	NA	0	NA	NA	0	NA	NA	0	NA	NA	295
Intrinsic	MedicalMeasurement	BloodChem	NHDL	Continuous	300ob	1	296	0	0	0	0	0	0	296	0	0	296	0	0	0	0	0	0	0.993289	0	0	0.025019	296	4.95101	0.064182	0	NA	NA	0	NA	NA	0	NA	NA	0	NA	NA	0	NA	NA	0	NA	NA	296
Intrinsic	MedicalMeasurement	BloodCell	Erytrocytes	Continuous	300ob	1	295	0	0	0	0	0	0	295	0	0	295	0	0	0	0	0	0	0.989933	0	0	0.0249345	295	4.72827	0.0237031	0	NA	NA	0	NA	NA	0	NA	NA	0	NA	NA	0	NA	NA	0	NA	NA	295
Intrinsic	MedicalMeasurement	BloodCell	MCHC	Continuous	300ob	1	295	0	0	0	0	0	0	295	0	0	295	0	0	0	0	0	0	0.989933	0	0	0.0249345	295	21.278	0.122248	0	NA	NA	0	NA	NA	0	NA	NA	0	NA	NA	0	NA	NA	0	NA	NA	295
Intrinsic	MedicalMeasurement	BloodCell	MCV	Continuous	300ob	1	295	0	0	0	0	0	0	295	0	0	295	0	0	0	0	0	0	0.989933	0	0	0.0249345	295	90.0834	0.241353	0	NA	NA	0	NA	NA	0	NA	NA	0	NA	NA	0	NA	NA	0	NA	NA	295
Intrinsic	MedicalMeasurement	BloodCell	MCH	Continuous	300ob	1	295	0	0	0	0	0	0	295	0	0	295	0	0	0	0	0	0	0.989933	0	0	0.0249345	295	1917.4	13.3877	0	NA	NA	0	NA	NA	0	NA	NA	0	NA	NA	0	NA	NA	0	NA	NA	295
Intrinsic	MedicalMeasurement	BloodCell	RDW	Continuous	300ob	1	295	0	0	0	0	0	0	295	0	0	295	0	0	0	0	0	0	0.989933	0	0	0.0249345	295	13.3732	0.0413368	0	NA	NA	0	NA	NA	0	NA	NA	0	NA	NA	0	NA	NA	0	NA	NA	295
Intrinsic	MedicalMeasurement	BloodCell	NeutrophilsPerc	Continuous	300ob	1	290	0	0	0	0	0	0	290	0	0	290	0	0	0	0	0	0	0.973154	0	0	0.0245119	290	55.2534	0.449177	0	NA	NA	0	NA	NA	0	NA	NA	0	NA	NA	0	NA	NA	0	NA	NA	290
Intrinsic	MedicalMeasurement	BloodCell	LymphocytesPerc	Continuous	300ob	1	290	0	0	0	0	0	0	290	0	0	290	0	0	0	0	0	0	0.973154	0	0	0.0245119	290	32.5738	0.438606	0	NA	NA	0	NA	NA	0	NA	NA	0	NA	NA	0	NA	NA	0	NA	NA	290
Intrinsic	MedicalMeasurement	BloodCell	MonocytesPerc	Continuous	300ob	1	290	0	0	0	0	0	0	290	0	0	290	0	0	0	0	0	0	0.973154	0	0	0.0245119	290	8.53655	0.111082	0	NA	NA	0	NA	NA	0	NA	NA	0	NA	NA	0	NA	NA	0	NA	NA	290
Intrinsic	MedicalMeasurement	BloodCell	EosinophilsPerc	Continuous	300ob	1	290	0	0	0	0	0	0	290	0	0	290	0	0	0	0	0	0	0.973154	0	0	0.0245119	290	3.07966	0.113531	0	NA	NA	0	NA	NA	0	NA	NA	0	NA	NA	0	NA	NA	0	NA	NA	290
Intrinsic	MedicalMeasurement	BloodCell	BasophilsPerc	Continuous	300ob	1	290	0	0	0	0	0	0	290	0	0	290	0	0	0	0	0	0	0.973154	0	0	0.0245119	290	0.556552	0.015819	0	NA	NA	0	NA	NA	0	NA	NA	0	NA	NA	0	NA	NA	0	NA	NA	290
Intrinsic	MedicalMeasurement	BloodChem	HBA1	Continuous	300ob	1	223	0	0	0	0	0	0	223	0	0	223	0	0	0	0	0	0	0.748322	0	0	0.0188488	223	5.96861	0.0468928	0	NA	NA	0	NA	NA	0	NA	NA	0	NA	NA	0	NA	NA	0	NA	NA	223
Intrinsic	MedicalMeasurement	BloodChem	UricAcid	Continuous	300ob	1	295	0	0	0	0	0	0	295	0	0	295	0	0	0	0	0	0	0.989933	0	0	0.0249345	295	0.379254	0.00521423	0	NA	NA	0	NA	NA	0	NA	NA	0	NA	NA	0	NA	NA	0	NA	NA	295
Intrinsic	MedicalMeasurement	Inflammation	IL18bpa	Continuous	300ob	1	298	0	0	0	0	0	0	298	0	0	298	0	0	0	0	0	0	1	0	0	0.0251881	298	1.78746	0.0333922	0	NA	NA	0	NA	NA	0	NA	NA	0	NA	NA	0	NA	NA	0	NA	NA	298
Intrinsic	MedicalMeasurement	Hormone	Resistin	Continuous	300ob;lld1	2	1358	0	1060	0	0	0	0	298	0	0	1358	0	0.933921	0	0	0	0	1	0	0	0.114783	1358	14.8052	0.177215	0	NA	NA	1060	15.6632	0.190363	0	NA	NA	0	NA	NA	0	NA	NA	0	NA	NA	298
Intrinsic	MedicalMeasurement	Hormone	Leptin	Continuous	300ob;lld1	2	1358	0	1060	0	0	0	0	298	0	0	1358	0	0.933921	0	0	0	0	1	0	0	0.114783	1358	17.3948	0.472617	0	NA	NA	1060	15.5555	0.485864	0	NA	NA	0	NA	NA	0	NA	NA	0	NA	NA	298
Intrinsic	MedicalMeasurement	Hormone	Adiponectin	Continuous	300ob;lld1	2	1358	0	1060	0	0	0	0	298	0	0	1358	0	0.933921	0	0	0	0	1	0	0	0.114783	1358	4.19588	0.059559	0	NA	NA	1060	4.06708	0.0644603	0	NA	NA	0	NA	NA	0	NA	NA	0	NA	NA	298
Intrinsic	MedicalMeasurement	HealthIndex	AAT	Continuous	300ob;lld1	2	1358	0	1060	0	0	0	0	298	0	0	1358	0	0.933921	0	0	0	0	1	0	0	0.114783	1358	1.00243	0.0154979	0	NA	NA	1060	0.957104	0.0162335	0	NA	NA	0	NA	NA	0	NA	NA	0	NA	NA	298
Intrinsic	MedicalMeasurement	Inflammation	IL18	Continuous	300ob;lld1	2	1167	0	869	0	0	0	0	298	0	0	1167	0	0.765639	0	0	0	0	1	0	0	0.0986392	1167	166.063	7.63558	0	NA	NA	869	82.3567	3.22094	0	NA	NA	0	NA	NA	0	NA	NA	0	NA	NA	298
Intrinsic	MedicalMeasurement	HealthIndex	VEGF	Continuous	300ob	1	298	0	0	0	0	0	0	298	0	0	298	0	0	0	0	0	0	1	0	0	0.0251881	298	49.4779	3.42556	0	NA	NA	0	NA	NA	0	NA	NA	0	NA	NA	0	NA	NA	0	NA	NA	298
Intrinsic	HealthDisease	HematologyCardiovascularMetabolic	Dyslipidemia	Binary	300ob	1	298	0	0	0	0	0	0	298	0	0	298	0	0	0	0	0	0	1	0	0	0.0251881	298	280	93.9597	0	0	0	0	0	0	0	0	0	0	0	0	0	0	0	0	0	0	298
Exposure	MedicationUse	Drug	Antidiabetics	Binary	300ob	1	298	0	0	0	0	0	0	298	0	0	298	0	0	0	0	0	0	1	0	0	0.0251881	298	25	8.38926	0	0	0	0	0	0	0	0	0	0	0	0	0	0	0	0	0	0	298
Exposure	MedicationUse	Drug	AntibioticsFreq	Order	500fg	1	0	0	0	0	0	0	0	0	0	0	0	0	0	0	0	0	0	0	0	0	0	0	NA	NA	0	NA	NA	0	NA	NA	0	NA	NA	0	NA	NA	0	NA	NA	0	NA	NA	0
Exposure	Diet	Diet	Probiotics	Binary	500fg	1	0	0	0	0	0	0	0	0	0	0	0	0	0	0	0	0	0	0	0	0	0	0	0	NA	0	0	0	0	0	0	0	0	0	0	0	0	0	0	0	0	0	0	0
Exposure	CurrentExposure	Smoking	SmokingStartAge	Continuous	500fg	1	143	0	0	0	0	66	77	0	0	0	143	0	0	0	0	0.140127	0.148936	0	0	0	0.0120869	143	17.028	0.220791	0	NA	NA	0	NA	NA	0	NA	NA	0	NA	NA	66	16.9848	0.329223	77	17.0649	0.299429	0
Exposure	MedicationUse	Drug	ACE.Inhibitor	Binary	ibd;lld2	2	762	0	0	338	0	0	0	0	424	0	762	0	0	1	0	0	0	0	0.779412	0	0.0644071	762	38	4.98688	0	0	0	0	0	0	338	16	4.73373	0	0	0	0	0	0	0	0	0	0
Intrinsic	MedicalMeasurement	Inflammation	IL18bpx	Continuous	lld1	1	1060	0	1060	0	0	0	0	0	0	0	1060	0	0.933921	0	0	0	0	0	0	0	0.0895951	1060	15.6344	0.16993	0	NA	NA	1060	15.6344	0.16993	0	NA	NA	0	NA	NA	0	NA	NA	0	NA	NA	0
Technique	ExperimentTechniqueSample	DNA	RawReadCount	Continuous	lld2	1	338	0	0	338	0	0	0	0	0	0	338	0	0	1	0	0	0	0	0	0	0.028569	338	1.52931e+07	276625	0	NA	NA	0	NA	NA	338	1.52931e+07	276625	0	NA	NA	0	NA	NA	0	NA	NA	0
Intrinsic	MedicalMeasurement	BloodChem	FetalHemoglobin	Continuous	lld2	1	338	0	0	338	0	0	0	0	0	0	338	0	0	1	0	0	0	0	0	0	0.028569	338	68.9941	0.617762	0	NA	NA	0	NA	NA	338	68.9941	0.617762	0	NA	NA	0	NA	NA	0	NA	NA	0
Intrinsic	Metabolite	PlasmaBileAcid	C4	Continuous	lld1;300ob	2	1352	0	1055	0	0	0	0	297	0	0	1352	0	0.929515	0	0	0	0	0.996644	0	0	0.114276	1352	43.7177	1.2711	0	NA	NA	1055	40.1273	1.18206	0	NA	NA	0	NA	NA	0	NA	NA	0	NA	NA	297
Intrinsic	Metabolite	PlasmaBileAcid	CA	Continuous	lld1;300ob	2	1352	0	1055	0	0	0	0	297	0	0	1352	0	0.929515	0	0	0	0	0.996644	0	0	0.114276	1352	0.233053	0.013242	0	NA	NA	1055	0.244288	0.0156199	0	NA	NA	0	NA	NA	0	NA	NA	0	NA	NA	297
Intrinsic	Metabolite	PlasmaBileAcid	GCA	Continuous	lld1;300ob	2	1352	0	1055	0	0	0	0	297	0	0	1352	0	0.929515	0	0	0	0	0.996644	0	0	0.114276	1352	0.158749	0.00589335	0	NA	NA	1055	0.165701	0.0064266	0	NA	NA	0	NA	NA	0	NA	NA	0	NA	NA	297
Intrinsic	Metabolite	PlasmaBileAcid	TCA	Continuous	lld1;300ob	2	1352	0	1055	0	0	0	0	297	0	0	1352	0	0.929515	0	0	0	0	0.996644	0	0	0.114276	1352	0.0343632	0.0015968	0	NA	NA	1055	0.0364976	0.00152039	0	NA	NA	0	NA	NA	0	NA	NA	0	NA	NA	297
Intrinsic	Metabolite	PlasmaBileAcid	CDCA	Continuous	lld1;300ob	2	1352	0	1055	0	0	0	0	297	0	0	1352	0	0.929515	0	0	0	0	0.996644	0	0	0.114276	1352	0.281791	0.0142801	0	NA	NA	1055	0.295134	0.0171822	0	NA	NA	0	NA	NA	0	NA	NA	0	NA	NA	297
Intrinsic	Metabolite	PlasmaBileAcid	GCDCA	Continuous	lld1;300ob	2	1352	0	1055	0	0	0	0	297	0	0	1352	0	0.929515	0	0	0	0	0.996644	0	0	0.114276	1352	0.551306	0.0150575	0	NA	NA	1055	0.581869	0.0178865	0	NA	NA	0	NA	NA	0	NA	NA	0	NA	NA	297
Intrinsic	Metabolite	PlasmaBileAcid	TCDCA	Continuous	lld1;300ob	2	1352	0	1055	0	0	0	0	297	0	0	1352	0	0.929515	0	0	0	0	0.996644	0	0	0.114276	1352	0.0841087	0.00266468	0	NA	NA	1055	0.0910464	0.00309433	0	NA	NA	0	NA	NA	0	NA	NA	0	NA	NA	297
Intrinsic	Metabolite	PlasmaBileAcid	DCA	Continuous	lld1;300ob	2	1352	0	1055	0	0	0	0	297	0	0	1352	0	0.929515	0	0	0	0	0.996644	0	0	0.114276	1352	0.357143	0.00937126	0	NA	NA	1055	0.366136	0.0106588	0	NA	NA	0	NA	NA	0	NA	NA	0	NA	NA	297
Intrinsic	Metabolite	PlasmaBileAcid	GDCA	Continuous	lld1;300ob	2	1352	0	1055	0	0	0	0	297	0	0	1352	0	0.929515	0	0	0	0	0.996644	0	0	0.114276	1352	0.226187	0.00820922	0	NA	NA	1055	0.23587	0.00973891	0	NA	NA	0	NA	NA	0	NA	NA	0	NA	NA	297
Intrinsic	Metabolite	PlasmaBileAcid	TDCA	Continuous	lld1;300ob	2	1352	0	1055	0	0	0	0	297	0	0	1352	0	0.929515	0	0	0	0	0.996644	0	0	0.114276	1352	0.0429334	0.00163584	0	NA	NA	1055	0.0470483	0.00189489	0	NA	NA	0	NA	NA	0	NA	NA	0	NA	NA	297
Intrinsic	Metabolite	PlasmaBileAcid	LCA	Continuous	lld1;300ob	2	1352	0	1055	0	0	0	0	297	0	0	1352	0	0.929515	0	0	0	0	0.996644	0	0	0.114276	1352	0.0226945	0.000579058	0	NA	NA	1055	0.0246389	0.000608565	0	NA	NA	0	NA	NA	0	NA	NA	0	NA	NA	297
Intrinsic	Metabolite	PlasmaBileAcid	GLCA	Continuous	lld1;300ob	2	1352	0	1055	0	0	0	0	297	0	0	1352	0	0.929515	0	0	0	0	0.996644	0	0	0.114276	1352	0.0135133	0.000548914	0	NA	NA	1055	0.014945	0.000638188	0	NA	NA	0	NA	NA	0	NA	NA	0	NA	NA	297
Intrinsic	Metabolite	PlasmaBileAcid	TLCA	Continuous	lld1;300ob	2	1352	0	1055	0	0	0	0	297	0	0	1352	0	0.929515	0	0	0	0	0.996644	0	0	0.114276	1352	0.000585059	0.000112954	0	NA	NA	1055	0.000708057	0.000138409	0	NA	NA	0	NA	NA	0	NA	NA	0	NA	NA	297
Intrinsic	Metabolite	PlasmaBileAcid	UDCA	Continuous	lld1;300ob	2	1352	0	1055	0	0	0	0	297	0	0	1352	0	0.929515	0	0	0	0	0.996644	0	0	0.114276	1352	0.0580703	0.00345788	0	NA	NA	1055	0.0647137	0.00428136	0	NA	NA	0	NA	NA	0	NA	NA	0	NA	NA	297
Intrinsic	Metabolite	PlasmaBileAcid	GUDCA	Continuous	lld1;300ob	2	1352	0	1055	0	0	0	0	297	0	0	1352	0	0.929515	0	0	0	0	0.996644	0	0	0.114276	1352	0.0845436	0.00513816	0	NA	NA	1055	0.0933507	0.00643336	0	NA	NA	0	NA	NA	0	NA	NA	0	NA	NA	297
Intrinsic	Metabolite	PlasmaBileAcid	TUDCA	Continuous	lld1;300ob	2	1352	0	1055	0	0	0	0	297	0	0	1352	0	0.929515	0	0	0	0	0.996644	0	0	0.114276	1352	0.00164941	0.000236491	0	NA	NA	1055	0.00205782	0.000299304	0	NA	NA	0	NA	NA	0	NA	NA	0	NA	NA	297
Intrinsic	Metabolite	PlasmaBileAcid	TotalPrimaryBAs	Continuous	lld1;300ob	2	1352	0	1055	0	0	0	0	297	0	0	1352	0	0.929515	0	0	0	0	0.996644	0	0	0.114276	1352	1.34337	0.0381453	0	NA	NA	1055	1.41454	0.0448145	0	NA	NA	0	NA	NA	0	NA	NA	0	NA	NA	297
Intrinsic	Metabolite	PlasmaBileAcid	TotalSecondaryBAs	Continuous	lld1;300ob	2	1352	0	1055	0	0	0	0	297	0	0	1352	0	0.929515	0	0	0	0	0.996644	0	0	0.114276	1352	0.663056	0.0163955	0	NA	NA	1055	0.689346	0.0188532	0	NA	NA	0	NA	NA	0	NA	NA	0	NA	NA	297
Intrinsic	Metabolite	PlasmaBileAcid	TotalBAs	Continuous	lld1;300ob	2	1352	0	1055	0	0	0	0	297	0	0	1352	0	0.929515	0	0	0	0	0.996644	0	0	0.114276	1352	2.15069	0.0516336	0	NA	NA	1055	2.264	0.0603916	0	NA	NA	0	NA	NA	0	NA	NA	0	NA	NA	297
Intrinsic	Metabolite	PlasmaBileAcid	CAp	Continuous	lld1;300ob	2	1352	0	1055	0	0	0	0	297	0	0	1352	0	0.929515	0	0	0	0	0.996644	0	0	0.114276	1352	0.0841826	0.00249265	0	NA	NA	1055	0.0851912	0.00277467	0	NA	NA	0	NA	NA	0	NA	NA	0	NA	NA	297
Intrinsic	Metabolite	PlasmaBileAcid	GCAp	Continuous	lld1;300ob	2	1352	0	1055	0	0	0	0	297	0	0	1352	0	0.929515	0	0	0	0	0.996644	0	0	0.114276	1352	0.0743121	0.00126338	0	NA	NA	1055	0.0749232	0.00130648	0	NA	NA	0	NA	NA	0	NA	NA	0	NA	NA	297
Intrinsic	Metabolite	PlasmaBileAcid	TCAp	Continuous	lld1;300ob	2	1352	0	1055	0	0	0	0	297	0	0	1352	0	0.929515	0	0	0	0	0.996644	0	0	0.114276	1352	0.0168108	0.000605537	0	NA	NA	1055	0.0184052	0.000663818	0	NA	NA	0	NA	NA	0	NA	NA	0	NA	NA	297
Intrinsic	Metabolite	PlasmaBileAcid	CDCAp	Continuous	lld1;300ob	2	1352	0	1055	0	0	0	0	297	0	0	1352	0	0.929515	0	0	0	0	0.996644	0	0	0.114276	1352	0.108453	0.00244287	0	NA	NA	1055	0.10715	0.00267492	0	NA	NA	0	NA	NA	0	NA	NA	0	NA	NA	297
Intrinsic	Metabolite	PlasmaBileAcid	GCDCAp	Continuous	lld1;300ob	2	1352	0	1055	0	0	0	0	297	0	0	1352	0	0.929515	0	0	0	0	0.996644	0	0	0.114276	1352	0.266278	0.00332648	0	NA	NA	1055	0.26494	0.00367815	0	NA	NA	0	NA	NA	0	NA	NA	0	NA	NA	297
Intrinsic	Metabolite	PlasmaBileAcid	TCDCA_p	Continuous	lld1;300ob	2	1352	0	1055	0	0	0	0	297	0	0	1352	0	0.929515	0	0	0	0	0.996644	0	0	0.114276	1352	0.0436281	0.00103983	0	NA	NA	1055	0.0458183	0.00116336	0	NA	NA	0	NA	NA	0	NA	NA	0	NA	NA	297
Intrinsic	Metabolite	PlasmaBileAcid	DCAp	Continuous	lld1;300ob	2	1352	0	1055	0	0	0	0	297	0	0	1352	0	0.929515	0	0	0	0	0.996644	0	0	0.114276	1352	0.193005	0.0035219	0	NA	NA	1055	0.183797	0.00369267	0	NA	NA	0	NA	NA	0	NA	NA	0	NA	NA	297
Intrinsic	Metabolite	PlasmaBileAcid	GDCAp	Continuous	lld1;300ob	2	1352	0	1055	0	0	0	0	297	0	0	1352	0	0.929515	0	0	0	0	0.996644	0	0	0.114276	1352	0.107651	0.00174876	0	NA	NA	1055	0.105813	0.00193778	0	NA	NA	0	NA	NA	0	NA	NA	0	NA	NA	297
Intrinsic	Metabolite	PlasmaBileAcid	TDCAp	Continuous	lld1;300ob	2	1352	0	1055	0	0	0	0	297	0	0	1352	0	0.929515	0	0	0	0	0.996644	0	0	0.114276	1352	0.0212901	0.000570183	0	NA	NA	1055	0.0231388	0.000636777	0	NA	NA	0	NA	NA	0	NA	NA	0	NA	NA	297
Intrinsic	Metabolite	PlasmaBileAcid	LCAp	Continuous	lld1;300ob	2	1352	0	1055	0	0	0	0	297	0	0	1352	0	0.929515	0	0	0	0	0.996644	0	0	0.114276	1352	0.0140647	0.000430701	0	NA	NA	1055	0.0146749	0.000447137	0	NA	NA	0	NA	NA	0	NA	NA	0	NA	NA	297
Intrinsic	Metabolite	PlasmaBileAcid	GLCAp	Continuous	lld1;300ob	2	1352	0	1055	0	0	0	0	297	0	0	1352	0	0.929515	0	0	0	0	0.996644	0	0	0.114276	1352	0.00701725	0.000315302	0	NA	NA	1055	0.00764918	0.000361347	0	NA	NA	0	NA	NA	0	NA	NA	0	NA	NA	297
Intrinsic	Metabolite	PlasmaBileAcid	TLCAp	Continuous	lld1;300ob	2	1352	0	1055	0	0	0	0	297	0	0	1352	0	0.929515	0	0	0	0	0.996644	0	0	0.114276	1352	0.000164284	3.55583e-05	0	NA	NA	1055	0.000203753	4.49928e-05	0	NA	NA	0	NA	NA	0	NA	NA	0	NA	NA	297
Intrinsic	Metabolite	PlasmaBileAcid	UDCAp	Continuous	lld1;300ob	2	1352	0	1055	0	0	0	0	297	0	0	1352	0	0.929515	0	0	0	0	0.996644	0	0	0.114276	1352	0.024421	0.000793284	0	NA	NA	1055	0.0266273	0.000894324	0	NA	NA	0	NA	NA	0	NA	NA	0	NA	NA	297
Intrinsic	Metabolite	PlasmaBileAcid	GUDCAp	Continuous	lld1;300ob	2	1352	0	1055	0	0	0	0	297	0	0	1352	0	0.929515	0	0	0	0	0.996644	0	0	0.114276	1352	0.0382961	0.000902412	0	NA	NA	1055	0.0411361	0.00100792	0	NA	NA	0	NA	NA	0	NA	NA	0	NA	NA	297
Intrinsic	Metabolite	PlasmaBileAcid	TUDCAp	Continuous	lld1;300ob	2	1352	0	1055	0	0	0	0	297	0	0	1352	0	0.929515	0	0	0	0	0.996644	0	0	0.114276	1352	0.000424539	5.89968e-05	0	NA	NA	1055	0.000531545	7.47555e-05	0	NA	NA	0	NA	NA	0	NA	NA	0	NA	NA	297
Intrinsic	Metabolite	PlasmaBileAcid	SecondaryPrimaryRatio	Continuous	lld1;300ob	2	1352	0	1055	0	0	0	0	297	0	0	1352	0	0.929515	0	0	0	0	0.996644	0	0	0.114276	1352	0.759497	0.0213621	0	NA	NA	1055	0.715213	0.0196097	0	NA	NA	0	NA	NA	0	NA	NA	0	NA	NA	297
Intrinsic	Metabolite	PlasmaBileAcid	CA.CDCA.Ratio	Continuous	lld1;300ob	2	1352	0	1055	0	0	0	0	297	0	0	1352	0	0.929515	0	0	0	0	0.996644	0	0	0.114276	1352	1.33481	0.022508	0	NA	NA	1055	1.29926	0.0232868	0	NA	NA	0	NA	NA	0	NA	NA	0	NA	NA	297
Intrinsic	Metabolite	PlasmaBileAcid	UnconjugatedConjugatedRatio	Continuous	lld1;300ob	2	1352	0	1055	0	0	0	0	297	0	0	1352	0	0.929515	0	0	0	0	0.996644	0	0	0.114276	1352	1.15972	0.0412437	0	NA	NA	1055	1.08699	0.0400609	0	NA	NA	0	NA	NA	0	NA	NA	0	NA	NA	297
Intrinsic	Metabolite	PlasmaBileAcid	CA.DehydroDeconjuRatio	Continuous	lld1;300ob	2	1326	0	1047	0	0	0	0	279	0	0	1326	0	0.922467	0	0	0	0	0.936242	0	0	0.112078	1326	2.7954	0.0837367	0	NA	NA	1047	2.64548	0.0835264	0	NA	NA	0	NA	NA	0	NA	NA	0	NA	NA	279
Intrinsic	Metabolite	PlasmaBileAcid	TaurineGlycineRatio	Continuous	lld1;300ob	2	1351	0	1054	0	0	0	0	297	0	0	1351	0	0.928634	0	0	0	0	0.996644	0	0	0.114192	1351	0.180571	0.00428378	0	NA	NA	1054	0.194913	0.00482173	0	NA	NA	0	NA	NA	0	NA	NA	0	NA	NA	297
Intrinsic	Metabolite	PlasmaTmaoRelated	TMAO	Continuous	lld1;300ob	2	297	0	0	0	0	0	0	297	0	0	297	0	0	0	0	0	0	0.996644	0	0	0.0251035	297	5.1727	0.260747	0	NA	NA	0	NA	NA	0	NA	NA	0	NA	NA	0	NA	NA	0	NA	NA	297
Intrinsic	Metabolite	PlasmaTmaoRelated	Choline	Continuous	lld1;300ob	2	297	0	0	0	0	0	0	297	0	0	297	0	0	0	0	0	0	0.996644	0	0	0.0251035	297	13.8794	0.133602	0	NA	NA	0	NA	NA	0	NA	NA	0	NA	NA	0	NA	NA	0	NA	NA	297
Intrinsic	Metabolite	PlasmaTmaoRelated	Betaine	Continuous	lld1;300ob	2	297	0	0	0	0	0	0	297	0	0	297	0	0	0	0	0	0	0.996644	0	0	0.0251035	297	30.915	0.543131	0	NA	NA	0	NA	NA	0	NA	NA	0	NA	NA	0	NA	NA	0	NA	NA	297
Intrinsic	Metabolite	PlasmaTmaoRelated	GammaButyrobetaine	Continuous	lld1;300ob	2	297	0	0	0	0	0	0	297	0	0	297	0	0	0	0	0	0	0.996644	0	0	0.0251035	297	1.08515	0.0142047	0	NA	NA	0	NA	NA	0	NA	NA	0	NA	NA	0	NA	NA	0	NA	NA	297
Intrinsic	Metabolite	PlasmaTmaoRelated	L.Carnitine	Continuous	lld1	1	0	0	0	0	0	0	0	0	0	0	0	0	0	0	0	0	0	0	0	0	0	0	NA	NA	0	NA	NA	0	NA	NA	0	NA	NA	0	NA	NA	0	NA	NA	0	NA	NA	0
Intrinsic	Metabolite	PlasmaTmaoRelated	L.CarnitineAbs	Continuous	300ob	1	297	0	0	0	0	0	0	297	0	0	297	0	0	0	0	0	0	0.996644	0	0	0.0251035	297	39.4877	0.461588	0	NA	NA	0	NA	NA	0	NA	NA	0	NA	NA	0	NA	NA	0	NA	NA	297
Intrinsic	Metabolite	FecalSCFA	Acetate	Continuous	lld1	1	983	0	983	0	0	0	0	0	0	0	983	0	0.866079	0	0	0	0	0	0	0	0.0830868	983	30.0557	0.422949	0	NA	NA	983	30.0557	0.422949	0	NA	NA	0	NA	NA	0	NA	NA	0	NA	NA	0
Intrinsic	Metabolite	FecalSCFA	Propionate	Continuous	lld1	1	983	0	983	0	0	0	0	0	0	0	983	0	0.866079	0	0	0	0	0	0	0	0.0830868	983	8.98238	0.162207	0	NA	NA	983	8.98238	0.162207	0	NA	NA	0	NA	NA	0	NA	NA	0	NA	NA	0
Intrinsic	Metabolite	FecalSCFA	Butyrate	Continuous	lld1	1	983	0	983	0	0	0	0	0	0	0	983	0	0.866079	0	0	0	0	0	0	0	0.0830868	983	9.1921	0.179243	0	NA	NA	983	9.1921	0.179243	0	NA	NA	0	NA	NA	0	NA	NA	0	NA	NA	0
Intrinsic	Metabolite	FecalSCFA	Valerate	Continuous	lld1	1	983	0	983	0	0	0	0	0	0	0	983	0	0.866079	0	0	0	0	0	0	0	0.0830868	983	1.58919	0.0301973	0	NA	NA	983	1.58919	0.0301973	0	NA	NA	0	NA	NA	0	NA	NA	0	NA	NA	0
Intrinsic	Metabolite	FecalSCFA	Caproate	Continuous	lld1	1	983	0	983	0	0	0	0	0	0	0	983	0	0.866079	0	0	0	0	0	0	0	0.0830868	983	0.608539	0.0241706	0	NA	NA	983	0.608539	0.0241706	0	NA	NA	0	NA	NA	0	NA	NA	0	NA	NA	0
Intrinsic	Metabolite	FecalSCFA	AlphaMethylbutyrateLCMS	Continuous	ibd;lld1	2	649	0	254	0	0	0	0	0	395	0	649	0	0.223789	0	0	0	0	0	0.726103	0	0.0548559	649	95.6503	2.35433	0	NA	NA	254	112.011	3.84349	0	NA	NA	0	NA	NA	0	NA	NA	0	NA	NA	0
Intrinsic	Metabolite	FecalSCFA	AcetateLCMS	Continuous	ibd;lld1	2	665	0	255	0	0	0	0	0	410	0	665	0	0.22467	0	0	0	0	0	0.753676	0	0.0562083	665	2342.13	43.8693	0	NA	NA	255	2484.64	69.0095	0	NA	NA	0	NA	NA	0	NA	NA	0	NA	NA	0
Intrinsic	Metabolite	FecalSCFA	ButyrateLCMS	Continuous	ibd;lld1	2	660	0	255	0	0	0	0	0	405	0	660	0	0.22467	0	0	0	0	0	0.744485	0	0.0557856	660	1069.23	26.3972	0	NA	NA	255	1166.5	41.5407	0	NA	NA	0	NA	NA	0	NA	NA	0	NA	NA	0
Intrinsic	Metabolite	FecalSCFA	HexanoateLCMS	Continuous	ibd;lld1	2	593	0	253	0	0	0	0	0	340	0	593	0	0.222907	0	0	0	0	0	0.625	0	0.0501226	593	74.5905	4.5564	0	NA	NA	253	108.879	8.32289	0	NA	NA	0	NA	NA	0	NA	NA	0	NA	NA	0
Intrinsic	Metabolite	FecalSCFA	IsobutyrateLCMS	Continuous	ibd;lld1	2	652	0	255	0	0	0	0	0	397	0	652	0	0.22467	0	0	0	0	0	0.729779	0	0.0551095	652	132.436	3.10474	0	NA	NA	255	149.264	4.6343	0	NA	NA	0	NA	NA	0	NA	NA	0	NA	NA	0
Intrinsic	Metabolite	FecalSCFA	IsovalerateLCMS	Continuous	ibd;lld1	2	651	0	255	0	0	0	0	0	396	0	651	0	0.22467	0	0	0	0	0	0.727941	0	0.0550249	651	127.908	3.18166	0	NA	NA	255	142.581	4.87243	0	NA	NA	0	NA	NA	0	NA	NA	0	NA	NA	0
Intrinsic	Metabolite	FecalSCFA	PropionateLCMS	Continuous	ibd;lld1	2	662	0	255	0	0	0	0	0	407	0	662	0	0.22467	0	0	0	0	0	0.748162	0	0.0559547	662	955.252	20.0486	0	NA	NA	255	970.588	30.9522	0	NA	NA	0	NA	NA	0	NA	NA	0	NA	NA	0
Intrinsic	Metabolite	FecalSCFA	ValerateLCMS	Continuous	ibd;lld1	2	626	0	255	0	0	0	0	0	371	0	626	0	0.22467	0	0	0	0	0	0.681985	0	0.0529118	626	172.06	5.00631	0	NA	NA	255	206.993	7.1503	0	NA	NA	0	NA	NA	0	NA	NA	0	NA	NA	0
Exposure	Diet	Diet	Vegetarian	Order	lld1;300tzfg;300tzfg	3	0	0	0	0	0	0	0	0	0	0	0	0	0	0	0	0	0	0	0	0	0	0	NA	NA	0	NA	NA	0	NA	NA	0	NA	NA	0	NA	NA	0	NA	NA	0	NA	NA	0
[truncated: 19 more columns]

## Sheet: Table S3_unfiltSNV
Table S3. Information of gut microbial species and statistics of SNVs before filtering
rawSnpNum	SpeciesId	CoreGenomeSize	MutationRateCore	Cohort	commonSnpNum	rareSnpNum
29762	100002	2199947	0.0135285	all	25779	3983
1113	100003	2038887	0.000545886	all	847	266
68961	100008	1228620	0.0561288	all	1	68960
16889	100013	3226649	0.00523422	all	40	16849
95347	100014	3282656	0.0290457	all	55	95292
87429	100016	1821085	0.0480093	all	28	87401
7854	100017	1558013	0.00504104	all	41	7813
31049	100018	2259826	0.0137396	all	17501	13548
4202	100021	1682502	0.00249747	all	0	4202
9868	100022	1596762	0.00618001	all	5829	4039
2296	100026	1446581	0.00158719	all	498	1798
70775	100027	1424069	0.0496991	all	9315	61460
16924	100028	1544222	0.0109596	all	9914	7010
30459	100029	2611131	0.0116651	all	23167	7292
80802	100030	2047369	0.0394663	all	9669	71133
192971	100032	4348257	0.0443789	all	361	192610
36447	100033	1647861	0.0221178	all	27500	8947
15446	100035	2824693	0.0054682	all	118	15328
47103	100036	1446329	0.0325673	all	30212	16891
4079	100038	1792544	0.00227554	all	2875	1204
121079	100039	1656074	0.0731121	all	52473	68606
4763	100041	1935602	0.00246073	all	2705	2058
102102	100043	2161954	0.0472267	all	101	102001
4552	100044	2893617	0.00157312	all	3834	718
15563	100045	1700919	0.00914976	all	11410	4153
137816	100046	1593904	0.0864644	all	42	137774
17941	100052	2331018	0.00769664	all	10	17931
8	100060	1837503	4.35373e-06	all	8	0
55098	100062	2087869	0.0263896	all	41506	13592
59597	100069	1948393	0.0305878	all	48717	10880
23618	100070	1647999	0.0143313	all	2731	20887
44484	100072	1581347	0.0281304	all	24580	19904
5102	100074	2415898	0.00211184	all	3577	1525
3491	100076	2558273	0.00136459	all	2668	823
38885	100077	1951437	0.0199263	all	31674	7211
5541	100078	2135241	0.00259502	all	3199	2342
39298	100080	2590203	0.0151718	all	59	39239
13071	100084	1669897	0.00782743	all	7672	5399
26745	100086	1824331	0.0146602	all	1840	24905
91546	100087	2020235	0.0453145	all	51442	40104
13404	100088	1344143	0.00997215	all	28	13376
103811	100089	2057241	0.0504613	all	72502	31309
36335	100093	4683721	0.00775772	all	3	36332
17	100094	1566261	1.08539e-05	all	0	17
14065	100097	1645766	0.00854617	all	0	14065
21640	100099	2135493	0.0101335	all	16997	4643
56897	100105	2503256	0.0227292	all	40410	16487
41581	100106	2567618	0.0161944	all	2	41579
73420	100107	5047269	0.0145465	all	1	73419
100028	100108	3747841	0.0266895	all	0	100028
61644	100111	2229595	0.0276481	all	7	61637
34139	100113	1327032	0.0257258	all	27367	6772
18994	100117	2272675	0.00835755	all	3	18991
43438	100119	2273600	0.0191054	all	233	43205
61174	100121	3025154	0.0202218	all	42	61132
45116	100122	2061161	0.0218886	all	1	45115
71459	100123	4259045	0.0167782	all	3656	67803
35264	100128	1813715	0.019443	all	18	35246
92285	100133	2182086	0.0422921	all	61219	31066
16674	100136	2088965	0.00798194	all	13334	3340
47146	100138	3049100	0.0154623	all	2864	44282
63777	100139	1959250	0.0325517	all	32184	31593
23399	100140	1704467	0.013728	all	18046	5353
76670	100141	1758758	0.0435933	all	59181	17489
17093	100142	1913964	0.00893068	all	12419	4674
14665	100143	2417671	0.00606576	all	5850	8815
38860	100144	2651263	0.0146572	all	32689	6171
37946	100146	1781384	0.0213014	all	21209	16737
36138	100148	1641015	0.0220217	all	17012	19126
18536	100149	2969554	0.00624201	all	12385	6151
70686	100150	4165396	0.0169698	all	162	70524
148707	100151	2767993	0.0537238	all	167	148540
81993	100153	2084437	0.0393358	all	56809	25184
45569	100154	1996389	0.0228257	all	34060	11509
47285	100155	1652570	0.028613	all	5	47280
41534	100159	2197664	0.0188992	all	17870	23664
40337	100160	1364809	0.0295551	all	100	40237
52191	100161	1335688	0.0390742	all	7	52184
42692	100162	2240007	0.0190589	all	6	42686
60580	100166	1331289	0.0455048	all	11	60569
32986	100169	1804094	0.018284	all	21643	11343
49801	100170	2146515	0.0232009	all	24866	24935
56355	100177	1564008	0.0360324	all	39021	17334
79068	100179	3930765	0.0201152	all	541	78527
102331	100183	2659328	0.03848	all	74697	27634
85083	100185	1543656	0.0551179	all	52965	32118
28895	100186	1499222	0.0192733	all	831	28064
51	100187	1826906	2.79161e-05	all	18	33
28	100189	1669361	1.67729e-05	all	15	13
20128	100190	2071198	0.00971805	all	14493	5635
70346	100193	2113464	0.0332847	all	54651	15695
27948	100194	1862170	0.0150083	all	19766	8182
97856	100195	1547173	0.0632483	all	42213	55643
15296	100196	4062005	0.00376563	all	12666	2630
101171	100199	1362887	0.0742329	all	80353	20818
23257	100200	2406540	0.00966408	all	14255	9002
43615	100201	2717774	0.0160481	all	38406	5209
73100	100203	2362236	0.0309453	all	52533	20567
49410	100204	1732169	0.0285249	all	26941	22469
16438	100205	1849393	0.00888832	all	11440	4998
96451	100206	1749208	0.0551398	all	61728	34723
28637	100208	1674656	0.0171002	all	16974	11663
50164	100209	1928453	0.0260126	all	40254	9910
37578	100211	4556929	0.00824634	all	3	37575
28705	100212	2140562	0.01341	all	20513	8192
61837	100214	1389313	0.044509	all	16875	44962
102670	100215	1749059	0.0587001	all	45556	57114
7272	100217	2304824	0.00315512	all	5213	2059
7978	100218	1560586	0.00511218	all	2	7976
60390	100225	1620849	0.0372583	all	320	60070
64626	100226	1539614	0.0419755	all	470	64156
95562	100230	1477001	0.0647	all	64	95498
20439	100231	2194199	0.00931502	all	14932	5507
60	100232	1301271	4.61088e-05	all	0	60
42896	100233	1663425	0.0257878	all	20647	22249
55172	100235	3589838	0.0153689	all	1	55171
82982	100236	3365037	0.0246601	all	193	82789
4	100238	2448816	1.63344e-06	all	0	4
29696	100240	1747062	0.0169977	all	11	29685
10270	100242	2579170	0.0039819	all	8096	2174
4194	100243	2667754	0.00157211	all	2860	1334
20933	100244	1454948	0.0143875	all	13288	7645
29130	100245	2658830	0.0109559	all	2989	26141
71307	100246	1303621	0.0546992	all	82	71225
154565	100247	1314578	0.117578	all	419	154146
43347	100248	1936599	0.0223831	all	1	43346
13751	100249	1666964	0.00824913	all	9477	4274
50258	100250	2267542	0.0221641	all	36349	13909
2806	100251	1941391	0.00144536	all	1955	851
84787	100252	2063120	0.0410965	all	71299	13488
25609	100253	1326906	0.0192998	all	20343	5266
10812	100254	2627440	0.00411503	all	8433	2379
20107	100255	2000704	0.01005	all	10888	9219
134027	100256	1929751	0.069453	all	861	133166
52723	100259	1902485	0.0277127	all	37867	14856
5	100260	1451447	3.44484e-06	all	0	5
7719	100262	2143463	0.00360118	all	5518	2201
13463	100263	2357209	0.00571142	all	10811	2652
138779	100265	3274268	0.0423847	all	3679	135100
46397	100267	1404516	0.0330342	all	39	46358
102745	100268	1817718	0.0565242	all	49112	53633
2493	100271	2013681	0.00123803	all	2087	406
81004	100272	1715425	0.047221	all	38010	42994
48789	100273	2133405	0.0228691	all	15150	33639
119144	100276	1904754	0.0625509	all	47	119097
73519	100278	1760554	0.041759	all	49737	23782
59631	100280	1813055	0.0328898	all	30498	29133
72404	100282	2201390	0.0328901	all	25080	47324
87551	100289	2081504	0.0420614	all	101	87450
25077	100294	1223208	0.020501	all	3	25074
23282	100296	1410735	0.0165035	all	17	23265
127735	100303	1729390	0.0738613	all	14	127721
388	100320	1506298	0.000257585	all	28	360
12	100323	2161166	5.55256e-06	all	0	12
65958	100332	982428	0.0671377	all	19	65939
42809	100344	1754771	0.0243958	all	41540	1269
66456	100349	1253929	0.0529982	all	88	66368
82291	100353	2138972	0.0384722	all	18	82273
155353	100360	3689140	0.0421109	all	270	155083
89510	100362	1936552	0.0462213	all	63924	25586
66247	100369	1617442	0.0409579	all	50536	15711
37021	100370	2074085	0.0178493	all	23432	13589
52696	100379	1616529	0.0325982	all	25	52671
68645	100389	2192644	0.031307	all	707	67938
60027	100404	1658128	0.0362017	all	51346	8681
31091	100409	1669813	0.0186195	all	26747	4344
98905	100412	1722761	0.0574107	all	27586	71319
131838	100414	1947361	0.0677009	all	290	131548
38847	100418	1708974	0.0227312	all	1	38846
45760	100419	920991	0.0496856	all	67	45693
66406	100429	1246198	0.0532869	all	33301	33105
47320	100431	1348243	0.0350975	all	18638	28682
4921	100434	783496	0.00628082	all	7	4914
40435	100441	2111407	0.0191507	all	16	40419
58663	100451	1431477	0.0409807	all	44751	13912
39398	100453	1551014	0.0254014	all	12	39386
44090	100457	1369007	0.0322058	all	7816	36274
34874	100463	1446589	0.0241077	all	117	34757
46657	100470	2026703	0.0230211	all	6	46651
46343	100475	1234559	0.0375381	all	12611	33732
70458	100478	1138827	0.0618689	all	7	70451
49855	100479	1582010	0.0315137	all	16	49839
67746	100484	1836361	0.0368914	all	21630	46116
37795	100492	1217642	0.0310395	all	6	37789
129625	100502	1696366	0.0764133	all	12	129613
35197	100504	2215578	0.0158861	all	17	35180
32312	100506	1263882	0.0255657	all	6	32306
26160	100510	1966494	0.0133029	all	80	26080
56815	100515	2110788	0.0269165	all	428	56387
91138	100519	1278773	0.0712699	all	43308	47830
19323	100525	1592588	0.0121331	all	82	19241
24770	100528	1093717	0.0226475	all	5	24765
73197	100530	1656056	0.0441996	all	50172	23025
167437	100532	1988575	0.0841995	all	77457	89980
111023	100533	1463453	0.0758637	all	201	110822
133053	100534	1882770	0.0706687	all	43325	89728
36471	100535	1804120	0.0202154	all	30	36441
57200	100537	1945217	0.0294055	all	26928	30272
120576	100538	2974373	0.0405383	all	72781	47795
117201	100539	1625029	0.0721224	all	19308	97893
18462	100558	1703750	0.0108361	all	8	18454
111708	100561	1949463	0.0573019	all	33625	78083
38079	100562	2224455	0.0171184	all	21443	16636
133623	100567	1425521	0.0937363	all	15	133608
111704	100568	2139889	0.0522008	all	23	111681
66727	100575	3514865	0.0189842	all	56278	10449
16700	100584	2126346	0.00785385	all	928	15772
162737	100600	1817605	0.0895338	all	59941	102796
83500	100602	1413340	0.0590799	all	22678	60822
21689	100606	2021886	0.0107271	all	11955	9734
10392	100619	2113967	0.00491588	all	1	10391
78794	100622	1256754	0.0626964	all	114	78680
113617	100631	1803623	0.0629938	all	14318	99299
88370	100636	1839929	0.048029	all	1553	86817
81031	100639	1610792	0.0503051	all	32	80999
57601	100644	1956769	0.0294368	all	28192	29409
50034	100646	1545766	0.0323684	all	32395	17639
80	100648	1478319	5.41155e-05	all	3	77
66375	100651	1732763	0.0383059	all	39804	26571
107289	100652	2025520	0.0529686	all	124	107165
37067	100653	2078406	0.0178343	all	21874	15193
16672	100655	1357863	0.0122781	all	720	15952
78929	100664	1456415	0.054194	all	1	78928
126699	100667	1648297	0.0768666	all	68098	58601
59431	100668	1444585	0.0411405	all	47595	11836
88693	100669	1871218	0.0473985	all	31756	56937
39733	100671	1548441	0.02566	all	11	39722
30403	100672	1878680	0.0161832	all	8599	21804
69170	100690	1950408	0.0354644	all	5053	64117
72737	100692	1827509	0.0398012	all	43	72694
59960	100695	2068222	0.0289911	all	28166	31794
73285	100696	2357817	0.0310817	all	28365	44920
183488	100700	2278070	0.0805454	all	43977	139511
113767	100701	1925548	0.0590829	all	6462	107305
69973	100707	1888027	0.0370614	all	17596	52377
38126	100714	920140	0.041435	all	60	38066
61362	100715	1541166	0.0398153	all	8386	52976
152411	100722	1664745	0.0915522	all	109	152302
70235	100723	1727825	0.0406494	all	49724	20511
5159	100725	1229716	0.00419528	all	1711	3448
158187	100726	1398239	0.113133	all	514	157673
98012	100730	1554246	0.0630608	all	78172	19840
83498	100734	1348751	0.0619076	all	41623	41875
32327	100740	1972562	0.0163883	all	4	32323
54420	100741	1499764	0.0362857	all	1768	52652
44629	100742	1489116	0.0299701	all	11	44618
48315	100743	1561641	0.0309386	all	32640	15675
169020	100760	1791314	0.0943553	all	35	168985
87296	100773	1536691	0.0568078	all	46508	40788
94835	100779	1720096	0.0551336	all	45	94790
32738	100781	2573527	0.0127211	all	23	32715
106049	100782	1411881	0.0751119	all	20	106029
30137	100784	945573	0.0318717	all	58	30079
45375	100796	2156014	0.0210458	all	0	45375
66035	100810	1679621	0.0393154	all	9	66026
97860	100836	1351226	0.0724231	all	54482	43378
31950	100839	2195036	0.0145556	all	14437	17513
27903	100847	1730883	0.0161207	all	5	27898
89809	100850	1357086	0.0661778	all	4	89805
30389	100864	1866191	0.016284	all	98	30291
23990	100870	2614538	0.00917562	all	13	23977
174605	100872	1885218	0.0926179	all	23	174582
27108	100873	1610660	0.0168304	all	0	27108
39731	100875	1607030	0.0247232	all	10004	29727
76425	100877	1380234	0.055371	all	35083	41342
1	100878	1608106	6.2185e-07	all	0	1
10846	100884	1589748	0.00682246	all	1920	8926
29827	100887	886395	0.0336498	all	19	29808
46087	100901	1657416	0.0278065	all	73	46014
38569	100902	3334945	0.0115651	all	13	38556
65330	100909	2082837	0.0313659	all	218	65112
15	100912	1492054	1.00533e-05	all	0	15
24301	100918	1906980	0.0127432	all	0	24301
30851	100933	1213279	0.0254278	all	24495	6356
33941	100939	1669790	0.0203265	all	136	33805
135559	100941	1840107	0.0736691	all	48	135511
41297	100956	2194533	0.0188181	all	13	41284
19238	100968	1750660	0.010989	all	0	19238
57103	100974	1002456	0.0569631	all	6	57097
74	100979	1295290	5.71301e-05	all	0	74
102483	100980	1399136	0.0732473	all	145	102338
66951	100989	2709501	0.0247097	all	26	66925
77016	101001	1958742	0.0393191	all	40	76976
35310	101021	1897507	0.0186086	all	23609	11701
112359	101029	1544294	0.0727575	all	65535	46824
83458	101057	1492232	0.0559283	all	46451	37007
81575	101059	1531757	0.0532558	all	3	81572
20809	101060	1674039	0.0124304	all	7890	12919
21601	101065	2648677	0.00815539	all	24	21577
36890	101068	1211021	0.0304619	all	617	36273
22595	101072	1602849	0.0140968	all	38	22557
41981	101076	2415422	0.0173804	all	51	41930
25391	101077	1401758	0.0181137	all	0	25391
123451	101085	1652650	0.0746988	all	13071	110380
44	101088	1412485	3.11508e-05	all	0	44
100808	101097	2137307	0.0471659	all	3600	97208
22878	101109	1939940	0.0117931	all	157	22721
295	101112	1482448	0.000198995	all	0	295
50301	101116	1807801	0.0278244	all	90	50211
105800	101120	1504687	0.0703136	all	46169	59631
87334	101132	1928541	0.045285	all	499	86835
54729	101136	1555448	0.0351854	all	31436	23293
66797	101146	1139560	0.0586165	all	90	66707
102506	101151	1481832	0.0691752	all	87942	14564
94441	101156	2514395	0.0375601	all	39815	54626
79221	101157	1818159	0.0435721	all	48085	31136
30587	101160	1765283	0.017327	all	7212	23375
57601	101167	1256237	0.045852	all	23937	33664
139491	101168	1336494	0.104371	all	52259	87232
26148	101176	1360803	0.0192151	all	123	26025
33945	101184	902734	0.0376024	all	20	33925
52215	101186	2100803	0.0248548	all	16819	35396
62	101188	1435968	4.31764e-05	all	7	55
96617	101191	1785523	0.0541113	all	80594	16023
52723	101202	1905711	0.0276658	all	52	52671
74145	101211	1601717	0.0462909	all	3	74142
114430	101230	1469796	0.0778543	all	1199	113231
72823	101244	1387525	0.0524841	all	40953	31870
49797	101246	1977066	0.0251873	all	32016	17781
29526	101247	2026856	0.0145674	all	69	29457
17566	101248	1539174	0.0114126	all	12	17554
45876	101255	1624654	0.0282374	all	37105	8771
25379	101258	1719708	0.0147577	all	273	25106
50139	101289	1475328	0.033985	all	403	49736
1205	101292	1495103	0.000805965	all	539	666
108193	101293	2258856	0.0478973	all	3	108190
5127	101294	1480169	0.00346379	all	4048	1079
124946	101295	2149123	0.0581381	all	387	124559
58392	101296	1501576	0.0388871	all	4	58388
32580	101297	1522844	0.0213942	all	1	32579
6099	101300	1580754	0.00385829	all	4854	1245
64502	101301	1289031	0.0500391	all	35	64467
2807	101302	1734689	0.00161816	all	2610	197
106278	101303	2067184	0.051412	all	70327	35951
50528	101304	1652815	0.0305709	all	9929	40599
26077	101306	2264315	0.0115165	all	14470	11607
24300	101308	1267590	0.0191702	all	140	24160
16809	101309	3020064	0.00556578	all	8	16801
11816	101310	1578162	0.00748719	all	8039	3777
10659	101313	2466724	0.00432112	all	8429	2230
63750	101314	2059057	0.0309608	all	336	63414
13058	101315	1691791	0.00771845	all	9087	3971
99402	101316	1400111	0.0709958	all	40037	59365
44107	101319	1683361	0.0262017	all	31694	12413
92410	101321	1697105	0.0544516	all	63840	28570
88333	101326	1568686	0.0563102	all	19	88314
67445	101327	2538878	0.0265649	all	7	67438
89676	101328	3132327	0.0286292	all	36	89640
79132	101334	1499860	0.0527596	all	16476	62656
103739	101336	1360593	0.0762454	all	6	103733
10347	101337	3820306	0.00270842	all	7969	2378
967	101338	1916779	0.000504492	all	742	225
133450	101342	1528362	0.0873157	all	5724	127726
2754	101345	3464893	0.00079483	all	2312	442
2812	101346	2966042	0.000948065	all	1920	892
55691	101349	1563797	0.0356127	all	32328	23363
88033	101352	3227794	0.0272734	all	8	88025
63433	101354	1854389	0.034207	all	5031	58402
107753	101356	1610301	0.0669148	all	7878	99875
80028	101359	2682043	0.0298384	all	59143	20885
93245	101361	1986753	0.0469334	all	65765	27480
121115	101362	1371450	0.0883116	all	1720	119395
78502	101367	3406851	0.0230424	all	132	78370
68012	101369	1124976	0.0604564	all	1084	66928
50719	101372	2829892	0.0179226	all	9	50710
9520	101373	1662771	0.00572538	all	9	9511
2557	101374	1851226	0.00138125	all	1449	1108
64483	101375	1667166	0.0386782	all	36361	28122
626	101378	3642188	0.000171875	all	444	182
88898	101379	2018283	0.0440464	all	12054	76844
7436	101380	1778235	0.00418167	all	5538	1898
104297	101382	1606868	0.064907	all	276	104021
54115	101385	2089253	0.0259016	all	31497	22618
43808	101386	3351386	0.0130716	all	20347	23461
130772	101387	1451114	0.0901184	all	99489	31283
33667	101389	2242757	0.0150114	all	25	33642
111856	101391	2701993	0.0413976	all	69802	42054
159138	101392	1411120	0.112774	all	4	159134
174426	101393	3840909	0.0454127	all	1	174425
130225	101396	3187034	0.0408609	all	50547	79678
87008	101397	1491333	0.0583424	all	23	86985
52230	101398	2353856	0.0221891	all	20	52210
67360	101399	2908047	0.0231633	all	19	67341
21556	101400	2804959	0.00768496	all	7788	13768
46564	101401	1738328	0.0267867	all	5	46559
58167	101402	2706755	0.0214896	all	114	58053
33391	101410	1661468	0.0200973	all	18613	14778
147570	101413	1622534	0.0909503	all	646	146924
10567	101415	2079999	0.00508029	all	7746	2821
47882	101420	2275907	0.0210386	all	32804	15078
65370	101421	2708767	0.0241328	all	9	65361
64435	101429	2123205	0.030348	all	47933	16502
85698	101431	1425604	0.0601135	all	3	85695
26755	101433	3675235	0.00727981	all	17080	9675
44133	101439	1875748	0.0235282	all	23556	20577
13876	101440	1742819	0.00796181	all	2	13874
94436	101444	1376889	0.0685865	all	36920	57516
35113	101446	2088790	0.0168102	all	38	35075
14778	101448	1832610	0.00806391	all	28	14750
68072	101455	1332527	0.0510849	all	15160	52912
45360	101456	1972798	0.0229927	all	35029	10331
168065	101489	4215391	0.0398694	all	22606	145459
15592	101490	1410374	0.0110552	all	4848	10744
54278	101493	4000650	0.0135673	all	26105	28173
5033	101494	1730487	0.00290843	all	6	5027
25399	101500	1710481	0.014849	all	17680	7719
93621	101521	950156	0.0985322	all	6	93615
14161	101522	1932931	0.00732618	all	26	14135
23691	101531	2218979	0.0106765	all	8114	15577
45628	101551	3094310	0.0147458	all	5	45623
72266	101556	1630589	0.044319	all	41	72225
22621	101559	1302071	0.0173731	all	2	22619
55722	101561	1779015	0.0313218	all	18	55704
29896	101565	1570580	0.019035	all	18549	11347
25598	101589	1696912	0.015085	all	21	25577
55676	101609	2545050	0.0218762	all	57	55619
14097	101619	2260235	0.00623696	all	35	14062
51031	101627	1673501	0.0304936	all	28340	22691
53099	101630	1808754	0.0293567	all	22	53077
175281	101633	1858846	0.0942956	all	36714	138567
108129	101637	1950745	0.0554296	all	3061	105068
32229	101655	2823405	0.0114149	all	21288	10941
5412	101673	1973715	0.00274204	all	2	5410
19465	101687	1672279	0.0116398	all	118	19347
99319	101689	4043670	0.0245616	all	221	99098
54426	101694	2335201	0.0233068	all	20	54406
84319	101695	1719061	0.0490495	all	21	84298
8417	101696	3298619	0.00255167	all	0	8417
95182	101704	1830624	0.0519943	all	52724	42458
110594	101705	4007061	0.0275998	all	5	110589
26815	101711	1412942	0.0189781	all	18795	8020
92565	101714	1902550	0.0486531	all	60122	32443
10138	101729	1901336	0.00533204	all	20	10118
53198	101737	1488659	0.0357355	all	30622	22576
53949	101745	2233351	0.0241561	all	320	53629
32717	101747	1478048	0.0221353	all	38	32679
44021	101752	963201	0.0457028	all	15	44006
32534	101756	1653649	0.0196741	all	70	32464
34225	101757	1505364	0.0227354	all	19081	15144
29778	101762	1351134	0.0220393	all	1	29777
96975	101763	1707719	0.0567863	all	35236	61739
80023	101769	1853089	0.0431836	all	182	79841
78833	101770	1643396	0.0479696	all	36169	42664
37700	101789	2345600	0.0160726	all	30	37670
43104	101819	1609687	0.0267779	all	55	43049
114980	101820	1798418	0.063934	all	77	114903
7345	101830	2215053	0.00331595	all	5949	1396
56982	101831	2157615	0.0264097	all	19793	37189
113067	101835	2333908	0.0484454	all	82	112985
70807	101848	1855093	0.038169	all	38955	31852
90280	101855	2052138	0.0439931	all	15807	74473
92777	101866	1681958	0.0551601	all	59790	32987
91290	101887	1964061	0.0464802	all	93	91197
21597	101908	1974853	0.010936	all	2	21595
18094	101919	1616758	0.0111915	all	2863	15231
93671	101937	1685657	0.0555694	all	17	93654
95902	101938	1876033	0.0511196	all	36	95866
36974	101940	1631404	0.0226639	all	20561	16413
9521	101946	801616	0.0118773	all	4	9517
129520	101948	2245340	0.0576839	all	64	129456
27087	101959	870387	0.0311206	all	53	27034
154427	101963	2134800	0.0723379	all	49882	104545
61985	101975	1842204	0.0336472	all	5539	56446
51156	101985	1382503	0.0370025	all	19	51137
53634	101987	1683762	0.0318537	all	40	53594
114862	102001	1783735	0.0643941	all	44950	69912
28743	102007	2012129	0.0142849	all	18746	9997
74608	102016	1665279	0.0448021	all	640	73968
32704	102021	1524667	0.0214499	all	17735	14969
48200	102040	1511006	0.0318993	all	24833	23367
71632	102056	1903565	0.0376304	all	274	71358
34448	102057	1377864	0.025001	all	27468	6980
73574	102060	1747316	0.0421069	all	50446	23128
162507	102072	1854524	0.0876273	all	82968	79539
233	102079	1855969	0.000125541	all	0	233
85142	102082	1727464	0.0492873	all	695	84447
234	102087	1447920	0.000161611	all	0	234
94180	102101	1547061	0.0608767	all	60942	33238
32065	102104	1432985	0.0223764	all	105	31960
107567	102108	1807954	0.0594965	all	43136	64431
22	102111	1460074	1.50677e-05	all	0	22
161928	102113	1530343	0.105812	all	15056	146872
57174	102121	1453158	0.0393447	all	52	57122
151777	102133	1870523	0.0811415	all	66045	85732
53499	102135	2155630	0.0248183	all	46303	7196
79661	102143	1537069	0.0518266	all	45609	34052
49590	102152	1872322	0.0264858	all	1008	48582
36426	102155	1610289	0.0226208	all	10092	26334
15826	102160	1506583	0.0105046	all	0	15826
17139	102163	1354082	0.0126573	all	11154	5985
22553	102166	819272	0.0275281	all	24	22529
55441	102175	932456	0.059457	all	213	55228
50258	102181	1818113	0.0276429	all	8	50250
27250	102190	1896648	0.0143675	all	20835	6415
13891	102191	1384627	0.0100323	all	8662	5229
29101	102194	2176230	0.0133722	all	30	29071
149410	102218	2093498	0.0713686	all	170	149240
15534	102222	1316139	0.0118027	all	192	15342
52276	102224	1639591	0.0318836	all	455	51821
25294	102228	2282213	0.0110831	all	30	25264
47113	102238	1359088	0.0346652	all	11113	36000
65682	102242	1799657	0.036497	all	19413	46269
38180	102267	5904558	0.00646619	all	23	38157
37214	102268	3682068	0.0101068	all	5	37209
82774	102270	3022194	0.0273887	all	3	82771
2655	102272	1693050	0.00156818	all	1828	827
43858	102274	1727951	0.0253815	all	23286	20572
12284	102279	1688540	0.00727492	all	7647	4637
18174	102281	4072024	0.00446314	all	14460	3714
225006	102282	4017367	0.0560083	all	262	224744
66921	102284	1566049	0.0427324	all	82	66839
143270	102285	1937661	0.0739397	all	74350	68920
49837	102286	1981653	0.0251492	all	34096	15741
76055	102287	1517807	0.0501085	all	52812	23243
68810	102289	1856640	0.0370616	all	6292	62518
35781	102292	1975707	0.0181105	all	25016	10765
34709	102293	1910456	0.0181679	all	26346	8363
78937	102295	1737936	0.04542	all	55979	22958
77991	102297	2196031	0.0355145	all	32098	45893
46177	102298	1924460	0.0239948	all	43178	2999
16975	102302	1349599	0.0125778	all	2527	14448
32903	102303	1531362	0.0214861	all	149	32754
107062	102311	3645154	0.029371	all	1	107061
67688	102316	1081795	0.0625701	all	16	67672
92237	102317	1103299	0.0836011	all	14	92223
100841	102319	1272222	0.0792637	all	33	100808
35	102320	1950825	1.79411e-05	all	0	35
74767	102321	1971802	0.0379181	all	52413	22354
22526	102322	3768450	0.00597752	all	1	22525
71247	102324	1433358	0.0497064	all	24	71223
9334	102327	1839301	0.00507475	all	7641	1693
46961	102328	5008132	0.00937695	all	763	46198
209118	102330	4911834	0.0425743	all	530	208588
25930	102331	4490668	0.0057742	all	3	25927
23723	102335	3808642	0.00622873	all	3	23720
57311	102336	1504203	0.0381006	all	12626	44685
90399	102337	2273824	0.0397564	all	4	90395
37998	102340	2216293	0.0171448	all	30614	7384
105049	102344	3125198	0.0336136	all	1	105048
142000	102346	3043487	0.046657	all	2	141998
25220	102349	1675881	0.0150488	all	23	25197
342230	102350	4095546	0.0835615	all	29	342201
141490	102351	4468206	0.031666	all	13	141477
3328	102355	3152107	0.0010558	all	15	3313
153044	102363	3787101	0.0404119	all	10	153034
143536	102366	4152465	0.0345665	all	2	143534
78553	102369	3518700	0.0223244	all	27	78526
28806	102371	1896906	0.0151858	all	23211	5595
129602	102372	2376361	0.054538	all	325	129277
64643	102378	2520020	0.0256518	all	19	64624
116327	102386	2443513	0.0476065	all	0	116327
43967	102387	1483892	0.0296295	all	14	43953
96730	102388	2317633	0.0417365	all	5	96725
61168	102393	1823255	0.0335488	all	2749	58419
114475	102394	2556726	0.0447741	all	412	114063
2185	102395	1435410	0.00152221	all	1417	768
12299	102396	1789913	0.00687128	all	8653	3646
33398	102397	1500574	0.0222568	all	11341	22057
21880	102399	1741166	0.0125663	all	2	21878
1183	102400	2308848	0.000512377	all	0	1183
170922	102412	1990496	0.085869	all	73169	97753
44521	102422	1465623	0.0303768	all	0	44521
39058	102424	1955979	0.0199685	all	23958	15100
23607	102438	3361075	0.00702365	all	19333	4274
24586	102444	1765057	0.0139293	all	10335	14251
14740	102445	1811241	0.00813807	all	9819	4921
15987	102446	1356672	0.011784	all	1611	14376
22266	102447	1493857	0.014905	all	5	22261
113900	102450	1347829	0.0845063	all	56400	57500
36841	102452	2539497	0.0145072	all	4	36837
50740	102453	2583397	0.0196408	all	35	50705
94508	102454	2295837	0.0411649	all	74930	19578
46974	102455	4060208	0.0115694	all	38677	8297
27535	102456	1090886	0.025241	all	8	27527
1277	102459	1758654	0.000726124	all	14	1263
123780	102460	3985988	0.0310538	all	4	123776
196778	102463	5657664	0.0347808	all	17	196761
26964	102469	1703869	0.0158252	all	6	26958
59152	102470	3650202	0.0162051	all	34567	24585
127571	102473	3565188	0.0357824	all	97041	30530
227	102478	3143104	7.22216e-05	all	208	19
49232	102479	1235734	0.0398403	all	1	49231
115492	102480	1505483	0.0767143	all	83319	32173
47518	102483	2227816	0.0213294	all	700	46818
43269	102485	1504822	0.0287536	all	9	43260
54472	102486	2257660	0.0241276	all	6	54466
7784	102489	2023337	0.00384711	all	3	7781
5863	102492	1798070	0.00326072	all	4356	1507
61312	102494	3760031	0.0163062	all	1	61311
219045	102497	4315598	0.0507566	all	8	219037
178325	102499	3367349	0.0529571	all	5080	173245
241175	102500	4021587	0.0599701	all	10	241165
278912	102504	3852694	0.072394	all	72	278840
99598	102506	3656001	0.0272423	all	77634	21964
94967	102508	3791106	0.0250499	all	0	94967
188073	102509	1398156	0.134515	all	92788	95285
50570	102510	4414468	0.0114555	all	34	50536
82728	102511	4716729	0.0175393	all	20318	62410
160250	102512	3269844	0.0490085	all	5	160245
73013	102514	3099086	0.0235595	all	0	73013
40439	102517	2183091	0.0185237	all	29510	10929
203118	102519	3717589	0.054637	all	116	203002
18406	102520	4368405	0.00421344	all	3	18403
176169	102527	3667053	0.048041	all	27	176142
6255	102528	1776572	0.00352083	all	4730	1525
47930	102530	1848479	0.0259294	all	36856	11074
55340	102538	4352225	0.0127153	all	12681	42659
42969	102540	2530093	0.0169832	all	29362	13607
52966	102544	2315298	0.0228765	all	39137	13829
4527	102545	1505956	0.00300606	all	2538	1989
80956	102547	1521816	0.053197	all	78	80878
3357	102549	3476160	0.000965721	all	2625	732
25521	102552	2218313	0.0115047	all	11944	13577
99587	102556	1856415	0.0536448	all	62039	37548
77034	102558	2414689	0.0319022	all	32	77002
32243	102563	1602999	0.0201142	all	23790	8453
13658	102570	1515048	0.0090149	all	8903	4755
39752	102580	2050332	0.0193881	all	21457	18295
26727	102584	2512347	0.0106383	all	2	26725
135574	102589	1501178	0.0903117	all	62872	72702
20897	102602	1578779	0.0132362	all	12	20885
16447	102607	937694	0.0175398	all	10	16437
35449	102608	1915415	0.0185072	all	24	35425
91262	102609	2215112	0.0411997	all	38454	52808
80728	102612	1448622	0.0557274	all	47058	33670
46386	102616	1527638	0.0303645	all	22771	23615
28544	102617	1501395	0.0190117	all	22300	6244
107	102619	1637173	6.53566e-05	all	63	44
119438	102625	1654772	0.0721779	all	494	118944
2485	102631	1522717	0.00163195	all	0	2485
68286	102633	1984934	0.0344022	all	2156	66130
20245	102670	1729998	0.0117023	all	648	19597
59023	102681	1316513	0.0448328	all	53090	5933
511	102690	1494344	0.000341956	all	16	495
125001	102710	1660274	0.0752894	all	109493	15508
50868	102711	2369971	0.0214636	all	33892	16976
24628	102715	1279094	0.0192543	all	18083	6545
40763	102720	1457142	0.0279746	all	29306	11457
1	102763	1234023	8.10358e-07	all	0	1
2409	102775	1946941	0.00123733	all	38	2371
16	102777	1259446	1.2704e-05	all	0	16
7896	102778	1759125	0.0044886	all	83	7813
39857	102779	2958375	0.0134726	all	11969	27888
16807	102781	1616246	0.0103988	all	14000	2807
63311	102782	1668453	0.0379459	all	349	62962
18313	102783	2070024	0.00884676	all	2	18311
78106	102784	1749612	0.0446419	all	7	78099
18	102786	1295042	1.38992e-05	all	0	18
33	102787	3140805	1.05069e-05	all	0	33
1024	102789	1802438	0.000568119	all	1	1023
58526	102794	1430617	0.0409096	all	36938	21588
44846	102805	1700290	0.0263755	all	64	44782
73305	102813	1094779	0.0669587	all	6	73299
48926	102816	4305230	0.0113643	all	0	48926
115376	102831	1254506	0.0919693	all	55519	59857
22513	102845	2238234	0.0100584	all	190	22323
32532	102873	1488261	0.0218591	all	1	32531
75543	102876	1647062	0.0458653	all	5261	70282
19068	102882	1433604	0.0133007	all	10877	8191
7283	102900	1867038	0.00390083	all	35	7248
85678	102922	1703524	0.0502946	all	40	85638
45386	102926	1530810	0.0296484	all	31232	14154
130482	102930	1625413	0.0802762	all	33789	96693
29955	102933	2506253	0.0119521	all	7	29948
9	102948	2050119	4.38999e-06	all	0	9
104263	102955	1867843	0.05582	all	286	103977
43826	102969	1373542	0.0319073	all	45	43781
63065	102990	1021836	0.0617173	all	237	62828
43178	102993	1781772	0.0242332	all	28664	14514
24051	102994	1829322	0.0131475	all	3	24048
16855	103004	1981093	0.00850793	all	23	16832
1454	103007	1802912	0.000806473	all	19	1435
67016	103017	1666898	0.040204	all	18288	48728
8390	103022	1550796	0.00541012	all	2944	5446
74116	103056	1276579	0.0580583	all	3	74113
83619	103069	1491219	0.0560743	all	87	83532
67137	103074	1941535	0.0345793	all	193	66944
739	103075	1895840	0.000389801	all	2	737
43569	103090	1032995	0.0421774	all	10	43559
75611	103094	2130636	0.0354875	all	69	75542
18489	103097	2789406	0.00662829	all	4	18485
56994	103099	2665167	0.0213848	all	8	56986
2665	103126	1635704	0.00162927	all	115	2550
65745	103135	1838447	0.0357612	all	19	65726
1878	103137	6941631	0.000270542	all	2	1876
15526	103158	2014211	0.00770823	all	5	15521
39259	103166	1668570	0.0235285	all	25721	13538
20461	103186	1770664	0.0115556	all	7	20454
23499	103189	1639627	0.0143319	all	1	23498
56655	103190	1534212	0.0369278	all	6823	49832
43828	103217	1503196	0.0291565	all	25936	17892
3335	103230	1242593	0.0026839	all	0	3335
52694	103237	3596317	0.0146522	all	43824	8870
34107	103272	1695930	0.0201111	all	389	33718
29549	103279	2566627	0.0115128	all	848	28701
95306	103288	1346856	0.0707618	all	35660	59646
70630	103298	1173574	0.0601837	all	3391	67239
41424	103302	1274447	0.0325035	all	8	41416
118871	103306	1832819	0.0648569	all	65200	53671
63910	103307	1296627	0.0492894	all	45	63865
62248	103310	1425671	0.0436622	all	2825	59423
47599	103318	1487096	0.032008	all	25422	22177
16408	103326	1966093	0.00834549	all	72	16336
1550	103331	1769584	0.000875912	all	0	1550
50776	103335	2084697	0.0243565	all	42369	8407
93163	103344	1418387	0.0656824	all	22	93141
34655	103374	1597132	0.0216983	all	10	34645
13839	103383	2641900	0.00523828	all	6	13833
7519	103405	1552933	0.00484181	all	0	7519
139782	103409	1493979	0.0935636	all	69960	69822
101095	103411	1133979	0.0891507	all	15844	85251
2625	103418	1365765	0.001922	all	77	2548
26148	103439	1768396	0.0147863	all	16860	9288
72648	103449	1972405	0.0368322	all	13686	58962
32604	103454	2059504	0.015831	all	4	32600
77015	103456	1617065	0.0476264	all	46062	30953
99290	103457	1393317	0.0712616	all	36	99254
73858	103465	1578878	0.0467788	all	2099	71759
51342	103475	1720122	0.0298479	all	23	51319
54878	103476	1387769	0.039544	all	2	54876
21386	103482	1791361	0.0119384	all	9	21377
81790	103483	2653765	0.0308204	all	58	81732
40643	103486	2175987	0.018678	all	21938	18705
53636	103488	1699211	0.0315652	all	74	53562
79122	103504	1553674	0.0509257	all	16553	62569
57152	103508	1336656	0.0427574	all	26840	30312
39945	103552	2162742	0.0184696	all	96	39849
91744	103656	1729307	0.0530525	all	50186	41558
12420	103681	2340386	0.00530682	all	9904	2516
31344	103682	2242164	0.0139794	all	22005	9339
6895	103683	1537833	0.00448358	all	4121	2774
140191	103684	4266885	0.0328556	all	360	139831
10217	103686	1481129	0.00689812	all	7385	2832
35463	103689	1638916	0.0216381	all	13	35450
29541	103690	1469669	0.0201004	all	2	29539
40357	103691	1595974	0.0252868	all	6	40351
2815	103694	2067771	0.00136137	all	2038	777
37682	103695	1958332	0.0192419	all	23997	13685
33	103696	1639956	2.01225e-05	all	0	33
102150	103697	1834099	0.0556949	all	50711	51439
34383	103702	1885722	0.0182333	all	24214	10169
14687	103703	1541919	0.00952514	all	48	14639
1535	103733	6667252	0.00023023	all	1	1534
752	103734	5051826	0.000148857	all	0	752
146	103736	3374459	4.32662e-05	all	0	146
60102	103740	1240630	0.0484447	all	2	60100
57440	103741	1156895	0.0496501	all	14	57426
6425	103761	4026645	0.00159562	all	0	6425
120316	103794	1671037	0.0720008	all	18	120298
136197	103800	1675340	0.0812951	all	12	136185
78119	103813	1338038	0.0583832	all	5	78114
15858	103815	1578925	0.0100435	all	64	15794
125631	103835	2431194	0.0516746	all	24	125607
40151	103844	1985663	0.0202205	all	14	40137
5654	103852	1757987	0.00321618	all	0	5654
52342	103868	1647508	0.0317704	all	24	52318
132402	103875	2140377	0.0618592	all	86855	45547
145447	103891	2376356	0.0612059	all	100765	44682
12115	103899	1660059	0.00729793	all	6327	5788
22459	103901	1342075	0.0167345	all	2	22457
131070	103912	1771199	0.0740007	all	58	131012
13774	103916	1812571	0.00759915	all	122	13652
90052	103921	1595226	0.0564509	all	38435	51617
82599	103932	1546903	0.0533964	all	253	82346
16072	103937	1783578	0.0090111	all	8265	7807
23383	103940	923038	0.0253327	all	2524	20859
79862	103949	1889351	0.0422695	all	53695	26167
58093	103954	1958502	0.029662	all	89	58004
90697	103958	2130873	0.0425633	all	29446	61251
48290	103960	1175839	0.0410685	all	72	48218
40557	103961	1672209	0.0242535	all	14428	26129
35922	103966	1629007	0.0220515	all	25972	9950
91816	103967	1625293	0.056492	all	57404	34412
116840	103971	1202379	0.097174	all	65843	50997
24273	103972	1522464	0.0159432	all	29	24244
80062	103973	1579424	0.0506906	all	62094	17968
19999	103987	2374939	0.00842085	all	90	19909
92080	103990	1466106	0.0628058	all	46273	45807
127150	103992	2478316	0.051305	all	39	127111
54179	103998	1190090	0.0455251	all	43	54136
92760	104006	2008284	0.0461887	all	1818	90942
37141	104014	874639	0.0424644	all	53	37088
62847	104016	1402357	0.0448153	all	41333	21514
2	104018	1605980	1.24535e-06	all	0	2
148147	104019	2048333	0.0723256	all	119	148028
60547	104036	2014908	0.0300495	all	136	60411
11418	104038	834317	0.0136854	all	25	11393
168017	104041	1331787	0.126159	all	96455	71562
119589	104052	1983255	0.0602994	all	78163	41426
55563	104055	1874595	0.02964	all	1691	53872
30048	104070	1558570	0.0192792	all	8	30040
57242	104081	1698961	0.0336924	all	34273	22969
3378	104083	1296827	0.00260482	all	1858	1520
49769	104086	771414	0.0645166	all	807	48962
149202	104088	2237822	0.0666729	all	117233	31969
46607	104099	1607962	0.0289851	all	50	46557
67019	104113	1722798	0.0389013	all	40981	26038
75901	104114	1991463	0.0381132	all	57061	18840
52263	104115	1455814	0.0358995	all	13	52250
32512	104117	862859	0.0376794	all	20649	11863
74444	104129	1735756	0.0428885	all	53560	20884
81051	104137	1843588	0.0439637	all	61164	19887
80278	104138	1332406	0.0602504	all	39978	40300
102054	104145	1732085	0.0589197	all	59075	42979
52281	104150	2673184	0.0195576	all	1863	50418
63943	104158	1387511	0.0460847	all	40913	23030
22994	104162	835336	0.0275266	all	25	22969
63260	104163	1667151	0.037945	all	51595	11665
61835	104165	1336042	0.0462822	all	39464	22371
39954	104194	1379620	0.0289601	all	114	39840
33884	104196	1380254	0.0245491	all	25148	8736
81503	104200	1440933	0.0565627	all	1084	80419
116692	104205	1342157	0.0869436	all	23	116669
63714	104207	1900636	0.0335225	all	14592	49122
33038	104221	1552743	0.0212772	all	25192	7846
35948	104234	1659603	0.0216606	all	1190	34758
27278	104236	1614084	0.0169	all	18257	9021
68218	104245	1351201	0.0504869	all	45162	23056
66562	104248	1587989	0.0419159	all	49099	17463
32444	104250	1970497	0.0164649	all	21924	10520
67041	104252	1614918	0.0415136	all	52514	14527
18031	104253	1730554	0.0104192	all	24	18007
53294	104254	931345	0.0572226	all	333	52961
51899	104256	1749417	0.0296665	all	15705	36194
37517	104262	1536473	0.0244176	all	21763	15754
42340	104267	1699757	0.0249094	all	0	42340
43776	104271	2126153	0.0205893	all	205	43571
36309	104275	1522315	0.0238512	all	17043	19266
120425	104282	1697007	0.0709632	all	171	120254
5586	104284	1576391	0.00354354	all	856	4730
106825	104289	1271766	0.0839974	all	15	106810
20183	104296	1828450	0.0110383	all	13908	6275
53993	104308	1374943	0.0392693	all	13746	40247
19728	104317	1969749	0.0100155	all	10915	8813
41788	104323	1636733	0.0255313	all	26382	15406
155428	104329	1857392	0.0836808	all	73812	81616
128312	104337	1406867	0.0912041	all	46367	81945
66827	104339	1134203	0.0589198	all	19	66808
34898	104341	2055125	0.016981	all	29695	5203
13119	104345	1383411	0.00948308	all	9369	3750
30433	104351	1813094	0.0167851	all	1	30432
55598	104352	863327	0.0643997	all	166	55432
103975	104369	2151621	0.048324	all	313	103662
37508	104379	886021	0.0423331	all	1218	36290
51520	104385	2092993	0.0246155	all	14494	37026
33456	104388	1633828	0.0204771	all	25144	8312
34014	104389	914734	0.0371846	all	44	33970
145968	104390	1874248	0.0778808	all	66329	79639
118446	104392	1410638	0.0839663	all	3856	114590
8414	104397	1829739	0.00459847	all	5	8409
182816	104402	1800227	0.101552	all	19344	163472
26479	104404	2184315	0.0121223	all	6	26473
41342	104409	1154893	0.0357973	all	313	41029
50963	104425	1087173	0.0468766	all	17	50946
50414	104426	774051	0.0651301	all	13	50401
105140	104431	2450083	0.0429128	all	70485	34655
28038	104447	1007339	0.0278337	all	24	28014
31258	104451	1289098	0.024248	all	18226	13032
53628	104463	1608798	0.0333342	all	42220	11408
128495	104468	1904030	0.0674858	all	45	128450
234312	104474	1953619	0.119937	all	80004	154308
29074	104487	1623119	0.0179124	all	19264	9810
119312	104490	2570942	0.0464079	all	35	119277
88262	104491	1804001	0.0489257	all	33176	55086
60028	104492	1171306	0.0512488	all	55	59973
33294	104498	1455833	0.0228694	all	12305	20989
59542	104501	2171933	0.0274143	all	49	59493
27603	104507	935050	0.0295203	all	66	27537
10763	104526	1632686	0.0065922	all	6529	4234
55641	104533	1465855	0.0379581	all	46036	9605
69171	104544	1930993	0.0358215	all	10429	58742
77840	104557	1803013	0.0431722	all	45723	32117
63173	104593	1945510	0.0324712	all	40279	22894
53520	104600	1468283	0.0364507	all	15364	38156
17765	104601	843557	0.0210596	all	1	17764
54218	104612	2089963	0.0259421	all	153	54065
100515	104632	2207261	0.0455383	all	336	100179
14552	104637	1327558	0.0109615	all	0	14552
53166	104639	1531462	0.0347158	all	25634	27532
89720	104643	1673716	0.0536053	all	13657	76063
114177	104644	1835015	0.0622213	all	80798	33379

## Sheet: Table S4_filtSNV
Table S4. Information of gut microbial species and statistics of SNVs after filtering
Species ID	Reference Genome Size	No of Genomes	Core Genome Size	Genic Region Size	No of SNP Clusters	Kingdom	Phylum	Class	Order	Family	Genus	Species	Name	NameID	CommonSnpN.all	CommonSnpN.dmp	CommonSnpN.lld1	CommonSnpN.lld2_apk	CommonSnpN.lld2_fsk	CommonSnpN.500fg_apk	CommonSnpN.500fg_fsk	CommonSnpN.300ob	CommonSnpN.ibd	CommonSnpN.300tzfg	CommonSnpRate.all	CommonSnpRate.dmp	CommonSnpRate.lld1	CommonSnpRate.lld2_apk	CommonSnpRate.lld2_fsk	CommonSnpRate.500fg_apk	CommonSnpRate.500fg_fsk	CommonSnpRate.300ob	CommonSnpRate.ibd	CommonSnpRate.300tzfg	AvailableCohortNumber	AvailableCohort
100002	4546499	134	2199947	3912330	20046	d__Bacteria	Firmicutes_A	c__Clostridia	o__Lachnospirales	f__Lachnospiraceae	g__Blautia_A	s__GCA_900066165.1	s__GCA_900066165.1	s__GCA_900066165.1:100002	25779	18667	22652	22855	19421	22331	21507	22469	22251	20311	0.011718	0.0084852	0.0102966	0.0103889	0.00882794	0.0101507	0.00977614	0.0102134	0.0101143	0.0092325	6	dmp;lld1;lld2_apk;lld2_fsk;500fg_apk;500fg_fsk;300ob;ibd;300tzfg
100018	3285306	236	2259826	2875584	14881	d__Bacteria	Firmicutes_A	c__Clostridia	o__Lachnospirales	f__Lachnospiraceae	g__Coprococcus	s__Coprococcus eutactus	s__Coprococcus eutactus	s__Coprococcus eutactus:100018	17498	NA	NA	NA	NA	NA	NA	NA	NA	17498	0.00774307	NA	NA	NA	NA	NA	NA	NA	NA	0.00774307	0	300tzfg
100022	3080849	432	1596762	2656233	11066	d__Bacteria	Firmicutes_A	c__Clostridia	o__Oscillospirales	f__Ruminococcaceae	g__Faecalibacterium	s__Faecalibacterium prausnitzii_C	s__Faecalibacterium prausnitzii_C	s__Faecalibacterium prausnitzii_C:100022	5829	3891	3880	3857	3835	4084	3981	3901	4055	3876	0.00365051	0.00243681	0.00242992	0.00241551	0.00240174	0.00255768	0.00249317	0.00244307	0.00253951	0.00242741	6	dmp;lld1;lld2_apk;lld2_fsk;500fg_apk;500fg_fsk;300ob;ibd;300tzfg
100027	2322924	88	1424069	1985388	10562	d__Bacteria	Firmicutes_C	c__Negativicutes	o__Selenomonadales	f__Selenomonadaceae	g__Mitsuokella	s__Mitsuokella jalaludinii	s__Mitsuokella jalaludinii	s__Mitsuokella jalaludinii:100027	9306	NA	NA	NA	2587	NA	NA	NA	NA	7234	0.0065348	NA	NA	NA	0.00181663	NA	NA	NA	NA	0.00507981	1	lld2_fsk;300tzfg
100028	2459729	77	1544222	2180784	6847	d__Bacteria	Firmicutes_A	c__Clostridia	o__Lachnospirales	f__Lachnospiraceae	g__Anaerostipes	s__Anaerostipes hadrus_A	s__Anaerostipes hadrus_A	s__Anaerostipes hadrus_A:100028	9914	NA	7362	8206	NA	7184	5429	6522	6690	3671	0.00642006	NA	0.00476745	0.005314	NA	0.00465218	0.00351569	0.00422349	0.00433228	0.00237725	4	lld1;lld2_apk;500fg_apk;500fg_fsk;300ob;ibd;300tzfg
100029	4892401	21	2611131	4378419	4816	d__Bacteria	Bacteroidota	c__Bacteroidia	o__Bacteroidales	f__Bacteroidaceae	g__Bacteroides	s__Bacteroides finegoldii	s__Bacteroides finegoldii	s__Bacteroides finegoldii:100029	23153	18674	NA	11855	19458	NA	21315	9940	NA	NA	0.00886704	0.00715169	NA	0.00454018	0.00745194	NA	0.00816313	0.00380678	NA	NA	4	dmp;lld2_apk;lld2_fsk;500fg_fsk;300ob
100030	3027291	74	2047369	2637855	8649	d__Bacteria	Firmicutes_A	c__Clostridia	o__Lachnospirales	f__Lachnospiraceae	g__CAG-603	s__GCA_900066105.1	s__GCA_900066105.1	s__GCA_900066105.1:100030	9661	NA	NA	NA	NA	NA	NA	NA	NA	9661	0.00471874	NA	NA	NA	NA	NA	NA	NA	NA	0.00471874	0	300tzfg
100033	3276770	637	1647861	2777172	13015	d__Bacteria	Firmicutes_A	c__Clostridia	o__CAG-41	f__UBA1381	g__CAG-41	s__CAG-41 sp1	s__CAG-41 sp1	s__CAG-41 sp1:100033	27500	5845	19036	19165	5209	18959	18067	19100	19009	21107	0.0166883	0.00354702	0.0115519	0.0116302	0.00316107	0.0115052	0.0109639	0.0115908	0.0115356	0.0128087	6	dmp;lld1;lld2_apk;lld2_fsk;500fg_apk;500fg_fsk;300ob;ibd;300tzfg
100036	2416064	257	1446329	2060214	8500	d__Bacteria	Firmicutes_A	c__Clostridia	o__Oscillospirales	f__DTU089	g__GCA-900066995	s__GCA_900066995.1	s__GCA_900066995.1	s__GCA_900066995.1:100036	30205	NA	NA	5292	NA	NA	NA	NA	NA	29011	0.0208839	NA	NA	0.00365892	NA	NA	NA	NA	NA	0.0200584	1	lld2_apk;300tzfg
100038	3033150	243	1792544	2672979	7682	d__Bacteria	Firmicutes_A	c__Clostridia	o__Lachnospirales	f__Lachnospiraceae	g__Dorea	s__Dorea longicatena	s__Dorea longicatena	s__Dorea longicatena:100038	2875	1751	1895	1945	1637	1933	1873	2019	1934	1939	0.00160387	0.000976824	0.00105716	0.00108505	0.000913227	0.00107836	0.00104488	0.00112633	0.00107891	0.0010817	6	dmp;lld1;lld2_apk;lld2_fsk;500fg_apk;500fg_fsk;300ob;ibd;300tzfg
100039	2849356	97	1656074	2486442	13657	d__Bacteria	Firmicutes_A	c__Clostridia	o__Oscillospirales	f__Ruminococcaceae	g__Faecalibacterium	s__Faecalibacterium prausnitzii	s__Faecalibacterium prausnitzii	s__Faecalibacterium prausnitzii:100039	52473	26399	18119	26381	30926	23064	31094	29594	NA	8042	0.0316852	0.0159407	0.0109409	0.0159298	0.0186743	0.0139269	0.0187757	0.01787	NA	0.00485606	6	dmp;lld1;lld2_apk;lld2_fsk;500fg_apk;500fg_fsk;300ob;300tzfg
100041	3999177	842	1935602	3523167	18265	d__Bacteria	Firmicutes_A	c__Clostridia	o__Lachnospirales	f__Lachnospiraceae	g__CAG-65	s__GCA_900066365.1	s__GCA_900066365.1	s__GCA_900066365.1:100041	2685	1636	1684	1676	1675	1646	1668	1731	NA	2144	0.00138717	0.000845215	0.000870014	0.00086588	0.000865364	0.000850381	0.000861747	0.000894295	NA	0.00110767	6	dmp;lld1;lld2_apk;lld2_fsk;500fg_apk;500fg_fsk;300ob;300tzfg
100044	4721275	997	2893617	4220559	11354	d__Bacteria	Bacteroidota	c__Bacteroidia	o__Bacteroidales	f__Tannerellaceae	g__Parabacteroides	s__Parabacteroides merdae	s__Parabacteroides merdae	s__Parabacteroides merdae:100044	3834	3289	3214	3145	3235	3247	3258	3268	3130	3041	0.00132499	0.00113664	0.00111072	0.00108688	0.00111798	0.00112213	0.00112593	0.00112938	0.00108169	0.00105093	6	dmp;lld1;lld2_apk;lld2_fsk;500fg_apk;500fg_fsk;300ob;ibd;300tzfg
100045	3376566	758	1700919	2871546	9165	d__Bacteria	Firmicutes	c__Bacilli	o__Erysipelotrichales	f__Erysipelatoclostridiaceae	g__Erysipelatoclostridium	s__GCF_000752095.2	s__GCF_000752095.2	s__GCF_000752095.2:100045	11393	NA	7847	8432	NA	8113	7164	9195	8685	5897	0.00669814	NA	0.00461339	0.00495732	NA	0.00476977	0.00421184	0.0054059	0.00510606	0.00346695	4	lld1;lld2_apk;500fg_apk;500fg_fsk;300ob;ibd;300tzfg
100062	3057367	48	2087869	2555931	7392	d__Bacteria	Firmicutes_A	c__Clostridia	o__Peptostreptococcales	f__Peptostreptococcaceae	g__Intestinibacter	s__Intestinibacter bartlettii	s__Intestinibacter bartlettii	s__Intestinibacter bartlettii:100062	41504	NA	33878	34011	NA	31080	NA	31351	34860	21441	0.0198786	NA	0.0162261	0.0162898	NA	0.014886	NA	0.0150158	0.0166964	0.0102693	3	lld1;lld2_apk;500fg_apk;300ob;ibd;300tzfg
100069	3196486	120	1948393	2688273	6178	d__Bacteria	Firmicutes_A	c__Clostridia	o__Oscillospirales	f__DTU089	g__Clostridium_A	s__Clostridium_A leptum	s__Clostridium_A leptum	s__Clostridium_A leptum:100069	48715	15618	42731	42841	9917	33795	35492	40656	22269	NA	0.0250027	0.00801584	0.0219314	0.0219879	0.00508984	0.0173451	0.018216	0.0208664	0.0114294	NA	6	dmp;lld1;lld2_apk;lld2_fsk;500fg_apk;500fg_fsk;300ob;ibd
100070	3815973	53	1647999	3316329	2915	d__Bacteria	Firmicutes_A	c__Clostridia	o__Oscillospirales	f__Oscillospiraceae	g__Clostridium_AJ	s__GCA_900066825.1	s__GCA_900066825.1	s__GCA_900066825.1:100070	2664	1552	NA	NA	1151	NA	2542	NA	NA	NA	0.00161651	0.000941748	NA	NA	0.000698423	NA	0.00154248	NA	NA	NA	3	dmp;lld2_fsk;500fg_fsk
100072	2438702	52	1581347	2137860	7256	d__Bacteria	Firmicutes_A	c__Clostridia	o__Oscillospirales	f__Ruminococcaceae	g__UBA1394	s__GCA_900066845.1	s__GCA_900066845.1	s__GCA_900066845.1:100072	24576	NA	NA	13183	NA	NA	NA	22835	NA	NA	0.0155412	NA	NA	0.00833656	NA	NA	NA	0.0144402	NA	NA	1	lld2_apk;300ob
100074	3423024	1000	2415898	3058848	12822	d__Bacteria	Bacteroidota	c__Bacteroidia	o__Bacteroidales	f__Rikenellaceae	g__Alistipes	s__Alistipes onderdonkii	s__Alistipes onderdonkii	s__Alistipes onderdonkii:100074	3577	2928	2871	2763	2870	2653	2853	2814	3033	2709	0.00148061	0.00121197	0.00118838	0.00114367	0.00118796	0.00109814	0.00118093	0.00116478	0.00125543	0.00112132	6	dmp;lld1;lld2_apk;lld2_fsk;500fg_apk;500fg_fsk;300ob;ibd;300tzfg
100076	4303042	587	2558273	3813444	13875	d__Bacteria	Firmicutes_A	c__Clostridia	o__Lachnospirales	f__Lachnospiraceae	g__Roseburia	s__Roseburia intestinalis	s__Roseburia intestinalis	s__Roseburia intestinalis:100076	2668	2029	2044	2076	2039	2006	1974	2005	2023	2038	0.00104289	0.000793113	0.000798976	0.000811485	0.000797022	0.000784123	0.000771614	0.000783732	0.000790768	0.000796631	6	dmp;lld1;lld2_apk;lld2_fsk;500fg_apk;500fg_fsk;300ob;ibd;300tzfg
100077	3610274	48	1951437	3032448	8565	d__Bacteria	Firmicutes_A	c__Clostridia	o__Lachnospirales	f__Lachnospiraceae	g__Eubacterium_E	s__Eubacterium_E hallii_A	s__Eubacterium_E hallii_A	s__Eubacterium_E hallii_A:100077	31674	NA	23577	25236	NA	22971	NA	26122	23258	24281	0.0162311	NA	0.0120819	0.012932	NA	0.0117713	NA	0.013386	0.0119184	0.0124426	3	lld1;lld2_apk;500fg_apk;300ob;ibd;300tzfg
100078	3035220	963	2135241	2658099	10915	d__Bacteria	Firmicutes_A	c__Clostridia	o__Lachnospirales	f__Lachnospiraceae	g__Lachnospira	s__Lachnospira rogosae	s__Lachnospira rogosae	s__Lachnospira rogosae:100078	3199	1936	1918	2093	1851	2213	2161	2096	1609	2587	0.00149819	0.000906689	0.000898259	0.000980217	0.000866881	0.00103642	0.00101206	0.000981622	0.000753545	0.00121157	6	dmp;lld1;lld2_apk;lld2_fsk;500fg_apk;500fg_fsk;300ob;ibd;300tzfg
100084	2963653	870	1669897	2513535	10533	d__Bacteria	Firmicutes_A	c__Clostridia	o__Oscillospirales	f__Ruminococcaceae	g__Subdoligranulum	s__Subdoligranulum formicilis	s__Subdoligranulum formicilis	s__Subdoligranulum formicilis:100084	7672	4859	4912	4859	4800	5135	5032	4705	4931	3791	0.0045943	0.00290976	0.0029415	0.00290976	0.00287443	0.00307504	0.00301336	0.00281754	0.00295288	0.0022702	6	dmp;lld1;lld2_apk;lld2_fsk;500fg_apk;500fg_fsk;300ob;ibd;300tzfg
100086	3355718	11	1824331	2839989	1052	d__Bacteria	Firmicutes_A	c__Clostridia	o__Oscillospirales	f__Oscillospiraceae	g__Clostridium_AJ	s__	g__Clostridium_AJ	g__Clostridium_AJ:100086	1655	1518	NA	NA	1056	NA	1022	NA	NA	NA	0.000907182	0.000832086	NA	NA	0.000578842	NA	0.000560205	NA	NA	NA	3	dmp;lld2_fsk;500fg_fsk
100087	2956544	113	2020235	2642397	11404	d__Bacteria	Firmicutes_A	c__Clostridia	o__Lachnospirales	f__Lachnospiraceae	g__CAG-81	s__GCA_000435795.1	s__GCA_000435795.1	s__GCA_000435795.1:100087	51409	19022	NA	NA	17722	NA	43419	24289	NA	NA	0.025447	0.00941574	NA	NA	0.00877225	NA	0.0214921	0.0120229	NA	NA	3	dmp;lld2_fsk;500fg_fsk;300ob
100089	2909426	309	2057241	2552259	16707	d__Bacteria	Firmicutes_A	c__Clostridia	o__Oscillospirales	f__Ruminococcaceae	g__CAG-353	s__GCA_900066885.1	s__GCA_900066885.1	s__GCA_900066885.1:100089	72502	27051	NA	16729	28191	NA	11220	NA	NA	59616	0.0352423	0.0131492	NA	0.00813176	0.0137033	NA	0.00545391	NA	NA	0.0289786	4	dmp;lld2_apk;lld2_fsk;500fg_fsk;300tzfg
100099	4431208	315	2135493	3890454	12173	d__Bacteria	Firmicutes_A	c__Clostridia	o__Oscillospirales	f__Oscillospiraceae	g__Flavonifractor	s__Flavonifractor plautii	s__Flavonifractor plautii	s__Flavonifractor plautii:100099	16997	13884	5155	7300	14351	4792	13862	11232	14806	4509	0.00795929	0.00650154	0.00241396	0.00341841	0.00672023	0.00224398	0.00649124	0.00525968	0.00693329	0.00211146	6	dmp;lld1;lld2_apk;lld2_fsk;500fg_apk;500fg_fsk;300ob;ibd;300tzfg
100105	4045484	41	2503256	3680223	6853	d__Bacteria	Bacteroidota	c__Bacteroidia	o__Bacteroidales	f__Bacteroidaceae	g__Bacteroides	s__Bacteroides clarus	s__Bacteroides clarus	s__Bacteroides clarus:100105	40410	30140	NA	9122	30425	2004	34727	15298	NA	NA	0.016143	0.0120403	NA	0.00364405	0.0121542	0.000800557	0.0138727	0.00611124	NA	NA	5	dmp;lld2_apk;lld2_fsk;500fg_apk;500fg_fsk;300ob
100113	2287786	247	1327032	1871355	21166	d__Bacteria	Firmicutes	c__Bacilli	o__Lactobacillales	f__Streptococcaceae	g__Streptococcus	s__Streptococcus salivarius	s__Streptococcus salivarius	s__Streptococcus salivarius:100113	27366	NA	23384	23715	NA	23195	NA	23294	23784	19124	0.020622	NA	0.0176213	0.0178707	NA	0.0174789	NA	0.0175535	0.0179227	0.0144111	3	lld1;lld2_apk;500fg_apk;300ob;ibd;300tzfg
100123	6349015	48	4259045	5662224	3878	d__Bacteria	Firmicutes_A	c__Clostridia	o__Lachnospirales	f__Lachnospiraceae	g__Blautia	s__Blautia producta_A	s__Blautia producta_A	s__Blautia producta_A:100123	3605	NA	NA	NA	NA	NA	NA	NA	3605	NA	0.000846434	NA	NA	NA	NA	NA	NA	NA	0.000846434	NA	0	ibd
100133	3315990	94	2182086	2918148	10172	d__Bacteria	Firmicutes_A	c__Clostridia	o__Lachnospirales	f__Lachnospiraceae	g__Blautia_A	s__GCA_000433815.1	s__GCA_000433815.1	s__GCA_000433815.1:100133	61188	NA	1242	1137	NA	NA	NA	23179	59919	NA	0.0280411	NA	0.00056918	0.000521061	NA	NA	NA	0.0106224	0.0274595	NA	2	lld1;lld2_apk;300ob;ibd
100136	3864718	23	2088965	3384459	3992	d__Bacteria	Firmicutes_A	c__Clostridia	o__Lachnospirales	f__Lachnospiraceae	g__Agathobacter	s__GCA_000434275.1	s__GCA_000434275.1	s__GCA_000434275.1:100136	13320	2191	11605	12040	1722	11073	9907	11216	NA	NA	0.00637636	0.00104884	0.00555538	0.00576362	0.000824332	0.00530071	0.00474254	0.00536917	NA	NA	6	dmp;lld1;lld2_apk;lld2_fsk;500fg_apk;500fg_fsk;300ob
100138	4528530	72	3049100	4084134	8259	d__Bacteria	Bacteroidota	c__Bacteroidia	o__Bacteroidales	f__Tannerellaceae	g__Parabacteroides	s__Parabacteroides johnsonii	s__Parabacteroides johnsonii	s__Parabacteroides johnsonii:100138	2678	1122	NA	NA	NA	NA	2139	NA	NA	1383	0.000878292	0.000367977	NA	NA	NA	NA	0.000701518	NA	NA	0.000453576	2	dmp;500fg_fsk;300tzfg
100139	2779409	52	1959250	2380617	7694	d__Bacteria	Firmicutes_A	c__Clostridia	o__Lachnospirales	f__Lachnospiraceae	g__CAG-156	s__GCA_000434315.1	s__GCA_000434315.1	s__GCA_000434315.1:100139	32166	NA	7014	25179	NA	19956	NA	22988	NA	NA	0.0164175	NA	0.00357994	0.0128513	NA	0.0101855	NA	0.0117331	NA	NA	3	lld1;lld2_apk;500fg_apk;300ob
100140	3404725	109	1704467	2999031	9373	d__Bacteria	Firmicutes_A	c__Clostridia	o__Lachnospirales	f__Lachnospiraceae	g__CAG-56	s__GCA_900066065.1	s__GCA_900066065.1	s__GCA_900066065.1:100140	18046	11673	12552	12582	12136	12447	12427	12231	12982	12887	0.0105875	0.00684848	0.00736418	0.00738178	0.00712011	0.00730258	0.00729084	0.00717585	0.00761646	0.00756072	6	dmp;lld1;lld2_apk;lld2_fsk;500fg_apk;500fg_fsk;300ob;ibd;300tzfg
100141	3574863	18	1758758	3204420	7004	d__Bacteria	Firmicutes_A	c__Clostridia	o__Lachnospirales	f__Lachnospiraceae	g__	s__	f__Lachnospiraceae	f__Lachnospiraceae:100141	59149	39506	34297	41684	39972	37818	41807	36204	NA	45668	0.0336311	0.0224624	0.0195007	0.0237008	0.0227274	0.0215027	0.0237708	0.020585	NA	0.0259661	6	dmp;lld1;lld2_apk;lld2_fsk;500fg_apk;500fg_fsk;300ob;300tzfg
100142	3777912	197	1913964	3286263	17149	d__Bacteria	Firmicutes_A	c__Clostridia	o__Lachnospirales	f__Lachnospiraceae	g__Blautia_A	s__Blautia_A massiliensis	s__Blautia_A massiliensis	s__Blautia_A massiliensis:100142	12419	4732	6237	6313	5012	6394	6108	6341	6357	10058	0.00648863	0.00247236	0.00325868	0.00329839	0.00261865	0.00334071	0.00319128	0.00331302	0.00332138	0.00525506	6	dmp;lld1;lld2_apk;lld2_fsk;500fg_apk;500fg_fsk;300ob;ibd;300tzfg
100143	3155093	13	2417671	2656749	1370	d__Bacteria	Firmicutes	c__Bacilli	o__Haloplasmatales	f__Turicibacteraceae	g__Turicibacter	s__Turicibacter sanguinis	s__Turicibacter sanguinis	s__Turicibacter sanguinis:100143	5850	NA	5600	2501	NA	NA	NA	1097	NA	NA	0.00241968	NA	0.00231628	0.00103447	NA	NA	NA	0.000453742	NA	NA	2	lld1;lld2_apk;300ob
100144	3363615	1000	2651263	3015006	18089	d__Bacteria	Bacteroidota	c__Bacteroidia	o__Bacteroidales	f__Barnesiellaceae	g__Barnesiella	s__Barnesiella intestinihominis	s__Barnesiella intestinihominis	s__Barnesiella intestinihominis:100144	32689	28047	27801	28264	28001	28775	28486	28473	26732	24620	0.0123296	0.0105787	0.0104859	0.0106606	0.0105614	0.0108533	0.0107443	0.0107394	0.0100827	0.00928614	6	dmp;lld1;lld2_apk;lld2_fsk;500fg_apk;500fg_fsk;300ob;ibd;300tzfg
100146	3356760	69	1781384	2960982	12638	d__Bacteria	Firmicutes_A	c__Clostridia	o__Lachnospirales	f__Lachnospiraceae	g__Dorea	s__Dorea formicigenerans	s__Dorea formicigenerans	s__Dorea formicigenerans:100146	21188	NA	13226	13237	NA	13087	10705	13678	15127	16611	0.0118941	NA	0.00742456	0.00743074	NA	0.00734654	0.00600937	0.0076783	0.00849171	0.00932477	4	lld1;lld2_apk;500fg_apk;500fg_fsk;300ob;ibd;300tzfg
100148	3861016	200	1641015	3319242	6017	d__Bacteria	Firmicutes_A	c__Clostridia	o__Lachnospirales	f__Lachnospiraceae	g__Tyzzerella	s__Tyzzerella nexilis	s__Tyzzerella nexilis	s__Tyzzerella nexilis:100148	16975	NA	NA	NA	NA	NA	NA	NA	16975	NA	0.0103442	NA	NA	NA	NA	NA	NA	NA	0.0103442	NA	0	ibd
100149	3747583	13	2969554	3167067	2372	d__Bacteria	Firmicutes_A	c__Clostridia	o__Clostridiales	f__Clostridiaceae	g__Clostridium	s__Clostridium saudiense	s__Clostridium saudiense	s__Clostridium saudiense:100149	12347	NA	10795	9209	NA	NA	NA	10398	4111	NA	0.00415786	NA	0.00363523	0.00310114	NA	NA	NA	0.00350154	0.00138438	NA	2	lld1;lld2_apk;300ob;ibd
100153	2738609	42	2084437	2504400	10293	d__Bacteria	Firmicutes_A	c__Clostridia	o__Lachnospirales	f__Lachnospiraceae	g__CAG-45	s__GCA_000438375.1	s__GCA_000438375.1	s__GCA_000438375.1:100153	56762	4390	NA	27312	3948	1832	9903	NA	NA	49426	0.0272313	0.00210608	NA	0.0131028	0.00189404	0.000878894	0.00475092	NA	NA	0.0237119	5	dmp;lld2_apk;lld2_fsk;500fg_apk;500fg_fsk;300tzfg
100154	3346898	737	1996389	2898708	15325	d__Bacteria	Firmicutes_A	c__Clostridia	o__Lachnospirales	f__Lachnospiraceae	g__CAG-45	s__GCA_900066395.1	s__GCA_900066395.1	s__GCA_900066395.1:100154	34060	14934	16261	16249	15171	16521	16042	16402	2959	23578	0.0170608	0.00748051	0.00814521	0.0081392	0.00759922	0.00827544	0.00803551	0.00821583	0.00148218	0.0118103	6	dmp;lld1;lld2_apk;lld2_fsk;500fg_apk;500fg_fsk;300ob;ibd;300tzfg
100159	3301306	99	2197664	2951769	6272	d__Bacteria	Firmicutes_A	c__Clostridia	o__Lachnospirales	f__Lachnospiraceae	g__Sellimonas	s__Sellimonas intestinalis	s__Sellimonas intestinalis	s__Sellimonas intestinalis:100159	17803	NA	NA	NA	NA	NA	NA	NA	17803	NA	0.00810087	NA	NA	NA	NA	NA	NA	NA	0.00810087	NA	0	ibd
100169	2837382	14	1804094	2517399	3229	d__Bacteria	Firmicutes_A	c__Clostridia	o__Lachnospirales	f__Lachnospiraceae	g__Eubacterium_G	s__GCA_000432355.1	s__GCA_000432355.1	s__GCA_000432355.1:100169	21598	NA	11510	17247	NA	2750	NA	18004	NA	NA	0.0119717	NA	0.00637993	0.00955992	NA	0.00152431	NA	0.00997952	NA	NA	3	lld1;lld2_apk;500fg_apk;300ob
100170	3119159	79	2146515	2765646	7114	d__Bacteria	Bacteroidota	c__Bacteroidia	o__Bacteroidales	f__Rikenellaceae	g__Alistipes_A	s__Alistipes_A sp1	s__Alistipes_A sp1	s__Alistipes_A sp1:100170	24790	21993	NA	11527	20411	2684	20895	NA	NA	3180	0.011549	0.0102459	NA	0.0053701	0.0095089	0.0012504	0.00973438	NA	NA	0.00148147	5	dmp;lld2_apk;lld2_fsk;500fg_apk;500fg_fsk;300tzfg
100177	2113211	397	1564008	1856439	11019	d__Bacteria	Firmicutes_A	c__Clostridia	o__Lachnospirales	f__Anaerotignaceae	g__Anaerotignum	s__Anaerotignum sp1	s__Anaerotignum sp1	s__Anaerotignum sp1:100177	39021	25836	23012	23080	24599	23668	25851	24794	9290	33033	0.0249494	0.0165191	0.0147135	0.014757	0.0157282	0.0151329	0.0165287	0.0158529	0.00593987	0.0211207	6	dmp;lld1;lld2_apk;lld2_fsk;500fg_apk;500fg_fsk;300ob;ibd;300tzfg
100183	5177693	92	2659328	4725153	12251	d__Bacteria	Bacteroidota	c__Bacteroidia	o__Bacteroidales	f__Marinifilaceae	g__Butyricimonas	s__GCF_002161485.1	s__GCF_002161485.1	s__GCF_002161485.1:100183	74670	60926	NA	NA	58312	NA	72181	NA	NA	NA	0.0280785	0.0229103	NA	NA	0.0219273	NA	0.0271426	NA	NA	NA	3	dmp;lld2_fsk;500fg_fsk
100185	3029528	265	1543656	2574315	19261	d__Bacteria	Firmicutes_A	c__Clostridia	o__Oscillospirales	f__Butyricicoccaceae	g__Agathobaculum	s__Agathobaculum sp1	s__Agathobaculum sp1	s__Agathobaculum sp1:100185	52965	25500	24798	25531	25952	27967	27886	24192	29100	37943	0.0343114	0.0165192	0.0160645	0.0165393	0.016812	0.0181174	0.0180649	0.0156719	0.0188514	0.02458	6	dmp;lld1;lld2_apk;lld2_fsk;500fg_apk;500fg_fsk;300ob;ibd;300tzfg
100190	2801138	1000	2071198	2547732	16851	d__Bacteria	Firmicutes_A	c__Clostridia	o__Lachnospirales	f__Lachnospiraceae	g__	s__	f__Lachnospiraceae	f__Lachnospiraceae:100190	14493	8843	8841	8920	8874	9428	9309	8754	NA	12575	0.0069974	0.00426951	0.00426854	0.00430669	0.00428448	0.00455195	0.0044945	0.00422654	NA	0.00607137	6	dmp;lld1;lld2_apk;lld2_fsk;500fg_apk;500fg_fsk;300ob;300tzfg
100193	3560431	171	2113464	3178056	21002	d__Bacteria	Firmicutes_A	c__Clostridia	o__Lachnospirales	f__Lachnospiraceae	g__KLE1615	s__KLE1615 sp1	s__KLE1615 sp1	s__KLE1615 sp1:100193	54651	34436	37359	39212	37494	38206	38065	32902	39348	41076	0.0258585	0.0162936	0.0176767	0.0185534	0.0177405	0.0180774	0.0180107	0.0155678	0.0186178	0.0194354	6	dmp;lld1;lld2_apk;lld2_fsk;500fg_apk;500fg_fsk;300ob;ibd;300tzfg
100194	3575329	39	1862170	3161442	4997	d__Bacteria	Firmicutes_A	c__Clostridia	o__Lachnospirales	f__Lachnospiraceae	g__	s__	f__Lachnospiraceae	f__Lachnospiraceae:100194	19752	9009	NA	NA	8925	NA	17096	NA	NA	12860	0.010607	0.0048379	NA	NA	0.0047928	NA	0.00918069	NA	NA	0.00690592	3	dmp;lld2_fsk;500fg_fsk;300tzfg
100195	3389503	97	1547173	2959878	12680	d__Bacteria	Firmicutes_A	c__Clostridia	o__Oscillospirales	f__Ruminococcaceae	g__Faecalibacterium	s__Faecalibacterium prausnitzii_E	s__Faecalibacterium prausnitzii_E	s__Faecalibacterium prausnitzii_E:100195	42212	24093	23951	23717	24448	24476	24835	23604	NA	26056	0.0272833	0.0155723	0.0154805	0.0153292	0.0158017	0.0158198	0.0160519	0.0152562	NA	0.016841	6	dmp;lld1;lld2_apk;lld2_fsk;500fg_apk;500fg_fsk;300ob;300tzfg
100196	6554676	207	4062005	5909403	21063	d__Bacteria	Bacteroidota	c__Bacteroidia	o__Bacteroidales	f__Bacteroidaceae	g__Bacteroides	s__Bacteroides thetaiotaomicron	s__Bacteroides thetaiotaomicron	s__Bacteroides thetaiotaomicron:100196	12666	10319	8979	10229	10263	10563	10641	10358	10245	10095	0.00311816	0.00254037	0.00221048	0.00251821	0.00252658	0.00260044	0.00261964	0.00254997	0.00252215	0.00248523	6	dmp;lld1;lld2_apk;lld2_fsk;500fg_apk;500fg_fsk;300ob;ibd;300tzfg
100199	2083002	42	1362887	1858878	19603	d__Bacteria	Firmicutes	c__Bacilli	o__Lactobacillales	f__Streptococcaceae	g__Streptococcus	s__GCF_001813525.1	s__GCF_001813525.1	s__GCF_001813525.1:100199	80353	NA	66860	65518	NA	37575	2766	68170	71236	52127	0.0589579	NA	0.0490576	0.048073	NA	0.0275702	0.00202952	0.0500188	0.0522685	0.0382475	4	lld1;lld2_apk;500fg_apk;500fg_fsk;300ob;ibd;300tzfg
100200	4297211	51	2406540	3655185	10220	d__Bacteria	Firmicutes_A	c__Clostridia	o__Lachnospirales	f__Lachnospiraceae	g__Blautia_A	s__	g__Blautia_A	g__Blautia_A:100200	14161	NA	NA	NA	NA	NA	NA	NA	NA	14161	0.00588438	NA	NA	NA	NA	NA	NA	NA	NA	0.00588438	0	300tzfg
100201	4476768	12	2717774	3928845	2594	d__Bacteria	Firmicutes_A	c__Clostridia	o__Lachnospirales	f__Lachnospiraceae	g__Blautia_A	s__GCA_900066145.1	s__GCA_900066145.1	s__GCA_900066145.1:100201	38404	NA	32488	33873	NA	30449	3098	32355	24617	32594	0.0141307	NA	0.0119539	0.0124635	NA	0.0112037	0.0011399	0.011905	0.00905778	0.0119929	4	lld1;lld2_apk;500fg_apk;500fg_fsk;300ob;ibd;300tzfg
100203	4681288	121	2362236	4254714	10497	d__Bacteria	Bacteroidota	c__Bacteroidia	o__Bacteroidales	f__Marinifilaceae	g__Butyricimonas	s__Butyricimonas virosa	s__Butyricimonas virosa	s__Butyricimonas virosa:100203	52526	35994	NA	NA	45287	NA	38956	11953	NA	9475	0.0222357	0.0152373	NA	NA	0.0191712	NA	0.0164912	0.00506004	NA	0.00401103	3	dmp;lld2_fsk;500fg_fsk;300ob;300tzfg
100204	3090607	65	1732169	2623953	7944	d__Bacteria	Firmicutes_A	c__Clostridia	o__Lachnospirales	f__Lachnospiraceae	g__Eubacterium_G	s__GCA_000435815.1	s__GCA_000435815.1	s__GCA_000435815.1:100204	26881	NA	21873	22475	NA	21429	NA	12595	NA	NA	0.0155187	NA	0.0126275	0.0129751	NA	0.0123712	NA	0.00727123	NA	NA	3	lld1;lld2_apk;500fg_apk;300ob
100205	3757782	252	1849393	3183750	19472	d__Bacteria	Firmicutes_A	c__Clostridia	o__Lachnospirales	f__Lachnospiraceae	g__CAG-81	s__CAG-81 sp1	s__CAG-81 sp1	s__CAG-81 sp1:100205	11424	7872	NA	NA	7911	5933	8104	5018	4339	8635	0.00617716	0.00425653	NA	NA	0.00427762	0.00320808	0.00438198	0.00271332	0.00234618	0.0046691	4	dmp;lld2_fsk;500fg_apk;500fg_fsk;300ob;ibd;300tzfg
100206	3004817	14	1749208	2691888	5692	d__Bacteria	Firmicutes_A	c__Clostridia	o__Lachnospirales	f__Lachnospiraceae	g__Dorea	s__GCA_900066555.1	s__GCA_900066555.1	s__GCA_900066555.1:100206	61726	NA	46218	47778	NA	47193	NA	42830	47822	38375	0.035288	NA	0.0264222	0.0273141	NA	0.0269796	NA	0.0244854	0.0273392	0.0219385	3	lld1;lld2_apk;500fg_apk;300ob;ibd;300tzfg
100208	3574479	363	1674656	2988894	9735	d__Bacteria	Firmicutes_A	c__Clostridia	o__Lachnospirales	f__Lachnospiraceae	g__Eubacterium_G	s__Eubacterium_G ventriosum	s__Eubacterium_G ventriosum	s__Eubacterium_G ventriosum:100208	16971	NA	11687	10979	NA	11874	11494	11752	11323	6827	0.010134	NA	0.00697875	0.00655597	NA	0.00709041	0.0068635	0.00701756	0.00676139	0.00407666	4	lld1;lld2_apk;500fg_apk;500fg_fsk;300ob;ibd;300tzfg
100209	3084017	700	1928453	2766864	16100	d__Bacteria	Firmicutes_A	c__Clostridia	o__Lachnospirales	f__Lachnospiraceae	g__Eubacterium_F	s__	g__Eubacterium_F	g__Eubacterium_F:100209	40254	28190	27691	29138	28216	27742	27091	28077	30009	27061	0.0208737	0.0146179	0.0143592	0.0151095	0.0146314	0.0143856	0.014048	0.0145593	0.0155612	0.0140325	6	dmp;lld1;lld2_apk;lld2_fsk;500fg_apk;500fg_fsk;300ob;ibd;300tzfg
100212	3911172	77	2140562	3482412	13984	d__Bacteria	Firmicutes_A	c__Clostridia	o__Lachnospirales	f__Lachnospiraceae	g__Blautia_A	s__Blautia_A obeum	s__Blautia_A obeum	s__Blautia_A obeum:100212	20513	1353	15998	15970	1747	15969	13101	15815	15985	15670	0.009583	0.000632077	0.00747374	0.00746066	0.000816141	0.00746019	0.00612036	0.00738825	0.00746767	0.00732051	6	dmp;lld1;lld2_apk;lld2_fsk;500fg_apk;500fg_fsk;300ob;ibd;300tzfg
100214	2021653	44	1389313	1777998	15276	d__Bacteria	Firmicutes_C	c__Negativicutes	o__Veillonellales	f__Veillonellaceae	g__Veillonella	s__Veillonella dispar_A	s__Veillonella dispar_A	s__Veillonella dispar_A:100214	16875	NA	NA	NA	NA	NA	2122	NA	7262	12350	0.0121463	NA	NA	NA	NA	NA	0.00152737	NA	0.00522704	0.00888929	1	500fg_fsk;ibd;300tzfg
100215	3117648	130	1749059	2696586	18408	d__Bacteria	Bacteroidota	c__Bacteroidia	o__Bacteroidales	f__Bacteroidaceae	g__Prevotella	s__Prevotella stercorea	s__Prevotella stercorea	s__Prevotella stercorea:100215	45554	NA	NA	NA	NA	NA	NA	NA	NA	45554	0.0260449	NA	NA	NA	NA	NA	NA	NA	NA	0.0260449	0	300tzfg
100217	4169640	1000	2304824	3657330	19801	d__Bacteria	Firmicutes_A	c__Clostridia	o__Lachnospirales	f__Lachnospiraceae	g__CAG-65	s__CAG-65 sp3	s__CAG-65 sp3	s__CAG-65 sp3:100217	5213	3444	3560	3510	3393	3454	3473	3452	3325	3371	0.00226178	0.00149426	0.00154459	0.00152289	0.00147213	0.0014986	0.00150684	0.00149773	0.00144263	0.00146258	6	dmp;lld1;lld2_apk;lld2_fsk;500fg_apk;500fg_fsk;300ob;ibd;300tzfg
100231	3148208	1000	2194199	2788719	15931	d__Bacteria	Firmicutes_A	c__Clostridia	o__Lachnospirales	f__Lachnospiraceae	g__Coprococcus	s__Coprococcus eutactus_A	s__Coprococcus eutactus_A	s__Coprococcus eutactus_A:100231	14931	8225	8479	8496	8300	8575	8226	8520	NA	11845	0.00680476	0.00374852	0.00386428	0.00387203	0.0037827	0.00390803	0.00374898	0.00388297	NA	0.00539833	6	dmp;lld1;lld2_apk;lld2_fsk;500fg_apk;500fg_fsk;300ob;300tzfg
100233	3615760	78	1663425	3076428	12839	d__Bacteria	Firmicutes_A	c__Clostridia	o__Lachnospirales	f__Lachnospiraceae	g__CAG-81	s__GCA_900066785.1	s__GCA_900066785.1	s__GCA_900066785.1:100233	20578	8416	NA	NA	8666	3532	8607	NA	NA	15242	0.0123709	0.00505944	NA	NA	0.00520973	0.00212333	0.00517426	NA	NA	0.00916302	4	dmp;lld2_fsk;500fg_apk;500fg_fsk;300tzfg
100242	3973415	391	2579170	3471834	7437	d__Bacteria	Firmicutes_A	c__Clostridia	o__Lachnospirales	f__Lachnospiraceae	g__Clostridium_M	s__GCA_000431375.1	s__GCA_000431375.1	s__GCA_000431375.1:100242	8096	3426	5320	4842	2246	5835	5833	5898	5330	6508	0.00313899	0.00132833	0.00206268	0.00187735	0.000870823	0.00226236	0.00226158	0.00228678	0.00206656	0.00252329	6	dmp;lld1;lld2_apk;lld2_fsk;500fg_apk;500fg_fsk;300ob;ibd;300tzfg
100243	4177369	201	2667754	3705750	6480	d__Bacteria	Bacteroidota	c__Bacteroidia	o__Bacteroidales	f__Bacteroidaceae	g__Bacteroides_B	s__Bacteroides_B massiliensis	s__Bacteroides_B massiliensis	s__Bacteroides_B massiliensis:100243	2842	2257	1937	2384	2345	2119	2213	2355	NA	NA	0.00106532	0.00084603	0.000726079	0.000893636	0.000879017	0.000794301	0.000829537	0.000882765	NA	NA	6	dmp;lld1;lld2_apk;lld2_fsk;500fg_apk;500fg_fsk;300ob
100244	2464025	393	1454948	2168976	14203	d__Bacteria	Firmicutes	c__Bacilli	o__Erysipelotrichales	f__Erysipelatoclostridiaceae	g__Catenibacterium	s__GCA_000437715.1	s__GCA_000437715.1	s__GCA_000437715.1:100244	13287	NA	2210	6054	NA	NA	NA	10534	NA	4964	0.00913229	NA	0.00151895	0.00416097	NA	NA	NA	0.00724012	NA	0.00341181	2	lld1;lld2_apk;300ob;300tzfg
100245	3794702	70	2658830	3367314	15802	d__Bacteria	Firmicutes_A	c__Clostridia	o__Lachnospirales	f__Lachnospiraceae	g__Roseburia	s__	g__Roseburia	g__Roseburia:100245	2988	NA	NA	NA	NA	NA	NA	NA	NA	2988	0.0011238	NA	NA	NA	NA	NA	NA	NA	NA	0.0011238	0	300tzfg
100249	3299535	241	1666964	2851641	17355	d__Bacteria	Firmicutes_A	c__Clostridia	o__Lachnospirales	f__Lachnospiraceae	g__Ruminococcus_B	s__Ruminococcus_B faecis	s__Ruminococcus_B faecis	s__Ruminococcus_B faecis:100249	9477	1768	6046	5951	1804	6436	5572	6410	6038	7468	0.00568519	0.00106061	0.00362695	0.00356996	0.00108221	0.00386091	0.0033426	0.00384531	0.00362215	0.00448	6	dmp;lld1;lld2_apk;lld2_fsk;500fg_apk;500fg_fsk;300ob;ibd;300tzfg
100250	3613665	138	2267542	3104391	11895	d__Bacteria	Firmicutes_A	c__Clostridia	o__Lachnospirales	f__Lachnospiraceae	g__TF01-11	s__GCF_001414325.1	s__GCF_001414325.1	s__GCF_001414325.1:100250	36326	NA	16536	28453	1609	24169	24109	21693	NA	20059	0.01602	NA	0.00729248	0.0125479	0.000709579	0.0106587	0.0106322	0.00956675	NA	0.00884614	5	lld1;lld2_apk;lld2_fsk;500fg_apk;500fg_fsk;300ob;300tzfg
100251	3229024	1000	1941391	2846685	10236	d__Bacteria	Firmicutes_A	c__Clostridia	o__Lachnospirales	f__Lachnospiraceae	g__Fusicatenibacter	s__Fusicatenibacter saccharivorans	s__Fusicatenibacter saccharivorans	s__Fusicatenibacter saccharivorans:100251	1955	1389	1441	1441	1388	1450	1399	1431	1404	1240	0.00100701	0.000715466	0.000742251	0.000742251	0.000714951	0.000746887	0.000720617	0.0007371	0.000723193	0.000638717	6	dmp;lld1;lld2_apk;lld2_fsk;500fg_apk;500fg_fsk;300ob;ibd;300tzfg
100252	3237686	29	2063120	2878272	5547	d__Bacteria	Firmicutes_A	c__Clostridia	o__Lachnospirales	f__Lachnospiraceae	g__Blautia_A	s__	g__Blautia_A	g__Blautia_A:100252	71296	NA	55721	57294	NA	53051	3340	62484	58512	49290	0.0345574	NA	0.0270081	0.0277706	NA	0.025714	0.00161891	0.0302862	0.0283609	0.023891	4	lld1;lld2_apk;500fg_apk;500fg_fsk;300ob;ibd;300tzfg
100253	2408852	511	1326906	2150271	9239	d__Bacteria	Firmicutes	c__Bacilli	o__Erysipelotrichales	f__Erysipelotrichaceae	g__Holdemanella	s__	g__Holdemanella	g__Holdemanella:100253	20339	NA	15302	15694	NA	14526	4534	16330	11686	9903	0.0153281	NA	0.0115321	0.0118275	NA	0.0109473	0.00341697	0.0123068	0.00880695	0.00746323	4	lld1;lld2_apk;500fg_apk;500fg_fsk;300ob;ibd;300tzfg
100254	4102700	854	2627440	3678570	4909	d__Bacteria	Bacteroidota	c__Bacteroidia	o__Bacteroidales	f__Marinifilaceae	g__Odoribacter	s__Odoribacter splanchnicus	s__Odoribacter splanchnicus	s__Odoribacter splanchnicus:100254	8433	6803	5358	6664	6742	6529	6525	6892	4941	5586	0.00320959	0.00258921	0.00203925	0.00253631	0.002566	0.00248493	0.00248341	0.00262309	0.00188054	0.00212602	6	dmp;lld1;lld2_apk;lld2_fsk;500fg_apk;500fg_fsk;300ob;ibd;300tzfg
100255	3440412	10	2000704	2969598	1946	d__Bacteria	Firmicutes_A	c__Clostridia	o__Lachnospirales	f__Lachnospiraceae	g__CAG-81	s__GCA_900066055.1	s__GCA_900066055.1	s__GCA_900066055.1:100255	10866	NA	NA	NA	NA	NA	2853	NA	NA	10327	0.00543109	NA	NA	NA	NA	NA	0.001426	NA	NA	0.00516168	1	500fg_fsk;300tzfg
100259	2907631	22	1902485	2608329	8768	d__Bacteria	Firmicutes_A	c__Clostridia	o__Lachnospirales	f__Lachnospiraceae	g__	s__	f__Lachnospiraceae	f__Lachnospiraceae:100259	37866	16750	NA	NA	15481	1961	22532	3936	NA	30248	0.0199034	0.00880427	NA	NA	0.00813725	0.00103076	0.0118435	0.00206887	NA	0.0158992	4	dmp;lld2_fsk;500fg_apk;500fg_fsk;300ob;300tzfg
100262	3705163	298	2143463	3078006	9291	d__Bacteria	Firmicutes_A	c__Clostridia	o__Lachnospirales	f__Lachnospiraceae	g__Eubacterium_E	s__Eubacterium_E hallii	s__Eubacterium_E hallii	s__Eubacterium_E hallii:100262	5515	NA	3525	3519	NA	3616	3025	3494	3696	4385	0.00257294	NA	0.00164454	0.00164174	NA	0.00168699	0.00141127	0.00163007	0.00172431	0.00204575	4	lld1;lld2_apk;500fg_apk;500fg_fsk;300ob;ibd;300tzfg
100263	3761957	33	2357209	3274974	9173	d__Bacteria	Firmicutes_A	c__Clostridia	o__Lachnospirales	f__Lachnospiraceae	g__Blautia_A	s__GCA_900066335.1	s__GCA_900066335.1	s__GCA_900066335.1:100263	10811	5736	8805	8777	5335	8923	8442	8777	8749	8523	0.00458636	0.00243339	0.00373535	0.00372347	0.00226327	0.00378541	0.00358135	0.00372347	0.00371159	0.00361572	6	dmp;lld1;lld2_apk;lld2_fsk;500fg_apk;500fg_fsk;300ob;ibd;300tzfg
100265	5547817	19	3274268	4983138	9706	d__Bacteria	Bacteroidota	c__Bacteroidia	o__Bacteroidales	f__Bacteroidaceae	g__Bacteroides	s__Bacteroides nordii	s__Bacteroides nordii	s__Bacteroides nordii:100265	2985	NA	NA	NA	NA	NA	2985	NA	NA	NA	0.000911654	NA	NA	NA	NA	NA	0.000911654	NA	NA	NA	1	500fg_fsk
100268	3599641	10	1817718	3171171	4947	d__Bacteria	Firmicutes_A	c__Clostridia	o__Lachnospirales	f__Lachnospiraceae	g__Ruminococcus_B	s__GCA_900066545.1	s__GCA_900066545.1	s__GCA_900066545.1:100268	49109	NA	11815	17741	NA	5558	NA	13469	NA	42764	0.0270168	NA	0.00649991	0.00976004	NA	0.00305768	NA	0.00740984	NA	0.0235262	3	lld1;lld2_apk;500fg_apk;300ob;300tzfg
100271	3832953	713	2013681	3375387	21667	d__Bacteria	Firmicutes_A	c__Clostridia	o__Lachnospirales	f__Lachnospiraceae	g__Roseburia	s__Roseburia inulinivorans	s__Roseburia inulinivorans	s__Roseburia inulinivorans:100271	2087	1461	1494	1466	1440	1472	1460	1504	1449	1828	0.00103641	0.000725537	0.000741925	0.00072802	0.000715108	0.000731	0.00072504	0.000746891	0.000719578	0.00090779	6	dmp;lld1;lld2_apk;lld2_fsk;500fg_apk;500fg_fsk;300ob;ibd;300tzfg
100272	3850161	33	1715425	3388314	10874	d__Bacteria	Bacteroidota	c__Bacteroidia	o__Bacteroidales	f__Bacteroidaceae	g__Prevotella	s__GCA_000434515.1	s__GCA_000434515.1	s__GCA_000434515.1:100272	37963	NA	NA	NA	NA	NA	NA	NA	NA	37963	0.0221304	NA	NA	NA	NA	NA	NA	NA	NA	0.0221304	0	300tzfg
100273	3493311	127	2133405	3137403	8127	d__Bacteria	Bacteroidota	c__Bacteroidia	o__Bacteroidales	f__Bacteroidaceae	g__Bacteroides_A	s__Bacteroides_A coprophilus	s__Bacteroides_A coprophilus	s__Bacteroides_A coprophilus:100273	15098	NA	NA	NA	15098	NA	NA	NA	NA	NA	0.00707695	NA	NA	NA	0.00707695	NA	NA	NA	NA	NA	1	lld2_fsk
100278	3239629	16	1760554	2831907	8610	d__Bacteria	Firmicutes_A	c__Clostridia	o__Lachnospirales	f__Lachnospiraceae	g__Hungatella_A	s__	g__Hungatella_A	g__Hungatella_A:100278	49730	28191	NA	NA	25084	3380	33712	10090	NA	39975	0.0282468	0.0160126	NA	NA	0.0142478	0.00191985	0.0191485	0.00573115	NA	0.0227059	4	dmp;lld2_fsk;500fg_apk;500fg_fsk;300ob;300tzfg
100280	2635846	27	1813055	2410185	5092	d__Bacteria	Firmicutes_A	c__Clostridia	o__Lachnospirales	f__Lachnospiraceae	g__	s__	f__Lachnospiraceae	f__Lachnospiraceae:100280	30401	NA	4158	16753	NA	NA	1416	2845	NA	24645	0.0167678	NA	0.00229337	0.00924021	NA	NA	0.000781002	0.00156917	NA	0.0135931	3	lld1;lld2_apk;500fg_fsk;300ob;300tzfg
100282	3065688	84	2201390	2734977	11678	d__Bacteria	Firmicutes_A	c__Clostridia	o__Lachnospirales	f__Lachnospiraceae	g__TF01-11	s__GCA_000432755.1	s__GCA_000432755.1	s__GCA_000432755.1:100282	24981	NA	NA	NA	NA	NA	NA	NA	NA	24981	0.0113478	NA	NA	NA	NA	NA	NA	NA	NA	0.0113478	0	300tzfg
100344	3082465	10	1754771	2673573	1055	d__Bacteria	Firmicutes_A	c__Clostridia	o__4C28d-15	f__CAG-727	g__	s__	f__CAG-727	f__CAG-727:100344	41540	41260	NA	NA	41116	NA	35419	NA	NA	NA	0.0236726	0.023513	NA	NA	0.023431	NA	0.0201844	NA	NA	NA	3	dmp;lld2_fsk;500fg_fsk
100362	3144709	261	1936552	2733375	13895	d__Bacteria	Firmicutes_A	c__Clostridia	o__Oscillospirales	f__Ruminococcaceae	g__CAG-115	s__GCA_000436675.1	s__GCA_000436675.1	s__GCA_000436675.1:100362	63924	45771	31097	45172	45601	32948	45785	41973	NA	40655	0.0330092	0.0236353	0.0160579	0.023326	0.0235475	0.0170137	0.0236425	0.0216741	NA	0.0209935	6	dmp;lld1;lld2_apk;lld2_fsk;500fg_apk;500fg_fsk;300ob;300tzfg
100369	2739602	23	1617442	2393667	7132	d__Bacteria	Firmicutes_A	c__Clostridia	o__Oscillospirales	f__Oscillospiraceae	g__CAG-170	s__	g__CAG-170	g__CAG-170:100369	50536	38196	35944	37147	39141	32545	39289	37905	NA	42232	0.0312444	0.0236151	0.0222227	0.0229665	0.0241993	0.0201213	0.0242908	0.0234352	NA	0.0261104	6	dmp;lld1;lld2_apk;lld2_fsk;500fg_apk;500fg_fsk;300ob;300tzfg
100370	3376921	52	2074085	3013134	10783	d__Bacteria	Firmicutes_A	c__Clostridia	o__Oscillospirales	f__Oscillospiraceae	g__CAG-170	s__	g__CAG-170	g__CAG-170:100370	23432	16567	15968	16163	16289	15774	16785	16534	NA	14573	0.0112975	0.00798762	0.00769882	0.00779283	0.00785358	0.00760528	0.00809273	0.00797171	NA	0.00702623	6	dmp;lld1;lld2_apk;lld2_fsk;500fg_apk;500fg_fsk;300ob;300tzfg
100404	2429300	129	1658128	2152803	14549	d__Bacteria	Firmicutes_A	c__Clostridia	o__Lachnospirales	f__Lachnospiraceae	g__	s__	f__Lachnospiraceae	f__Lachnospiraceae:100404	51346	36282	40507	40690	38974	41504	40153	40094	33517	36216	0.0309662	0.0218813	0.0244294	0.0245397	0.0235048	0.0250306	0.0242159	0.0241803	0.0202138	0.0218415	6	dmp;lld1;lld2_apk;lld2_fsk;500fg_apk;500fg_fsk;300ob;ibd;300tzfg
100409	3127238	30	1669813	2805210	1498	d__Bacteria	Firmicutes_A	c__Clostridia	o__4C28d-15	f__CAG-727	g__	s__	f__CAG-727	f__CAG-727:100409	26747	25695	NA	NA	25715	NA	23659	NA	NA	NA	0.016018	0.015388	NA	NA	0.0153999	NA	0.0141687	NA	NA	NA	3	dmp;lld2_fsk;500fg_fsk
100412	2765323	545	1722761	2189478	12488	d__Bacteria	Proteobacteria	c__Gammaproteobacteria	o__Enterobacterales	f__Succinivibrionaceae	g__Succinivibrio	s__GCA_000431835.1	s__GCA_000431835.1	s__GCA_000431835.1:100412	27585	NA	NA	NA	NA	NA	NA	NA	NA	27585	0.0160121	NA	NA	NA	NA	NA	NA	NA	NA	0.0160121	0	300tzfg
100429	2344094	24	1246198	2048190	4439	d__Bacteria	Firmicutes_A	c__Clostridia	o__4C28d-15	f__CAG-727	g__	s__	f__CAG-727	f__CAG-727:100429	33301	23699	NA	NA	24262	NA	23990	NA	NA	22294	0.0267221	0.019017	NA	NA	0.0194688	NA	0.0192506	NA	NA	0.0178896	3	dmp;lld2_fsk;500fg_fsk;300tzfg
100431	1659746	67	1348243	1485654	4148	d__Bacteria	Firmicutes	c__Bacilli	o__RFN20	f__CAG-288	g__CAG-345	s__	g__CAG-345	g__CAG-345:100431	18623	14638	NA	NA	16911	NA	2662	NA	NA	NA	0.0138128	0.0108571	NA	NA	0.012543	NA	0.00197442	NA	NA	NA	3	dmp;lld2_fsk;500fg_fsk
100451	1842661	15	1431477	1642848	4763	d__Bacteria	Bacteroidota	c__Bacteroidia	o__Flavobacteriales	f__	g__	s__	o__Flavobacteriales	o__Flavobacteriales:100451	44750	40757	NA	NA	42014	NA	27115	NA	NA	NA	0.0312614	0.028472	NA	NA	0.0293501	NA	0.018942	NA	NA	NA	3	dmp;lld2_fsk;500fg_fsk
100457	3105289	22	1369007	2765868	9226	d__Bacteria	Firmicutes_A	c__Clostridia	o__Oscillospirales	f__DTU089	g__	s__	f__DTU089	f__DTU089:100457	7531	2970	NA	NA	2694	NA	6127	NA	NA	NA	0.00550107	0.00216946	NA	NA	0.00196785	NA	0.00447551	NA	NA	NA	3	dmp;lld2_fsk;500fg_fsk
100475	1691728	49	1234559	1521546	6650	d__Bacteria	Proteobacteria	c__Gammaproteobacteria	o__Betaproteobacteriales	f__Burkholderiaceae	g__	s__	f__Burkholderiaceae	f__Burkholderiaceae:100475	12610	NA	NA	NA	NA	NA	NA	NA	NA	12610	0.0102142	NA	NA	NA	NA	NA	NA	NA	NA	0.0102142	0	300tzfg
100484	2562995	295	1836361	2356911	10926	d__Bacteria	Firmicutes_A	c__Clostridia	o__Lachnospirales	f__Lachnospiraceae	g__Butyrivibrio_A	s__GCA_000431815.1	s__GCA_000431815.1	s__GCA_000431815.1:100484	21552	NA	NA	NA	NA	NA	NA	NA	NA	21552	0.0117363	NA	NA	NA	NA	NA	NA	NA	NA	0.0117363	0	300tzfg
100519	1614144	81	1278773	1465179	11649	d__Bacteria	Elusimicrobiota	c__Elusimicrobia	o__Elusimicrobiales	f__Elusimicrobiaceae	g__UBA1436	s__	g__UBA1436	g__UBA1436:100519	43308	NA	NA	NA	NA	NA	NA	NA	NA	43308	0.0338668	NA	NA	NA	NA	NA	NA	NA	NA	0.0338668	0	300tzfg
100530	2214259	621	1656056	1911750	9078	d__Bacteria	Firmicutes_A	c__Clostridia	o__Christensenellales	f__CAG-138	g__PeH17	s__PeH17 sp1	s__PeH17 sp1	s__PeH17 sp1:100530	50172	34030	28666	33033	34890	10824	29939	34620	NA	30198	0.0302961	0.0205488	0.0173098	0.0199468	0.0210681	0.00653601	0.0180785	0.0209051	NA	0.0182349	6	dmp;lld1;lld2_apk;lld2_fsk;500fg_apk;500fg_fsk;300ob;300tzfg
100532	2745821	100	1988575	2484660	17514	d__Bacteria	Firmicutes_A	c__Clostridia	o__Lachnospirales	f__Lachnospiraceae	g__CAG-510	s__GCA_000434615.1	s__GCA_000434615.1	s__GCA_000434615.1:100532	77420	NA	NA	NA	NA	NA	NA	NA	NA	77420	0.0389324	NA	NA	NA	NA	NA	NA	NA	NA	0.0389324	0	300tzfg
100534	3142227	58	1882770	2671911	14057	d__Bacteria	Bacteroidota	c__Bacteroidia	o__Bacteroidales	f__Bacteroidaceae	g__Prevotella	s__	g__Prevotella	g__Prevotella:100534	43300	NA	NA	NA	NA	NA	NA	NA	NA	43300	0.022998	NA	NA	NA	NA	NA	NA	NA	NA	0.022998	0	300tzfg
100537	2340074	10	1945217	2038524	2766	d__Bacteria	Firmicutes_A	c__Clostridia	o__Oscillospirales	f__Ruminococcaceae	g__	s__	f__Ruminococcaceae	f__Ruminococcaceae:100537	26921	16722	NA	NA	23322	NA	9815	NA	NA	4559	0.0138396	0.00859647	NA	NA	0.0119894	NA	0.00504571	NA	NA	0.0023437	3	dmp;lld2_fsk;500fg_fsk;300tzfg
100538	3608297	52	2974373	3334428	8106	d__Bacteria	Verrucomicrobiota	c__Lentisphaeria	o__UBA1784	f__	g__	s__	o__UBA1784	o__UBA1784:100538	72778	NA	NA	NA	NA	NA	NA	NA	NA	72778	0.0244684	NA	NA	NA	NA	NA	NA	NA	NA	0.0244684	0	300tzfg
100539	2370364	24	1625029	2019294	10072	d__Bacteria	Firmicutes_A	c__Clostridia	o__Lachnospirales	f__Lachnospiraceae	g__Oribacterium	s__	g__Oribacterium	g__Oribacterium:100539	19290	NA	NA	NA	NA	NA	NA	NA	NA	19290	0.0118706	NA	NA	NA	NA	NA	NA	NA	NA	0.0118706	0	300tzfg
100561	2687682	45	1949463	2390748	11382	d__Bacteria	Firmicutes_A	c__Clostridia	o__Oscillospirales	f__Ruminococcaceae	g__CAG-115	s__	g__CAG-115	g__CAG-115:100561	33606	NA	NA	NA	NA	NA	NA	NA	NA	33606	0.0172386	NA	NA	NA	NA	NA	NA	NA	NA	0.0172386	0	300tzfg
100562	2986625	534	2224455	2663247	16427	d__Bacteria	Firmicutes_A	c__Clostridia	o__Lachnospirales	f__Lachnospiraceae	g__Lachnospira	s__GCA_000437735.1	s__GCA_000437735.1	s__GCA_000437735.1:100562	21443	10504	9932	13126	12018	12457	12978	12795	12258	15820	0.00963966	0.00472206	0.00446491	0.00590077	0.00540267	0.00560002	0.00583424	0.00575197	0.00551056	0.00711185	6	dmp;lld1;lld2_apk;lld2_fsk;500fg_apk;500fg_fsk;300ob;ibd;300tzfg
100575	5125744	12	3514865	4601016	8079	d__Bacteria	Verrucomicrobiota	c__Lentisphaeria	o__UBA1784	f__	g__	s__	o__UBA1784	o__UBA1784:100575	56278	50810	NA	NA	49481	NA	47612	NA	NA	44147	0.0160114	0.0144557	NA	NA	0.0140776	NA	0.0135459	NA	NA	0.0125601	3	dmp;lld2_fsk;500fg_fsk;300tzfg
100600	2643551	60	1817605	2380824	11784	d__Bacteria	Firmicutes_A	c__Clostridia	o__Lachnospirales	f__Lachnospiraceae	g__CAG-791	s__GCA_000431495.1	s__GCA_000431495.1	s__GCA_000431495.1:100600	59915	NA	NA	NA	NA	NA	NA	NA	NA	59915	0.0329637	NA	NA	NA	NA	NA	NA	NA	NA	0.0329637	0	300tzfg
100602	2001964	14	1413340	1744521	5847	d__Bacteria	Actinobacteriota	c__Coriobacteriia	o__Coriobacteriales	f__Eggerthellaceae	g__CAG-1427	s__	g__CAG-1427	g__CAG-1427:100602	22674	NA	NA	NA	NA	NA	NA	NA	NA	22674	0.0160428	NA	NA	NA	NA	NA	NA	NA	NA	0.0160428	0	300tzfg
100606	3519670	407	2021886	3153597	18085	d__Bacteria	Bacteroidota	c__Bacteroidia	o__Bacteroidales	f__UBA932	g__RC9	s__GCA_000433355.1	s__GCA_000433355.1	s__GCA_000433355.1:100606	11955	4285	NA	2204	5729	NA	NA	5816	NA	8292	0.0059128	0.00211931	NA	0.00109007	0.00283349	NA	NA	0.00287652	NA	0.00410112	3	dmp;lld2_apk;lld2_fsk;300ob;300tzfg
100631	2606937	83	1803623	2306205	9482	d__Bacteria	Bacteroidota	c__Bacteroidia	o__Bacteroidales	f__Bacteroidaceae	g__Prevotella	s__	g__Prevotella	g__Prevotella:100631	14313	NA	NA	NA	NA	NA	NA	NA	NA	14313	0.00793569	NA	NA	NA	NA	NA	NA	NA	NA	0.00793569	0	300tzfg
100636	2465595	10	1839929	2131770	7456	d__Bacteria	Firmicutes_A	c__Clostridia	o__Oscillospirales	f__Ruminococcaceae	g__Faecalibacterium	s__	g__Faecalibacterium	g__Faecalibacterium:100636	1486	NA	NA	NA	NA	NA	NA	NA	NA	1486	0.00080764	NA	NA	NA	NA	NA	NA	NA	NA	0.00080764	0	300tzfg
100644	3377053	21	1956769	2984532	11311	d__Bacteria	Bacteroidota	c__Bacteroidia	o__Bacteroidales	f__Bacteroidaceae	g__Prevotella	s__	g__Prevotella	g__Prevotella:100644	28104	NA	NA	NA	NA	NA	NA	NA	NA	28104	0.0143625	NA	NA	NA	NA	NA	NA	NA	NA	0.0143625	0	300tzfg
100646	1992948	724	1545766	1798719	9142	d__Bacteria	Firmicutes_A	c__Clostridia	o__Oscillospirales	f__DTU089	g__Eubacterium_R	s__Eubacterium_R sp2	s__Eubacterium_R sp2	s__Eubacterium_R sp2:100646	32395	5708	17887	14589	8832	20058	18009	20852	NA	21600	0.0209572	0.00369267	0.0115716	0.00943804	0.00571367	0.0129761	0.0116505	0.0134898	NA	0.0139737	6	dmp;lld1;lld2_apk;lld2_fsk;500fg_apk;500fg_fsk;300ob;300tzfg
100651	2858234	82	1732763	2489268	16170	d__Bacteria	Firmicutes_A	c__Clostridia	o__Oscillospirales	f__Oscillospiraceae	g__CAG-170	s__	g__CAG-170	g__CAG-170:100651	39797	30428	29630	30192	30621	29711	31493	29847	NA	25650	0.0229674	0.0175604	0.0170999	0.0174242	0.0176718	0.0171466	0.018175	0.0172251	NA	0.0148029	6	dmp;lld1;lld2_apk;lld2_fsk;500fg_apk;500fg_fsk;300ob;300tzfg
100653	2527360	115	2078406	2278884	5583	d__Bacteria	Bacteroidota	c__Bacteroidia	o__Bacteroidales	f__Coprobacteraceae	g__Coprobacter	s__GCA_000434215.1	s__GCA_000434215.1	s__GCA_000434215.1:100653	21839	19222	NA	NA	19246	NA	19652	8128	NA	NA	0.0105076	0.00924843	NA	NA	0.00925998	NA	0.00945532	0.00391069	NA	NA	3	dmp;lld2_fsk;500fg_fsk;300ob
100667	2774972	50	1648297	2472426	7345	d__Bacteria	Bacteroidota	c__Bacteroidia	o__Bacteroidales	f__Muribaculaceae	g__UBA7173	s__	g__UBA7173	g__UBA7173:100667	68038	54768	NA	NA	NA	NA	67041	NA	NA	NA	0.0412778	0.033227	NA	NA	NA	NA	0.0406729	NA	NA	NA	2	dmp;500fg_fsk
100668	2648761	22	1444585	2302449	6691	d__Bacteria	Firmicutes_A	c__Clostridia	o__Peptostreptococcales	f__Anaerovoracaceae	g__CAG-145	s__	g__CAG-145	g__CAG-145:100668	47595	40455	24389	37378	40149	5529	39286	26375	NA	33179	0.0329472	0.0280046	0.016883	0.0258746	0.0277928	0.0038274	0.0271954	0.0182578	NA	0.0229678	6	dmp;lld1;lld2_apk;lld2_fsk;500fg_apk;500fg_fsk;300ob;300tzfg
100669	2346700	163	1871218	2077506	17226	d__Bacteria	Firmicutes_A	c__Clostridia	o__Oscillospirales	f__DTU089	g__CAG-488	s__GCA_000434055.1	s__GCA_000434055.1	s__GCA_000434055.1:100669	31743	NA	NA	NA	NA	NA	NA	NA	NA	31743	0.0169638	NA	NA	NA	NA	NA	NA	NA	NA	0.0169638	0	300tzfg
100672	2557145	122	1878680	2302128	13150	d__Bacteria	Bacteroidota	c__Bacteroidia	o__Bacteroidales	f__UBA932	g__RC9	s__GCA_000431015.1	s__GCA_000431015.1	s__GCA_000431015.1:100672	8596	NA	NA	NA	NA	NA	NA	8596	NA	NA	0.00457555	NA	NA	NA	NA	NA	NA	0.00457555	NA	NA	0	300ob
100690	2970333	29	1950408	2641134	7272	d__Bacteria	Firmicutes_A	c__Clostridia	o__Lachnospirales	f__Lachnospiraceae	g__CAG-590	s__GCA_000431135.1	s__GCA_000431135.1	s__GCA_000431135.1:100690	5039	NA	NA	NA	NA	NA	NA	NA	NA	5039	0.00258356	NA	NA	NA	NA	NA	NA	NA	NA	0.00258356	0	300tzfg
100695	3425624	11	2068222	3026925	5945	d__Bacteria	Bacteroidota	c__Bacteroidia	o__Bacteroidales	f__Bacteroidaceae	g__Prevotella	s__GCA_000436035.1	s__GCA_000436035.1	s__GCA_000436035.1:100695	28148	NA	NA	NA	NA	NA	NA	NA	NA	28148	0.0136098	NA	NA	NA	NA	NA	NA	NA	NA	0.0136098	0	300tzfg
100696	3249525	36	2357817	2916591	7786	d__Bacteria	Bacteroidota	c__Bacteroidia	o__Bacteroidales	f__Tannerellaceae	g__Parabacteroides	s__	g__Parabacteroides	g__Parabacteroides:100696	28362	NA	NA	NA	NA	NA	NA	NA	NA	28362	0.0120289	NA	NA	NA	NA	NA	NA	NA	NA	0.0120289	0	300tzfg
100700	3017854	34	2278070	2619978	13578	d__Bacteria	Bacteroidota	c__Bacteroidia	o__Bacteroidales	f__Bacteroidaceae	g__Paraprevotella	s__	g__Paraprevotella	g__Paraprevotella:100700	43964	NA	NA	NA	NA	NA	NA	NA	NA	43964	0.0192988	NA	NA	NA	NA	NA	NA	NA	NA	0.0192988	0	300tzfg
100701	3061545	11	1925548	2649693	8661	d__Bacteria	Bacteroidota	c__Bacteroidia	o__Bacteroidales	f__Bacteroidaceae	g__Prevotella	s__	g__Prevotella	g__Prevotella:100701	6460	NA	NA	NA	NA	NA	NA	NA	NA	6460	0.00335489	NA	NA	NA	NA	NA	NA	NA	NA	0.00335489	0	300tzfg
100707	3151200	15	1888027	2743200	13302	d__Bacteria	Bacteroidota	c__Bacteroidia	o__Bacteroidales	f__Bacteroidaceae	g__Prevotella	s__	g__Prevotella	g__Prevotella:100707	17596	NA	NA	NA	NA	NA	NA	NA	NA	17596	0.00931978	NA	NA	NA	NA	NA	NA	NA	NA	0.00931978	0	300tzfg
100715	3165572	19	1541166	2716596	6220	d__Bacteria	Firmicutes_A	c__Clostridia	o__Oscillospirales	f__Oscillospiraceae	g__	s__	f__Oscillospiraceae	f__Oscillospiraceae:100715	8255	NA	NA	NA	NA	NA	NA	NA	NA	8255	0.00535633	NA	NA	NA	NA	NA	NA	NA	NA	0.00535633	0	300tzfg
100723	2217780	1000	1727825	1966167	19864	d__Bacteria	Firmicutes_A	c__Clostridia	o__Oscillospirales	f__DTU089	g__CAG-177	s__	g__CAG-177	g__CAG-177:100723	49724	36037	35690	35775	35376	33912	35733	36542	1626	34546	0.0287784	0.0208569	0.020656	0.0207052	0.0204743	0.019627	0.0206809	0.0211491	0.000941068	0.0199939	6	dmp;lld1;lld2_apk;lld2_fsk;500fg_apk;500fg_fsk;300ob;ibd;300tzfg
100725	2245731	453	1229716	1710348	10771	d__Bacteria	Firmicutes_C	c__Negativicutes	o__Veillonellales	f__Dialisteraceae	g__Dialister	s__Dialister sp1	s__Dialister sp1	s__Dialister sp1:100725	1711	NA	NA	NA	NA	NA	NA	NA	NA	1711	0.00139138	NA	NA	NA	NA	NA	NA	NA	NA	0.00139138	0	300tzfg
100730	2331521	340	1554246	2094585	18117	d__Bacteria	Firmicutes_A	c__Clostridia	o__Christensenellales	f__CAG-138	g__Phil1	s__GCA_001940855.1	s__GCA_001940855.1	s__GCA_001940855.1:100730	78172	59905	46985	58196	58403	12324	53070	56652	NA	56615	0.0502958	0.0385428	0.0302301	0.0374432	0.0375764	0.00792925	0.0341452	0.0364498	NA	0.036426	6	dmp;lld1;lld2_apk;lld2_fsk;500fg_apk;500fg_fsk;300ob;300tzfg
100734	2420240	32	1348751	2106792	5443	d__Bacteria	Firmicutes_A	c__Clostridia	o__4C28d-15	f__CAG-727	g__UBA10281	s__	g__UBA10281	g__UBA10281:100734	41622	27487	NA	NA	26057	NA	22415	NA	NA	28062	0.0308597	0.0203796	NA	NA	0.0193194	NA	0.0166191	NA	NA	0.0208059	3	dmp;lld2_fsk;500fg_fsk;300tzfg
100741	2479900	17	1499764	2122854	7660	d__Bacteria	Firmicutes_A	c__Clostridia	o__Oscillospirales	f__Oscillospiraceae	g__CAG-170	s__	g__CAG-170	g__CAG-170:100741	1376	NA	NA	NA	NA	NA	NA	NA	NA	1376	0.000917478	NA	NA	NA	NA	NA	NA	NA	NA	0.000917478	0	300tzfg
100743	2812564	278	1561641	2456178	23845	d__Bacteria	Firmicutes_A	c__Clostridia	o__Oscillospirales	f__Oscillospiraceae	g__CAG-110	s__GCA_000434635.1	s__GCA_000434635.1	s__GCA_000434635.1:100743	32640	24066	22786	23364	23793	20853	23988	23421	NA	22188	0.0209011	0.0154107	0.0145911	0.0149612	0.0152359	0.0133533	0.0153608	0.0149977	NA	0.0142081	6	dmp;lld1;lld2_apk;lld2_fsk;500fg_apk;500fg_fsk;300ob;300tzfg
100773	2067002	51	1536691	1866633	11159	d__Bacteria	Firmicutes	c__Bacilli	o__Erysipelotrichales	f__Erysipelotrichaceae	g__	s__	f__Erysipelotrichaceae	f__Erysipelotrichaceae:100773	46505	NA	NA	NA	NA	NA	NA	31008	NA	24577	0.0302631	NA	NA	NA	NA	NA	NA	0.0201784	NA	0.0159935	0	300ob;300tzfg
100836	1971744	25	1351226	1771893	9327	d__Bacteria	Firmicutes_A	c__Clostridia	o__4C28d-15	f__CAG-727	g__UBA10281	s__GCA_000437515.1	s__GCA_000437515.1	s__GCA_000437515.1:100836	54475	NA	NA	NA	NA	NA	NA	NA	NA	54475	0.0403152	NA	NA	NA	NA	NA	NA	NA	NA	0.0403152	0	300tzfg
100839	2806522	38	2195036	2367435	5521	d__Bacteria	Firmicutes_A	c__Clostridia	o__Clostridiales	f__Clostridiaceae	g__Clostridium	s__	g__Clostridium	g__Clostridium:100839	14419	NA	11506	11554	NA	5318	NA	6887	NA	5331	0.00656891	NA	0.00524183	0.00526369	NA	0.00242274	NA	0.00313753	NA	0.00242866	3	lld1;lld2_apk;500fg_apk;300ob;300tzfg
100875	2172726	14	1607030	1914459	4290	d__Bacteria	Firmicutes_A	c__Clostridia	o__Christensenellales	f__CAG-138	g__CAG-1024	s__GCA_000432015.1	s__GCA_000432015.1	s__GCA_000432015.1:100875	9993	NA	NA	NA	NA	NA	NA	NA	NA	9993	0.0062183	NA	NA	NA	NA	NA	NA	NA	NA	0.0062183	0	300tzfg
100877	2190601	37	1380234	1938084	7104	d__Bacteria	Firmicutes_A	c__Clostridia	o__Oscillospirales	f__Oscillospiraceae	g__CAG-83	s__	g__CAG-83	g__CAG-83:100877	35076	3305	NA	NA	2345	NA	2039	1297	NA	34383	0.0254131	0.00239452	NA	NA	0.00169899	NA	0.00147729	0.000939696	NA	0.024911	3	dmp;lld2_fsk;500fg_fsk;300ob;300tzfg
100884	2064464	23	1589748	1834266	10435	d__Bacteria	Firmicutes_A	c__Clostridia	o__Oscillospirales	f__Oscillospiraceae	g__CAG-103	s__	g__CAG-103	g__CAG-103:100884	1919	NA	NA	NA	NA	NA	NA	NA	NA	1919	0.00120711	NA	NA	NA	NA	NA	NA	NA	NA	0.00120711	0	300tzfg
100933	1571031	140	1213279	1402539	5752	d__Bacteria	Firmicutes_A	c__Clostridia	o__4C28d-15	f__CAG-314	g__CAG-314	s__GCA_000437915.1	s__GCA_000437915.1	s__GCA_000437915.1:100933	24493	23629	NA	NA	22923	NA	NA	NA	NA	NA	0.0201874	0.0194753	NA	NA	0.0188934	NA	NA	NA	NA	NA	2	dmp;lld2_fsk
101021	2762458	56	1897507	2381058	6980	d__Bacteria	Firmicutes_A	c__Clostridia	o__Oscillospirales	f__Ruminococcaceae	g__Ruminococcus_C	s__GCA_000980705.1	s__GCA_000980705.1	s__GCA_000980705.1:101021	23608	9037	13534	17126	13115	18329	19218	19631	NA	11622	0.0124416	0.00476256	0.00713252	0.00902553	0.0069117	0.00965952	0.010128	0.0103457	NA	0.00612488	6	dmp;lld1;lld2_apk;lld2_fsk;500fg_apk;500fg_fsk;300ob;300tzfg
101029	2058114	771	1544294	1860855	10982	d__Bacteria	Firmicutes_A	c__Clostridia	o__Oscillospirales	f__DTU089	g__CAG-217	s__CAG-217 sp1	s__CAG-217 sp1	s__CAG-217 sp1:101029	65535	31985	33283	36985	36251	34701	34364	32579	34889	44465	0.0424369	0.0207117	0.0215522	0.0239495	0.0234742	0.0224705	0.0222522	0.0210964	0.0225922	0.0287931	6	dmp;lld1;lld2_apk;lld2_fsk;500fg_apk;500fg_fsk;300ob;ibd;300tzfg
101057	2192208	54	1492232	1910637	8617	d__Bacteria	Firmicutes_A	c__Clostridia	o__Oscillospirales	f__Ruminococcaceae	g__Negativibacillus	s__GCA_000435195.1	s__GCA_000435195.1	s__GCA_000435195.1:101057	46443	2502	NA	11787	11900	NA	NA	44410	NA	NA	0.0311232	0.00167668	NA	0.00789891	0.00797463	NA	NA	0.0297608	NA	NA	3	dmp;lld2_apk;lld2_fsk;300ob
101060	2737434	24	1674039	2282649	3692	d__Bacteria	Firmicutes_C	c__Negativicutes	o__Veillonellales	f__Dialisteraceae	g__Dialister	s__GCA_000435155.1	s__GCA_000435155.1	s__GCA_000435155.1:101060	7886	NA	NA	NA	NA	NA	NA	NA	NA	7886	0.00471076	NA	NA	NA	NA	NA	NA	NA	NA	0.00471076	0	300tzfg
101085	3069105	116	1652650	2821278	15768	d__Bacteria	Bacteroidota	c__Bacteroidia	o__Bacteroidales	f__UBA932	g__RC9	s__GCA_000434935.1	s__GCA_000434935.1	s__GCA_000434935.1:101085	13064	NA	NA	NA	NA	NA	NA	NA	NA	13064	0.00790488	NA	NA	NA	NA	NA	NA	NA	NA	0.00790488	0	300tzfg
101097	3685936	42	2137307	3152307	10558	d__Bacteria	Bacteroidota	c__Bacteroidia	o__Bacteroidales	f__Bacteroidaceae	g__Prevotella	s__Prevotella sp17	s__Prevotella sp17	s__Prevotella sp17:101097	3588	NA	NA	NA	NA	NA	NA	NA	NA	3588	0.00167875	NA	NA	NA	NA	NA	NA	NA	NA	0.00167875	0	300tzfg
101120	2572497	19	1504687	2249295	6728	d__Bacteria	Firmicutes_A	c__Clostridia	o__Oscillospirales	f__Butyricicoccaceae	g__UBA4224	s__	g__UBA4224	g__UBA4224:101120	46158	NA	11341	36352	NA	NA	NA	28217	NA	4012	0.0306761	NA	0.00753712	0.0241592	NA	NA	NA	0.0187527	NA	0.00266634	2	lld1;lld2_apk;300ob;300tzfg
101136	2086579	169	1555448	1850208	19107	d__Bacteria	Firmicutes_A	c__Clostridia	o__Oscillospirales	f__Oscillospiraceae	g__CAG-103	s__	g__CAG-103	g__CAG-103:101136	31436	20025	17757	21809	22316	14515	18183	23836	NA	20852	0.0202103	0.0128741	0.011416	0.014021	0.014347	0.00933172	0.0116899	0.0153242	NA	0.0134058	6	dmp;lld1;lld2_apk;lld2_fsk;500fg_apk;500fg_fsk;300ob;300tzfg
101151	2711757	113	1481832	2321514	17477	d__Bacteria	Firmicutes_A	c__Clostridia	o__Oscillospirales	f__Ruminococcaceae	g__Ruminococcus_C	s__GCA_000433635.1	s__GCA_000433635.1	s__GCA_000433635.1:101151	87942	29114	64624	66808	22235	66045	60109	65043	NA	74027	0.0593468	0.0196473	0.0436109	0.0450847	0.0150051	0.0445698	0.040564	0.0438936	NA	0.0499564	6	dmp;lld1;lld2_apk;lld2_fsk;500fg_apk;500fg_fsk;300ob;300tzfg
101156	3469049	15	2514395	3064695	8495	d__Bacteria	Firmicutes_A	c__Clostridia	o__Christensenellales	f__CAG-74	g__	s__	f__CAG-74	f__CAG-74:101156	39709	NA	NA	NA	NA	NA	NA	NA	NA	39709	0.0157927	NA	NA	NA	NA	NA	NA	NA	NA	0.0157927	0	300tzfg
101157	2709061	72	1818159	2346531	13408	d__Bacteria	Firmicutes_A	c__Clostridia	o__Oscillospirales	f__Ruminococcaceae	g__Subdoligranulum	s__	g__Subdoligranulum	g__Subdoligranulum:101157	48064	33371	33159	33529	33494	32757	34716	33685	NA	26994	0.0264355	0.0183543	0.0182377	0.0184412	0.0184219	0.0180166	0.019094	0.018527	NA	0.0148469	6	dmp;lld1;lld2_apk;lld2_fsk;500fg_apk;500fg_fsk;300ob;300tzfg
101160	2295318	43	1765283	2002224	7076	d__Bacteria	Firmicutes_A	c__Clostridia	o__Lachnospirales	f__CAG-274	g__CAG-274	s__GCA_000432155.1	s__GCA_000432155.1	s__GCA_000432155.1:101160	7201	NA	2845	1443	NA	4988	NA	4084	NA	NA	0.00407923	NA	0.00161164	0.000817433	NA	0.00282561	NA	0.00231351	NA	NA	3	lld1;lld2_apk;500fg_apk;300ob
101167	1681400	19	1256237	1483401	3920	d__Bacteria	Actinobacteriota	c__Coriobacteriia	o__Coriobacteriales	f__Eggerthellaceae	g__CAG-1427	s__GCA_000434775.1	s__GCA_000434775.1	s__GCA_000434775.1:101167	23935	NA	4919	18189	NA	NA	NA	16711	NA	NA	0.0190529	NA	0.00391566	0.014479	NA	NA	NA	0.0133024	NA	NA	2	lld1;lld2_apk;300ob
101168	1980319	88	1336494	1713735	12417	d__Bacteria	Actinobacteriota	c__Coriobacteriia	o__Coriobacteriales	f__Eggerthellaceae	g__CAG-1427	s__GCA_000436075.1	s__GCA_000436075.1	s__GCA_000436075.1:101168	51996	26122	40791	40302	27283	40863	25780	40936	38326	NA	0.0389048	0.0195452	0.0305209	0.030155	0.0204139	0.0305748	0.0192893	0.0306294	0.0286765	NA	6	dmp;lld1;lld2_apk;lld2_fsk;500fg_apk;500fg_fsk;300ob;ibd
101186	4173483	13	2100803	3574059	5793	d__Bacteria	Firmicutes_A	c__Clostridia	o__Lachnospirales	f__Lachnospiraceae	g__Agathobacter	s__	g__Agathobacter	g__Agathobacter:101186	16673	NA	NA	NA	NA	NA	NA	NA	NA	16673	0.00793649	NA	NA	NA	NA	NA	NA	NA	NA	0.00793649	0	300tzfg
101191	2407292	12	1785523	2149089	4765	d__Bacteria	Firmicutes_A	c__Clostridia	o__Peptostreptococcales	f__Anaerovoracaceae	g__	s__	f__Anaerovoracaceae	f__Anaerovoracaceae:101191	80594	NA	29731	40814	NA	1799	NA	32512	NA	71969	0.0451375	NA	0.0166511	0.0228583	NA	0.00100755	NA	0.0182087	NA	0.040307	3	lld1;lld2_apk;500fg_apk;300ob;300tzfg
101230	1880579	21	1469796	1712217	6965	d__Bacteria	Firmicutes_A	c__Clostridia	o__Oscillospirales	f__DTU089	g__Eubacterium_R	s__	g__Eubacterium_R	g__Eubacterium_R:101230	1195	NA	NA	NA	NA	NA	NA	NA	NA	1195	0.000813038	NA	NA	NA	NA	NA	NA	NA	NA	0.000813038	0	300tzfg
101244	2780797	34	1387525	2505459	15301	d__Bacteria	Firmicutes_A	c__Clostridia	o__Oscillospirales	f__DTU089	g__	s__	f__DTU089	f__DTU089:101244	40953	19219	NA	2019	26248	NA	26485	1794	NA	25084	0.0295151	0.0138513	NA	0.00145511	0.0189171	NA	0.0190879	0.00129295	NA	0.0180782	4	dmp;lld2_apk;lld2_fsk;500fg_fsk;300ob;300tzfg
101246	3263842	62	1977066	2840670	11400	d__Bacteria	Firmicutes_A	c__Clostridia	o__Lachnospirales	f__Lachnospiraceae	g__Clostridium_M	s__	g__Clostridium_M	g__Clostridium_M:101246	32001	NA	4532	9845	NA	20738	22521	20995	3529	19677	0.0161861	NA	0.00229229	0.0049796	NA	0.0104893	0.0113911	0.0106193	0.00178497	0.00995263	4	lld1;lld2_apk;500fg_apk;500fg_fsk;300ob;ibd;300tzfg
101255	2583152	18	1624654	2181984	10560	d__Bacteria	Firmicutes_A	c__Clostridia	o__Oscillospirales	f__Ruminococcaceae	g__Faecalibacterium	s__Faecalibacterium prausnitzii_F	s__Faecalibacterium prausnitzii_F	s__Faecalibacterium prausnitzii_F:101255	37105	27911	18846	23317	26615	12356	28207	21285	NA	32209	0.0228387	0.0171797	0.0116	0.014352	0.0163819	0.00760531	0.0173619	0.0131013	NA	0.0198251	6	dmp;lld1;lld2_apk;lld2_fsk;500fg_apk;500fg_fsk;300ob;300tzfg
101294	2782392	378	1480169	2449371	4456	d__Bacteria	Proteobacteria	c__Gammaproteobacteria	o__Betaproteobacteriales	f__Burkholderiaceae	g__Parasutterella	s__Parasutterella excrementihominis	s__Parasutterella excrementihominis	s__Parasutterella excrementihominis:101294	3912	3709	NA	NA	3722	NA	3586	NA	NA	NA	0.00264294	0.00250579	NA	NA	0.00251458	NA	0.0024227	NA	NA	NA	3	dmp;lld2_fsk;500fg_fsk
101300	3310911	575	1580754	2850774	16174	d__Bacteria	Firmicutes_A	c__Clostridia	o__Oscillospirales	f__Ruminococcaceae	g__Faecalibacterium	s__Faecalibacterium prausnitzii_A	s__Faecalibacterium prausnitzii_A	s__Faecalibacterium prausnitzii_A:101300	4854	3908	3889	3805	3814	3881	3939	3735	3314	4224	0.00307069	0.00247224	0.00246022	0.00240708	0.00241277	0.00245516	0.00249185	0.0023628	0.00209647	0.00267214	6	dmp;lld1;lld2_apk;lld2_fsk;500fg_apk;500fg_fsk;300ob;ibd;300tzfg
101302	3198988	1000	1734689	2676798	7017	d__Bacteria	Bacteroidota	c__Bacteroidia	o__Bacteroidales	f__Rikenellaceae	g__Alistipes	s__Alistipes putredinis	s__Alistipes putredinis	s__Alistipes putredinis:101302	2610	2441	1921	1979	2367	1904	2549	1991	1952	1542	0.00150459	0.00140717	0.0011074	0.00114084	0.00136451	0.0010976	0.00146943	0.00114776	0.00112527	0.00088892	6	dmp;lld1;lld2_apk;lld2_fsk;500fg_apk;500fg_fsk;300ob;ibd;300tzfg
101303	4056916	54	2067184	3689754	4527	d__Bacteria	Firmicutes_A	c__Clostridia	o__Lachnospirales	f__Lachnospiraceae	g__Dorea	s__Dorea scindens	s__Dorea scindens	s__Dorea scindens:101303	70294	NA	NA	NA	NA	NA	NA	NA	70294	NA	0.0340047	NA	NA	NA	NA	NA	NA	NA	0.0340047	NA	0	ibd
101304	2513171	17	1652815	2140656	2709	d__Bacteria	Firmicutes	c__Bacilli	o__Erysipelotrichales	f__Erysipelatoclostridiaceae	g__Erysipelatoclostridium	s__Erysipelatoclostridium spiroforme	s__Erysipelatoclostridium spiroforme	s__Erysipelatoclostridium spiroforme:101304	9929	NA	2925	8175	NA	3465	NA	2929	3903	NA	0.00600733	NA	0.00176971	0.00494611	NA	0.00209642	NA	0.00177213	0.00236143	NA	3	lld1;lld2_apk;500fg_apk;300ob;ibd
101306	3701239	258	2264315	3305745	10330	d__Bacteria	Bacteroidota	c__Bacteroidia	o__Bacteroidales	f__Bacteroidaceae	g__Bacteroides_A	s__Bacteroides_A coprocola	s__Bacteroides_A coprocola	s__Bacteroides_A coprocola:101306	14470	11796	NA	1855	5679	6652	12406	4176	NA	NA	0.00639045	0.00520952	NA	0.000819232	0.00250804	0.00293775	0.00547892	0.00184427	NA	NA	5	dmp;lld2_apk;lld2_fsk;500fg_apk;500fg_fsk;300ob
101310	2731235	159	1578162	2360382	5837	d__Bacteria	Firmicutes_A	c__Clostridia	o__Lachnospirales	f__Lachnospiraceae	g__Ruminococcus_B	s__Ruminococcus_B lactaris	s__Ruminococcus_B lactaris	s__Ruminococcus_B lactaris:101310	8039	5220	5702	5768	5439	5614	5511	5492	5302	5983	0.0050939	0.00330765	0.00361306	0.00365488	0.00344641	0.0035573	0.00349204	0.00348	0.0033596	0.00379112	6	dmp;lld1;lld2_apk;lld2_fsk;500fg_apk;500fg_fsk;300ob;ibd;300tzfg
101313	4586481	157	2466724	4092957	6014	d__Bacteria	Bacteroidota	c__Bacteroidia	o__Bacteroidales	f__Bacteroidaceae	g__Bacteroides	s__Bacteroides eggerthii	s__Bacteroides eggerthii	s__Bacteroides eggerthii:101313	8424	7129	2560	6152	6870	5822	7261	6856	NA	NA	0.00341506	0.00289007	0.00103781	0.002494	0.00278507	0.00236022	0.00294358	0.00277939	NA	NA	6	dmp;lld1;lld2_apk;lld2_fsk;500fg_apk;500fg_fsk;300ob
101315	3434952	84	1691791	3018432	11035	d__Bacteria	Firmicutes_A	c__Clostridia	o__Lachnospirales	f__Lachnospiraceae	g__Coprococcus_B	s__Coprococcus_B comes	s__Coprococcus_B comes	s__Coprococcus_B comes:101315	9087	3080	3464	3622	2854	3824	3876	3589	5868	7579	0.00537123	0.00182056	0.00204753	0.00214093	0.00168697	0.00226033	0.00229106	0.00212142	0.00346851	0.00447987	6	dmp;lld1;lld2_apk;lld2_fsk;500fg_apk;500fg_fsk;300ob;ibd;300tzfg
101316	2574556	46	1400111	2264778	13322	d__Bacteria	Firmicutes_C	c__Negativicutes	o__Selenomonadales	f__Selenomonadaceae	g__Mitsuokella	s__Mitsuokella multacida	s__Mitsuokella multacida	s__Mitsuokella multacida:101316	40025	NA	NA	NA	NA	NA	NA	NA	NA	40025	0.028587	NA	NA	NA	NA	NA	NA	NA	NA	0.028587	0	300tzfg
101319	2496039	742	1683361	2253765	8489	d__Bacteria	Firmicutes_A	c__Clostridia	o__Lachnospirales	f__Lachnospiraceae	g__Butyrivibrio_A	s__Butyrivibrio_A crossotus	s__Butyrivibrio_A crossotus	s__Butyrivibrio_A crossotus:101319	31693	16120	14847	16210	17208	NA	NA	18697	NA	21334	0.0188272	0.00957608	0.00881986	0.00962954	0.0102224	NA	NA	0.0111069	NA	0.0126735	4	dmp;lld1;lld2_apk;lld2_fsk;300ob;300tzfg
101321	2670739	118	1697105	2295090	10568	d__Bacteria	Desulfobacterota	c__Desulfovibrionia	o__Desulfovibrionales	f__Desulfovibrionaceae	g__Desulfovibrio	s__Desulfovibrio piger	s__Desulfovibrio piger	s__Desulfovibrio piger:101321	63831	51971	NA	7388	51743	NA	51069	48157	NA	24374	0.0376117	0.0306233	NA	0.0043533	0.030489	NA	0.0300918	0.028376	NA	0.0143621	4	dmp;lld2_apk;lld2_fsk;500fg_fsk;300ob;300tzfg
101334	2153707	140	1499860	1796064	9874	d__Bacteria	Firmicutes	c__Bacilli	o__Lactobacillales	f__Lactobacillaceae	g__Lactobacillus_B	s__Lactobacillus_B ruminis	s__Lactobacillus_B ruminis	s__Lactobacillus_B ruminis:101334	16475	NA	NA	NA	NA	NA	NA	NA	NA	16475	0.0109844	NA	NA	NA	NA	NA	NA	NA	NA	0.0109844	0	300tzfg
101337	5201070	595	3820306	4603488	11918	d__Bacteria	Bacteroidota	c__Bacteroidia	o__Bacteroidales	f__Bacteroidaceae	g__Bacteroides	s__Bacteroides fragilis	s__Bacteroides fragilis	s__Bacteroides fragilis:101337	7969	5964	1309	3502	5489	4041	6149	4985	5677	5470	0.00208596	0.00156113	0.000342643	0.00091668	0.0014368	0.00105777	0.00160956	0.00130487	0.00148601	0.00143182	6	dmp;lld1;lld2_apk;lld2_fsk;500fg_apk;500fg_fsk;300ob;ibd;300tzfg
101342	2231411	21	1528362	1980252	2489	d__Bacteria	Firmicutes	c__Bacilli	o__Lactobacillales	f__Streptococcaceae	g__Streptococcus	s__Streptococcus gordonii	s__Streptococcus gordonii	s__Streptococcus gordonii:101342	5720	NA	NA	NA	NA	NA	NA	1499	4497	2581	0.00374257	NA	NA	NA	NA	NA	NA	0.000980789	0.00294237	0.00168874	0	300ob;ibd;300tzfg
101345	6257788	242	3464893	5605119	23404	d__Bacteria	Bacteroidota	c__Bacteroidia	o__Bacteroidales	f__Bacteroidaceae	g__Bacteroides	s__Bacteroides xylanisolvens	s__Bacteroides xylanisolvens	s__Bacteroides xylanisolvens:101345	2295	1794	NA	1012	1640	1345	2043	1466	NA	1013	0.000662358	0.000517765	NA	0.000292073	0.000473319	0.000388179	0.000589629	0.000423101	NA	0.000292361	5	dmp;lld2_apk;lld2_fsk;500fg_apk;500fg_fsk;300ob;300tzfg
101346	4895468	1000	2966042	4409304	18472	d__Bacteria	Bacteroidota	c__Bacteroidia	o__Bacteroidales	f__Bacteroidaceae	g__Bacteroides	s__Bacteroides uniformis	s__Bacteroides uniformis	s__Bacteroides uniformis:101346	1920	1380	1378	1277	1352	1476	1483	1382	1432	1484	0.000647327	0.000465267	0.000464592	0.00043054	0.000455826	0.000497633	0.000499993	0.000465941	0.000482798	0.00050033	6	dmp;lld1;lld2_apk;lld2_fsk;500fg_apk;500fg_fsk;300ob;ibd;300tzfg
101349	2174425	519	1563797	1908096	21200	d__Bacteria	Firmicutes_C	c__Negativicutes	o__Veillonellales	f__Veillonellaceae	g__Veillonella	s__Veillonella parvula	s__Veillonella parvula	s__Veillonella parvula:101349	32312	NA	NA	NA	NA	NA	NA	NA	31428	5411	0.0206625	NA	NA	NA	NA	NA	NA	NA	0.0200972	0.00346017	0	ibd;300tzfg
101354	2651921	73	1854389	2348763	5168	d__Bacteria	Actinobacteriota	c__Actinobacteria	o__Actinomycetales	f__Bifidobacteriaceae	g__Bifidobacterium	s__Bifidobacterium dentium	s__Bifidobacterium dentium	s__Bifidobacterium dentium:101354	4992	NA	NA	NA	NA	NA	NA	NA	4992	NA	0.00269199	NA	NA	NA	NA	NA	NA	NA	0.00269199	NA	0	ibd
101356	2941019	19	1610301	2583126	8796	d__Bacteria	Firmicutes_A	c__Clostridia	o__Oscillospirales	f__Oscillospiraceae	g__Clostridium_AJ	s__GCF_000177015.3	s__GCF_000177015.3	s__GCF_000177015.3:101356	7861	5553	NA	NA	4434	NA	6481	1302	2013	1071	0.0048817	0.00344842	NA	NA	0.00275352	NA	0.00402471	0.000808544	0.00125008	0.000665093	3	dmp;lld2_fsk;500fg_fsk;300ob;ibd;300tzfg
101359	4391194	358	2682043	3677358	11704	d__Bacteria	Desulfobacterota	c__Desulfovibrionia	o__Desulfovibrionales	f__Desulfovibrionaceae	g__Bilophila	s__Bilophila wadsworthia	s__Bilophila wadsworthia	s__Bilophila wadsworthia:101359	59143	47836	11964	23103	47144	43331	48616	46190	4256	40849	0.0220515	0.0178357	0.00446078	0.00861396	0.0175776	0.016156	0.0181265	0.0172219	0.00158685	0.0152306	6	dmp;lld1;lld2_apk;lld2_fsk;500fg_apk;500fg_fsk;300ob;ibd;300tzfg
101361	2988328	641	1986753	2544693	7881	d__Bacteria	Proteobacteria	c__Gammaproteobacteria	o__Betaproteobacteriales	f__Burkholderiaceae	g__Sutterella	s__Sutterella wadsworthensis	s__Sutterella wadsworthensis	s__Sutterella wadsworthensis:101361	65742	44582	NA	9161	48345	36540	51685	NA	10399	50595	0.0330902	0.0224396	NA	0.00461104	0.0243337	0.0183918	0.0260148	NA	0.00523417	0.0254662	5	dmp;lld2_apk;lld2_fsk;500fg_apk;500fg_fsk;ibd;300tzfg
101362	2180686	43	1371450	1915974	3879	d__Bacteria	Firmicutes	c__Bacilli	o__Lactobacillales	f__Streptococcaceae	g__Streptococcus	s__Streptococcus anginosus	s__Streptococcus anginosus	s__Streptococcus anginosus:101362	1599	NA	NA	NA	NA	NA	NA	NA	1599	NA	0.00116592	NA	NA	NA	NA	NA	NA	NA	0.00116592	NA	0	ibd
101374	2593361	915	1851226	2293467	1526	d__Bacteria	Firmicutes_A	c__Clostridia	o__Lachnospirales	f__Lachnospiraceae	g__Ruminococcus_B	s__Ruminococcus_B torques	s__Ruminococcus_B torques	s__Ruminococcus_B torques:101374	1418	NA	1013	1051	NA	1029	NA	1167	1279	NA	0.000765979	NA	0.000547205	0.000567732	NA	0.000555848	NA	0.000630393	0.000690893	NA	3	lld1;lld2_apk;500fg_apk;300ob;ibd
101375	2511743	24	1667166	2168010	3810	d__Bacteria	Firmicutes_A	c__Clostridia	o__Oscillospirales	f__Ruminococcaceae	g__Ruminococcus_F	s__Ruminococcus_F champanellensis	s__Ruminococcus_F champanellensis	s__Ruminococcus_F champanellensis:101375	36291	NA	NA	NA	NA	NA	NA	NA	NA	36291	0.0217681	NA	NA	NA	NA	NA	NA	NA	NA	0.0217681	0	300tzfg
101379	3233902	23	2018283	2885322	5782	d__Bacteria	Firmicutes_A	c__Clostridia	o__Lachnospirales	f__Lachnospiraceae	g__Ruminococcus_B	s__Ruminococcus_B glycyrrhizinilyticum	s__Ruminococcus_B glycyrrhizinilyticum	s__Ruminococcus_B glycyrrhizinilyticum:101379	11827	NA	NA	NA	NA	NA	NA	NA	11827	NA	0.00585993	NA	NA	NA	NA	NA	NA	NA	0.00585993	NA	0	ibd
101380	4059834	665	1778235	3391017	8395	d__Bacteria	Firmicutes_A	c__Clostridia	o__Lachnospirales	f__Lachnospiraceae	g__Ruminococcus_B	s__Ruminococcus_B gnavus	s__Ruminococcus_B gnavus	s__Ruminococcus_B gnavus:101380	5538	NA	3825	3709	NA	4023	NA	4320	4868	1602	0.00311432	NA	0.00215101	0.00208578	NA	0.00226236	NA	0.00242938	0.00273755	0.000900893	3	lld1;lld2_apk;500fg_apk;300ob;ibd;300tzfg
101385	2934025	81	2089253	2577537	8238	d__Bacteria	Bacteroidota	c__Bacteroidia	o__Bacteroidales	f__Rikenellaceae	g__Alistipes_A	s__Alistipes_A indistinctus	s__Alistipes_A indistinctus	s__Alistipes_A indistinctus:101385	31497	23963	NA	18490	24687	6211	24541	6475	NA	17580	0.0150757	0.0114696	NA	0.00885005	0.0118162	0.00297283	0.0117463	0.00309919	NA	0.00841449	5	dmp;lld2_apk;lld2_fsk;500fg_apk;500fg_fsk;300ob;300tzfg
101386	5586056	98	3351386	4805196	6566	d__Bacteria	Firmicutes_A	c__Clostridia	o__Lachnospirales	f__Lachnospiraceae	g__Clostridium_M	s__Clostridium_M clostridioformis	s__Clostridium_M clostridioformis	s__Clostridium_M clostridioformis:101386	20334	NA	NA	NA	NA	NA	NA	NA	20334	NA	0.00606734	NA	NA	NA	NA	NA	NA	NA	0.00606734	NA	0	ibd
101387	2398022	27	1451114	1988214	11514	d__Bacteria	Actinobacteriota	c__Coriobacteriia	o__Coriobacteriales	f__Eggerthellaceae	g__Senegalimassilia	s__Senegalimassilia anaerobia	s__Senegalimassilia anaerobia	s__Senegalimassilia anaerobia:101387	99489	10500	66075	67653	18345	53931	25936	65719	26397	72112	0.0685604	0.00723582	0.045534	0.0466214	0.012642	0.0371652	0.0178732	0.0452887	0.0181909	0.0496942	6	dmp;lld1;lld2_apk;lld2_fsk;500fg_apk;500fg_fsk;300ob;ibd;300tzfg
101391	3767218	148	2701993	3331020	13902	d__Bacteria	Bacteroidota	c__Bacteroidia	o__Bacteroidales	f__Coprobacteraceae	g__Coprobacter	s__Coprobacter fastidiosus	s__Coprobacter fastidiosus	s__Coprobacter fastidiosus:101391	69778	53848	NA	NA	51220	NA	53557	30744	NA	NA	0.0258246	0.019929	NA	NA	0.0189564	NA	0.0198213	0.0113783	NA	NA	3	dmp;lld2_fsk;500fg_fsk;300ob
101396	4986473	147	3187034	4207803	8669	d__Bacteria	Firmicutes	c__Bacilli	o__Erysipelotrichales	f__Erysipelotrichaceae	g__Eubacterium_D	s__Eubacterium_D innocuum	s__Eubacterium_D innocuum	s__Eubacterium_D innocuum:101396	50481	NA	NA	NA	NA	NA	NA	NA	50481	NA	0.0158395	NA	NA	NA	NA	NA	NA	NA	0.0158395	NA	0	ibd
101400	3764055	346	2804959	3280242	3547	d__Bacteria	Firmicutes	c__Bacilli	o__Erysipelotrichales	f__Erysipelatoclostridiaceae	g__Erysipelatoclostridium	s__Erysipelatoclostridium ramosum	s__Erysipelatoclostridium ramosum	s__Erysipelatoclostridium ramosum:101400	7785	NA	NA	NA	NA	NA	NA	NA	7785	NA	0.00277544	NA	NA	NA	NA	NA	NA	NA	0.00277544	NA	0	ibd
101410	2921038	434	1661468	2418267	5654	d__Bacteria	Proteobacteria	c__Gammaproteobacteria	o__Betaproteobacteriales	f__Burkholderiaceae	g__Sutterella	s__Sutterella sp3	s__Sutterella sp3	s__Sutterella sp3:101410	18605	10457	NA	1200	10302	4439	10136	8620	NA	11749	0.0111979	0.00629383	NA	0.000722253	0.00620054	0.00267173	0.00610063	0.00518818	NA	0.00707146	5	dmp;lld2_apk;lld2_fsk;500fg_apk;500fg_fsk;300ob;300tzfg
101415	2959753	289	2079999	2605551	9175	d__Bacteria	Bacteroidota	c__Bacteroidia	o__Bacteroidales	f__Rikenellaceae	g__Alistipes	s__Alistipes obesi	s__Alistipes obesi	s__Alistipes obesi:101415	7746	6679	6175	6613	6708	6616	6737	6795	4747	5454	0.00372404	0.00321106	0.00296875	0.00317933	0.003225	0.00318077	0.00323894	0.00326683	0.00228221	0.00262212	6	dmp;lld1;lld2_apk;lld2_fsk;500fg_apk;500fg_fsk;300ob;ibd;300tzfg
101420	4017609	11	2275907	3626400	4059	d__Bacteria	Bacteroidota	c__Bacteroidia	o__Bacteroidales	f__Rikenellaceae	g__Alistipes	s__Alistipes senegalensis	s__Alistipes senegalensis	s__Alistipes senegalensis:101420	32804	27114	NA	17482	27703	3851	27028	8710	NA	24306	0.0144136	0.0119135	NA	0.00768133	0.0121723	0.00169207	0.0118757	0.00382705	NA	0.0106797	5	dmp;lld2_apk;lld2_fsk;500fg_apk;500fg_fsk;300ob;300tzfg
101429	2762293	166	2123205	2328432	10748	d__Bacteria	Bacteroidota	c__Bacteroidia	o__Bacteroidales	f__Rikenellaceae	g__Alistipes_A	s__Alistipes_A ihumii	s__Alistipes_A ihumii	s__Alistipes_A ihumii:101429	47933	37999	28329	38861	40408	21361	37371	30014	5724	NA	0.0225758	0.017897	0.0133426	0.018303	0.0190316	0.0100607	0.0176012	0.0141362	0.00269592	NA	6	dmp;lld1;lld2_apk;lld2_fsk;500fg_apk;500fg_fsk;300ob;ibd
101433	5455251	17	3675235	4891542	4921	d__Bacteria	Bacteroidota	c__Bacteroidia	o__Bacteroidales	f__Bacteroidaceae	g__Bacteroides	s__Bacteroides salyersiae	s__Bacteroides salyersiae	s__Bacteroides salyersiae:101433	17059	10678	NA	NA	3637	NA	16392	NA	NA	NA	0.00464161	0.00290539	NA	NA	0.000989597	NA	0.00446012	NA	NA	NA	3	dmp;lld2_fsk;500fg_fsk
101439	3189119	52	1875748	2838876	7898	d__Bacteria	Firmicutes_A	c__Clostridia	o__Lachnospirales	f__Lachnospiraceae	g__Tyzzerella	s__Tyzzerella sp1	s__Tyzzerella sp1	s__Tyzzerella sp1:101439	23535	NA	NA	NA	NA	NA	NA	NA	23535	NA	0.012547	NA	NA	NA	NA	NA	NA	NA	0.012547	NA	0	ibd
101444	2073390	121	1376889	1821804	16101	d__Bacteria	Firmicutes_C	c__Negativicutes	o__Veillonellales	f__Veillonellaceae	g__Veillonella	s__Veillonella atypica	s__Veillonella atypica	s__Veillonella atypica:101444	36914	NA	NA	NA	NA	NA	NA	NA	36040	2380	0.0268097	NA	NA	NA	NA	NA	NA	NA	0.0261749	0.00172853	0	ibd;300tzfg
101455	1868578	40	1332527	1695750	4501	d__Bacteria	Firmicutes	c__Bacilli	o__Erysipelotrichales	f__Erysipelotrichaceae	g__Faecalitalea	s__Faecalitalea cylindroides	s__Faecalitalea cylindroides	s__Faecalitalea cylindroides:101455	15144	NA	14264	4485	NA	NA	NA	NA	NA	NA	0.0113649	NA	0.0107045	0.00336579	NA	NA	NA	NA	NA	NA	2	lld1;lld2_apk
101456	3307376	30	1972798	2865984	7447	d__Bacteria	Firmicutes_A	c__Clostridia	o__Lachnospirales	f__Lachnospiraceae	g__Eubacterium_I	s__Eubacterium_I ramulus	s__Eubacterium_I ramulus	s__Eubacterium_I ramulus:101456	35029	4345	27141	27166	5385	26997	21765	27444	26738	21313	0.017756	0.00220246	0.0137576	0.0137703	0.00272963	0.0136846	0.0110326	0.0139112	0.0135533	0.0108034	6	dmp;lld1;lld2_apk;lld2_fsk;500fg_apk;500fg_fsk;300ob;ibd;300tzfg
101489	6486757	31	4215391	5843496	18315	d__Bacteria	Bacteroidota	c__Bacteroidia	o__Bacteroidales	f__Tannerellaceae	g__Parabacteroides	s__Parabacteroides goldsteinii	s__Parabacteroides goldsteinii	s__Parabacteroides goldsteinii:101489	22549	4467	NA	NA	13592	NA	2679	NA	NA	10630	0.00534921	0.00105969	NA	NA	0.00322437	NA	0.000635528	NA	NA	0.00252171	3	dmp;lld2_fsk;500fg_fsk;300tzfg
101490	2082756	85	1410374	1808967	10173	d__Bacteria	Actinobacteriota	c__Actinobacteria	o__Actinomycetales	f__Bifidobacteriaceae	g__Bifidobacterium	s__Bifidobacterium catenulatum	s__Bifidobacterium catenulatum	s__Bifidobacterium catenulatum:101490	4544	NA	3429	3229	NA	3422	2997	NA	NA	NA	0.00322184	NA	0.00243127	0.00228946	NA	0.00242631	0.00212497	NA	NA	NA	4	lld1;lld2_apk;500fg_apk;500fg_fsk
101493	6604884	205	4000650	5814126	15151	d__Bacteria	Firmicutes_A	c__Clostridia	o__Lachnospirales	f__Lachnospiraceae	g__Clostridium_M	s__Clostridium_M bolteae	s__Clostridium_M bolteae	s__Clostridium_M bolteae:101493	26071	NA	NA	NA	NA	NA	NA	NA	26071	NA	0.00651669	NA	NA	NA	NA	NA	NA	NA	0.00651669	NA	0	ibd
101500	4282156	26	1710481	3644484	3630	d__Bacteria	Firmicutes_A	c__Clostridia	o__Oscillospirales	f__Oscillospiraceae	g__Clostridium_AJ	s__Clostridium_AJ phoceensis	s__Clostridium_AJ phoceensis	s__Clostridium_AJ phoceensis:101500	17664	15775	14796	15237	15577	11163	15761	15186	14924	NA	0.0103269	0.00922255	0.0086502	0.00890802	0.0091068	0.00652623	0.00921437	0.0088782	0.00872503	NA	6	dmp;lld1;lld2_apk;lld2_fsk;500fg_apk;500fg_fsk;300ob;ibd
101531	2921889	146	2218979	2642853	7633	d__Bacteria	Firmicutes_A	c__Clostridia	o__Lachnospirales	f__Lachnospiraceae	g__Clostridium_M	s__GCF_001517625.2	s__GCF_001517625.2	s__GCF_001517625.2:101531	8104	NA	NA	NA	NA	NA	NA	NA	8104	NA	0.00365213	NA	NA	NA	NA	NA	NA	NA	0.00365213	NA	0	ibd
101565	2153717	82	1570580	1914828	16150	d__Bacteria	Firmicutes_A	c__Clostridia	o__Oscillospirales	f__Oscillospiraceae	g__CAG-103	s__	g__CAG-103	g__CAG-103:101565	18549	14838	6710	14158	14815	4574	14658	9099	NA	3683	0.0118103	0.00944747	0.00427231	0.0090145	0.00943282	0.0029123	0.00933286	0.0057934	NA	0.00234499	6	dmp;lld1;lld2_apk;lld2_fsk;500fg_apk;500fg_fsk;300ob;300tzfg
101627	2511293	58	1673501	2209818	10745	d__Bacteria	Firmicutes_A	c__Clostridia	o__Oscillospirales	f__Ruminococcaceae	g__Subdoligranulum	s__	g__Subdoligranulum	g__Subdoligranulum:101627	28340	18662	18744	18664	18125	17427	18056	18648	14228	16842	0.0169346	0.0111515	0.0112005	0.0111527	0.0108306	0.0104135	0.0107894	0.0111431	0.00850194	0.0100639	6	dmp;lld1;lld2_apk;lld2_fsk;500fg_apk;500fg_fsk;300ob;ibd;300tzfg
101633	3012996	128	1858846	2712732	19393	d__Bacteria	Bacteroidota	c__Bacteroidia	o__Bacteroidales	f__UBA932	g__RC9	s__GCA_000435075.1	s__GCA_000435075.1	s__GCA_000435075.1:101633	36708	NA	NA	NA	NA	NA	NA	NA	NA	36708	0.0197477	NA	NA	NA	NA	NA	NA	NA	NA	0.0197477	0	300tzfg
101637	2619564	43	1950745	2348280	14155	d__Bacteria	Firmicutes_A	c__Clostridia	o__Lachnospirales	f__Lachnospiraceae	g__Agathobacter	s__	g__Agathobacter	g__Agathobacter:101637	3041	NA	NA	NA	NA	NA	NA	NA	NA	3041	0.00155889	NA	NA	NA	NA	NA	NA	NA	NA	0.00155889	0	300tzfg
101655	3999742	14	2823405	3623883	980	d__Bacteria	Bacteroidota	c__Bacteroidia	o__Bacteroidales	f__Marinifilaceae	g__Butyricimonas	s__	g__Butyricimonas	g__Butyricimonas:101655	21288	2814	NA	NA	6744	NA	18800	NA	NA	10663	0.00753983	0.000996669	NA	NA	0.00238861	NA	0.00665863	NA	NA	0.00377665	3	dmp;lld2_fsk;500fg_fsk;300tzfg
101704	3127194	58	1830624	2787543	6758	d__Bacteria	Firmicutes_A	c__Clostridia	o__Lachnospirales	f__Lachnospiraceae	g__Blautia	s__Blautia hansenii	s__Blautia hansenii	s__Blautia hansenii:101704	52694	NA	NA	NA	NA	NA	NA	NA	52694	NA	0.0287847	NA	NA	NA	NA	NA	NA	NA	0.0287847	NA	0	ibd
101711	2417470	230	1412942	2164011	15806	d__Bacteria	Firmicutes	c__Bacilli	o__Erysipelotrichales	f__Erysipelotrichaceae	g__Holdemanella	s__Holdemanella biformis	s__Holdemanella biformis	s__Holdemanella biformis:101711	18795	NA	9645	11062	NA	4460	NA	11945	NA	12781	0.013302	NA	0.00682618	0.00782905	NA	0.00315653	NA	0.00845399	NA	0.00904567	3	lld1;lld2_apk;500fg_apk;300ob;300tzfg
101714	3679359	67	1902550	3226173	9975	d__Bacteria	Firmicutes_A	c__Clostridia	o__Lachnospirales	f__Lachnospiraceae	g__Coprococcus_A	s__Coprococcus_A catus	s__Coprococcus_A catus	s__Coprococcus_A catus:101714	60122	8093	31247	31893	11235	32377	29803	33158	33843	45518	0.0316007	0.00425376	0.0164237	0.0167633	0.00590523	0.0170177	0.0156648	0.0174282	0.0177882	0.0239247	6	dmp;lld1;lld2_apk;lld2_fsk;500fg_apk;500fg_fsk;300ob;ibd;300tzfg
101737	2041299	448	1488659	1835055	7463	d__Bacteria	Firmicutes_A	c__Clostridia	o__Oscillospirales	f__DTU089	g__Eubacterium_R	s__GCA_000434995.1	s__GCA_000434995.1	s__GCA_000434995.1:101737	30622	NA	19425	19401	2246	19702	18049	20887	NA	5575	0.0205702	NA	0.0130487	0.0130325	0.00150874	0.0132347	0.0121243	0.0140307	NA	0.00374498	5	lld1;lld2_apk;lld2_fsk;500fg_apk;500fg_fsk;300ob;300tzfg
101757	2518713	26	1505364	2234187	3678	d__Bacteria	Firmicutes_A	c__Clostridia	o__Oscillospirales	f__Ruminococcaceae	g__Ruminococcus	s__	g__Ruminococcus	g__Ruminococcus:101757	19073	NA	NA	NA	NA	NA	NA	NA	NA	19073	0.01267	NA	NA	NA	NA	NA	NA	NA	NA	0.01267	0	300tzfg
101763	2810238	152	1707719	2443530	17784	d__Bacteria	Bacteroidota	c__Bacteroidia	o__Bacteroidales	f__Bacteroidaceae	g__Prevotella	s__GCA_000434975.1	s__GCA_000434975.1	s__GCA_000434975.1:101763	35220	NA	NA	NA	NA	NA	NA	NA	NA	35220	0.020624	NA	NA	NA	NA	NA	NA	NA	NA	0.020624	0	300tzfg
101770	3460198	136	1643396	2937144	11191	d__Bacteria	Bacteroidota	c__Bacteroidia	o__Bacteroidales	f__Bacteroidaceae	g__Prevotella	s__Prevotella sp13	s__Prevotella sp13	s__Prevotella sp13:101770	36168	5112	NA	NA	5385	NA	2542	14042	NA	25176	0.0220081	0.00311063	NA	NA	0.00327675	NA	0.0015468	0.0085445	NA	0.0153195	3	dmp;lld2_fsk;500fg_fsk;300ob;300tzfg
101830	3011462	369	2215053	2689197	13139	d__Bacteria	Bacteroidota	c__Bacteroidia	o__Bacteroidales	f__Rikenellaceae	g__Alistipes	s__Alistipes finegoldii	s__Alistipes finegoldii	s__Alistipes finegoldii:101830	5949	4759	3031	4433	4729	4119	4777	4234	2561	3344	0.00268571	0.00214848	0.00136836	0.00200131	0.00213494	0.00185955	0.00215661	0.00191147	0.00115618	0.00150967	6	dmp;lld1;lld2_apk;lld2_fsk;500fg_apk;500fg_fsk;300ob;ibd;300tzfg
101831	4842819	26	2157615	4184295	8460	d__Bacteria	Firmicutes_A	c__Clostridia	o__Lachnospirales	f__Lachnospiraceae	g__TF01-11	s__GCA_000436755.1	s__GCA_000436755.1	s__GCA_000436755.1:101831	19756	NA	NA	1039	NA	NA	NA	NA	NA	19467	0.00915641	NA	NA	0.00048155	NA	NA	NA	NA	NA	0.00902246	1	lld2_apk;300tzfg
101848	2299159	40	1855093	2111940	6094	d__Bacteria	Firmicutes_A	c__Clostridia	o__Lachnospirales	f__Lachnospiraceae	g__Eubacterium_F	s__GCA_000433735.1	s__GCA_000433735.1	s__GCA_000433735.1:101848	38954	10898	12700	21780	17563	3966	21378	19785	NA	25437	0.0209984	0.00587464	0.00684602	0.0117407	0.00946745	0.0021379	0.011524	0.0106652	NA	0.013712	6	dmp;lld1;lld2_apk;lld2_fsk;500fg_apk;500fg_fsk;300ob;300tzfg
101855	2595273	52	2052138	2362662	8738	d__Bacteria	Firmicutes_A	c__Clostridia	o__Lachnospirales	f__Lachnospiraceae	g__CAG-632	s__GCA_000431515.1	s__GCA_000431515.1	s__GCA_000431515.1:101855	15800	NA	NA	NA	NA	NA	NA	NA	NA	15800	0.00769929	NA	NA	NA	NA	NA	NA	NA	NA	0.00769929	0	300tzfg
101866	3006939	403	1681958	2554038	11190	d__Bacteria	Bacteroidota	c__Bacteroidia	o__Bacteroidales	f__Bacteroidaceae	g__Prevotella	s__	g__Prevotella	g__Prevotella:101866	59785	35895	NA	27222	37914	9635	37633	40373	NA	36898	0.0355449	0.0213412	NA	0.0161847	0.0225416	0.00572844	0.0223745	0.0240036	NA	0.0219375	5	dmp;lld2_apk;lld2_fsk;500fg_apk;500fg_fsk;300ob;300tzfg
101919	2244998	24	1616758	1992663	13982	d__Bacteria	Firmicutes_A	c__Clostridia	o__Oscillospirales	f__Oscillospiraceae	g__F23-B02	s__	g__F23-B02	g__F23-B02:101919	2378	NA	NA	NA	NA	NA	NA	NA	NA	2378	0.00147084	NA	NA	NA	NA	NA	NA	NA	NA	0.00147084	0	300tzfg
101940	2223650	13	1631404	1937610	4063	d__Bacteria	Firmicutes_A	c__Clostridia	o__Oscillospirales	f__Ruminococcaceae	g__	s__	f__Ruminococcaceae	f__Ruminococcaceae:101940	20560	NA	NA	NA	NA	NA	NA	NA	NA	20560	0.0126026	NA	NA	NA	NA	NA	NA	NA	NA	0.0126026	0	300tzfg
101963	3511445	54	2134800	3105756	19013	d__Bacteria	Bacteroidota	c__Bacteroidia	o__Bacteroidales	f__Bacteroidaceae	g__Bacteroides_A	s__GCA_000434735.1	s__GCA_000434735.1	s__GCA_000434735.1:101963	49855	NA	NA	NA	NA	NA	NA	NA	NA	49855	0.0233535	NA	NA	NA	NA	NA	NA	NA	NA	0.0233535	0	300tzfg
101975	3207644	14	1842204	2850831	10763	d__Bacteria	Bacteroidota	c__Bacteroidia	o__Bacteroidales	f__Bacteroidaceae	g__Prevotella	s__	g__Prevotella	g__Prevotella:101975	5539	NA	NA	NA	NA	NA	NA	NA	NA	5539	0.00300672	NA	NA	NA	NA	NA	NA	NA	NA	0.00300672	0	300tzfg
102001	2269278	143	1783735	2042913	14486	d__Bacteria	Firmicutes_A	c__Clostridia	o__Oscillospirales	f__DTU089	g__CAG-177	s__GCA_000431775.1	s__GCA_000431775.1	s__GCA_000431775.1:102001	44883	NA	NA	NA	NA	NA	NA	NA	NA	44883	0.0251624	NA	NA	NA	NA	NA	NA	NA	NA	0.0251624	0	300tzfg
102007	2702620	30	2012129	2428344	4336	d__Bacteria	Bacteroidota	c__Bacteroidia	o__Bacteroidales	f__Rikenellaceae	g__Alistipes	s__	g__Alistipes	g__Alistipes:102007	18746	16308	NA	2055	15872	NA	15407	4711	NA	NA	0.0093165	0.00810485	NA	0.00102131	0.00788816	NA	0.00765706	0.0023413	NA	NA	4	dmp;lld2_apk;lld2_fsk;500fg_fsk;300ob
102021	1981593	240	1524667	1693518	7433	d__Bacteria	Proteobacteria	c__Alphaproteobacteria	o__RF32	f__CAG-239	g__51-20	s__GCA_001917175.1	s__GCA_001917175.1	s__GCA_001917175.1:102021	17734	16128	NA	NA	16748	NA	14794	NA	NA	NA	0.0116314	0.010578	NA	NA	0.0109847	NA	0.0097031	NA	NA	NA	3	dmp;lld2_fsk;500fg_fsk
102040	2612973	78	1511006	2215536	11262	d__Bacteria	Firmicutes_A	c__Clostridia	o__Oscillospirales	f__Ruminococcaceae	g__Faecalibacterium	s__	g__Faecalibacterium	g__Faecalibacterium:102040	24833	14866	14389	15093	14911	14491	14996	14679	9691	15362	0.0164347	0.00983848	0.00952279	0.00998871	0.00986826	0.0095903	0.00992451	0.00971472	0.00641361	0.0101667	6	dmp;lld1;lld2_apk;lld2_fsk;500fg_apk;500fg_fsk;300ob;ibd;300tzfg
102057	2831112	238	1377864	2415891	17669	d__Bacteria	Firmicutes_A	c__Clostridia	o__Oscillospirales	f__Oscillospiraceae	g__Oscillibacter	s__GCA_001916835.1	s__GCA_001916835.1	s__GCA_001916835.1:102057	27468	22794	20485	21189	22890	21022	22831	21446	9214	23822	0.0199352	0.016543	0.0148672	0.0153782	0.0166127	0.0152569	0.0165699	0.0155647	0.00668716	0.0172891	6	dmp;lld1;lld2_apk;lld2_fsk;500fg_apk;500fg_fsk;300ob;ibd;300tzfg
102060	2352723	70	1747316	2044995	18593	d__Bacteria	Firmicutes_A	c__Clostridia	o__Oscillospirales	f__Oscillospiraceae	g__	s__	f__Oscillospiraceae	f__Oscillospiraceae:102060	50446	39304	32321	37686	39135	30495	39500	36429	20306	35708	0.0288706	0.0224939	0.0184975	0.0215679	0.0223972	0.0174525	0.0226061	0.0208485	0.0116213	0.0204359	6	dmp;lld1;lld2_apk;lld2_fsk;500fg_apk;500fg_fsk;300ob;ibd;300tzfg
102072	2856300	76	1854524	2491140	10593	d__Bacteria	Firmicutes_A	c__Clostridia	o__Christensenellales	f__CAG-74	g__	s__	f__CAG-74	f__CAG-74:102072	82968	48455	46376	50603	49316	38506	48587	48862	2848	58527	0.0447382	0.026128	0.025007	0.0272862	0.0265923	0.0207633	0.0261992	0.0263475	0.0015357	0.031559	6	dmp;lld1;lld2_apk;lld2_fsk;500fg_apk;500fg_fsk;300ob;ibd;300tzfg
102101	2607062	33	1547061	2233107	3397	d__Bacteria	Proteobacteria	c__Gammaproteobacteria	o__Betaproteobacteriales	f__Burkholderiaceae	g__Sutterella	s__	g__Sutterella	g__Sutterella:102101	60870	47636	NA	NA	20802	NA	58158	NA	NA	NA	0.0393456	0.0307913	NA	NA	0.0134461	NA	0.0375926	NA	NA	NA	3	dmp;lld2_fsk;500fg_fsk
102108	3033647	69	1807954	2668212	11935	d__Bacteria	Bacteroidota	c__Bacteroidia	o__Bacteroidales	f__Bacteroidaceae	g__Prevotella	s__	g__Prevotella	g__Prevotella:102108	43136	NA	NA	NA	NA	NA	NA	NA	NA	43136	0.023859	NA	NA	NA	NA	NA	NA	NA	NA	0.023859	0	300tzfg
102113	2316208	101	1530343	2059722	14531	d__Bacteria	Firmicutes_C	c__Negativicutes	o__Selenomonadales	f__Selenomonadaceae	g__Anaerovibrio	s__	g__Anaerovibrio	g__Anaerovibrio:102113	15055	NA	NA	NA	NA	NA	NA	NA	NA	15055	0.00983766	NA	NA	NA	NA	NA	NA	NA	NA	0.00983766	0	300tzfg
102133	2924637	50	1870523	2592534	15274	d__Bacteria	Bacteroidota	c__Bacteroidia	o__Bacteroidales	f__Bacteroidaceae	g__Prevotella	s__GCA_000436915.1	s__GCA_000436915.1	s__GCA_000436915.1:102133	66009	NA	NA	NA	NA	NA	NA	NA	NA	66009	0.0352891	NA	NA	NA	NA	NA	NA	NA	NA	0.0352891	0	300tzfg
102135	2740278	10	2155630	2338182	3152	d__Bacteria	Firmicutes_A	c__Clostridia	o__Oscillospirales	f__DTU089	g__Anaeromassilibacillus	s__GCF_002159845.1	s__GCF_002159845.1	s__GCF_002159845.1:102135	46303	33260	26732	33868	28870	NA	43896	3453	29842	NA	0.02148	0.0154294	0.012401	0.0157114	0.0133928	NA	0.0203634	0.00160185	0.0138437	NA	5	dmp;lld1;lld2_apk;lld2_fsk;500fg_fsk;300ob;ibd
102143	2344717	55	1537069	2071416	10297	d__Bacteria	Firmicutes_A	c__Clostridia	o__Oscillospirales	f__Oscillospiraceae	g__CAG-83	s__	g__CAG-83	g__CAG-83:102143	45607	35016	31415	34204	36574	28700	35061	33482	NA	5278	0.0296714	0.022781	0.0204382	0.0222527	0.0237946	0.0186719	0.0228103	0.021783	NA	0.00343381	6	dmp;lld1;lld2_apk;lld2_fsk;500fg_apk;500fg_fsk;300ob;300tzfg
102155	2379587	19	1610289	2076498	4022	d__Bacteria	Firmicutes_A	c__Clostridia	o__Oscillospirales	f__Ruminococcaceae	g__Ruthenibacterium	s__	g__Ruthenibacterium	g__Ruthenibacterium:102155	9960	NA	5114	4158	NA	NA	4454	NA	1187	NA	0.00618523	NA	0.00317583	0.00258215	NA	NA	0.00276596	NA	0.000737135	NA	3	lld1;lld2_apk;500fg_fsk;ibd
102163	1829437	506	1354082	1621878	4635	d__Archaea	Euryarchaeota	c__Methanobacteria	o__Methanobacteriales	f__Methanobacteriaceae	g__Methanobrevibacter_A	s__GCF_000016525.1	s__GCF_000016525.1	s__GCF_000016525.1:102163	11154	NA	6711	6763	NA	6738	NA	6747	1041	7479	0.00823732	NA	0.00495613	0.00499453	NA	0.00497606	NA	0.00498271	0.000768787	0.0055233	3	lld1;lld2_apk;500fg_apk;300ob;ibd;300tzfg
102190	2637503	14	1896648	2309577	2461	d__Bacteria	Firmicutes_A	c__Clostridia	o__Clostridiales	f__Clostridiaceae	g__Clostridium	s__Clostridium sp1	s__Clostridium sp1	s__Clostridium sp1:102190	20835	NA	19016	18499	NA	9809	NA	9459	5100	12818	0.0109852	NA	0.0100261	0.00975352	NA	0.00517176	NA	0.00498722	0.00268895	0.00675824	3	lld1;lld2_apk;500fg_apk;300ob;ibd;300tzfg
102191	1803903	133	1384627	1611483	2362	d__Bacteria	Firmicutes	c__Bacilli	o__ML615J-28	f__CAG-313	g__CAG-313	s__GCA_000433035.1	s__GCA_000433035.1	s__GCA_000433035.1:102191	8662	7896	NA	NA	7626	NA	NA	NA	NA	NA	0.00625584	0.00570262	NA	NA	0.00550762	NA	NA	NA	NA	NA	2	dmp;lld2_fsk
102238	1977606	11	1359088	1693473	3475	d__Bacteria	Firmicutes_A	c__Clostridia	o__Oscillospirales	f__Oscillospiraceae	g__	s__	f__Oscillospiraceae	f__Oscillospiraceae:102238	11043	NA	NA	NA	NA	NA	NA	NA	NA	11043	0.0081253	NA	NA	NA	NA	NA	NA	NA	NA	0.0081253	0	300tzfg
102242	2447049	71	1799657	2222112	6401	d__Bacteria	Spirochaetota	c__Spirochaetia	o__Treponematales	f__Treponemataceae	g__Treponema_D	s__Treponema_D succinifaciens	s__Treponema_D succinifaciens	s__Treponema_D succinifaciens:102242	19413	NA	NA	NA	NA	NA	NA	NA	NA	19413	0.0107871	NA	NA	NA	NA	NA	NA	NA	NA	0.0107871	0	300tzfg
102272	3067445	574	1693050	2594463	13863	d__Bacteria	Firmicutes_A	c__Clostridia	o__Oscillospirales	f__Ruminococcaceae	g__Faecalibacterium	s__Faecalibacterium prausnitzii_D	s__Faecalibacterium prausnitzii_D	s__Faecalibacterium prausnitzii_D:102272	1828	1323	1264	1316	1333	1279	1371	1232	1181	1332	0.00107971	0.00078143	0.000746582	0.000777295	0.000787336	0.000755441	0.000809781	0.000727681	0.000697558	0.000786746	6	dmp;lld1;lld2_apk;lld2_fsk;500fg_apk;500fg_fsk;300ob;ibd;300tzfg
102274	2395345	51	1727951	2084172	5615	d__Bacteria	Firmicutes_A	c__Clostridia	o__Oscillospirales	f__Ruminococcaceae	g__Faecalibacterium	s__GCA_000434595.1	s__GCA_000434595.1	s__GCA_000434595.1:102274	23286	13390	12939	13426	13384	13994	14099	13032	11466	15222	0.0134761	0.00774906	0.00748806	0.0077699	0.00774559	0.00809861	0.00815937	0.00754188	0.0066356	0.00880928	6	dmp;lld1;lld2_apk;lld2_fsk;500fg_apk;500fg_fsk;300ob;ibd;300tzfg
102279	3411049	95	1688540	3034065	12693	d__Bacteria	Firmicutes_A	c__Clostridia	o__Lachnospirales	f__Lachnospiraceae	g__Dorea	s__Dorea longicatena_B	s__Dorea longicatena_B	s__Dorea longicatena_B:102279	7647	NA	4509	4490	NA	4622	3406	4681	4732	5797	0.00452876	NA	0.00267035	0.0026591	NA	0.00273728	0.00201713	0.00277222	0.00280242	0.00343314	4	lld1;lld2_apk;500fg_apk;500fg_fsk;300ob;ibd;300tzfg
102281	6203341	49	4072024	5532687	4631	d__Bacteria	Bacteroidota	c__Bacteroidia	o__Bacteroidales	f__Bacteroidaceae	g__Bacteroides	s__Bacteroides faecis	s__Bacteroides faecis	s__Bacteroides faecis:102281	14459	1322	NA	NA	2801	7730	14102	NA	NA	NA	0.00355081	0.000324654	NA	NA	0.000687864	0.00189832	0.00346314	NA	NA	NA	4	dmp;lld2_fsk;500fg_apk;500fg_fsk
102285	2962824	41	1937661	2710923	10374	d__Bacteria	Firmicutes_A	c__Clostridia	o__Lachnospirales	f__Lachnospiraceae	g__CAG-95	s__GCA_900066375.1	s__GCA_900066375.1	s__GCA_900066375.1:102285	74340	24433	NA	18486	23737	NA	37713	6211	NA	49008	0.0383658	0.0126095	NA	0.00954037	0.0122503	NA	0.0194632	0.00320541	NA	0.0252923	4	dmp;lld2_apk;lld2_fsk;500fg_fsk;300ob;300tzfg
102286	3362050	39	1981653	2971212	8115	d__Bacteria	Firmicutes_A	c__Clostridia	o__Lachnospirales	f__Lachnospiraceae	g__Blautia	s__GCA_000436935.1	s__GCA_000436935.1	s__GCA_000436935.1:102286	34090	NA	9046	19477	NA	22755	NA	20035	NA	22911	0.0172028	NA	0.00456488	0.00982866	NA	0.0114828	NA	0.0101102	NA	0.0115616	3	lld1;lld2_apk;500fg_apk;300ob;300tzfg
102287	3072050	45	1517807	2615070	8303	d__Bacteria	Firmicutes_A	c__Clostridia	o__Oscillospirales	f__Butyricicoccaceae	g__Agathobaculum	s__	g__Agathobaculum	g__Agathobaculum:102287	52812	25949	24947	26487	26347	27139	28302	26452	4655	41526	0.0347949	0.0170964	0.0164362	0.0174508	0.0173586	0.0178804	0.0186466	0.0174278	0.00306692	0.0273592	6	dmp;lld1;lld2_apk;lld2_fsk;500fg_apk;500fg_fsk;300ob;ibd;300tzfg
102289	2644330	107	1856640	2306286	10517	d__Bacteria	Firmicutes_A	c__Clostridia	o__Lachnospirales	f__Lachnospiraceae	g__Coprococcus	s__GCA_000433075.1	s__GCA_000433075.1	s__GCA_000433075.1:102289	6282	NA	NA	NA	NA	NA	NA	NA	NA	6282	0.00338353	NA	NA	NA	NA	NA	NA	NA	NA	0.00338353	0	300tzfg
102292	3183099	215	1975707	2736408	9286	d__Bacteria	Firmicutes_A	c__Clostridia	o__Lachnospirales	f__Lachnospiraceae	g__TF01-11	s__TF01-11 sp1	s__TF01-11 sp1	s__TF01-11 sp1:102292	25016	15080	14427	17572	16904	15707	14991	14502	11617	16149	0.0126618	0.00763271	0.0073022	0.00889403	0.00855592	0.00795007	0.00758766	0.00734016	0.00587992	0.00817378	6	dmp;lld1;lld2_apk;lld2_fsk;500fg_apk;500fg_fsk;300ob;ibd;300tzfg
102293	4191995	1000	1910456	3519048	12187	d__Bacteria	Bacteroidota	c__Bacteroidia	o__Bacteroidales	f__Bacteroidaceae	g__Prevotella	s__Prevotella copri	s__Prevotella copri	s__Prevotella copri:102293	26346	13527	12201	13439	14627	13593	19485	15582	5551	15806	0.0137904	0.00708051	0.00638643	0.00703445	0.00765629	0.00711506	0.0101991	0.00815617	0.00290559	0.00827342	6	dmp;lld1;lld2_apk;lld2_fsk;500fg_apk;500fg_fsk;300ob;ibd;300tzfg
102295	2854896	112	1737936	2427141	14210	d__Bacteria	Firmicutes_A	c__Clostridia	o__Oscillospirales	f__Ruminococcaceae	g__Ruminococcus_C	s__Ruminococcus_C callidus	s__Ruminococcus_C callidus	s__Ruminococcus_C callidus:102295	55979	20223	30951	31147	25902	29336	27077	31050	2520	41545	0.03221	0.0116362	0.0178091	0.0179218	0.0149039	0.0168798	0.01558	0.017866	0.00145	0.0239048	6	dmp;lld1;lld2_apk;lld2_fsk;500fg_apk;500fg_fsk;300ob;ibd;300tzfg
102297	3138856	51	2196031	2777484	11062	d__Bacteria	Firmicutes_A	c__Clostridia	o__Lachnospirales	f__Lachnospiraceae	g__TF01-11	s__GCA_000438095.1	s__GCA_000438095.1	s__GCA_000438095.1:102297	31776	NA	NA	NA	NA	NA	NA	NA	NA	31776	0.0144697	NA	NA	NA	NA	NA	NA	NA	NA	0.0144697	0	300tzfg
102298	4042273	11	1924460	3574707	2931	d__Bacteria	Firmicutes_A	c__Clostridia	o__Lachnospirales	f__Lachnospiraceae	g__Blautia_A	s__GCA_000436615.1	s__GCA_000436615.1	s__GCA_000436615.1:102298	43174	NA	39570	40721	NA	39273	NA	39496	6326	40281	0.0224343	NA	0.0205616	0.0211597	NA	0.0204073	NA	0.0205232	0.00328716	0.0209311	3	lld1;lld2_apk;500fg_apk;300ob;ibd;300tzfg
102302	1807342	12	1349599	1527372	4545	d__Bacteria	Firmicutes	c__Bacilli	o__Lactobacillales	f__Streptococcaceae	g__Streptococcus	s__Streptococcus vestibularis	s__Streptococcus vestibularis	s__Streptococcus vestibularis:102302	2348	NA	NA	NA	NA	NA	NA	NA	2348	NA	0.00173978	NA	NA	NA	NA	NA	NA	NA	0.00173978	NA	0	ibd
102321	2955301	1000	1971802	2579310	19303	d__Bacteria	Firmicutes_A	c__Clostridia	o__Oscillospirales	f__Ruminococcaceae	g__Ruminococcus_D	s__Ruminococcus_D bicirculans	s__Ruminococcus_D bicirculans	s__Ruminococcus_D bicirculans:102321	52413	32326	32451	32748	32619	32616	32080	32257	31939	33268	0.0265813	0.0163941	0.0164575	0.0166082	0.0165427	0.0165412	0.0162694	0.0163591	0.0161979	0.0168719	6	dmp;lld1;lld2_apk;lld2_fsk;500fg_apk;500fg_fsk;300ob;ibd;300tzfg
102327	3346315	208	1839301	2860851	4566	d__Bacteria	Firmicutes_A	c__Clostridia	o__Oscillospirales	f__Oscillospiraceae	g__Oscillibacter	s__Oscillibacter sp6	s__Oscillibacter sp6	s__Oscillibacter sp6:102327	7641	6564	6191	6307	6579	5436	6681	6339	6270	3318	0.0041543	0.00356875	0.00336595	0.00342902	0.0035769	0.00295547	0.00363236	0.00344642	0.0034089	0.00180395	6	dmp;lld1;lld2_apk;lld2_fsk;500fg_apk;500fg_fsk;300ob;ibd;300tzfg
102336	2656480	373	1504203	2212362	9734	d__Bacteria	Firmicutes_C	c__Negativicutes	o__Veillonellales	f__Megasphaeraceae	g__Megasphaera	s__Megasphaera sp2	s__Megasphaera sp2	s__Megasphaera sp2:102336	12623	NA	NA	NA	NA	NA	NA	NA	NA	12623	0.00839182	NA	NA	NA	NA	NA	NA	NA	NA	0.00839182	0	300tzfg
102340	3221608	17	2216293	2846967	3840	d__Bacteria	Firmicutes_A	c__Clostridia	o__Oscillospirales	f__Oscillospiraceae	g__Intestinimonas	s__Intestinimonas butyriciproducens	s__Intestinimonas butyriciproducens	s__Intestinimonas butyriciproducens:102340	30591	29372	NA	NA	28453	NA	29164	NA	NA	NA	0.0138028	0.0132528	NA	NA	0.0128381	NA	0.0131589	NA	NA	NA	3	dmp;lld2_fsk;500fg_fsk
102371	2420604	373	1896906	2100342	4521	d__Bacteria	Bacteroidota	c__Bacteroidia	o__Bacteroidales	f__Rikenellaceae	g__Tidjanibacter	s__Tidjanibacter massiliensis	s__Tidjanibacter massiliensis	s__Tidjanibacter massiliensis:102371	23210	18115	15636	20521	20663	NA	19845	17952	8214	NA	0.0122357	0.00954976	0.0082429	0.0108181	0.010893	NA	0.0104618	0.00946383	0.00433021	NA	5	dmp;lld1;lld2_apk;lld2_fsk;500fg_fsk;300ob;ibd
102393	3163473	13	1823255	2798622	6741	d__Bacteria	Firmicutes_A	c__Clostridia	o__Lachnospirales	f__Lachnospiraceae	g__Dorea	s__Dorea faecis	s__Dorea faecis	s__Dorea faecis:102393	2552	NA	NA	NA	NA	NA	NA	NA	2552	NA	0.00139969	NA	NA	NA	NA	NA	NA	NA	0.00139969	NA	0	ibd
102395	2339702	1000	1435410	2047380	6149	d__Bacteria	Actinobacteriota	c__Actinobacteria	o__Actinomycetales	f__Bifidobacteriaceae	g__Bifidobacterium	s__Bifidobacterium adolescentis_B	s__Bifidobacterium adolescentis_B	s__Bifidobacterium adolescentis_B:102395	1301	1096	1139	1133	1091	1157	1109	1121	1112	NA	0.000906361	0.000763545	0.000793502	0.000789322	0.000760062	0.000806041	0.000772602	0.000780962	0.000774692	NA	6	dmp;lld1;lld2_apk;lld2_fsk;500fg_apk;500fg_fsk;300ob;ibd
102396	2264336	637	1789913	1939764	6665	d__Bacteria	Actinobacteriota	c__Actinobacteria	o__Actinomycetales	f__Bifidobacteriaceae	g__Bifidobacterium	s__Bifidobacterium bifidum	s__Bifidobacterium bifidum	s__Bifidobacterium bifidum:102396	8653	6126	6954	6433	5532	7094	6985	5711	6944	NA	0.00483431	0.00342251	0.00388511	0.00359403	0.00309065	0.00396332	0.00390242	0.00319066	0.00387952	NA	6	dmp;lld1;lld2_apk;lld2_fsk;500fg_apk;500fg_fsk;300ob;ibd
102397	2021974	16	1500574	1752024	3689	d__Bacteria	Actinobacteriota	c__Actinobacteria	o__Actinomycetales	f__Bifidobacteriaceae	g__Bifidobacterium	s__Bifidobacterium angulatum	s__Bifidobacterium angulatum	s__Bifidobacterium angulatum:102397	11307	NA	NA	NA	NA	11307	NA	NA	NA	NA	0.00753512	NA	NA	NA	NA	0.00753512	NA	NA	NA	NA	1	500fg_apk
102412	2861365	42	1990496	2360184	16621	d__Bacteria	Bacteroidota	c__Bacteroidia	o__Bacteroidales	f__Bacteroidaceae	g__Prevotellamassilia	s__Prevotellamassilia timonensis	s__Prevotellamassilia timonensis	s__Prevotellamassilia timonensis:102412	73167	NA	NA	NA	NA	NA	NA	NA	NA	73167	0.0367582	NA	NA	NA	NA	NA	NA	NA	NA	0.0367582	0	300tzfg
102424	2763271	35	1955979	2295639	897	d__Bacteria	Firmicutes_A	c__Clostridia	o__CAG-41	f__	g__	s__	o__CAG-41	o__CAG-41:102424	23958	NA	19511	21858	NA	NA	NA	4358	9360	NA	0.0122486	NA	0.00997506	0.011175	NA	NA	NA	0.00222804	0.00478533	NA	2	lld1;lld2_apk;300ob;ibd
102438	5348683	1000	3361075	4853322	19394	d__Bacteria	Bacteroidota	c__Bacteroidia	o__Bacteroidales	f__Tannerellaceae	g__Parabacteroides	s__Parabacteroides distasonis	s__Parabacteroides distasonis	s__Parabacteroides distasonis:102438	19333	16316	16310	16139	16116	16578	16495	16184	15782	16503	0.00575203	0.0048544	0.00485261	0.00480174	0.00479489	0.00493235	0.00490766	0.00481513	0.00469552	0.00491004	6	dmp;lld1;lld2_apk;lld2_fsk;500fg_apk;500fg_fsk;300ob;ibd;300tzfg
102444	2633333	125	1765057	2358972	7587	d__Bacteria	Firmicutes	c__Bacilli	o__Erysipelotrichales	f__Erysipelatoclostridiaceae	g__Erysipelatoclostridium	s__GCF_001078315.1	s__GCF_001078315.1	s__GCF_001078315.1:102444	10237	NA	8523	5969	NA	6532	NA	3900	NA	NA	0.00579981	NA	0.00482874	0.00338176	NA	0.00370073	NA	0.00220956	NA	NA	3	lld1;lld2_apk;500fg_apk;300ob
102445	3864962	387	1811241	3318390	14484	d__Bacteria	Firmicutes_A	c__Clostridia	o__Lachnospirales	f__Lachnospiraceae	g__Clostridium_Q	s__GCA_000434655.1	s__GCA_000434655.1	s__GCA_000434655.1:102445	9819	4718	4203	4536	5237	5402	5388	4885	4647	7016	0.00542114	0.00260484	0.00232051	0.00250436	0.00289139	0.00298249	0.00297476	0.00269705	0.00256564	0.00387359	6	dmp;lld1;lld2_apk;lld2_fsk;500fg_apk;500fg_fsk;300ob;ibd;300tzfg
102446	1992157	135	1356672	1743210	5580	d__Archaea	Euryarchaeota	c__Methanobacteria	o__Methanobacteriales	f__Methanobacteriaceae	g__Methanobrevibacter_A	s__GCF_002252585.1	s__GCF_002252585.1	s__GCF_002252585.1:102446	1599	NA	NA	NA	NA	NA	NA	1599	NA	NA	0.00117862	NA	NA	NA	NA	NA	NA	0.00117862	NA	NA	0	300ob
102450	2021398	24	1347829	1769649	9398	d__Bacteria	Actinobacteriota	c__Coriobacteriia	o__Coriobacteriales	f__Atopobiaceae	g__	s__	f__Atopobiaceae	f__Atopobiaceae:102450	56357	NA	10819	33163	NA	NA	NA	34177	NA	32597	0.0418132	NA	0.00802698	0.0246048	NA	NA	NA	0.0253571	NA	0.0241848	2	lld1;lld2_apk;300ob;300tzfg
102454	2856071	1000	2295837	2506908	14311	d__Bacteria	Verrucomicrobiota	c__Verrucomicrobiae	o__Verrucomicrobiales	f__Akkermansiaceae	g__Akkermansia	s__Akkermansia muciniphila	s__Akkermansia muciniphila	s__Akkermansia muciniphila:102454	74930	59802	59558	60703	61659	60001	60063	61328	54478	55639	0.0326373	0.026048	0.0259417	0.0264405	0.0268569	0.0261347	0.0261617	0.0267127	0.023729	0.0242347	6	dmp;lld1;lld2_apk;lld2_fsk;500fg_apk;500fg_fsk;300ob;ibd;300tzfg
102455	6769242	254	4060208	6152058	19666	d__Bacteria	Bacteroidota	c__Bacteroidia	o__Bacteroidales	f__Bacteroidaceae	g__Bacteroides	s__Bacteroides cellulosilyticus	s__Bacteroides cellulosilyticus	s__Bacteroides cellulosilyticus:102455	38675	25596	17954	23377	26383	17769	21518	28333	NA	25587	0.00952537	0.00630411	0.00442194	0.00575759	0.00649794	0.00437638	0.00529973	0.00697821	NA	0.00630189	6	dmp;lld1;lld2_apk;lld2_fsk;500fg_apk;500fg_fsk;300ob;300tzfg
102470	6052596	67	3650202	5496354	13541	d__Bacteria	Bacteroidota	c__Bacteroidia	o__Bacteroidales	f__Bacteroidaceae	g__Bacteroides	s__Bacteroides intestinalis	s__Bacteroides intestinalis	s__Bacteroides intestinalis:102470	34565	18118	NA	9582	16242	NA	27369	8242	NA	20903	0.00946934	0.00496356	NA	0.00262506	0.00444962	NA	0.00749794	0.00225796	NA	0.00572653	4	dmp;lld2_apk;lld2_fsk;500fg_fsk;300ob;300tzfg
102473	5473891	15	3565188	4944606	13366	d__Bacteria	Verrucomicrobiota	c__Lentisphaeria	o__UBA1784	f__	g__	s__	o__UBA1784	o__UBA1784:102473	97040	79731	NA	NA	72235	NA	71588	NA	NA	82498	0.0272188	0.0223638	NA	NA	0.0202612	NA	0.0200797	NA	NA	0.0231399	3	dmp;lld2_fsk;500fg_fsk;300tzfg
102480	2822848	71	1505483	2449869	15979	d__Bacteria	Actinobacteriota	c__Coriobacteriia	o__Coriobacteriales	f__Eggerthellaceae	g__Adlercreutzia	s__Adlercreutzia equolifaciens	s__Adlercreutzia equolifaciens	s__Adlercreutzia equolifaciens:102480	83319	66856	72384	71641	64895	71197	66953	70137	67209	28524	0.0553437	0.0444083	0.0480803	0.0475867	0.0431058	0.0472918	0.0444728	0.0465877	0.0446428	0.0189467	6	dmp;lld1;lld2_apk;lld2_fsk;500fg_apk;500fg_fsk;300ob;ibd;300tzfg
102492	3759317	1000	1798070	3259323	14703	d__Bacteria	Firmicutes_A	c__Clostridia	o__Lachnospirales	f__Lachnospiraceae	g__Agathobacter	s__Agathobacter rectalis	s__Agathobacter rectalis	s__Agathobacter rectalis:102492	4356	2594	2632	2610	2556	2784	2625	2575	2607	3213	0.0024226	0.00144266	0.00146379	0.00145156	0.00142152	0.00154833	0.0014599	0.00143209	0.00144989	0.00178692	6	dmp;lld1;lld2_apk;lld2_fsk;500fg_apk;500fg_fsk;300ob;ibd;300tzfg
102499	4872341	28	3367349	4340031	15808	d__Bacteria	Proteobacteria	c__Gammaproteobacteria	o__Enterobacterales	f__Enterobacteriaceae	g__Enterobacter	s__Enterobacter nimipressuralis	s__Enterobacter nimipressuralis	s__Enterobacter nimipressuralis:102499	5079	NA	NA	NA	NA	NA	NA	NA	NA	5079	0.00150831	NA	NA	NA	NA	NA	NA	NA	NA	0.00150831	0	300tzfg
102506	5890521	1000	3656001	4994196	28817	d__Bacteria	Proteobacteria	c__Gammaproteobacteria	o__Enterobacterales	f__Enterobacteriaceae	g__Escherichia	s__	g__Escherichia	g__Escherichia:102506	77634	64019	57585	36189	55218	34518	66088	64598	65186	54614	0.0212347	0.0175107	0.0157508	0.00989852	0.0151034	0.00944146	0.0180766	0.017669	0.0178299	0.0149382	6	dmp;lld1;lld2_apk;lld2_fsk;500fg_apk;500fg_fsk;300ob;ibd;300tzfg
102509	2501895	99	1398156	2127849	14840	d__Bacteria	Actinobacteriota	c__Coriobacteriia	o__Coriobacteriales	f__Eggerthellaceae	g__Slackia_A	s__	g__Slackia_A	g__Slackia_A:102509	92788	44008	54872	57181	48340	38606	48051	56744	16854	51746	0.0663646	0.0314757	0.039246	0.0408974	0.0345741	0.0276121	0.0343674	0.0405849	0.0120544	0.0370102	6	dmp;lld1;lld2_apk;lld2_fsk;500fg_apk;500fg_fsk;300ob;ibd;300tzfg
102511	5494686	65	4716729	4853763	18191	d__Bacteria	Proteobacteria	c__Gammaproteobacteria	o__Enterobacterales	f__Enterobacteriaceae	g__Klebsiella	s__Klebsiella variicola	s__Klebsiella variicola	s__Klebsiella variicola:102511	20318	NA	NA	NA	NA	NA	NA	NA	NA	20318	0.00430765	NA	NA	NA	NA	NA	NA	NA	NA	0.00430765	0	300tzfg
102517	3186374	423	2183091	2846457	19643	d__Bacteria	Firmicutes_A	c__Clostridia	o__Lachnospirales	f__Lachnospiraceae	g__Roseburia	s__Roseburia hominis	s__Roseburia hominis	s__Roseburia hominis:102517	29510	23256	23654	23601	23379	23509	23365	23361	21916	23174	0.0135175	0.0106528	0.0108351	0.0108108	0.0107091	0.0107687	0.0107027	0.0107009	0.010039	0.0106152	6	dmp;lld1;lld2_apk;lld2_fsk;500fg_apk;500fg_fsk;300ob;ibd;300tzfg
102528	3562647	1000	1776572	3139005	8975	d__Bacteria	Firmicutes_A	c__Clostridia	o__Lachnospirales	f__Lachnospiraceae	g__Anaerostipes	s__Anaerostipes hadrus	s__Anaerostipes hadrus	s__Anaerostipes hadrus:102528	4730	NA	2959	2950	1786	3034	2928	2939	2993	3631	0.00266243	NA	0.00166557	0.0016605	0.00100531	0.00170778	0.00164812	0.00165431	0.00168471	0.00204382	5	lld1;lld2_apk;lld2_fsk;500fg_apk;500fg_fsk;300ob;ibd;300tzfg
102530	2891718	1000	1848479	2505165	16302	d__Bacteria	Firmicutes_A	c__Clostridia	o__Oscillospirales	f__Ruminococcaceae	g__Ruminiclostridium_E	s__Ruminiclostridium_E siraeum	s__Ruminiclostridium_E siraeum	s__Ruminiclostridium_E siraeum:102530	36856	25589	24739	26225	25947	23973	24738	25405	12724	25308	0.0199386	0.0138433	0.0133834	0.0141873	0.0140369	0.012969	0.0133829	0.0137437	0.0068835	0.0136913	6	dmp;lld1;lld2_apk;lld2_fsk;500fg_apk;500fg_fsk;300ob;ibd;300tzfg
102538	6022216	677	4352225	5260587	14112	d__Bacteria	Proteobacteria	c__Gammaproteobacteria	o__Enterobacterales	f__Enterobacteriaceae	g__Klebsiella	s__Klebsiella pneumoniae	s__Klebsiella pneumoniae	s__Klebsiella pneumoniae:102538	12681	NA	NA	NA	NA	NA	NA	NA	NA	12681	0.00291368	NA	NA	NA	NA	NA	NA	NA	NA	0.00291368	0	300tzfg
102540	4639001	563	2530093	4150221	16159	d__Bacteria	Bacteroidota	c__Bacteroidia	o__Bacteroidales	f__Bacteroidaceae	g__Paraprevotella	s__Paraprevotella clara	s__Paraprevotella clara	s__Paraprevotella clara:102540	29362	25637	21149	25574	26233	26301	26148	24502	2620	9207	0.0116051	0.0101328	0.00835898	0.0101079	0.0103684	0.0103953	0.0103348	0.00968423	0.00103554	0.003639	6	dmp;lld1;lld2_apk;lld2_fsk;500fg_apk;500fg_fsk;300ob;ibd;300tzfg
102544	3738151	123	2315298	3277842	9685	d__Bacteria	Actinobacteriota	c__Coriobacteriia	o__Coriobacteriales	f__Eggerthellaceae	g__Eggerthella	s__Eggerthella lenta	s__Eggerthella lenta	s__Eggerthella lenta:102544	39128	NA	32496	26263	NA	12013	2281	14621	36005	16874	0.0168998	NA	0.0140353	0.0113432	NA	0.00518853	0.000985186	0.00631495	0.0155509	0.00728805	4	lld1;lld2_apk;500fg_apk;500fg_fsk;300ob;ibd;300tzfg
102545	3794376	1000	1505956	3137781	9350	d__Bacteria	Firmicutes_A	c__Clostridia	o__Oscillospirales	f__Ruminococcaceae	g__Faecalibacterium	s__Faecalibacterium prausnitzii_B	s__Faecalibacterium prausnitzii_B	s__Faecalibacterium prausnitzii_B:102545	2538	1756	1699	1685	1718	1737	1819	1669	1767	1890	0.00168531	0.00116604	0.00112819	0.00111889	0.0011408	0.00115342	0.00120787	0.00110827	0.00117334	0.00125502	6	dmp;lld1;lld2_apk;lld2_fsk;500fg_apk;500fg_fsk;300ob;ibd;300tzfg
102549	5640132	256	3476160	5048472	7991	d__Bacteria	Bacteroidota	c__Bacteroidia	o__Bacteroidales	f__Bacteroidaceae	g__Bacteroides	s__Bacteroides caccae	s__Bacteroides caccae	s__Bacteroides caccae:102549	2625	2216	2206	2215	2192	2259	2271	2158	2059	2094	0.000755144	0.000637485	0.000634608	0.000637197	0.000630581	0.000649855	0.000653307	0.0006208	0.00059232	0.000602389	6	dmp;lld1;lld2_apk;lld2_fsk;500fg_apk;500fg_fsk;300ob;ibd;300tzfg
102552	3004049	144	2218313	2537784	10547	d__Bacteria	Firmicutes_A	c__Clostridia	o__Lachnospirales	f__Lachnospiraceae	g__Lachnospira	s__GCA_000436535.1	s__GCA_000436535.1	s__GCA_000436535.1:102552	11922	NA	NA	NA	NA	NA	NA	NA	NA	11922	0.00537435	NA	NA	NA	NA	NA	NA	NA	NA	0.00537435	0	300tzfg
102556	2843644	166	1856415	2548998	14495	d__Bacteria	Bacteroidota	c__Bacteroidia	o__Bacteroidales	f__Muribaculaceae	g__CAG-279	s__CAG-279 sp1	s__CAG-279 sp1	s__CAG-279 sp1:102556	62037	29023	NA	34350	38070	3257	32969	33431	NA	42055	0.0334176	0.0156339	NA	0.0185034	0.0205073	0.00175446	0.0177595	0.0180084	NA	0.0226539	5	dmp;lld2_apk;lld2_fsk;500fg_apk;500fg_fsk;300ob;300tzfg
102563	3016350	42	1602999	2491176	6417	d__Bacteria	Firmicutes_A	c__Clostridia	o__Peptostreptococcales	f__Peptostreptococcaceae	g__Romboutsia	s__Romboutsia timonensis	s__Romboutsia timonensis	s__Romboutsia timonensis:102563	23790	NA	20355	19932	NA	19607	NA	19407	20145	14427	0.0148409	NA	0.0126981	0.0124342	NA	0.0122314	NA	0.0121067	0.0125671	0.00900001	3	lld1;lld2_apk;500fg_apk;300ob;ibd;300tzfg
102570	2290832	1000	1515048	1951437	13833	d__Bacteria	Firmicutes_A	c__Clostridia	o__Oscillospirales	f__DTU089	g__Ruminococcus_E	s__Ruminococcus_E sp1	s__Ruminococcus_E sp1	s__Ruminococcus_E sp1:102570	8901	4563	5234	5701	5442	5653	5304	5279	NA	4880	0.00587506	0.00301179	0.00345468	0.00376292	0.00359197	0.00373123	0.00350088	0.00348438	NA	0.00322102	6	dmp;lld1;lld2_apk;lld2_fsk;500fg_apk;500fg_fsk;300ob;300tzfg
102580	3138971	302	2050332	2713212	14422	d__Bacteria	Firmicutes_A	c__Clostridia	o__Lachnospirales	f__Lachnospiraceae	g__Lachnospira	s__Lachnospira sp1	s__Lachnospira sp1	s__Lachnospira sp1:102580	21411	NA	NA	NA	NA	NA	NA	7977	NA	18054	0.0104427	NA	NA	NA	NA	NA	NA	0.00389059	NA	0.0088054	0	300ob;300tzfg
102589	2786078	56	1501178	2444904	9939	d__Bacteria	Firmicutes_A	c__Clostridia	o__Oscillospirales	f__Oscillospiraceae	g__CAG-110	s__	g__CAG-110	g__CAG-110:102589	62847	1275	NA	NA	1388	NA	1146	NA	NA	62661	0.0418651	0.000849333	NA	NA	0.000924607	NA	0.0007634	NA	NA	0.0417412	3	dmp;lld2_fsk;500fg_fsk;300tzfg
102609	3323522	165	2215112	2907960	22473	d__Bacteria	Firmicutes_A	c__Clostridia	o__Lachnospirales	f__Lachnospiraceae	g__CAG-882	s__	g__CAG-882	g__CAG-882:102609	38451	6596	NA	NA	10365	NA	NA	NA	NA	34361	0.0173585	0.00297773	NA	NA	0.00467922	NA	NA	NA	NA	0.0155121	2	dmp;lld2_fsk;300tzfg
102612	2048542	26	1448622	1763991	6941	d__Bacteria	Firmicutes_A	c__Clostridia	o__Oscillospirales	f__Oscillospiraceae	g__CAG-83	s__	g__CAG-83	g__CAG-83:102612	47053	30719	1637	12861	33430	NA	28453	21038	NA	34660	0.0324812	0.0212057	0.00113004	0.00887809	0.0230771	NA	0.0196414	0.0145228	NA	0.0239262	5	dmp;lld1;lld2_apk;lld2_fsk;500fg_fsk;300ob;300tzfg
102616	1919079	264	1527638	1710312	6851	d__Bacteria	Proteobacteria	c__Alphaproteobacteria	o__RF32	f__CAG-239	g__CAG-495	s__GCA_001917125.1	s__GCA_001917125.1	s__GCA_001917125.1:102616	22770	19097	NA	NA	19726	NA	18605	NA	NA	NA	0.0149054	0.012501	NA	NA	0.0129127	NA	0.0121789	NA	NA	NA	3	dmp;lld2_fsk;500fg_fsk
102617	2179707	10	1501395	1892100	3865	d__Bacteria	Firmicutes_A	c__Clostridia	o__Oscillospirales	f__Oscillospiraceae	g__Oscillibacter	s__	g__Oscillibacter	g__Oscillibacter:102617	22287	19912	NA	1640	19661	NA	19935	NA	NA	16793	0.0148442	0.0132623	NA	0.00109232	0.0130952	NA	0.0132777	NA	NA	0.0111849	4	dmp;lld2_apk;lld2_fsk;500fg_fsk;300tzfg
102633	2721789	29	1984934	2335899	6991	d__Bacteria	Firmicutes_A	c__Clostridia	o__Lachnospirales	f__Lachnospiraceae	g__TF01-11	s__GCA_000435575.1	s__GCA_000435575.1	s__GCA_000435575.1:102633	1398	NA	NA	NA	NA	NA	NA	1398	NA	NA	0.000704306	NA	NA	NA	NA	NA	NA	0.000704306	NA	NA	0	300ob
102681	1897264	12	1316513	1685823	1937	d__Bacteria	Firmicutes_A	c__Clostridia	o__Christensenellales	f__	g__	s__	o__Christensenellales	o__Christensenellales:102681	53089	16688	46870	47989	14280	1657	42290	42267	20577	NA	0.0403255	0.0126759	0.0356016	0.0364516	0.0108468	0.00125863	0.0321227	0.0321053	0.0156299	NA	6	dmp;lld1;lld2_apk;lld2_fsk;500fg_apk;500fg_fsk;300ob;ibd
102710	2758433	12	1660274	2352282	10567	d__Bacteria	Firmicutes_A	c__Clostridia	o__Oscillospirales	f__Oscillospiraceae	g__CAG-170	s__	g__CAG-170	g__CAG-170:102710	109493	96035	60978	89019	97841	56972	96247	61627	NA	91933	0.0659488	0.0578429	0.0367277	0.0536171	0.0589306	0.0343148	0.0579706	0.0371186	NA	0.0553722	6	dmp;lld1;lld2_apk;lld2_fsk;500fg_apk;500fg_fsk;300ob;300tzfg
102711	3626394	16	2369971	3233340	5707	d__Bacteria	Firmicutes_A	c__Clostridia	o__Oscillospirales	f__DTU089	g__	s__	f__DTU089	f__DTU089:102711	33846	32630	NA	NA	32275	NA	32313	NA	NA	1887	0.0142812	0.0137681	NA	NA	0.0136183	NA	0.0136343	NA	NA	0.000796212	3	dmp;lld2_fsk;500fg_fsk;300tzfg
102715	2074051	203	1279094	1833438	13552	d__Bacteria	Firmicutes_A	c__Clostridia	o__Oscillospirales	f__Oscillospiraceae	g__ER4	s__GCA_000433195.1	s__GCA_000433195.1	s__GCA_000433195.1:102715	18083	15614	14343	14213	15321	14005	15627	14310	1190	13840	0.0141374	0.0122071	0.0112134	0.0111118	0.011978	0.0109492	0.0122172	0.0111876	0.000930346	0.0108202	6	dmp;lld1;lld2_apk;lld2_fsk;500fg_apk;500fg_fsk;300ob;ibd;300tzfg
102720	2351238	113	1457142	2067294	14519	d__Bacteria	Firmicutes_A	c__Clostridia	o__Oscillospirales	f__Oscillospiraceae	g__CAG-83	s__GCA_000435555.1	s__GCA_000435555.1	s__GCA_000435555.1:102720	29306	22771	22329	22142	22666	22682	23369	21527	NA	20754	0.020112	0.0156272	0.0153238	0.0151955	0.0155551	0.0155661	0.0160376	0.0147734	NA	0.0142429	6	dmp;lld1;lld2_apk;lld2_fsk;500fg_apk;500fg_fsk;300ob;300tzfg
102779	3160876	13	2958375	2739582	190	d__Bacteria	Firmicutes	c__Bacilli	o__Erysipelotrichales	f__Erysipelotrichaceae	g__Holdemania	s__GCF_900120005.1	s__GCF_900120005.1	s__GCF_900120005.1:102779	11910	1488	NA	NA	2828	NA	11716	NA	NA	NA	0.00402586	0.000502979	NA	NA	0.00095593	NA	0.00396028	NA	NA	NA	3	dmp;lld2_fsk;500fg_fsk
102781	2087156	11	1616246	1830279	611	d__Bacteria	Firmicutes_A	c__Clostridia	o__4C28d-15	f__CAG-727	g__	s__	f__CAG-727	f__CAG-727:102781	13996	13515	NA	NA	12718	NA	NA	NA	NA	NA	0.00865957	0.00836197	NA	NA	0.00786885	NA	NA	NA	NA	NA	2	dmp;lld2_fsk
102794	2416543	13	1430617	2098530	5817	d__Bacteria	Firmicutes_A	c__Clostridia	o__Oscillospirales	f__Oscillospiraceae	g__CAG-83	s__	g__CAG-83	g__CAG-83:102794	36932	27358	3045	22402	27733	NA	27965	11651	NA	25437	0.0258154	0.0191232	0.00212845	0.015659	0.0193853	NA	0.0195475	0.00814404	NA	0.0177804	5	dmp;lld1;lld2_apk;lld2_fsk;500fg_fsk;300ob;300tzfg
102831	1571466	246	1254506	1420674	7921	d__Bacteria	Firmicutes_A	c__Clostridia	o__4C28d-15	f__CAG-917	g__CAG-349	s__CAG-349 sp1	s__CAG-349 sp1	s__CAG-349 sp1:102831	55518	38828	NA	NA	39012	NA	10268	NA	NA	31696	0.0442549	0.0309508	NA	NA	0.0310975	NA	0.0081849	NA	NA	0.0252657	3	dmp;lld2_fsk;500fg_fsk;300tzfg
102876	2154239	70	1647062	1909809	3285	d__Bacteria	Firmicutes_A	c__Clostridia	o__Peptostreptococcales	f__Anaerovoracaceae	g__CAG-145	s__GCA_000435715.1	s__GCA_000435715.1	s__GCA_000435715.1:102876	5220	NA	NA	5220	NA	NA	NA	NA	NA	NA	0.00316928	NA	NA	0.00316928	NA	NA	NA	NA	NA	NA	1	lld2_apk
102882	2163775	28	1433604	1898430	5019	d__Bacteria	Firmicutes_A	c__Clostridia	o__Oscillospirales	f__Oscillospiraceae	g__CAG-83	s__CAG-83 sp1	s__CAG-83 sp1	s__CAG-83 sp1:102882	10877	7299	3327	5937	7672	1482	7060	7679	NA	6097	0.00758717	0.00509136	0.00232072	0.00414131	0.00535155	0.00103376	0.00492465	0.00535643	NA	0.00425292	6	dmp;lld1;lld2_apk;lld2_fsk;500fg_apk;500fg_fsk;300ob;300tzfg
102926	2260683	120	1530810	1961925	14007	d__Bacteria	Firmicutes_A	c__Clostridia	o__Oscillospirales	f__Oscillospiraceae	g__CAG-83	s__GCA_000431575.1	s__GCA_000431575.1	s__GCA_000431575.1:102926	31232	22670	20641	21665	22930	18877	21589	21855	20473	16594	0.0204023	0.0148092	0.0134837	0.0141526	0.014979	0.0123314	0.014103	0.0142768	0.013374	0.01084	6	dmp;lld1;lld2_apk;lld2_fsk;500fg_apk;500fg_fsk;300ob;ibd;300tzfg
102930	2680968	95	1625413	2265759	15243	d__Bacteria	Bacteroidota	c__Bacteroidia	o__Bacteroidales	f__Bacteroidaceae	g__Prevotellamassilia	s__	g__Prevotellamassilia	g__Prevotellamassilia:102930	33785	NA	NA	NA	NA	NA	NA	NA	NA	33785	0.0207855	NA	NA	NA	NA	NA	NA	NA	NA	0.0207855	0	300tzfg
102993	3505331	179	1781772	3088746	21568	d__Bacteria	Firmicutes_A	c__Clostridia	o__Oscillospirales	f__Oscillospiraceae	g__CAG-170	s__GCA_000432135.1	s__GCA_000432135.1	s__GCA_000432135.1:102993	28660	20378	19973	20474	20614	18418	19592	21095	NA	21710	0.0160851	0.0114369	0.0112096	0.0114908	0.0115694	0.0103369	0.0109958	0.0118393	NA	0.0121845	6	dmp;lld1;lld2_apk;lld2_fsk;500fg_apk;500fg_fsk;300ob;300tzfg
103017	2459655	214	1666898	2182347	12851	d__Bacteria	Proteobacteria	c__Gammaproteobacteria	o__Betaproteobacteriales	f__Burkholderiaceae	g__	s__	f__Burkholderiaceae	f__Burkholderiaceae:103017	18288	18062	NA	NA	1161	NA	NA	NA	NA	NA	0.0109713	0.0108357	NA	NA	0.000696503	NA	NA	NA	NA	NA	2	dmp;lld2_fsk
103022	2558481	408	1550796	2211207	4508	d__Bacteria	Proteobacteria	c__Gammaproteobacteria	o__Betaproteobacteriales	f__Burkholderiaceae	g__Parasutterella	s__GCA_000980495.1	s__GCA_000980495.1	s__GCA_000980495.1:103022	2862	1831	NA	NA	NA	NA	2682	NA	NA	NA	0.0018455	0.00118068	NA	NA	NA	NA	0.00172943	NA	NA	NA	2	dmp;500fg_fsk
103166	2970003	36	1668570	2438646	14220	d__Bacteria	Firmicutes_A	c__Clostridia	o__Oscillospirales	f__Ruminococcaceae	g__Faecalibacterium	s__	g__Faecalibacterium	g__Faecalibacterium:103166	25721	19211	18641	18947	18932	19235	19255	18413	2092	18524	0.015415	0.0115135	0.0111718	0.0113552	0.0113462	0.0115278	0.0115398	0.0110352	0.00125377	0.0111017	6	dmp;lld1;lld2_apk;lld2_fsk;500fg_apk;500fg_fsk;300ob;ibd;300tzfg
103190	2052713	21	1534212	1793871	6047	d__Bacteria	Firmicutes_C	c__Negativicutes	o__Veillonellales	f__Veillonellaceae	g__Veillonella	s__Veillonella rogosae	s__Veillonella rogosae	s__Veillonella rogosae:103190	6818	NA	NA	NA	NA	NA	NA	NA	NA	6818	0.00444398	NA	NA	NA	NA	NA	NA	NA	NA	0.00444398	0	300tzfg
103217	2090966	32	1503196	1796868	5310	d__Bacteria	Proteobacteria	c__Alphaproteobacteria	o__RF32	f__CAG-239	g__CAG-267	s__GCA_001917135.1	s__GCA_001917135.1	s__GCA_001917135.1:103217	25927	24339	NA	NA	23517	NA	6017	NA	NA	NA	0.0172479	0.0161915	NA	NA	0.0156447	NA	0.0040028	NA	NA	NA	3	dmp;lld2_fsk;500fg_fsk
103237	4562618	15	3596317	4153338	6136	d__Bacteria	Verrucomicrobiota	c__Lentisphaeria	o__UBA1784	f__	g__	s__	o__UBA1784	o__UBA1784:103237	43824	41032	NA	NA	40875	NA	41824	NA	NA	3746	0.0121858	0.0114095	NA	NA	0.0113658	NA	0.0116297	NA	NA	0.00104162	3	dmp;lld2_fsk;500fg_fsk;300tzfg
103288	2215926	37	1346856	1938363	9698	d__Bacteria	Proteobacteria	c__Gammaproteobacteria	o__Betaproteobacteriales	f__Burkholderiaceae	g__	s__	f__Burkholderiaceae	f__Burkholderiaceae:103288	35654	NA	NA	NA	NA	NA	NA	NA	NA	35654	0.026472	NA	NA	NA	NA	NA	NA	NA	NA	0.026472	0	300tzfg
103298	1700815	29	1173574	1506294	4536	d__Bacteria	Actinobacteriota	c__Coriobacteriia	o__Coriobacteriales	f__Atopobiaceae	g__Libanicoccus	s__	g__Libanicoccus	g__Libanicoccus:103298	2789	NA	NA	NA	NA	NA	NA	2789	NA	NA	0.0023765	NA	NA	NA	NA	NA	NA	0.0023765	NA	NA	0	300ob
103306	2342396	46	1832819	2017806	9579	d__Bacteria	Firmicutes_A	c__Clostridia	o__Oscillospirales	f__CAG-272	g__CAG-448	s__	g__CAG-448	g__CAG-448:103306	65151	45347	NA	NA	48091	NA	48864	NA	NA	45770	0.0355469	0.0247417	NA	NA	0.0262388	NA	0.0266606	NA	NA	0.0249725	3	dmp;lld2_fsk;500fg_fsk;300tzfg
103310	2352416	11	1425671	2032614	1730	d__Bacteria	Firmicutes_A	c__Clostridia	o__4C28d-15	f__CAG-727	g__UBA10281	s__	g__UBA10281	g__UBA10281:103310	2813	NA	NA	NA	NA	NA	NA	NA	NA	2813	0.00197311	NA	NA	NA	NA	NA	NA	NA	NA	0.00197311	0	300tzfg
103318	2351876	167	1487096	1990983	8529	d__Bacteria	Proteobacteria	c__Gammaproteobacteria	o__Betaproteobacteriales	f__Burkholderiaceae	g__	s__	f__Burkholderiaceae	f__Burkholderiaceae:103318	25422	18515	NA	NA	17692	NA	18238	NA	NA	15310	0.0170951	0.0124504	NA	NA	0.011897	NA	0.0122642	NA	NA	0.0102952	3	dmp;lld2_fsk;500fg_fsk;300tzfg
103335	3295822	13	2084697	2862000	4466	d__Bacteria	Firmicutes_A	c__Clostridia	o__Lachnospirales	f__Lachnospiraceae	g__GCA-900066135	s__	g__GCA-900066135	g__GCA-900066135:103335	42369	21444	28067	29799	21442	28666	27699	28415	28262	35286	0.0203238	0.0102864	0.0134633	0.0142942	0.0102854	0.0137507	0.0132868	0.0136303	0.0135569	0.0169262	6	dmp;lld1;lld2_apk;lld2_fsk;500fg_apk;500fg_fsk;300ob;ibd;300tzfg
103409	2827775	35	1493979	2349243	13649	d__Bacteria	Firmicutes_A	c__Clostridia	o__Oscillospirales	f__Oscillospiraceae	g__CAG-110	s__	g__CAG-110	g__CAG-110:103409	69953	1293	NA	NA	1499	NA	1145	NA	NA	69713	0.0468233	0.000865474	NA	NA	0.00100336	NA	0.00076641	NA	NA	0.0466626	3	dmp;lld2_fsk;500fg_fsk;300tzfg
103411	5994450	261	1133979	5042676	7065	d__Bacteria	Firmicutes	c__Bacilli	o__RFN20	f__CAG-288	g__CAG-568	s__GCA_000434395.1	s__GCA_000434395.1	s__GCA_000434395.1:103411	15844	NA	NA	NA	NA	NA	NA	NA	NA	15844	0.013972	NA	NA	NA	NA	NA	NA	NA	NA	0.013972	0	300tzfg
103439	2600500	1000	1768396	2256678	7005	d__Bacteria	Firmicutes_C	c__Negativicutes	o__Acidaminococcales	f__Acidaminococcaceae	g__CAG-207	s__GCA_000436295.1	s__GCA_000436295.1	s__GCA_000436295.1:103439	16860	10946	9347	9968	11269	11564	11926	6323	NA	8433	0.00953406	0.00618979	0.00528558	0.00563675	0.00637244	0.00653926	0.00674396	0.00357556	NA	0.00476873	6	dmp;lld1;lld2_apk;lld2_fsk;500fg_apk;500fg_fsk;300ob;300tzfg
103449	2477274	24	1972405	2241690	5734	d__Bacteria	Verrucomicrobiota	c__Verrucomicrobiae	o__Opitutales	f__CAG-312	g__CAG-312	s__	g__CAG-312	g__CAG-312:103449	13679	NA	NA	NA	NA	NA	NA	NA	NA	13679	0.00693519	NA	NA	NA	NA	NA	NA	NA	NA	0.00693519	0	300tzfg
103456	2381925	21	1617065	2055852	6487	d__Bacteria	Firmicutes_A	c__Clostridia	o__Oscillospirales	f__CAG-272	g__CAG-448	s__	g__CAG-448	g__CAG-448:103456	46061	29280	NA	NA	33322	NA	1757	NA	NA	33157	0.0284843	0.0181069	NA	NA	0.0206065	NA	0.00108654	NA	NA	0.0205044	3	dmp;lld2_fsk;500fg_fsk;300tzfg
103465	1993474	32	1578878	1755954	6612	d__Bacteria	Firmicutes_A	c__Clostridia	o__Oscillospirales	f__CAG-272	g__CAG-724	s__	g__CAG-724	g__CAG-724:103465	2077	NA	NA	NA	NA	NA	NA	NA	NA	2077	0.00131549	NA	NA	NA	NA	NA	NA	NA	NA	0.00131549	0	300tzfg
103486	2849476	32	2175987	2606370	4145	d__Bacteria	Firmicutes_A	c__Clostridia	o__Lachnospirales	f__Lachnospiraceae	g__CAG-95	s__GCA_000436115.1	s__GCA_000436115.1	s__GCA_000436115.1:103486	21922	NA	NA	NA	NA	NA	NA	NA	NA	21922	0.0100745	NA	NA	NA	NA	NA	NA	NA	NA	0.0100745	0	300tzfg
103504	2246614	15	1553674	1860231	5080	d__Bacteria	Firmicutes_A	c__Clostridia	o__4C28d-15	f__CAG-314	g__CAG-1435	s__	g__CAG-1435	g__CAG-1435:103504	16501	NA	NA	NA	NA	NA	NA	NA	NA	16501	0.0106206	NA	NA	NA	NA	NA	NA	NA	NA	0.0106206	0	300tzfg
103508	2333114	17	1336656	1908279	3802	d__Bacteria	Firmicutes_A	c__Clostridia	o__4C28d-15	f__CAG-727	g__	s__	f__CAG-727	f__CAG-727:103508	26488	NA	NA	NA	NA	NA	NA	NA	NA	26488	0.0198166	NA	NA	NA	NA	NA	NA	NA	NA	0.0198166	0	300tzfg
103656	2761965	354	1729307	2386068	10352	d__Bacteria	Firmicutes_A	c__Clostridia	o__Oscillospirales	f__DTU089	g__	s__	f__DTU089	f__DTU089:103656	50186	30890	30816	31947	32295	28527	29030	33617	32960	26116	0.0290209	0.0178626	0.0178199	0.0184739	0.0186751	0.0164962	0.0167871	0.0194396	0.0190597	0.015102	6	dmp;lld1;lld2_apk;lld2_fsk;500fg_apk;500fg_fsk;300ob;ibd;300tzfg
103681	4271349	459	2340386	3825624	11632	d__Bacteria	Bacteroidota	c__Bacteroidia	o__Bacteroidales	f__Bacteroidaceae	g__Bacteroides	s__Bacteroides stercoris	s__Bacteroides stercoris	s__Bacteroides stercoris:103681	9904	8536	7184	8184	8460	8138	8563	8360	7091	4429	0.00423178	0.00364726	0.00306958	0.00349686	0.00361479	0.0034772	0.0036588	0.00357206	0.00302984	0.00189242	6	dmp;lld1;lld2_apk;lld2_fsk;500fg_apk;500fg_fsk;300ob;ibd;300tzfg
103682	4346557	282	2242164	3764796	6297	d__Bacteria	Firmicutes_A	c__Clostridia	o__Oscillospirales	f__Ruminococcaceae	g__Ruthenibacterium	s__Ruthenibacterium lactatiformans	s__Ruthenibacterium lactatiformans	s__Ruthenibacterium lactatiformans:103682	22005	17036	16152	16328	16982	9998	17311	14721	15344	8334	0.00981418	0.00759802	0.00720375	0.00728225	0.00757393	0.00445909	0.00772067	0.00656553	0.00684339	0.00371694	6	dmp;lld1;lld2_apk;lld2_fsk;500fg_apk;500fg_fsk;300ob;ibd;300tzfg
103683	2339457	434	1537833	2048244	9525	d__Bacteria	Actinobacteriota	c__Actinobacteria	o__Actinomycetales	f__Bifidobacteriaceae	g__Bifidobacterium	s__Bifidobacterium pseudocatenulatum	s__Bifidobacterium pseudocatenulatum	s__Bifidobacterium pseudocatenulatum:103683	4083	NA	1951	NA	NA	2433	NA	NA	1911	3027	0.00265503	NA	0.00126867	NA	NA	0.0015821	NA	NA	0.00124266	0.00196835	2	lld1;500fg_apk;ibd;300tzfg
103686	3368907	1000	1481129	2868321	16185	d__Bacteria	Firmicutes_A	c__Clostridia	o__Oscillospirales	f__Oscillospiraceae	g__ER4	s__ER4 sp1	s__ER4 sp1	s__ER4 sp1:103686	7385	6104	5766	5780	6051	5669	6259	5646	5666	5360	0.00498606	0.00412118	0.00389298	0.00390243	0.0040854	0.00382749	0.00422583	0.00381196	0.00382546	0.00361886	6	dmp;lld1;lld2_apk;lld2_fsk;500fg_apk;500fg_fsk;300ob;ibd;300tzfg
103694	3398401	1000	2067771	3040437	12675	d__Bacteria	Firmicutes_A	c__Clostridia	o__Lachnospirales	f__Lachnospiraceae	g__Agathobacter	s__Agathobacter faecis	s__Agathobacter faecis	s__Agathobacter faecis:103694	2038	1441	1479	1474	1472	1509	1483	1458	1452	1329	0.000985602	0.000696886	0.000715263	0.000712845	0.000711878	0.000729771	0.000717197	0.000705107	0.000702205	0.000642721	6	dmp;lld1;lld2_apk;lld2_fsk;500fg_apk;500fg_fsk;300ob;ibd;300tzfg
103695	3492132	90	1958332	3023736	13869	d__Bacteria	Firmicutes_A	c__Clostridia	o__Lachnospirales	f__Lachnospiraceae	g__Ruminococcus_A	s__GCA_900066745.1	s__GCA_900066745.1	s__GCA_900066745.1:103695	23997	8536	13548	14032	9003	13952	13060	14378	13424	17240	0.0122538	0.00435881	0.00691813	0.00716528	0.00459728	0.00712443	0.00666894	0.00734196	0.00685481	0.00880341	6	dmp;lld1;lld2_apk;lld2_fsk;500fg_apk;500fg_fsk;300ob;ibd;300tzfg
103697	3900702	100	1834099	3421422	20656	d__Bacteria	Bacteroidota	c__Bacteroidia	o__Bacteroidales	f__Bacteroidaceae	g__Prevotella	s__Prevotella copri_A	s__Prevotella copri_A	s__Prevotella copri_A:103697	50639	NA	NA	NA	NA	NA	1202	19838	NA	45327	0.0276097	NA	NA	NA	NA	NA	0.000655363	0.0108162	NA	0.0247135	1	500fg_fsk;300ob;300tzfg
103702	3795992	505	1885722	3320250	15864	d__Bacteria	Firmicutes_A	c__Clostridia	o__Lachnospirales	f__Lachnospiraceae	g__CAG-24	s__CAG-24 sp1	s__CAG-24 sp1	s__CAG-24 sp1:103702	24214	14292	14507	14688	14925	15843	15549	14667	15152	13718	0.0128407	0.00757906	0.00769307	0.00778906	0.00791474	0.00840156	0.00824565	0.00777792	0.00803512	0.00727467	6	dmp;lld1;lld2_apk;lld2_fsk;500fg_apk;500fg_fsk;300ob;ibd;300tzfg
103875	3339296	52	2140377	2909112	16641	d__Bacteria	Firmicutes_A	c__Clostridia	o__Christensenellales	f__CAG-74	g__Firm-11	s__	g__Firm-11	g__Firm-11:103875	86835	74775	19378	39467	66107	NA	69100	18798	NA	NA	0.04057	0.0349354	0.00905355	0.0184393	0.0308857	NA	0.032284	0.00878256	NA	NA	5	dmp;lld1;lld2_apk;lld2_fsk;500fg_fsk;300ob
103891	3334600	1000	2376356	2868891	17672	d__Bacteria	Firmicutes_A	c__Clostridia	o__Christensenellales	f__CAG-74	g__UBA11524	s__UBA11524 sp1	s__UBA11524 sp1	s__UBA11524 sp1:103891	100753	71145	69890	70353	71620	71390	71818	69839	NA	55870	0.0423981	0.0299387	0.0294106	0.0296054	0.0301386	0.0300418	0.0302219	0.0293891	NA	0.0235108	6	dmp;lld1;lld2_apk;lld2_fsk;500fg_apk;500fg_fsk;300ob;300tzfg
103899	2608702	52	1660059	2231730	13864	d__Bacteria	Firmicutes_A	c__Clostridia	o__Oscillospirales	f__Ruminococcaceae	g__Faecalibacterium	s__	g__Faecalibacterium	g__Faecalibacterium:103899	6327	3928	3796	3848	3922	4018	4073	3910	3690	4810	0.00381131	0.00236618	0.00228667	0.00231799	0.00236257	0.0024204	0.00245353	0.00235534	0.00222281	0.00289749	6	dmp;lld1;lld2_apk;lld2_fsk;500fg_apk;500fg_fsk;300ob;ibd;300tzfg
103921	2666935	99	1595226	2345472	18096	d__Bacteria	Firmicutes_A	c__Clostridia	o__Oscillospirales	f__Ruminococcaceae	g__Subdoligranulum	s__	g__Subdoligranulum	g__Subdoligranulum:103921	38424	7189	9602	16505	12054	NA	5022	22659	NA	29976	0.0240869	0.00450657	0.00601921	0.0103465	0.0075563	NA	0.00314814	0.0142043	NA	0.0187911	5	dmp;lld1;lld2_apk;lld2_fsk;500fg_fsk;300ob;300tzfg
103937	3037146	1000	1783578	2539974	7892	d__Bacteria	Firmicutes_A	c__Clostridia	o__Oscillospirales	f__Ruminococcaceae	g__Subdoligranulum	s__	g__Subdoligranulum	g__Subdoligranulum:103937	8265	4826	4768	4699	4736	4952	4792	4625	4743	4013	0.00463394	0.0027058	0.00267328	0.00263459	0.00265534	0.00277644	0.00268673	0.0025931	0.00265926	0.00224997	6	dmp;lld1;lld2_apk;lld2_fsk;500fg_apk;500fg_fsk;300ob;ibd;300tzfg
103940	1171796	165	923038	1039134	6092	d__Bacteria	Firmicutes	c__Bacilli	o__RF39	f__UBA660	g__CAG-302	s__GCA_000431795.1	s__GCA_000431795.1	s__GCA_000431795.1:103940	2524	NA	NA	2131	NA	NA	NA	NA	NA	1207	0.00273445	NA	NA	0.00230868	NA	NA	NA	NA	NA	0.00130764	1	lld2_apk;300tzfg
103949	2818780	74	1889351	2562891	11355	d__Bacteria	Firmicutes_A	c__Clostridia	o__Lachnospirales	f__Lachnospiraceae	g__Eubacterium_F	s__	g__Eubacterium_F	g__Eubacterium_F:103949	53694	21337	31524	29598	18902	17546	37597	29686	NA	29625	0.0284193	0.0112933	0.0166851	0.0156657	0.0100045	0.00928679	0.0198994	0.0157123	NA	0.01568	6	dmp;lld1;lld2_apk;lld2_fsk;500fg_apk;500fg_fsk;300ob;300tzfg
103958	2530411	42	2130873	2200092	10052	d__Bacteria	Verrucomicrobiota	c__Verrucomicrobiae	o__Opitutales	f__CAG-312	g__CAG-312	s__	g__CAG-312	g__CAG-312:103958	29444	20071	NA	NA	26421	NA	NA	NA	NA	NA	0.0138178	0.00941914	NA	NA	0.0123991	NA	NA	NA	NA	NA	2	dmp;lld2_fsk
103961	2169437	15	1672209	1885605	4470	d__Bacteria	Firmicutes_A	c__Clostridia	o__Christensenellales	f__CAG-138	g__	s__	f__CAG-138	f__CAG-138:103961	14383	NA	NA	NA	NA	NA	NA	NA	NA	14383	0.0086012	NA	NA	NA	NA	NA	NA	NA	NA	0.0086012	0	300tzfg
103966	2045785	15	1629007	1763052	2865	d__Bacteria	Firmicutes_A	c__Clostridia	o__Oscillospirales	f__CAG-272	g__	s__	f__CAG-272	f__CAG-272:103966	25972	22696	NA	NA	20593	NA	1354	NA	NA	13551	0.0159435	0.0139324	NA	NA	0.0126414	NA	0.000831181	NA	NA	0.00831856	3	dmp;lld2_fsk;500fg_fsk;300tzfg
103967	2080835	23	1625293	1801038	10818	d__Bacteria	Firmicutes_A	c__Clostridia	o__4C28d-15	f__	g__	s__	o__4C28d-15	o__4C28d-15:103967	57404	8078	NA	NA	26470	NA	40658	NA	NA	33366	0.0353192	0.00497018	NA	NA	0.0162863	NA	0.0250158	NA	NA	0.0205292	3	dmp;lld2_fsk;500fg_fsk;300tzfg
103971	1912636	45	1202379	1688481	9234	d__Bacteria	Firmicutes_A	c__Clostridia	o__Peptostreptococcales	f__Anaerovoracaceae	g__Mogibacterium	s__	g__Mogibacterium	g__Mogibacterium:103971	65814	NA	NA	NA	NA	NA	NA	47715	NA	39676	0.0547365	NA	NA	NA	NA	NA	NA	0.0396838	NA	0.0329979	0	300ob;300tzfg
103973	2119878	37	1579424	1845762	9300	d__Bacteria	Firmicutes_A	c__Clostridia	o__Oscillospirales	f__CAG-272	g__	s__	f__CAG-272	f__CAG-272:103973	62094	44895	NA	36853	43706	NA	40390	6130	NA	46161	0.0393143	0.0284249	NA	0.0233332	0.0276721	NA	0.0255726	0.00388116	NA	0.0292265	4	dmp;lld2_apk;lld2_fsk;500fg_fsk;300ob;300tzfg
103990	2160620	197	1466106	1909773	13080	d__Bacteria	Firmicutes_A	c__Clostridia	o__Oscillospirales	f__DTU089	g__Ruminococcus_E	s__GCA_000437975.1	s__GCA_000437975.1	s__GCA_000437975.1:103990	46263	NA	NA	NA	NA	NA	NA	NA	NA	46263	0.031555	NA	NA	NA	NA	NA	NA	NA	NA	0.031555	0	300tzfg
104006	2684775	219	2008284	2455311	10636	d__Bacteria	Bacteroidota	c__Bacteroidia	o__Bacteroidales	f__Rikenellaceae	g__Alistipes	s__GCA_000434235.1	s__GCA_000434235.1	s__GCA_000434235.1:104006	1641	1641	NA	NA	NA	NA	NA	NA	NA	NA	0.000817116	0.000817116	NA	NA	NA	NA	NA	NA	NA	NA	1	dmp
104016	2152735	16	1402357	1917369	4020	d__Bacteria	Firmicutes_A	c__Clostridia	o__Peptostreptococcales	f__Anaerovoracaceae	g__UBA1191	s__	g__UBA1191	g__UBA1191:104016	41333	2092	29095	28836	4240	29629	22940	29103	27627	21934	0.0294739	0.00149177	0.0207472	0.0205625	0.00302348	0.021128	0.0163582	0.0207529	0.0197004	0.0156408	6	dmp;lld1;lld2_apk;lld2_fsk;500fg_apk;500fg_fsk;300ob;ibd;300tzfg
104041	2215619	49	1331787	1876800	18487	d__Bacteria	Actinobacteriota	c__Coriobacteriia	o__Coriobacteriales	f__Eggerthellaceae	g__	s__	f__Eggerthellaceae	f__Eggerthellaceae:104041	96455	53702	59860	59410	54951	47001	54622	61775	7656	43577	0.0724252	0.0403233	0.0449471	0.0446092	0.0412611	0.0352917	0.0410141	0.046385	0.00574867	0.0327207	6	dmp;lld1;lld2_apk;lld2_fsk;500fg_apk;500fg_fsk;300ob;ibd;300tzfg
104052	2656060	44	1983255	2372565	10721	d__Bacteria	Firmicutes_A	c__Clostridia	o__Christensenellales	f__CAG-74	g__	s__	f__CAG-74	f__CAG-74:104052	78163	52964	3504	46355	54080	NA	54947	28886	NA	55227	0.0394115	0.0267056	0.00176679	0.0233732	0.0272683	NA	0.0277055	0.0145649	NA	0.0278466	5	dmp;lld1;lld2_apk;lld2_fsk;500fg_fsk;300ob;300tzfg
104055	2501121	11	1874595	2217621	1992	d__Bacteria	Firmicutes_A	c__Clostridia	o__Lachnospirales	f__Lachnospiraceae	g__Eubacterium_G	s__	g__Eubacterium_G	g__Eubacterium_G:104055	1675	NA	NA	NA	NA	NA	NA	NA	NA	1675	0.000893526	NA	NA	NA	NA	NA	NA	NA	NA	0.000893526	0	300tzfg
104081	2523774	13	1698961	2117841	2759	d__Bacteria	Firmicutes_A	c__Clostridia	o__Oscillospirales	f__CAG-382	g__	s__	f__CAG-382	f__CAG-382:104081	34217	2871	NA	NA	34135	NA	NA	NA	NA	NA	0.02014	0.00168986	NA	NA	0.0200917	NA	NA	NA	NA	NA	2	dmp;lld2_fsk
104083	1739746	117	1296827	1557705	14741	d__Bacteria	Actinobacteriota	c__Coriobacteriia	o__Coriobacteriales	f__Eggerthellaceae	g__CAG-1427	s__GCA_000435675.1	s__GCA_000435675.1	s__GCA_000435675.1:104083	1841	NA	1434	1739	NA	NA	NA	NA	NA	NA	0.00141962	NA	0.00110578	0.00134097	NA	NA	NA	NA	NA	NA	2	lld1;lld2_apk
104088	3015595	26	2237822	2625057	20366	d__Bacteria	Firmicutes_A	c__Clostridia	o__Christensenellales	f__CAG-74	g__	s__	f__CAG-74	f__CAG-74:104088	117233	101329	14894	86706	99978	3652	101441	24957	NA	95179	0.0523871	0.0452802	0.00665558	0.0387457	0.0446765	0.00163194	0.0453302	0.0111524	NA	0.042532	6	dmp;lld1;lld2_apk;lld2_fsk;500fg_apk;500fg_fsk;300ob;300tzfg
104113	2590925	14	1722798	2318043	5570	d__Bacteria	Firmicutes_A	c__Clostridia	o__Oscillospirales	f__CAG-272	g__CAG-272	s__GCA_000433515.1	s__GCA_000433515.1	s__GCA_000433515.1:104113	40980	35429	NA	NA	34172	NA	19908	NA	NA	4723	0.0237869	0.0205648	NA	NA	0.0198352	NA	0.0115556	NA	NA	0.00274147	3	dmp;lld2_fsk;500fg_fsk;300tzfg
104114	3683300	114	1991463	3277929	16679	d__Bacteria	Firmicutes_A	c__Clostridia	o__Lachnospirales	f__Lachnospiraceae	g__CAG-95	s__GCA_000438155.1	s__GCA_000438155.1	s__GCA_000438155.1:104114	57060	35451	29938	33894	36129	15160	37406	29224	NA	43410	0.0286523	0.0178015	0.0150332	0.0170196	0.0181419	0.00761249	0.0187832	0.0146746	NA	0.021798	6	dmp;lld1;lld2_apk;lld2_fsk;500fg_apk;500fg_fsk;300ob;300tzfg
104117	1215629	262	862859	1091355	6612	d__Bacteria	Firmicutes	c__Bacilli	o__RF39	f__UBA660	g__CAG-302	s__CAG-302 sp3	s__CAG-302 sp3	s__CAG-302 sp3:104117	20649	12617	10621	14936	11100	9866	7562	12534	NA	2850	0.0239309	0.0146223	0.0123091	0.0173099	0.0128642	0.0114341	0.00876389	0.0145261	NA	0.00330297	6	dmp;lld1;lld2_apk;lld2_fsk;500fg_apk;500fg_fsk;300ob;300tzfg
104129	2343469	14	1735756	2019984	6574	d__Bacteria	Firmicutes_A	c__Clostridia	o__Oscillospirales	f__DTU089	g__Neglecta	s__GCA_000435395.1	s__GCA_000435395.1	s__GCA_000435395.1:104129	53555	32917	39888	41420	31205	NA	4353	41123	46884	NA	0.030854	0.0189641	0.0229802	0.0238628	0.0179778	NA	0.00250784	0.0236917	0.0270107	NA	5	dmp;lld1;lld2_apk;lld2_fsk;500fg_fsk;300ob;ibd
104137	2417189	15	1843588	2171442	7789	d__Bacteria	Firmicutes_A	c__Clostridia	o__Oscillospirales	f__Oscillospiraceae	g__	s__	f__Oscillospiraceae	f__Oscillospiraceae:104137	61164	47303	42370	44922	45863	19988	47376	43325	NA	44946	0.0331766	0.0256581	0.0229824	0.0243666	0.024877	0.0108419	0.0256977	0.0235004	NA	0.0243796	6	dmp;lld1;lld2_apk;lld2_fsk;500fg_apk;500fg_fsk;300ob;300tzfg
104138	1988445	31	1332406	1814145	5193	d__Bacteria	Actinobacteriota	c__Coriobacteriia	o__Coriobacteriales	f__	g__	s__	o__Coriobacteriales	o__Coriobacteriales:104138	39947	NA	13998	38627	NA	1446	NA	NA	NA	NA	0.0299811	NA	0.0105058	0.0289904	NA	0.00108525	NA	NA	NA	NA	3	lld1;lld2_apk;500fg_apk
104145	2140955	37	1732085	1917957	8879	d__Bacteria	Firmicutes_A	c__Clostridia	o__Oscillospirales	f__	g__	s__	o__Oscillospirales	o__Oscillospirales:104145	58968	40144	NA	NA	35219	NA	51966	NA	NA	NA	0.0340445	0.0231767	NA	NA	0.0203333	NA	0.030002	NA	NA	NA	3	dmp;lld2_fsk;500fg_fsk
104150	3434704	16	2673184	3045201	5191	d__Bacteria	Proteobacteria	c__Gammaproteobacteria	o__Betaproteobacteriales	f__Burkholderiaceae	g__Comamonas	s__Comamonas kerstersii	s__Comamonas kerstersii	s__Comamonas kerstersii:104150	1859	NA	NA	NA	NA	NA	NA	NA	NA	1859	0.000695425	NA	NA	NA	NA	NA	NA	NA	NA	0.000695425	0	300tzfg
104158	2161981	159	1387511	1739781	15735	d__Bacteria	Firmicutes_C	c__Negativicutes	o__Veillonellales	f__Dialisteraceae	g__Dialister	s__Dialister invisus	s__Dialister invisus	s__Dialister invisus:104158	40912	32520	31801	32811	32617	33189	32467	33360	32975	NA	0.0294859	0.0234377	0.0229195	0.0236474	0.0235076	0.0239198	0.0233995	0.0240431	0.0237656	NA	6	dmp;lld1;lld2_apk;lld2_fsk;500fg_apk;500fg_fsk;300ob;ibd
104163	2377635	10	1667151	2063139	5272	d__Bacteria	Firmicutes_A	c__Clostridia	o__Oscillospirales	f__Oscillospiraceae	g__Ruminiclostridium_C	s__	g__Ruminiclostridium_C	g__Ruminiclostridium_C:104163	51595	5107	46803	46200	4660	23467	4428	38819	41205	1868	0.030948	0.00306331	0.0280736	0.0277119	0.00279519	0.0140761	0.00265603	0.0232846	0.0247158	0.00112047	6	dmp;lld1;lld2_apk;lld2_fsk;500fg_apk;500fg_fsk;300ob;ibd;300tzfg
104165	1950565	58	1336042	1716408	13874	d__Bacteria	Firmicutes_A	c__Clostridia	o__Oscillospirales	f__Oscillospiraceae	g__ER4	s__	g__ER4	g__ER4:104165	39462	27548	15022	24165	28062	NA	28298	26133	NA	21461	0.0295365	0.0206191	0.0112437	0.018087	0.0210038	NA	0.0211805	0.01956	NA	0.0160631	5	dmp;lld1;lld2_apk;lld2_fsk;500fg_fsk;300ob;300tzfg
104196	2258291	38	1380254	1998348	12876	d__Bacteria	Firmicutes_A	c__Clostridia	o__Oscillospirales	f__Oscillospiraceae	g__CAG-83	s__CAG-83 sp2	s__CAG-83 sp2	s__CAG-83 sp2:104196	25148	19746	18689	18929	19745	17461	19922	20249	2429	18256	0.0182198	0.0143061	0.0135403	0.0137141	0.0143053	0.0126506	0.0144336	0.0146705	0.00175982	0.0132266	6	dmp;lld1;lld2_apk;lld2_fsk;500fg_apk;500fg_fsk;300ob;ibd;300tzfg
104207	2788762	30	1900636	2451855	5401	d__Bacteria	Bacteroidota	c__Bacteroidia	o__Bacteroidales	f__Bacteroidaceae	g__	s__	f__Bacteroidaceae	f__Bacteroidaceae:104207	14566	NA	NA	NA	NA	NA	NA	NA	NA	14566	0.00766375	NA	NA	NA	NA	NA	NA	NA	NA	0.00766375	0	300tzfg
104221	2018033	14	1552743	1829937	2266	d__Bacteria	Firmicutes_A	c__Clostridia	o__4C28d-15	f__CAG-727	g__	s__	f__CAG-727	f__CAG-727:104221	25181	24434	NA	NA	24307	NA	NA	NA	NA	NA	0.0162171	0.015736	NA	NA	0.0156542	NA	NA	NA	NA	NA	2	dmp;lld2_fsk
104234	2648908	10	1659603	2352747	754	d__Bacteria	Firmicutes	c__Bacilli	o__Erysipelotrichales	f__Erysipelatoclostridiaceae	g__Massiliomicrobiota	s__GCF_002160815.1	s__GCF_002160815.1	s__GCF_002160815.1:104234	1061	NA	NA	NA	NA	NA	NA	NA	1061	NA	0.00063931	NA	NA	NA	NA	NA	NA	NA	0.00063931	NA	0	ibd
104236	2105733	39	1614084	1785267	4515	d__Bacteria	Firmicutes_A	c__Clostridia	o__Oscillospirales	f__DTU089	g__	s__	f__DTU089	f__DTU089:104236	18248	NA	13215	15599	NA	13873	NA	12939	10540	NA	0.0113055	NA	0.00818731	0.0096643	NA	0.00859497	NA	0.00801631	0.00653002	NA	3	lld1;lld2_apk;500fg_apk;300ob;ibd
104245	2149665	499	1351201	1906584	14171	d__Bacteria	Firmicutes_A	c__Clostridia	o__Christensenellales	f__CAG-138	g__	s__	f__CAG-138	f__CAG-138:104245	45161	32005	32148	32399	31943	30905	31683	31252	NA	32502	0.0334229	0.0236863	0.0237922	0.0239779	0.0236405	0.0228722	0.023448	0.0231291	NA	0.0240542	6	dmp;lld1;lld2_apk;lld2_fsk;500fg_apk;500fg_fsk;300ob;300tzfg
104248	3100645	27	1587989	2692980	8579	d__Bacteria	Firmicutes_A	c__Clostridia	o__Oscillospirales	f__Oscillospiraceae	g__CAG-170	s__GCA_000436735.1	s__GCA_000436735.1	s__GCA_000436735.1:104248	49097	38008	NA	2824	39121	NA	37934	3212	NA	37522	0.0309177	0.0239347	NA	0.00177835	0.0246356	NA	0.0238881	0.00202268	NA	0.0236286	4	dmp;lld2_apk;lld2_fsk;500fg_fsk;300ob;300tzfg
104250	3091301	107	1970497	2756466	22367	d__Bacteria	Firmicutes_A	c__Clostridia	o__Lachnospirales	f__Lachnospiraceae	g__CAG-65	s__	g__CAG-65	g__CAG-65:104250	21924	11332	6596	11297	11678	2494	12550	9200	NA	15785	0.0111261	0.00575083	0.00334738	0.00573307	0.00592642	0.00126567	0.00636895	0.00466887	NA	0.00801067	6	dmp;lld1;lld2_apk;lld2_fsk;500fg_apk;500fg_fsk;300ob;300tzfg
104252	2136182	16	1614918	1866393	3907	d__Bacteria	Firmicutes_A	c__Clostridia	o__Oscillospirales	f__Oscillospiraceae	g__NK3B98	s__	g__NK3B98	g__NK3B98:104252	52512	38515	37022	39079	38228	38557	40800	38830	NA	40662	0.0325168	0.0238495	0.022925	0.0241988	0.0236718	0.0238755	0.0252644	0.0240446	NA	0.025179	6	dmp;lld1;lld2_apk;lld2_fsk;500fg_apk;500fg_fsk;300ob;300tzfg
104256	2326403	304	1749417	2059515	13920	d__Bacteria	Firmicutes_A	c__Clostridia	o__Oscillospirales	f__DTU089	g__CAG-177	s__	g__CAG-177	g__CAG-177:104256	15693	NA	NA	NA	NA	NA	NA	NA	NA	15693	0.00897042	NA	NA	NA	NA	NA	NA	NA	NA	0.00897042	0	300tzfg
104262	2843289	32	1536473	2388480	15170	d__Bacteria	Firmicutes_A	c__Clostridia	o__Oscillospirales	f__Oscillospiraceae	g__CAG-110	s__	g__CAG-110	g__CAG-110:104262	21739	14889	NA	1712	13781	NA	14049	NA	NA	16217	0.0141486	0.00969038	NA	0.00111424	0.00896924	NA	0.00914367	NA	NA	0.0105547	4	dmp;lld2_apk;lld2_fsk;500fg_fsk;300tzfg
104275	2322408	17	1522315	2038260	4106	d__Bacteria	Firmicutes_A	c__Clostridia	o__Oscillospirales	f__Ruminococcaceae	g__Ruminococcus_C	s__GCA_000437175.1	s__GCA_000437175.1	s__GCA_000437175.1:104275	16961	NA	NA	NA	NA	NA	NA	NA	NA	16961	0.0111416	NA	NA	NA	NA	NA	NA	NA	NA	0.0111416	0	300tzfg
104296	2845901	16	1828450	2461785	5056	d__Bacteria	Firmicutes_A	c__Clostridia	o__Lachnospirales	f__Lachnospiraceae	g__Ruminococcus_A	s__GCA_000437095.1	s__GCA_000437095.1	s__GCA_000437095.1:104296	13907	NA	8519	10975	NA	7391	NA	5361	NA	6457	0.0076059	NA	0.00465914	0.00600235	NA	0.00404222	NA	0.00293199	NA	0.00353141	3	lld1;lld2_apk;500fg_apk;300ob;300tzfg
104308	3351108	43	1374943	2837373	7366	d__Bacteria	Firmicutes_A	c__Clostridia	o__Peptostreptococcales	f__Anaerovoracaceae	g__CAG-145	s__GCA_000435615.1	s__GCA_000435615.1	s__GCA_000435615.1:104308	13630	1590	NA	NA	2488	NA	1588	NA	NA	12094	0.00991314	0.00115641	NA	NA	0.00180953	NA	0.00115496	NA	NA	0.008796	3	dmp;lld2_fsk;500fg_fsk;300tzfg
104317	2865229	288	1969749	2571483	9941	d__Bacteria	Firmicutes_A	c__Clostridia	o__Lachnospirales	f__Lachnospiraceae	g__Lachnospira	s__GCA_000431735.1	s__GCA_000431735.1	s__GCA_000431735.1:104317	10915	1866	1601	6575	4819	5858	6247	6411	NA	6273	0.00554132	0.000947329	0.000812794	0.00333799	0.0024465	0.00297398	0.00317147	0.00325473	NA	0.00318467	6	dmp;lld1;lld2_apk;lld2_fsk;500fg_apk;500fg_fsk;300ob;300tzfg
104323	2315750	746	1636733	2022273	7709	d__Bacteria	Firmicutes_A	c__Clostridia	o__Oscillospirales	f__DTU089	g__CAG-180	s__GCA_000432435.1	s__GCA_000432435.1	s__GCA_000432435.1:104323	26382	15932	16301	16191	15323	15727	15417	16406	12647	17669	0.0161187	0.00973403	0.00995947	0.00989227	0.00936194	0.00960878	0.00941937	0.0100236	0.00772698	0.0107953	6	dmp;lld1;lld2_apk;lld2_fsk;500fg_apk;500fg_fsk;300ob;ibd;300tzfg
104329	2683182	108	1857392	2242839	16621	d__Bacteria	Bacteroidota	c__Bacteroidia	o__Bacteroidales	f__Bacteroidaceae	g__Prevotellamassilia	s__	g__Prevotellamassilia	g__Prevotellamassilia:104329	73799	NA	NA	NA	NA	NA	NA	42281	NA	60837	0.0397326	NA	NA	NA	NA	NA	NA	0.0227636	NA	0.032754	0	300ob;300tzfg
104337	1917494	391	1406867	1731615	8515	d__Bacteria	Firmicutes_C	c__Negativicutes	o__Acidaminococcales	f__Acidaminococcaceae	g__CAG-207	s__GCA_000436095.1	s__GCA_000436095.1	s__GCA_000436095.1:104337	46363	34873	NA	14093	33619	NA	NA	13877	NA	NA	0.0329548	0.0247877	NA	0.0100173	0.0238964	NA	NA	0.00986376	NA	NA	3	dmp;lld2_apk;lld2_fsk;300ob
104341	2817286	39	2055125	2439489	2542	d__Bacteria	Firmicutes_A	c__Clostridia	o__Oscillospirales	f__Oscillospiraceae	g__CAG-110	s__GCA_000435995.1	s__GCA_000435995.1	s__GCA_000435995.1:104341	29685	23275	17275	26538	22284	NA	3717	25816	NA	NA	0.0144444	0.0113253	0.00840581	0.0129131	0.0108431	NA	0.00180865	0.0125618	NA	NA	5	dmp;lld1;lld2_apk;lld2_fsk;500fg_fsk;300ob
104345	1843152	292	1383411	1519347	3411	d__Bacteria	Firmicutes	c__Bacilli	o__Lactobacillales	f__Streptococcaceae	g__Streptococcus	s__Streptococcus thermophilus	s__Streptococcus thermophilus	s__Streptococcus thermophilus:104345	9361	NA	8118	7465	NA	8454	3576	7617	8473	NA	0.00676661	NA	0.0058681	0.00539608	NA	0.00611098	0.00258492	0.00550596	0.00612472	NA	4	lld1;lld2_apk;500fg_apk;500fg_fsk;300ob;ibd
104379	1165483	56	886021	1051746	5851	d__Bacteria	Firmicutes	c__Bacilli	o__RF39	f__UBA660	g__CAG-628	s__GCA_000438415.1	s__GCA_000438415.1	s__GCA_000438415.1:104379	1158	NA	NA	1158	NA	NA	NA	NA	NA	NA	0.00130697	NA	NA	0.00130697	NA	NA	NA	NA	NA	NA	1	lld2_apk
104385	2794150	16	2092993	2344413	5531	d__Bacteria	Firmicutes_A	c__Clostridia	o__Lachnospirales	f__Lachnospiraceae	g__Lachnospira	s__	g__Lachnospira	g__Lachnospira:104385	14489	NA	NA	NA	NA	NA	NA	NA	NA	14489	0.00692262	NA	NA	NA	NA	NA	NA	NA	NA	0.00692262	0	300tzfg
104388	2069510	38	1633828	1819461	15628	d__Bacteria	Firmicutes_A	c__Clostridia	o__Oscillospirales	f__Oscillospiraceae	g__F23-B02	s__F23-B02 sp6	s__F23-B02 sp6	s__F23-B02 sp6:104388	25077	22132	18123	22246	22106	8389	20268	21508	NA	NA	0.0153486	0.0135461	0.0110924	0.0136159	0.0135302	0.00513457	0.0124052	0.0131642	NA	NA	6	dmp;lld1;lld2_apk;lld2_fsk;500fg_apk;500fg_fsk;300ob
104390	3321071	144	1874248	2912601	20711	d__Bacteria	Bacteroidota	c__Bacteroidia	o__Bacteroidales	f__Bacteroidaceae	g__Prevotella	s__GCF_002265625.1	s__GCF_002265625.1	s__GCF_002265625.1:104390	66315	NA	NA	NA	NA	NA	NA	NA	NA	66315	0.0353822	NA	NA	NA	NA	NA	NA	NA	NA	0.0353822	0	300tzfg
104392	2249845	29	1410638	2016690	7031	d__Bacteria	Firmicutes_A	c__Clostridia	o__Oscillospirales	f__DTU089	g__Eubacterium_R	s__	g__Eubacterium_R	g__Eubacterium_R:104392	3853	NA	NA	NA	NA	NA	NA	NA	NA	3853	0.00273139	NA	NA	NA	NA	NA	NA	NA	NA	0.00273139	0	300tzfg
104402	3041322	198	1800227	2784129	19738	d__Bacteria	Bacteroidota	c__Bacteroidia	o__Bacteroidales	f__UBA932	g__RC9	s__GCA_000432515.1	s__GCA_000432515.1	s__GCA_000432515.1:104402	19339	NA	NA	NA	NA	NA	NA	NA	NA	19339	0.0107425	NA	NA	NA	NA	NA	NA	NA	NA	0.0107425	0	300tzfg
104431	3628651	181	2450083	3271389	21419	d__Bacteria	Firmicutes_A	c__Clostridia	o__Lachnospirales	f__Lachnospiraceae	g__COE1	s__GCA_001916965.1	s__GCA_001916965.1	s__GCA_001916965.1:104431	70476	3487	NA	42454	12084	NA	32446	36057	NA	51628	0.0287647	0.00142322	NA	0.0173276	0.00493208	NA	0.0132428	0.0147166	NA	0.0210719	4	dmp;lld2_apk;lld2_fsk;500fg_fsk;300ob;300tzfg
104451	1637408	151	1289098	1483347	4797	d__Bacteria	Firmicutes	c__Bacilli	o__ML615J-28	f__CAG-313	g__CAG-313	s__GCA_000433995.1	s__GCA_000433995.1	s__GCA_000433995.1:104451	18222	12867	NA	NA	14694	NA	11933	NA	NA	6978	0.0141355	0.0099814	NA	NA	0.0113987	NA	0.00925686	NA	NA	0.00541309	3	dmp;lld2_fsk;500fg_fsk;300tzfg
104463	2535016	26	1608798	2154774	6688	d__Bacteria	Firmicutes_A	c__Clostridia	o__Oscillospirales	f__Oscillospiraceae	g__CAG-83	s__	g__CAG-83	g__CAG-83:104463	42220	33426	30604	32961	33108	16685	32702	31119	NA	31256	0.0262432	0.020777	0.0190229	0.020488	0.0205793	0.0103711	0.020327	0.019343	NA	0.0194282	6	dmp;lld1;lld2_apk;lld2_fsk;500fg_apk;500fg_fsk;300ob;300tzfg
104474	3090898	163	1953619	2673756	22933	d__Bacteria	Bacteroidota	c__Bacteroidia	o__Bacteroidales	f__Muribaculaceae	g__CAG-279	s__	g__CAG-279	g__CAG-279:104474	79998	NA	NA	NA	NA	NA	NA	9474	NA	76539	0.0409486	NA	NA	NA	NA	NA	NA	0.00484946	NA	0.0391781	0	300ob;300tzfg
104487	2311232	15	1623119	2039148	3476	d__Bacteria	Firmicutes_A	c__Clostridia	o__Oscillospirales	f__Oscillospiraceae	g__CAG-83	s__	g__CAG-83	g__CAG-83:104487	19255	15266	NA	1584	14927	NA	14287	NA	NA	12379	0.011863	0.00940535	NA	0.000975899	0.00919649	NA	0.00880219	NA	NA	0.00762667	4	dmp;lld2_apk;lld2_fsk;500fg_fsk;300tzfg
104491	3049586	19	1804001	2658456	8609	d__Bacteria	Bacteroidota	c__Bacteroidia	o__Bacteroidales	f__Bacteroidaceae	g__Prevotella	s__	g__Prevotella	g__Prevotella:104491	33173	NA	NA	NA	NA	NA	NA	NA	NA	33173	0.0183886	NA	NA	NA	NA	NA	NA	NA	NA	0.0183886	0	300tzfg
104498	1784286	76	1455833	1617897	4040	d__Bacteria	Firmicutes	c__Bacilli	o__RFN20	f__CAG-288	g__CAG-345	s__GCA_000433315.1	s__GCA_000433315.1	s__GCA_000433315.1:104498	12175	9401	NA	NA	9817	NA	7903	NA	NA	NA	0.00836291	0.00645747	NA	NA	0.00674322	NA	0.00542851	NA	NA	NA	3	dmp;lld2_fsk;500fg_fsk
104526	2036811	259	1632686	1822602	13063	d__Bacteria	Firmicutes_A	c__Clostridia	o__Oscillospirales	f__Oscillospiraceae	g__CAG-103	s__GCA_000432375.1	s__GCA_000432375.1	s__GCA_000432375.1:104526	6529	4364	4270	4519	4605	4521	4393	4454	2173	3964	0.00399893	0.0026729	0.00261532	0.00276783	0.00282051	0.00276906	0.00269066	0.00272802	0.00133094	0.0024279	6	dmp;lld1;lld2_apk;lld2_fsk;500fg_apk;500fg_fsk;300ob;ibd;300tzfg
104533	1894945	327	1465855	1694403	7420	d__Bacteria	Proteobacteria	c__Alphaproteobacteria	o__RF32	f__CAG-239	g__CAG-495	s__GCA_000436375.1	s__GCA_000436375.1	s__GCA_000436375.1:104533	46031	43927	NA	2213	43333	NA	31871	NA	NA	NA	0.0314022	0.0299668	NA	0.0015097	0.0295616	NA	0.0217423	NA	NA	NA	4	dmp;lld2_apk;lld2_fsk;500fg_fsk
104544	2598681	78	1930993	2242326	8542	d__Bacteria	Bacteroidota	c__Bacteroidia	o__Bacteroidales	f__Rikenellaceae	g__Alistipes	s__GCF_002159425.1	s__GCF_002159425.1	s__GCF_002159425.1:104544	10421	1141	NA	NA	10222	NA	NA	NA	NA	NA	0.00539671	0.000590888	NA	NA	0.00529365	NA	NA	NA	NA	NA	2	dmp;lld2_fsk
104557	2548917	27	1803013	2301243	10551	d__Bacteria	Firmicutes_A	c__Clostridia	o__Oscillospirales	f__Oscillospiraceae	g__	s__	f__Oscillospiraceae	f__Oscillospiraceae:104557	45686	42468	NA	NA	30999	NA	34193	NA	NA	NA	0.0253387	0.0235539	NA	NA	0.0171929	NA	0.0189644	NA	NA	NA	3	dmp;lld2_fsk;500fg_fsk
104593	2993454	147	1945510	2688306	14897	d__Bacteria	Firmicutes_A	c__Clostridia	o__Lachnospirales	f__Lachnospiraceae	g__CAG-194	s__CAG-194 sp1	s__CAG-194 sp1	s__CAG-194 sp1:104593	40273	NA	18976	13629	NA	12994	19205	22545	NA	33310	0.0207005	NA	0.00975374	0.00700536	NA	0.00667897	0.00987145	0.0115882	NA	0.0171215	4	lld1;lld2_apk;500fg_apk;500fg_fsk;300ob;300tzfg
104600	2155023	182	1468283	1929573	6222	d__Bacteria	Firmicutes	c__Bacilli	o__Acholeplasmatales	f__CAG-307	g__CAG-307	s__GCA_000437575.1	s__GCA_000437575.1	s__GCA_000437575.1:104600	15363	10854	NA	NA	12872	NA	1240	NA	NA	1927	0.0104632	0.00739231	NA	NA	0.0087667	NA	0.000844524	NA	NA	0.00131242	3	dmp;lld2_fsk;500fg_fsk;300tzfg
104639	1934574	137	1531462	1728084	7103	d__Bacteria	Proteobacteria	c__Alphaproteobacteria	o__RF32	f__CAG-239	g__CAG-495	s__GCA_000432275.1	s__GCA_000432275.1	s__GCA_000432275.1:104639	25633	23456	NA	NA	16248	NA	NA	NA	NA	NA	0.0167376	0.0153161	NA	NA	0.0106095	NA	NA	NA	NA	NA	2	dmp;lld2_fsk
104643	2002415	116	1673716	1823412	8537	d__Bacteria	Firmicutes_A	c__Clostridia	o__Oscillospirales	f__DTU089	g__Eubacterium_R	s__	g__Eubacterium_R	g__Eubacterium_R:104643	13592	NA	NA	NA	NA	NA	NA	NA	NA	13592	0.00812085	NA	NA	NA	NA	NA	NA	NA	NA	0.00812085	0	300tzfg
104644	2521954	20	1835015	2140953	10964	d__Bacteria	Firmicutes_A	c__Clostridia	o__Oscillospirales	f__Ruminococcaceae	g__Negativibacillus	s__	g__Negativibacillus	g__Negativibacillus:104644	80777	69874	10840	59182	69930	NA	51351	12306	10706	NA	0.0440198	0.0380782	0.00590731	0.0322515	0.0381087	NA	0.027984	0.00670621	0.00583428	NA	5	dmp;lld1;lld2_apk;lld2_fsk;500fg_fsk;300ob;ibd

## Sheet: Table S5_PCs
Table S5. The eigenvalues of top-10 and top-20 principal components (PCs) of each species.
Kingdom	Phylum	Class	Order	Family	Genus	Species	Name	NameID	SpeciesID	PC1	PC2	PC3	PC4	PC5	PC6	PC7	PC8	PC9	PC10	PC11	PC12	PC13	PC14	PC15	PC16	PC17	PC18	PC19	PC20	Top10	Top20	SampleSize
d__Bacteria	Firmicutes_A	c__Clostridia	o__Lachnospirales	f__Lachnospiraceae	g__Blautia_A	s__GCA_900066165.1	s__GCA_900066165.1	s__GCA_900066165.1:100002	100002	0.0025357	0.00218987	0.00196541	0.0017296	0.00157273	0.00145412	0.0012511	0.00108805	0.00098469	0.00094605	0.00082186	0.0007959	0.0007681	0.00066473	0.00064692	0.00063422	0.00060133	0.00058243	0.00057629	0.0005652	0.0157173	0.0223743	6799
d__Bacteria	Firmicutes_A	c__Clostridia	o__Lachnospirales	f__Lachnospiraceae	g__Coprococcus	s__Coprococcus eutactus	s__Coprococcus eutactus	s__Coprococcus eutactus:100018	100018	0.170274	0.0746055	0.0447869	0.0376739	0.036827	0.0288989	0.0277864	0.0240876	0.0220481	0.02071	0.0181693	0.0174129	0.0160872	0.0157446	0.0144856	0.014277	0.0141985	0.0137906	0.01335	0.0128066	0.487698	0.63802	79
d__Bacteria	Firmicutes_A	c__Clostridia	o__Oscillospirales	f__Ruminococcaceae	g__Faecalibacterium	s__Faecalibacterium prausnitzii_C	s__Faecalibacterium prausnitzii_C	s__Faecalibacterium prausnitzii_C:100022	100022	0.00407763	0.00214292	0.00178174	0.00159867	0.00150825	0.00145246	0.00130194	0.00104177	0.00094906	0.00091993	0.00087984	0.00082038	0.00078326	0.00074689	0.0007242	0.00066417	0.00064529	0.00062244	0.00062015	0.00060409	0.0167744	0.0238851	10204
d__Bacteria	Firmicutes_C	c__Negativicutes	o__Selenomonadales	f__Selenomonadaceae	g__Mitsuokella	s__Mitsuokella jalaludinii	s__Mitsuokella jalaludinii	s__Mitsuokella jalaludinii:100027	100027	0.375584	0.201331	0.0803234	0.0426426	0.038296	0.0286023	0.0243302	0.0166617	0.0138411	0.0121396	0.0112457	0.00968313	0.0091947	0.00802252	0.00778887	0.00753216	0.00722634	0.00702875	0.00689981	0.00676275	0.833752	0.915136	37
d__Bacteria	Firmicutes_A	c__Clostridia	o__Lachnospirales	f__Lachnospiraceae	g__Anaerostipes	s__Anaerostipes hadrus_A	s__Anaerostipes hadrus_A	s__Anaerostipes hadrus_A:100028	100028	0.0157421	0.0117849	0.0102375	0.00971282	0.00768356	0.00638697	0.00603534	0.00568327	0.00545018	0.00517538	0.00493085	0.00439454	0.00383533	0.0037382	0.00351646	0.00350753	0.00344004	0.00325901	0.00305815	0.00301741	0.083892	0.12059	1359
d__Bacteria	Bacteroidota	c__Bacteroidia	o__Bacteroidales	f__Bacteroidaceae	g__Bacteroides	s__Bacteroides finegoldii	s__Bacteroides finegoldii	s__Bacteroides finegoldii:100029	100029	0.0336823	0.0196087	0.00903035	0.00732023	0.00598144	0.0043397	0.0039853	0.00383173	0.00344136	0.00295186	0.0029194	0.00259703	0.00230361	0.00223345	0.0021133	0.00180021	0.00171841	0.00156078	0.0015069	0.00148147	0.0941729	0.114407	1833
d__Bacteria	Firmicutes_A	c__Clostridia	o__Lachnospirales	f__Lachnospiraceae	g__CAG-603	s__GCA_900066105.1	s__GCA_900066105.1	s__GCA_900066105.1:100030	100030	0.140504	0.0630639	0.0528473	0.0449252	0.0424051	0.0398898	0.0362328	0.0324023	0.0293435	0.027939	0.026409	0.0260915	0.0230462	0.0225385	0.0219085	0.0201359	0.0200116	0.0191509	0.0185361	0.0180211	0.509553	0.725403	48
d__Bacteria	Firmicutes_A	c__Clostridia	o__CAG-41	f__UBA1381	g__CAG-41	s__CAG-41 sp1	s__CAG-41 sp1	s__CAG-41 sp1:100033	100033	0.00645308	0.00410494	0.00396864	0.00329994	0.002565	0.00188188	0.00160973	0.00133595	0.00110783	0.00107133	0.00101976	0.00097027	0.00091573	0.00086706	0.00082012	0.00074417	0.00071317	0.00064928	0.00063233	0.00062434	0.0273983	0.0353546	4127
d__Bacteria	Firmicutes_A	c__Clostridia	o__Oscillospirales	f__DTU089	g__GCA-900066995	s__GCA_900066995.1	s__GCA_900066995.1	s__GCA_900066995.1:100036	100036	0.0736048	0.0527716	0.0400143	0.0287994	0.0251974	0.0233088	0.0199754	0.0181524	0.016363	0.0155856	0.0148283	0.0136165	0.0132927	0.0130432	0.0121247	0.0119875	0.0115895	0.010899	0.0107636	0.010602	0.313773	0.43652	129
d__Bacteria	Firmicutes_A	c__Clostridia	o__Lachnospirales	f__Lachnospiraceae	g__Dorea	s__Dorea longicatena	s__Dorea longicatena	s__Dorea longicatena:100038	100038	0.0097924	0.00576838	0.00513918	0.00439311	0.00415046	0.00354559	0.00278402	0.00240196	0.00216818	0.00215628	0.00205638	0.00198181	0.00186071	0.00182338	0.0017477	0.0016578	0.00164281	0.0015838	0.00153078	0.00151705	0.0422995	0.0597018	3605
d__Bacteria	Firmicutes_A	c__Clostridia	o__Oscillospirales	f__Ruminococcaceae	g__Faecalibacterium	s__Faecalibacterium prausnitzii	s__Faecalibacterium prausnitzii	s__Faecalibacterium prausnitzii:100039	100039	0.00717641	0.0052413	0.00296096	0.00239921	0.00175524	0.00164929	0.00163592	0.0015853	0.00153196	0.00148793	0.00140103	0.00137723	0.00135652	0.00125833	0.00120838	0.00118628	0.00115682	0.00110638	0.00102281	0.00099174	0.0274235	0.039489	1927
d__Bacteria	Firmicutes_A	c__Clostridia	o__Lachnospirales	f__Lachnospiraceae	g__CAG-65	s__GCA_900066365.1	s__GCA_900066365.1	s__GCA_900066365.1:100041	100041	0.0139682	0.00594004	0.00455173	0.00309363	0.00268089	0.00239539	0.00189576	0.0018343	0.00167144	0.00152565	0.00139147	0.00134449	0.00130112	0.00127366	0.00119542	0.00118935	0.00115264	0.00113158	0.00110926	0.00109072	0.0395571	0.0517368	5197
d__Bacteria	Bacteroidota	c__Bacteroidia	o__Bacteroidales	f__Tannerellaceae	g__Parabacteroides	s__Parabacteroides merdae	s__Parabacteroides merdae	s__Parabacteroides merdae:100044	100044	0.0101074	0.00958146	0.00537673	0.00409071	0.00358798	0.00351375	0.00292488	0.00238894	0.00222959	0.00192585	0.00180094	0.00155689	0.00139112	0.00131873	0.0011823	0.00112558	0.00099625	0.00093188	0.00087944	0.00086681	0.0457272	0.0577772	7281
d__Bacteria	Firmicutes	c__Bacilli	o__Erysipelotrichales	f__Erysipelatoclostridiaceae	g__Erysipelatoclostridium	s__GCF_000752095.2	s__GCF_000752095.2	s__GCF_000752095.2:100045	100045	0.0164647	0.00858292	0.0047599	0.00317486	0.00293792	0.00262409	0.0024046	0.00234852	0.0019906	0.00191331	0.00186201	0.00178657	0.00171753	0.00165019	0.00157076	0.00149949	0.00146704	0.00136155	0.00132976	0.00130021	0.0472014	0.0627465	1748
d__Bacteria	Firmicutes_A	c__Clostridia	o__Peptostreptococcales	f__Peptostreptococcaceae	g__Intestinibacter	s__Intestinibacter bartlettii	s__Intestinibacter bartlettii	s__Intestinibacter bartlettii:100062	100062	0.00522908	0.0035045	0.00238125	0.00184715	0.00150196	0.00139356	0.0010689	0.00101754	0.00097734	0.00092376	0.00089792	0.00084854	0.00083284	0.00080498	0.0007878	0.00078017	0.00076475	0.00075338	0.00074518	0.00073817	0.019845	0.0277988	1921
d__Bacteria	Firmicutes_A	c__Clostridia	o__Oscillospirales	f__DTU089	g__Clostridium_A	s__Clostridium_A leptum	s__Clostridium_A leptum	s__Clostridium_A leptum:100069	100069	0.00458318	0.00416502	0.00302126	0.00207885	0.00171978	0.00146475	0.00118024	0.00099459	0.00095424	0.00091722	0.00081059	0.00073325	0.00070926	0.0006993	0.00068594	0.00065744	0.00065652	0.00063988	0.00063195	0.00060233	0.0210791	0.0279056	2702
d__Bacteria	Firmicutes_A	c__Clostridia	o__Oscillospirales	f__Oscillospiraceae	g__Clostridium_AJ	s__GCA_900066825.1	s__GCA_900066825.1	s__GCA_900066825.1:100070	100070	0.0726539	0.019863	0.0150469	0.00992751	0.00566359	0.00472802	0.00439637	0.00391674	0.00355299	0.00329351	0.0030576	0.00299261	0.00269734	0.00266197	0.00246476	0.0024559	0.00226745	0.00223085	0.00217236	0.00211448	0.143043	0.168158	802
d__Bacteria	Firmicutes_A	c__Clostridia	o__Oscillospirales	f__Ruminococcaceae	g__UBA1394	s__GCA_900066845.1	s__GCA_900066845.1	s__GCA_900066845.1:100072	100072	0.0829986	0.0735515	0.0521484	0.0324629	0.0281188	0.0248977	0.0183434	0.0162885	0.0157816	0.0151121	0.0140809	0.0125395	0.0120601	0.0115446	0.0112304	0.011002	0.0108407	0.0107477	0.0104482	0.0102608	0.359703	0.474459	100
d__Bacteria	Bacteroidota	c__Bacteroidia	o__Bacteroidales	f__Rikenellaceae	g__Alistipes	s__Alistipes onderdonkii	s__Alistipes onderdonkii	s__Alistipes onderdonkii:100074	100074	0.00886828	0.00481719	0.00331392	0.00240527	0.00171268	0.00150111	0.00141115	0.00105045	0.00087082	0.00075928	0.00069145	0.00064788	0.00059753	0.00056821	0.0005275	0.00049107	0.00048188	0.00046129	0.00042388	0.00041758	0.0267101	0.0320184	8152
d__Bacteria	Firmicutes_A	c__Clostridia	o__Lachnospirales	f__Lachnospiraceae	g__Roseburia	s__Roseburia intestinalis	s__Roseburia intestinalis	s__Roseburia intestinalis:100076	100076	0.00521334	0.00363749	0.00267127	0.00242291	0.00234194	0.00222398	0.00206897	0.00200689	0.00192626	0.00189474	0.00184119	0.00181075	0.001713	0.00167646	0.00165837	0.00157389	0.00152006	0.00149684	0.00143626	0.0014288	0.0264078	0.0425634	3872
d__Bacteria	Firmicutes_A	c__Clostridia	o__Lachnospirales	f__Lachnospiraceae	g__Eubacterium_E	s__Eubacterium_E hallii_A	s__Eubacterium_E hallii_A	s__Eubacterium_E hallii_A:100077	100077	0.0271056	0.0126507	0.00922523	0.00550429	0.00395747	0.0037141	0.0033576	0.0032236	0.0031792	0.00293107	0.00288832	0.00274688	0.0025187	0.0024202	0.00238449	0.0023085	0.00219765	0.00215499	0.00208323	0.0020044	0.0748488	0.0985562	1335
d__Bacteria	Firmicutes_A	c__Clostridia	o__Lachnospirales	f__Lachnospiraceae	g__Lachnospira	s__Lachnospira rogosae	s__Lachnospira rogosae	s__Lachnospira rogosae:100078	100078	0.00430454	0.00378485	0.00349852	0.00335765	0.0033053	0.00300617	0.00293324	0.00277571	0.00254936	0.00249832	0.00240719	0.00229916	0.00227573	0.00224699	0.00212833	0.0021218	0.00204358	0.00199443	0.00198059	0.00189993	0.0320136	0.0534114	2528
d__Bacteria	Firmicutes_A	c__Clostridia	o__Oscillospirales	f__Ruminococcaceae	g__Subdoligranulum	s__Subdoligranulum formicilis	s__Subdoligranulum formicilis	s__Subdoligranulum formicilis:100084	100084	0.0033829	0.00300034	0.002757	0.00257944	0.00233948	0.00214427	0.0017624	0.0014188	0.00134399	0.00120621	0.00116771	0.00114881	0.00111512	0.00092223	0.00086921	0.00084717	0.00079373	0.0007303	0.00069821	0.00064908	0.0219348	0.0308764	9895
d__Bacteria	Firmicutes_A	c__Clostridia	o__Oscillospirales	f__Oscillospiraceae	g__Clostridium_AJ	s__	g__Clostridium_AJ	g__Clostridium_AJ:100086	100086	0.0543727	0.0298563	0.0125001	0.0103446	0.00803798	0.00619434	0.00578479	0.00439392	0.0038768	0.0036888	0.00352309	0.0034247	0.0033082	0.00316216	0.00312767	0.00299135	0.00295705	0.00290143	0.00288691	0.00277907	0.13905	0.170112	852
d__Bacteria	Firmicutes_A	c__Clostridia	o__Lachnospirales	f__Lachnospiraceae	g__CAG-81	s__GCA_000435795.1	s__GCA_000435795.1	s__GCA_000435795.1:100087	100087	0.0210473	0.017151	0.00900256	0.00726907	0.00513413	0.00355314	0.00350739	0.00276822	0.00227735	0.0021375	0.00201355	0.00197373	0.00195072	0.00166148	0.00152178	0.00149083	0.00144229	0.00139946	0.00130507	0.00128649	0.0738477	0.089893	1875
d__Bacteria	Firmicutes_A	c__Clostridia	o__Oscillospirales	f__Ruminococcaceae	g__CAG-353	s__GCA_900066885.1	s__GCA_900066885.1	s__GCA_900066885.1:100089	100089	0.0332812	0.0263883	0.0190858	0.0140777	0.0124479	0.0112386	0.00979844	0.00957412	0.00950263	0.00757032	0.00665753	0.00636069	0.00559819	0.00504883	0.0047236	0.00415164	0.00409289	0.00369164	0.0034341	0.00266798	0.152965	0.199392	1506
d__Bacteria	Firmicutes_A	c__Clostridia	o__Oscillospirales	f__Oscillospiraceae	g__Flavonifractor	s__Flavonifractor plautii	s__Flavonifractor plautii	s__Flavonifractor plautii:100099	100099	0.00239674	0.00148839	0.00140292	0.00104198	0.0008447	0.00054186	0.00051041	0.00048382	0.00045138	0.00041906	0.0003741	0.0003591	0.00034676	0.0003222	0.00030226	0.00029748	0.0002891	0.00028452	0.00026755	0.00026378	0.00958128	0.0126881	6370
d__Bacteria	Bacteroidota	c__Bacteroidia	o__Bacteroidales	f__Bacteroidaceae	g__Bacteroides	s__Bacteroides clarus	s__Bacteroides clarus	s__Bacteroides clarus:100105	100105	0.0189227	0.0129751	0.0104086	0.00792188	0.00754001	0.00580455	0.00541424	0.00521677	0.00471379	0.00445849	0.00400139	0.00362068	0.00320147	0.00306943	0.00267517	0.00259085	0.00242887	0.00228345	0.00218792	0.00214643	0.0833761	0.111582	2134
d__Bacteria	Firmicutes	c__Bacilli	o__Lactobacillales	f__Streptococcaceae	g__Streptococcus	s__Streptococcus salivarius	s__Streptococcus salivarius	s__Streptococcus salivarius:100113	100113	0.0146248	0.00786524	0.00570308	0.00500643	0.00302026	0.00289183	0.00269519	0.00229436	0.00215235	0.00188636	0.00180832	0.00169856	0.0016498	0.00161104	0.00153595	0.00142784	0.0013815	0.00130721	0.00128486	0.0012625	0.0481399	0.0631075	2304
d__Bacteria	Firmicutes_A	c__Clostridia	o__Lachnospirales	f__Lachnospiraceae	g__Blautia	s__Blautia producta_A	s__Blautia producta_A	s__Blautia producta_A:100123	100123	0.166385	0.0804553	0.0608379	0.0490427	0.0373857	0.0339852	0.0267842	0.0237222	0.0199397	0.0190586	0.0162122	0.0155639	0.0152219	0.0148795	0.0143733	0.0140438	0.0132277	0.0129946	0.0125206	0.0119378	0.517596	0.658571	77
d__Bacteria	Firmicutes_A	c__Clostridia	o__Lachnospirales	f__Lachnospiraceae	g__Blautia_A	s__GCA_000433815.1	s__GCA_000433815.1	s__GCA_000433815.1:100133	100133	0.0849165	0.0286697	0.0140757	0.00889823	0.0087896	0.00811324	0.00785911	0.00750325	0.00735682	0.00703035	0.00682602	0.00680838	0.00675177	0.00662797	0.00654197	0.00646091	0.00644989	0.00631127	0.00626167	0.00617965	0.183212	0.248432	204
d__Bacteria	Firmicutes_A	c__Clostridia	o__Lachnospirales	f__Lachnospiraceae	g__Agathobacter	s__GCA_000434275.1	s__GCA_000434275.1	s__GCA_000434275.1:100136	100136	0.0128047	0.00792518	0.00621916	0.00444827	0.00422973	0.00348412	0.00314926	0.0031268	0.00302801	0.00266818	0.00259373	0.00243881	0.0023751	0.00216415	0.00210106	0.00200866	0.00194456	0.00190022	0.00187817	0.00182729	0.0510834	0.0723152	1472
d__Bacteria	Bacteroidota	c__Bacteroidia	o__Bacteroidales	f__Tannerellaceae	g__Parabacteroides	s__Parabacteroides johnsonii	s__Parabacteroides johnsonii	s__Parabacteroides johnsonii:100138	100138	0.0477306	0.0377925	0.0175523	0.0134709	0.00825806	0.00695623	0.00537049	0.00512053	0.00447626	0.00419004	0.00340351	0.00332843	0.0029821	0.00291281	0.0027666	0.00256327	0.00251684	0.00230716	0.00227356	0.00219502	0.150918	0.178167	941
d__Bacteria	Firmicutes_A	c__Clostridia	o__Lachnospirales	f__Lachnospiraceae	g__CAG-156	s__GCA_000434315.1	s__GCA_000434315.1	s__GCA_000434315.1:100139	100139	0.0526586	0.0369307	0.0295092	0.0172758	0.0139705	0.0112524	0.00999691	0.00955589	0.00901332	0.00863671	0.00807479	0.00726764	0.00693172	0.00626045	0.00612858	0.0060894	0.00592666	0.00566989	0.00563178	0.00552202	0.1988	0.262303	262
d__Bacteria	Firmicutes_A	c__Clostridia	o__Lachnospirales	f__Lachnospiraceae	g__CAG-56	s__GCA_900066065.1	s__GCA_900066065.1	s__GCA_900066065.1:100140	100140	0.00626629	0.00537546	0.0040064	0.00350339	0.00309843	0.00300941	0.00282621	0.00228636	0.00208036	0.00199496	0.00161343	0.00157468	0.00156624	0.00138513	0.00134633	0.00128589	0.00122919	0.00119071	0.00114078	0.00100304	0.0344473	0.0477827	5548
d__Bacteria	Firmicutes_A	c__Clostridia	o__Lachnospirales	f__Lachnospiraceae	g__	s__	f__Lachnospiraceae	f__Lachnospiraceae:100141	100141	0.00311325	0.00201341	0.0014464	0.00128375	0.00113088	0.00107947	0.00096784	0.00078575	0.0007656	0.0007427	0.00068738	0.00061754	0.00061107	0.00055842	0.00047973	0.00046987	0.0004546	0.0004492	0.00044021	0.00043058	0.013329	0.0185276	7608
d__Bacteria	Firmicutes_A	c__Clostridia	o__Lachnospirales	f__Lachnospiraceae	g__Blautia_A	s__Blautia_A massiliensis	s__Blautia_A massiliensis	s__Blautia_A massiliensis:100142	100142	0.00384387	0.00295241	0.00233835	0.00217778	0.00202282	0.00187612	0.00180037	0.00177826	0.00155483	0.00141256	0.00139494	0.00134684	0.00124599	0.00115072	0.0011181	0.00102979	0.00097055	0.0009496	0.00093114	0.00090451	0.0217574	0.0327995	4696
d__Bacteria	Firmicutes	c__Bacilli	o__Haloplasmatales	f__Turicibacteraceae	g__Turicibacter	s__Turicibacter sanguinis	s__Turicibacter sanguinis	s__Turicibacter sanguinis:100143	100143	0.080718	0.0275325	0.0199378	0.0142007	0.0134974	0.0122236	0.0109266	0.00942298	0.00926941	0.00844581	0.00785681	0.00749637	0.00700536	0.0068231	0.00657903	0.00647647	0.00628721	0.00611171	0.00603568	0.00593926	0.206175	0.272786	225
d__Bacteria	Bacteroidota	c__Bacteroidia	o__Bacteroidales	f__Barnesiellaceae	g__Barnesiella	s__Barnesiella intestinihominis	s__Barnesiella intestinihominis	s__Barnesiella intestinihominis:100144	100144	0.0120189	0.00997533	0.00794825	0.0073211	0.00470346	0.00432819	0.00417676	0.00322245	0.00316691	0.00269068	0.00250073	0.0023115	0.00225245	0.00183507	0.00154186	0.00140055	0.00132115	0.00122519	0.00115112	0.00109006	0.0595521	0.0761817	9185
d__Bacteria	Firmicutes_A	c__Clostridia	o__Lachnospirales	f__Lachnospiraceae	g__Dorea	s__Dorea formicigenerans	s__Dorea formicigenerans	s__Dorea formicigenerans:100146	100146	0.00894791	0.0042993	0.00391277	0.00320442	0.00285748	0.00209858	0.0019645	0.00187188	0.00176376	0.00160186	0.00149323	0.00146755	0.00128682	0.00120836	0.0012021	0.00106949	0.00104232	0.00100836	0.00099027	0.00096027	0.0325225	0.0442512	2989
d__Bacteria	Firmicutes_A	c__Clostridia	o__Lachnospirales	f__Lachnospiraceae	g__Tyzzerella	s__Tyzzerella nexilis	s__Tyzzerella nexilis	s__Tyzzerella nexilis:100148	100148	0.181307	0.107689	0.0706024	0.0514608	0.0330588	0.0281622	0.0235493	0.0210971	0.0190941	0.0167219	0.0163217	0.0153858	0.0144028	0.0137492	0.0131993	0.0128879	0.0121595	0.0116955	0.0116143	0.0112168	0.552743	0.685376	72
d__Bacteria	Firmicutes_A	c__Clostridia	o__Clostridiales	f__Clostridiaceae	g__Clostridium	s__Clostridium saudiense	s__Clostridium saudiense	s__Clostridium saudiense:100149	100149	0.044498	0.0278532	0.0160613	0.0135118	0.0116492	0.00822757	0.00766814	0.00584736	0.0057898	0.00508477	0.00493767	0.00436155	0.00421434	0.00412224	0.00389199	0.00371235	0.00356303	0.00345266	0.00340162	0.00332177	0.146191	0.18517	617
d__Bacteria	Firmicutes_A	c__Clostridia	o__Lachnospirales	f__Lachnospiraceae	g__CAG-45	s__GCA_000438375.1	s__GCA_000438375.1	s__GCA_000438375.1:100153	100153	0.0205409	0.0148515	0.0110047	0.00891006	0.00655289	0.00461572	0.00438277	0.0040345	0.00389694	0.00379358	0.00362334	0.00339925	0.00304486	0.0027696	0.00269269	0.00267455	0.00254378	0.00243578	0.00238891	0.00236511	0.0825836	0.110521	1272
d__Bacteria	Firmicutes_A	c__Clostridia	o__Lachnospirales	f__Lachnospiraceae	g__CAG-45	s__GCA_900066395.1	s__GCA_900066395.1	s__GCA_900066395.1:100154	100154	0.00646048	0.00601384	0.00336322	0.00282324	0.0025097	0.00209221	0.00193096	0.00184594	0.00156274	0.00155447	0.00148104	0.00146704	0.00140964	0.00130772	0.00128918	0.0011422	0.0011263	0.00112437	0.00108195	0.0010412	0.0301568	0.0426274	3474
d__Bacteria	Firmicutes_A	c__Clostridia	o__Lachnospirales	f__Lachnospiraceae	g__Sellimonas	s__Sellimonas intestinalis	s__Sellimonas intestinalis	s__Sellimonas intestinalis:100159	100159	0.127855	0.0584375	0.0469502	0.0369331	0.0210895	0.0194693	0.0170574	0.0167404	0.0145664	0.014282	0.013851	0.0130925	0.0128604	0.0121751	0.0118284	0.0113401	0.0107297	0.0106017	0.010373	0.00969594	0.373381	0.489929	127
d__Bacteria	Firmicutes_A	c__Clostridia	o__Lachnospirales	f__Lachnospiraceae	g__Eubacterium_G	s__GCA_000432355.1	s__GCA_000432355.1	s__GCA_000432355.1:100169	100169	0.0285969	0.0172419	0.0116378	0.0100412	0.00879151	0.00812031	0.00762045	0.0074331	0.0071042	0.00663248	0.00616901	0.00602896	0.00577821	0.00537803	0.00503932	0.00492751	0.00483023	0.00468771	0.00451752	0.00435068	0.11322	0.164927	488
d__Bacteria	Bacteroidota	c__Bacteroidia	o__Bacteroidales	f__Rikenellaceae	g__Alistipes_A	s__Alistipes_A sp1	s__Alistipes_A sp1	s__Alistipes_A sp1:100170	100170	0.0172195	0.00996053	0.00868261	0.00762909	0.00593648	0.00399632	0.0034247	0.00259835	0.00209949	0.00189773	0.00155165	0.00135961	0.00113728	0.0010545	0.00095758	0.00089308	0.00084947	0.00081367	0.00074542	0.00069725	0.0634448	0.0735043	3720
d__Bacteria	Firmicutes_A	c__Clostridia	o__Lachnospirales	f__Anaerotignaceae	g__Anaerotignum	s__Anaerotignum sp1	s__Anaerotignum sp1	s__Anaerotignum sp1:100177	100177	0.00873326	0.00680808	0.00634885	0.00538535	0.00420126	0.00330684	0.00261429	0.00257049	0.00220611	0.00192074	0.00177405	0.00162875	0.00154588	0.0014289	0.00130174	0.00127488	0.00121279	0.00116583	0.00110428	0.00107554	0.0440953	0.0576079	6059
d__Bacteria	Bacteroidota	c__Bacteroidia	o__Bacteroidales	f__Marinifilaceae	g__Butyricimonas	s__GCF_002161485.1	s__GCF_002161485.1	s__GCF_002161485.1:100183	100183	0.0406636	0.0179815	0.0158372	0.00882992	0.00772365	0.0045532	0.00370059	0.00352976	0.00333695	0.00310933	0.00231856	0.00205023	0.001869	0.00175315	0.00144435	0.0013134	0.00114758	0.00108349	0.0010569	0.00100711	0.109266	0.124309	2829
d__Bacteria	Firmicutes_A	c__Clostridia	o__Oscillospirales	f__Butyricicoccaceae	g__Agathobaculum	s__Agathobaculum sp1	s__Agathobaculum sp1	s__Agathobaculum sp1:100185	100185	0.00451468	0.00114652	0.00103388	0.00096301	0.0008451	0.00076955	0.00071479	0.00071192	0.00061988	0.00061125	0.00058994	0.00057472	0.00055881	0.00053765	0.00049126	0.0004852	0.00045809	0.00044727	0.00041915	0.00040786	0.0119306	0.0169005	9907
d__Bacteria	Firmicutes_A	c__Clostridia	o__Lachnospirales	f__Lachnospiraceae	g__	s__	f__Lachnospiraceae	f__Lachnospiraceae:100190	100190	0.00504291	0.00371935	0.00327163	0.00288675	0.00237059	0.00234335	0.00207949	0.00195623	0.00183827	0.00168544	0.00161046	0.00159153	0.00150029	0.00143541	0.00140788	0.00138342	0.00133689	0.00127011	0.00123814	0.00122526	0.027194	0.0411934	3528
d__Bacteria	Firmicutes_A	c__Clostridia	o__Lachnospirales	f__Lachnospiraceae	g__KLE1615	s__KLE1615 sp1	s__KLE1615 sp1	s__KLE1615 sp1:100193	100193	0.00372082	0.00249094	0.00133815	0.00118921	0.00068829	0.00064377	0.00061239	0.00053674	0.00051374	0.00045996	0.00044722	0.00043842	0.00043073	0.0004195	0.00039127	0.00038648	0.00037366	0.00037319	0.00036114	0.00035585	0.012194	0.0161715	7321
d__Bacteria	Firmicutes_A	c__Clostridia	o__Lachnospirales	f__Lachnospiraceae	g__	s__	f__Lachnospiraceae	f__Lachnospiraceae:100194	100194	0.0282778	0.00931727	0.00612141	0.00444849	0.00399912	0.00367088	0.00333193	0.00315979	0.00294538	0.00290579	0.00262975	0.00237021	0.00213764	0.00193493	0.0018798	0.00180399	0.00174167	0.0017116	0.00154717	0.00149107	0.0681778	0.0874257	1766
d__Bacteria	Firmicutes_A	c__Clostridia	o__Oscillospirales	f__Ruminococcaceae	g__Faecalibacterium	s__Faecalibacterium prausnitzii_E	s__Faecalibacterium prausnitzii_E	s__Faecalibacterium prausnitzii_E:100195	100195	0.0128741	0.00844235	0.00638542	0.00533332	0.00431236	0.00378206	0.00329669	0.00316824	0.00237128	0.00208263	0.00205281	0.00190851	0.00159044	0.00146509	0.00140734	0.00137824	0.00135057	0.00132742	0.00115697	0.00107207	0.0520485	0.066758	4840
d__Bacteria	Bacteroidota	c__Bacteroidia	o__Bacteroidales	f__Bacteroidaceae	g__Bacteroides	s__Bacteroides thetaiotaomicron	s__Bacteroides thetaiotaomicron	s__Bacteroides thetaiotaomicron:100196	100196	0.00999201	0.00605335	0.00406877	0.00357157	0.00283842	0.00249681	0.00220428	0.00187973	0.00178508	0.00140925	0.00138948	0.00122224	0.00111946	0.00104776	0.00101973	0.00091092	0.00084988	0.00075353	0.00074795	0.00074259	0.0362993	0.0461028	7072
d__Bacteria	Firmicutes	c__Bacilli	o__Lactobacillales	f__Streptococcaceae	g__Streptococcus	s__GCF_001813525.1	s__GCF_001813525.1	s__GCF_001813525.1:100199	100199	0.00410047	0.0026274	0.00248701	0.00195035	0.00186342	0.00168164	0.00154058	0.0014645	0.00137919	0.00126417	0.00122779	0.00117438	0.00115212	0.00113296	0.00111593	0.00108282	0.00106382	0.00105128	0.00103918	0.00102029	0.0203587	0.0314193	1978
d__Bacteria	Firmicutes_A	c__Clostridia	o__Lachnospirales	f__Lachnospiraceae	g__Blautia_A	s__	g__Blautia_A	g__Blautia_A:100200	100200	0.0405493	0.0201446	0.017652	0.011845	0.00842521	0.00837102	0.00787131	0.00750132	0.00747698	0.00720752	0.00657216	0.00608866	0.00596613	0.00584524	0.00568534	0.00563535	0.00554877	0.00547909	0.00544565	0.00540313	0.137044	0.194714	216
d__Bacteria	Firmicutes_A	c__Clostridia	o__Lachnospirales	f__Lachnospiraceae	g__Blautia_A	s__GCA_900066145.1	s__GCA_900066145.1	s__GCA_900066145.1:100201	100201	0.0170982	0.00732897	0.00703632	0.00596865	0.00578441	0.00508758	0.00423342	0.00379312	0.00353359	0.00294325	0.00283331	0.00266172	0.00242243	0.00240599	0.00238277	0.0022176	0.00216553	0.00210379	0.00207635	0.00203232	0.0628075	0.0861093	1143
d__Bacteria	Bacteroidota	c__Bacteroidia	o__Bacteroidales	f__Marinifilaceae	g__Butyricimonas	s__Butyricimonas virosa	s__Butyricimonas virosa	s__Butyricimonas virosa:100203	100203	0.0216042	0.0131136	0.00619355	0.00609119	0.00527904	0.00458443	0.00429669	0.00358255	0.00310027	0.0029124	0.00272886	0.00200971	0.00190276	0.00184856	0.00168708	0.00160231	0.00153088	0.00147275	0.00136034	0.00134737	0.0707579	0.0882485	3691
d__Bacteria	Firmicutes_A	c__Clostridia	o__Lachnospirales	f__Lachnospiraceae	g__Eubacterium_G	s__GCA_000435815.1	s__GCA_000435815.1	s__GCA_000435815.1:100204	100204	0.036513	0.0160869	0.011754	0.00909058	0.0082536	0.00718947	0.00686434	0.00642395	0.006121	0.00600543	0.00495551	0.00469755	0.00427725	0.00419993	0.00410942	0.0040283	0.00383783	0.00370728	0.00344956	0.00331095	0.114302	0.154876	670
d__Bacteria	Firmicutes_A	c__Clostridia	o__Lachnospirales	f__Lachnospiraceae	g__CAG-81	s__CAG-81 sp1	s__CAG-81 sp1	s__CAG-81 sp1:100205	100205	0.00253546	0.00202196	0.00194011	0.00169311	0.00152387	0.00133716	0.00113428	0.00103618	0.00093002	0.00091209	0.00081532	0.00074297	0.00073559	0.0006937	0.00066793	0.00064061	0.00062425	0.00059335	0.00057869	0.00057264	0.0150642	0.0217293	5781
d__Bacteria	Firmicutes_A	c__Clostridia	o__Lachnospirales	f__Lachnospiraceae	g__Dorea	s__GCA_900066555.1	s__GCA_900066555.1	s__GCA_900066555.1:100206	100206	0.0214371	0.009431	0.00712762	0.00612568	0.00390453	0.00324945	0.00274539	0.00266982	0.00250548	0.00234271	0.00211075	0.0018148	0.00164456	0.001568	0.00146912	0.00139092	0.00129346	0.0012692	0.00120845	0.00116094	0.0615388	0.076469	2513
d__Bacteria	Firmicutes_A	c__Clostridia	o__Lachnospirales	f__Lachnospiraceae	g__Eubacterium_G	s__Eubacterium_G ventriosum	s__Eubacterium_G ventriosum	s__Eubacterium_G ventriosum:100208	100208	0.0149114	0.00570444	0.00505961	0.00420179	0.00370034	0.00321916	0.00308788	0.00281757	0.00271936	0.0025985	0.00251822	0.00247389	0.00237045	0.00228959	0.00221487	0.00217011	0.00206956	0.0020421	0.00198685	0.00189354	0.0480201	0.0700493	1750
d__Bacteria	Firmicutes_A	c__Clostridia	o__Lachnospirales	f__Lachnospiraceae	g__Eubacterium_F	s__	g__Eubacterium_F	g__Eubacterium_F:100209	100209	0.00884441	0.00564598	0.00385492	0.00184007	0.00168639	0.0015693	0.00144498	0.00136445	0.00129974	0.00127194	0.00120158	0.00108698	0.00104423	0.00096653	0.00091286	0.00090237	0.00083313	0.0008057	0.00080233	0.0007746	0.0288222	0.0381525	6210
d__Bacteria	Firmicutes_A	c__Clostridia	o__Lachnospirales	f__Lachnospiraceae	g__Blautia_A	s__Blautia_A obeum	s__Blautia_A obeum	s__Blautia_A obeum:100212	100212	0.01457	0.00763192	0.00285879	0.00270079	0.00240101	0.00230065	0.00222256	0.00198555	0.00197433	0.00184707	0.00180463	0.00179213	0.0017026	0.00165591	0.00156334	0.00154452	0.00146936	0.00142369	0.00141074	0.00139148	0.0404927	0.0562511	2885
d__Bacteria	Firmicutes_C	c__Negativicutes	o__Veillonellales	f__Veillonellaceae	g__Veillonella	s__Veillonella dispar_A	s__Veillonella dispar_A	s__Veillonella dispar_A:100214	100214	0.151074	0.0225554	0.0190522	0.0161767	0.0143162	0.0134507	0.0132796	0.013129	0.0127827	0.0123359	0.0120455	0.0119903	0.0116784	0.0114424	0.0113079	0.0109941	0.0109392	0.0107461	0.0105907	0.0103878	0.288153	0.400275	125
d__Bacteria	Bacteroidota	c__Bacteroidia	o__Bacteroidales	f__Bacteroidaceae	g__Prevotella	s__Prevotella stercorea	s__Prevotella stercorea	s__Prevotella stercorea:100215	100215	0.0393592	0.0186293	0.0153227	0.0149854	0.0147943	0.0138126	0.0135461	0.0129779	0.0125757	0.0120439	0.0117938	0.0115591	0.0112426	0.011038	0.0108884	0.0108332	0.0106442	0.0104322	0.0103869	0.0101428	0.168047	0.277008	110
d__Bacteria	Firmicutes_A	c__Clostridia	o__Lachnospirales	f__Lachnospiraceae	g__CAG-65	s__CAG-65 sp3	s__CAG-65 sp3	s__CAG-65 sp3:100217	100217	0.00378635	0.00286938	0.00179628	0.00149055	0.00146191	0.00129014	0.0011858	0.00114483	0.00101727	0.00094407	0.00089241	0.00081009	0.00078223	0.00075658	0.00071612	0.00069235	0.00068475	0.00066164	0.00065598	0.00063125	0.0169866	0.02427	7629
d__Bacteria	Firmicutes_A	c__Clostridia	o__Lachnospirales	f__Lachnospiraceae	g__Coprococcus	s__Coprococcus eutactus_A	s__Coprococcus eutactus_A	s__Coprococcus eutactus_A:100231	100231	0.00875487	0.00560979	0.00517605	0.00471194	0.00331192	0.00310171	0.00267924	0.00255046	0.00239695	0.00233613	0.00227747	0.00199745	0.0019244	0.00184642	0.00171341	0.00167572	0.00155489	0.00151552	0.00143718	0.00142911	0.040629	0.0580006	3865
d__Bacteria	Firmicutes_A	c__Clostridia	o__Lachnospirales	f__Lachnospiraceae	g__CAG-81	s__GCA_900066785.1	s__GCA_900066785.1	s__GCA_900066785.1:100233	100233	0.0041258	0.00334574	0.00313522	0.0022818	0.0018406	0.00176265	0.00161564	0.00151309	0.00145921	0.00143747	0.00132856	0.00108232	0.00097511	0.00090358	0.00079599	0.00076418	0.00074328	0.00072694	0.00071457	0.00068389	0.0225172	0.0312357	4776
d__Bacteria	Firmicutes_A	c__Clostridia	o__Lachnospirales	f__Lachnospiraceae	g__Clostridium_M	s__GCA_000431375.1	s__GCA_000431375.1	s__GCA_000431375.1:100242	100242	0.00639085	0.00573656	0.00549929	0.00458658	0.00374341	0.00368302	0.00330849	0.00305715	0.00290685	0.00241214	0.0022294	0.00215044	0.00207772	0.00195672	0.00195486	0.00181994	0.00180414	0.00165691	0.00161106	0.00157577	0.0413243	0.0601613	2036
d__Bacteria	Bacteroidota	c__Bacteroidia	o__Bacteroidales	f__Bacteroidaceae	g__Bacteroides_B	s__Bacteroides_B massiliensis	s__Bacteroides_B massiliensis	s__Bacteroides_B massiliensis:100243	100243	0.0159615	0.0120093	0.00683557	0.00574645	0.00388877	0.00352228	0.00338707	0.00273635	0.00229342	0.00217934	0.00197102	0.00185035	0.00169731	0.00154132	0.00141596	0.00136758	0.00126535	0.0011517	0.00112451	0.00110024	0.05856	0.0730454	3659
d__Bacteria	Firmicutes	c__Bacilli	o__Erysipelotrichales	f__Erysipelatoclostridiaceae	g__Catenibacterium	s__GCA_000437715.1	s__GCA_000437715.1	s__GCA_000437715.1:100244	100244	0.0552843	0.035812	0.0263384	0.0103601	0.0100763	0.00815372	0.0076598	0.00719501	0.00670683	0.00634854	0.00613117	0.00600659	0.00570871	0.0055007	0.00523661	0.00519509	0.00493684	0.00485578	0.00479009	0.00470203	0.173935	0.226999	273
d__Bacteria	Firmicutes_A	c__Clostridia	o__Lachnospirales	f__Lachnospiraceae	g__Roseburia	s__	g__Roseburia	g__Roseburia:100245	100245	0.239134	0.0541749	0.0413991	0.037951	0.0345456	0.0328808	0.031934	0.0303937	0.0296694	0.0286561	0.0274288	0.0262981	0.0253318	0.0240257	0.0232392	0.023121	0.022716	0.0213583	0.0209944	0.0199443	0.560739	0.795197	40
d__Bacteria	Firmicutes_A	c__Clostridia	o__Lachnospirales	f__Lachnospiraceae	g__Ruminococcus_B	s__Ruminococcus_B faecis	s__Ruminococcus_B faecis	s__Ruminococcus_B faecis:100249	100249	0.00452464	0.00274666	0.00201358	0.00145247	0.00137631	0.00125756	0.00112534	0.00102735	0.00098757	0.00096642	0.00090006	0.00087845	0.00087017	0.000839	0.00080763	0.00079674	0.00076836	0.00075742	0.00075278	0.00073926	0.0174779	0.0255878	3092
d__Bacteria	Firmicutes_A	c__Clostridia	o__Lachnospirales	f__Lachnospiraceae	g__TF01-11	s__GCF_001414325.1	s__GCF_001414325.1	s__GCF_001414325.1:100250	100250	0.034616	0.0155429	0.0110721	0.00621813	0.0059244	0.00489417	0.00430396	0.00396729	0.0036593	0.00344589	0.00314572	0.00306305	0.00294462	0.00275951	0.00264432	0.00260504	0.00255711	0.00251608	0.00243773	0.00237617	0.0936442	0.120694	720
d__Bacteria	Firmicutes_A	c__Clostridia	o__Lachnospirales	f__Lachnospiraceae	g__Fusicatenibacter	s__Fusicatenibacter saccharivorans	s__Fusicatenibacter saccharivorans	s__Fusicatenibacter saccharivorans:100251	100251	0.00226748	0.00196037	0.00118475	0.00105745	0.00083232	0.00081387	0.00076814	0.00072425	0.00065752	0.00062548	0.00061023	0.00058214	0.0005428	0.0005253	0.00052107	0.00049663	0.00047088	0.00046633	0.00045865	0.00044619	0.0108916	0.0160119	9810
d__Bacteria	Firmicutes_A	c__Clostridia	o__Lachnospirales	f__Lachnospiraceae	g__Blautia_A	s__	g__Blautia_A	g__Blautia_A:100252	100252	0.0155227	0.00460547	0.00282446	0.00219224	0.00142698	0.00129254	0.00107778	0.00105689	0.00097882	0.00096569	0.0009307	0.00088909	0.00086614	0.0008402	0.00080496	0.00076204	0.00074621	0.00073186	0.00072686	0.00070421	0.0319436	0.0399458	2553
d__Bacteria	Firmicutes	c__Bacilli	o__Erysipelotrichales	f__Erysipelotrichaceae	g__Holdemanella	s__	g__Holdemanella	g__Holdemanella:100253	100253	0.0168506	0.00926991	0.00555624	0.00397419	0.00340505	0.00208768	0.00192239	0.00185285	0.00182828	0.00156467	0.00151285	0.00148299	0.00139285	0.00135418	0.00132469	0.00131314	0.00128757	0.00122892	0.00114911	0.00114454	0.0483119	0.0615027	1127
d__Bacteria	Bacteroidota	c__Bacteroidia	o__Bacteroidales	f__Marinifilaceae	g__Odoribacter	s__Odoribacter splanchnicus	s__Odoribacter splanchnicus	s__Odoribacter splanchnicus:100254	100254	0.0100294	0.00161907	0.00145233	0.00137322	0.00094822	0.00079955	0.00074828	0.00064238	0.00063382	0.00056619	0.00055362	0.00054281	0.00051096	0.00050913	0.00050763	0.00049643	0.00045723	0.0004419	0.00043489	0.00042345	0.0188125	0.0236905	9211
d__Bacteria	Firmicutes_A	c__Clostridia	o__Lachnospirales	f__Lachnospiraceae	g__CAG-81	s__GCA_900066055.1	s__GCA_900066055.1	s__GCA_900066055.1:100255	100255	0.0424291	0.0377433	0.0273	0.0226289	0.0155368	0.0137988	0.0130466	0.012609	0.0118625	0.0111027	0.0108819	0.0105882	0.0105533	0.00994839	0.00947546	0.00940044	0.00918875	0.00905251	0.00896287	0.00886145	0.208058	0.304971	193
d__Bacteria	Firmicutes_A	c__Clostridia	o__Lachnospirales	f__Lachnospiraceae	g__	s__	f__Lachnospiraceae	f__Lachnospiraceae:100259	100259	0.0068878	0.00264026	0.00243953	0.0019801	0.00178985	0.00144901	0.00133328	0.0011599	0.00113319	0.00102001	0.00097696	0.00087883	0.00086083	0.00084034	0.00078934	0.00074099	0.00072499	0.00071253	0.00067632	0.00065936	0.0218329	0.0296934	4133
d__Bacteria	Firmicutes_A	c__Clostridia	o__Lachnospirales	f__Lachnospiraceae	g__Eubacterium_E	s__Eubacterium_E hallii	s__Eubacterium_E hallii	s__Eubacterium_E hallii:100262	100262	0.0123019	0.00932613	0.00682159	0.00578466	0.00478482	0.0043077	0.0036081	0.00360075	0.00323752	0.00289195	0.00280702	0.00264509	0.00263915	0.00237101	0.00230791	0.00219965	0.00215534	0.00210263	0.00205977	0.00193231	0.0566651	0.0798849	2756
d__Bacteria	Firmicutes_A	c__Clostridia	o__Lachnospirales	f__Lachnospiraceae	g__Blautia_A	s__GCA_900066335.1	s__GCA_900066335.1	s__GCA_900066335.1:100263	100263	0.00839124	0.00231775	0.00163796	0.00130115	0.00125128	0.00115443	0.00103531	0.00098056	0.00093126	0.00086453	0.00081002	0.00078068	0.00076134	0.00072904	0.00072202	0.00070768	0.00068307	0.00066403	0.00064817	0.0006286	0.0198655	0.0270001	3642
d__Bacteria	Bacteroidota	c__Bacteroidia	o__Bacteroidales	f__Bacteroidaceae	g__Bacteroides	s__Bacteroides nordii	s__Bacteroides nordii	s__Bacteroides nordii:100265	100265	0.108238	0.0937206	0.0661411	0.0405699	0.037243	0.0331755	0.0311517	0.0293674	0.0256761	0.0239362	0.0230728	0.0217751	0.0197157	0.0195283	0.0188009	0.0180717	0.0175335	0.0172344	0.0164009	0.0159791	0.48922	0.677332	58
d__Bacteria	Firmicutes_A	c__Clostridia	o__Lachnospirales	f__Lachnospiraceae	g__Ruminococcus_B	s__GCA_900066545.1	s__GCA_900066545.1	s__GCA_900066545.1:100268	100268	0.0418893	0.0185418	0.0104654	0.00680775	0.00650273	0.00598361	0.00550823	0.00518729	0.00497466	0.00439095	0.00400269	0.00383381	0.00377744	0.00371296	0.00360242	0.00341991	0.0033131	0.00328228	0.0032393	0.00321261	0.110252	0.145648	587
d__Bacteria	Firmicutes_A	c__Clostridia	o__Lachnospirales	f__Lachnospiraceae	g__Roseburia	s__Roseburia inulinivorans	s__Roseburia inulinivorans	s__Roseburia inulinivorans:100271	100271	0.00385229	0.00311655	0.00279638	0.00272235	0.00234081	0.00229171	0.00212408	0.00199488	0.00192573	0.00188838	0.00183892	0.00167707	0.00156067	0.00153403	0.00150056	0.00145647	0.00143539	0.0013917	0.0013561	0.00133104	0.0250532	0.0401351	4046
d__Bacteria	Bacteroidota	c__Bacteroidia	o__Bacteroidales	f__Bacteroidaceae	g__Prevotella	s__GCA_000434515.1	s__GCA_000434515.1	s__GCA_000434515.1:100272	100272	0.0564029	0.0369885	0.0118829	0.0102212	0.00991042	0.00963092	0.00900935	0.00875123	0.00845921	0.00809631	0.00795438	0.00782707	0.00762484	0.00760526	0.0074194	0.0073245	0.00730829	0.00719609	0.00716366	0.00708594	0.169353	0.243862	149
d__Bacteria	Bacteroidota	c__Bacteroidia	o__Bacteroidales	f__Bacteroidaceae	g__Bacteroides_A	s__Bacteroides_A coprophilus	s__Bacteroides_A coprophilus	s__Bacteroides_A coprophilus:100273	100273	0.160719	0.145938	0.0758312	0.0646406	0.0564974	0.0393299	0.0378762	0.0369086	0.0337398	0.0318765	0.0301623	0.0297238	0.0286185	0.0273676	0.0267747	0.0261064	0.0241441	0.0226676	0.0219987	0.0198062	0.683357	0.940727	30
d__Bacteria	Firmicutes_A	c__Clostridia	o__Lachnospirales	f__Lachnospiraceae	g__Hungatella_A	s__	g__Hungatella_A	g__Hungatella_A:100278	100278	0.00526071	0.00363254	0.00334605	0.00273055	0.00227711	0.00191297	0.00166367	0.00157295	0.00136659	0.00111004	0.00097166	0.00091658	0.00084003	0.00082926	0.00079958	0.00074092	0.00073707	0.00072769	0.00068787	0.00067554	0.0248732	0.0327994	5070
d__Bacteria	Firmicutes_A	c__Clostridia	o__Lachnospirales	f__Lachnospiraceae	g__	s__	f__Lachnospiraceae	f__Lachnospiraceae:100280	100280	0.0404015	0.0180042	0.0159402	0.0128918	0.0127139	0.0109757	0.0106985	0.0101741	0.00998939	0.00993391	0.00975112	0.00960738	0.00940248	0.00914076	0.00890662	0.00885965	0.00866603	0.00861281	0.00847509	0.00838747	0.151723	0.241533	165
d__Bacteria	Firmicutes_A	c__Clostridia	o__Lachnospirales	f__Lachnospiraceae	g__TF01-11	s__GCA_000432755.1	s__GCA_000432755.1	s__GCA_000432755.1:100282	100282	0.0655378	0.0461679	0.0415725	0.0386366	0.0356389	0.0327304	0.030591	0.0286077	0.0271532	0.0251781	0.0243246	0.0220862	0.0204864	0.0193931	0.0192353	0.0181346	0.0171182	0.0164772	0.0156559	0.0151248	0.371814	0.559851	83
d__Bacteria	Firmicutes_A	c__Clostridia	o__4C28d-15	f__CAG-727	g__	s__	f__CAG-727	f__CAG-727:100344	100344	0.0163047	0.0104223	0.00864389	0.00689766	0.00467466	0.00324904	0.00265554	0.00216037	0.00197791	0.0018637	0.00141007	0.00121871	0.00083835	0.00075077	0.00071097	0.00068504	0.00061796	0.00055916	0.00054806	0.00052689	0.0588498	0.0667158	5051
d__Bacteria	Firmicutes_A	c__Clostridia	o__Oscillospirales	f__Ruminococcaceae	g__CAG-115	s__GCA_000436675.1	s__GCA_000436675.1	s__GCA_000436675.1:100362	100362	0.00729346	0.00522761	0.00371117	0.00318266	0.00271299	0.00255653	0.00249682	0.0021524	0.00194537	0.00179699	0.0017735	0.00169149	0.00166115	0.00155297	0.00147481	0.00141412	0.00133621	0.00125163	0.00119908	0.00118361	0.033076	0.0476146	5388
d__Bacteria	Firmicutes_A	c__Clostridia	o__Oscillospirales	f__Oscillospiraceae	g__CAG-170	s__	g__CAG-170	g__CAG-170:100369	100369	0.0131864	0.00379946	0.00283143	0.00224067	0.00166411	0.00158344	0.00112272	0.00111673	0.00096173	0.00078123	0.00068509	0.00065539	0.00059814	0.00057343	0.0005601	0.00055344	0.00053006	0.00050096	0.00049615	0.00047842	0.0292879	0.0349191	7045
d__Bacteria	Firmicutes_A	c__Clostridia	o__Oscillospirales	f__Oscillospiraceae	g__CAG-170	s__	g__CAG-170	g__CAG-170:100370	100370	0.00396246	0.00337608	0.00300234	0.002225	0.00207966	0.00175732	0.00163889	0.00155665	0.00148757	0.00137388	0.00131278	0.00122046	0.00120839	0.00108458	0.0010068	0.00098766	0.00091638	0.00089206	0.00085458	0.00076556	0.0224599	0.0327091	6821
d__Bacteria	Firmicutes_A	c__Clostridia	o__Lachnospirales	f__Lachnospiraceae	g__	s__	f__Lachnospiraceae	f__Lachnospiraceae:100404	100404	0.0125269	0.0114075	0.00770304	0.0073479	0.0059718	0.00419689	0.00316335	0.00260922	0.00222165	0.00214239	0.00210028	0.00182114	0.00163472	0.00162991	0.00145338	0.00136914	0.00133977	0.00131899	0.00123196	0.00120296	0.0592906	0.0743928	4350
d__Bacteria	Firmicutes_A	c__Clostridia	o__4C28d-15	f__CAG-727	g__	s__	f__CAG-727	f__CAG-727:100409	100409	0.0174085	0.00737207	0.00389908	0.00293626	0.00223079	0.00201964	0.00169703	0.00151341	0.0012525	0.0012388	0.00105316	0.00096655	0.00090039	0.0007705	0.00074663	0.0006811	0.00063588	0.00057647	0.00055973	0.00055539	0.0415681	0.0490139	4739
d__Bacteria	Proteobacteria	c__Gammaproteobacteria	o__Enterobacterales	f__Succinivibrionaceae	g__Succinivibrio	s__GCA_000431835.1	s__GCA_000431835.1	s__GCA_000431835.1:100412	100412	0.0692671	0.0589867	0.0351857	0.0271364	0.0254622	0.0223578	0.0193583	0.0189113	0.0186702	0.017212	0.0164921	0.01563	0.0143813	0.0131024	0.0124797	0.0115516	0.0111166	0.0108951	0.0107429	0.0102019	0.312548	0.439142	123
d__Bacteria	Firmicutes_A	c__Clostridia	o__4C28d-15	f__CAG-727	g__	s__	f__CAG-727	f__CAG-727:100429	100429	0.00629955	0.00372375	0.00232805	0.00145393	0.00108275	0.00103239	0.00092688	0.00089659	0.00086642	0.00082657	0.0007548	0.0007523	0.00074769	0.00071816	0.00071253	0.00068553	0.0006793	0.00067283	0.00066788	0.00066347	0.0194369	0.0264914	1884
d__Bacteria	Firmicutes	c__Bacilli	o__RFN20	f__CAG-288	g__CAG-345	s__	g__CAG-345	g__CAG-345:100431	100431	0.0194135	0.0122331	0.0117232	0.00899742	0.00620834	0.00500887	0.0047854	0.00450813	0.0039991	0.00345316	0.00291801	0.0026244	0.00250714	0.00235639	0.0021308	0.00194896	0.00184431	0.00175446	0.00167873	0.00160981	0.0803302	0.101703	2089
d__Bacteria	Bacteroidota	c__Bacteroidia	o__Flavobacteriales	f__	g__	s__	o__Flavobacteriales	o__Flavobacteriales:100451	100451	0.0676637	0.0360959	0.0318727	0.0151399	0.0130135	0.0114714	0.0111633	0.00938151	0.00751219	0.00702977	0.00565435	0.00550812	0.00520214	0.00499144	0.0045415	0.00414093	0.00396821	0.00360995	0.00342508	0.00325683	0.210344	0.254642	1477
d__Bacteria	Firmicutes_A	c__Clostridia	o__Oscillospirales	f__DTU089	g__	s__	f__DTU089	f__DTU089:100457	100457	0.0253108	0.0128568	0.00952298	0.00780354	0.00684717	0.00541954	0.00525564	0.00463721	0.00413973	0.00383347	0.00367519	0.00336146	0.00330425	0.0030993	0.00293346	0.00291369	0.00272095	0.00257413	0.00255642	0.00251772	0.0856269	0.115283	1155
d__Bacteria	Proteobacteria	c__Gammaproteobacteria	o__Betaproteobacteriales	f__Burkholderiaceae	g__	s__	f__Burkholderiaceae	f__Burkholderiaceae:100475	100475	0.119657	0.0588712	0.0466716	0.0423282	0.0411784	0.032609	0.0312872	0.028923	0.0256913	0.0236006	0.0234946	0.0231441	0.0224546	0.021764	0.0208984	0.0202238	0.0195645	0.0190495	0.0186134	0.0184561	0.450818	0.658481	55
d__Bacteria	Firmicutes_A	c__Clostridia	o__Lachnospirales	f__Lachnospiraceae	g__Butyrivibrio_A	s__GCA_000431815.1	s__GCA_000431815.1	s__GCA_000431815.1:100484	100484	0.0954037	0.0639135	0.0536098	0.0394735	0.0222673	0.0199314	0.0188751	0.0187339	0.0184308	0.0169104	0.0160765	0.0156076	0.0154382	0.0149057	0.0143554	0.0141131	0.0137864	0.013277	0.0127764	0.0127131	0.367549	0.510599	93
d__Bacteria	Elusimicrobiota	c__Elusimicrobia	o__Elusimicrobiales	f__Elusimicrobiaceae	g__UBA1436	s__	g__UBA1436	g__UBA1436:100519	100519	0.0595854	0.0536959	0.0465309	0.0446159	0.0407263	0.0339696	0.0322853	0.0315285	0.0281669	0.0262433	0.0245327	0.0230052	0.0222493	0.0215185	0.0204748	0.020133	0.0198011	0.019649	0.0193319	0.0188098	0.397348	0.606853	56
d__Bacteria	Firmicutes_A	c__Clostridia	o__Christensenellales	f__CAG-138	g__PeH17	s__PeH17 sp1	s__PeH17 sp1	s__PeH17 sp1:100530	100530	0.00949829	0.00692624	0.00460351	0.00342893	0.00284773	0.00225417	0.00182908	0.00156334	0.00153572	0.00144652	0.00138958	0.00119849	0.00117302	0.00100644	0.00097519	0.00095801	0.00084679	0.00076987	0.00066636	0.00064959	0.0359335	0.0455668	4865
d__Bacteria	Firmicutes_A	c__Clostridia	o__Lachnospirales	f__Lachnospiraceae	g__CAG-510	s__GCA_000434615.1	s__GCA_000434615.1	s__GCA_000434615.1:100532	100532	0.0692681	0.0324069	0.0274493	0.0260284	0.0220927	0.0214397	0.0189123	0.0172327	0.015773	0.0155126	0.0152783	0.0144363	0.014071	0.0140034	0.0135678	0.0130793	0.0127743	0.0126417	0.0123814	0.0121892	0.266116	0.400538	112
d__Bacteria	Bacteroidota	c__Bacteroidia	o__Bacteroidales	f__Bacteroidaceae	g__Prevotella	s__	g__Prevotella	g__Prevotella:100534	100534	0.0541646	0.026321	0.0217539	0.0182398	0.0173768	0.0166884	0.01634	0.0161234	0.0155648	0.0151708	0.014746	0.0146765	0.0145368	0.0144084	0.0140341	0.0139753	0.0137873	0.0137621	0.0136898	0.0136033	0.217743	0.358963	77
d__Bacteria	Firmicutes_A	c__Clostridia	o__Oscillospirales	f__Ruminococcaceae	g__	s__	f__Ruminococcaceae	f__Ruminococcaceae:100537	100537	0.006046	0.00399466	0.0037649	0.00346484	0.00319349	0.00256881	0.00219332	0.00211678	0.00193659	0.00157091	0.00155235	0.00142798	0.0014084	0.00130477	0.00111977	0.00108062	0.00101115	0.00098865	0.00097578	0.00094279	0.0308503	0.0426626	2147
d__Bacteria	Verrucomicrobiota	c__Lentisphaeria	o__UBA1784	f__	g__	s__	o__UBA1784	o__UBA1784:100538	100538	0.172831	0.03103	0.0280914	0.0274744	0.0228956	0.0213203	0.0207751	0.0176252	0.0162983	0.0151804	0.014176	0.0138941	0.0134401	0.0131578	0.0130504	0.0128255	0.0119892	0.011868	0.0116277	0.0115198	0.373522	0.501071	109
d__Bacteria	Firmicutes_A	c__Clostridia	o__Lachnospirales	f__Lachnospiraceae	g__Oribacterium	s__	g__Oribacterium	g__Oribacterium:100539	100539	0.150289	0.0994051	0.0556808	0.0320233	0.0283428	0.0248708	0.0232382	0.0211062	0.0204508	0.019766	0.0191698	0.0183576	0.0173626	0.0170973	0.0163621	0.0160441	0.0158951	0.0154834	0.0151753	0.015107	0.475173	0.641227	57
d__Bacteria	Firmicutes_A	c__Clostridia	o__Oscillospirales	f__Ruminococcaceae	g__CAG-115	s__	g__CAG-115	g__CAG-115:100561	100561	0.222863	0.0506308	0.0371604	0.0345014	0.0317922	0.0305894	0.0294439	0.0267595	0.0263007	0.0256245	0.0234922	0.0229495	0.0213415	0.0208911	0.0198602	0.0192128	0.0182979	0.0181872	0.0175199	0.017318	0.515665	0.714736	52
d__Bacteria	Firmicutes_A	c__Clostridia	o__Lachnospirales	f__Lachnospiraceae	g__Lachnospira	s__GCA_000437735.1	s__GCA_000437735.1	s__GCA_000437735.1:100562	100562	0.0039223	0.00317589	0.00269754	0.00207182	0.00186418	0.00179827	0.00172748	0.00168509	0.00163799	0.00158504	0.00152499	0.00149004	0.00145081	0.00142834	0.00136297	0.00134778	0.00121946	0.00117261	0.00114002	0.00111172	0.0221656	0.0354143	3562
d__Bacteria	Verrucomicrobiota	c__Lentisphaeria	o__UBA1784	f__	g__	s__	o__UBA1784	o__UBA1784:100575	100575	0.0252944	0.0136355	0.0109998	0.00848344	0.00821118	0.0065996	0.00575138	0.00522592	0.00451523	0.00441437	0.00433926	0.0038062	0.00357335	0.00346568	0.0032523	0.00314812	0.00234736	0.0023334	0.0022124	0.00208001	0.0931309	0.123689	3058
d__Bacteria	Firmicutes_A	c__Clostridia	o__Lachnospirales	f__Lachnospiraceae	g__CAG-791	s__GCA_000431495.1	s__GCA_000431495.1	s__GCA_000431495.1:100600	100600	0.0896534	0.0334509	0.0283656	0.0259337	0.0244327	0.0232276	0.0226007	0.0215718	0.0201721	0.0197262	0.0190996	0.0186401	0.0184289	0.018156	0.0177989	0.0173194	0.0167804	0.016471	0.0160681	0.0158331	0.309135	0.48373	72
d__Bacteria	Actinobacteriota	c__Coriobacteriia	o__Coriobacteriales	f__Eggerthellaceae	g__CAG-1427	s__	g__CAG-1427	g__CAG-1427:100602	100602	0.099629	0.0292296	0.0252469	0.0227814	0.0218821	0.0209685	0.0204542	0.019751	0.0196331	0.0189981	0.0188877	0.0178043	0.0175531	0.017148	0.0165239	0.0163096	0.0160642	0.0159318	0.0157851	0.0154227	0.298574	0.466004	84
d__Bacteria	Bacteroidota	c__Bacteroidia	o__Bacteroidales	f__UBA932	g__RC9	s__GCA_000433355.1	s__GCA_000433355.1	s__GCA_000433355.1:100606	100606	0.0256272	0.00824373	0.00410234	0.00289178	0.00241679	0.00185034	0.00172068	0.00170131	0.00163872	0.00160291	0.00158203	0.00155893	0.00153663	0.00151136	0.001496	0.00149102	0.00146041	0.00145645	0.00145466	0.00143998	0.0517958	0.0667833	1029
d__Bacteria	Bacteroidota	c__Bacteroidia	o__Bacteroidales	f__Bacteroidaceae	g__Prevotella	s__	g__Prevotella	g__Prevotella:100631	100631	0.0883608	0.0467133	0.0444497	0.0412908	0.0356213	0.0293718	0.028775	0.0261164	0.0243338	0.0231375	0.0227053	0.0216173	0.0209959	0.0207742	0.0200873	0.0197015	0.0194652	0.0190946	0.0185362	0.0183761	0.388171	0.589524	55
d__Bacteria	Firmicutes_A	c__Clostridia	o__Oscillospirales	f__Ruminococcaceae	g__Faecalibacterium	s__	g__Faecalibacterium	g__Faecalibacterium:100636	100636	0.158426	0.0337518	0.0321131	0.0302912	0.0295767	0.0274672	0.0267088	0.0261546	0.0248558	0.0242113	0.0232357	0.0231326	0.0222406	0.0220053	0.0214613	0.0211366	0.0209666	0.0202122	0.0195969	0.0191714	0.413557	0.626716	55
d__Bacteria	Bacteroidota	c__Bacteroidia	o__Bacteroidales	f__Bacteroidaceae	g__Prevotella	s__	g__Prevotella	g__Prevotella:100644	100644	0.0378574	0.0263406	0.00895836	0.00835446	0.00783142	0.00760017	0.0072736	0.00712854	0.00687701	0.00678463	0.00653217	0.00650866	0.00633321	0.00621844	0.00614267	0.00609786	0.00609159	0.00604655	0.0060068	0.00598654	0.125006	0.186971	177
d__Bacteria	Firmicutes_A	c__Clostridia	o__Oscillospirales	f__DTU089	g__Eubacterium_R	s__Eubacterium_R sp2	s__Eubacterium_R sp2	s__Eubacterium_R sp2:100646	100646	0.010729	0.00721886	0.00414144	0.00366421	0.00257906	0.00157987	0.00147682	0.00108279	0.00101266	0.00087478	0.00086733	0.00084777	0.00081606	0.00080252	0.00079775	0.00078474	0.00077366	0.00076931	0.0007459	0.00073638	0.0343595	0.0423009	2055
d__Bacteria	Firmicutes_A	c__Clostridia	o__Oscillospirales	f__Oscillospiraceae	g__CAG-170	s__	g__CAG-170	g__CAG-170:100651	100651	0.00155363	0.00127205	0.00092481	0.00076443	0.00068857	0.00067712	0.00061078	0.00054254	0.00052705	0.00050057	0.00048914	0.00047794	0.00046276	0.0004445	0.00043622	0.00042449	0.00041088	0.00038982	0.00036796	0.0003477	0.00806155	0.012313	8050
d__Bacteria	Bacteroidota	c__Bacteroidia	o__Bacteroidales	f__Coprobacteraceae	g__Coprobacter	s__GCA_000434215.1	s__GCA_000434215.1	s__GCA_000434215.1:100653	100653	0.0379186	0.0211635	0.0151963	0.0142334	0.0103826	0.0075573	0.00657336	0.0044075	0.00332049	0.00278424	0.00240531	0.00168751	0.00114338	0.00090619	0.00089815	0.00084583	0.00075451	0.00073755	0.00067286	0.00064422	0.123537	0.134233	3186
d__Bacteria	Bacteroidota	c__Bacteroidia	o__Bacteroidales	f__Muribaculaceae	g__UBA7173	s__	g__UBA7173	g__UBA7173:100667	100667	0.0123909	0.00572964	0.0025667	0.00170592	0.00157786	0.0015681	0.0015096	0.00143977	0.00140797	0.0013803	0.00132722	0.00130586	0.00123714	0.00122663	0.00120181	0.00118973	0.00118496	0.00117208	0.00116307	0.00115069	0.0312767	0.0434359	951
d__Bacteria	Firmicutes_A	c__Clostridia	o__Peptostreptococcales	f__Anaerovoracaceae	g__CAG-145	s__	g__CAG-145	g__CAG-145:100668	100668	0.00475699	0.00104702	0.00097884	0.00054795	0.0004007	0.00036329	0.00035558	0.00035099	0.00033661	0.00032664	0.00032406	0.00030498	0.00029124	0.00028594	0.00026942	0.00026501	0.00025781	0.00025105	0.00024416	0.00023876	0.0094646	0.012197	6684
d__Bacteria	Firmicutes_A	c__Clostridia	o__Oscillospirales	f__DTU089	g__CAG-488	s__GCA_000434055.1	s__GCA_000434055.1	s__GCA_000434055.1:100669	100669	0.060719	0.0438376	0.034725	0.0279709	0.0267427	0.025194	0.0240432	0.0234162	0.0211816	0.0208551	0.0205062	0.0196695	0.019127	0.0186394	0.0178781	0.0173631	0.016353	0.0161953	0.0154522	0.0145859	0.308685	0.484455	90
d__Bacteria	Bacteroidota	c__Bacteroidia	o__Bacteroidales	f__UBA932	g__RC9	s__GCA_000431015.1	s__GCA_000431015.1	s__GCA_000431015.1:100672	100672	0.258164	0.0601111	0.0485837	0.043182	0.0415703	0.0391867	0.0355524	0.0346636	0.0328449	0.0323193	0.0314581	0.029178	0.028645	0.0276911	0.0246592	0.0243257	0.0215922	0.0210036	0.0205524	0.0197449	0.626178	0.875029	35
d__Bacteria	Firmicutes_A	c__Clostridia	o__Lachnospirales	f__Lachnospiraceae	g__CAG-590	s__GCA_000431135.1	s__GCA_000431135.1	s__GCA_000431135.1:100690	100690	0.187492	0.0824361	0.0614297	0.0445161	0.0390011	0.0321992	0.0291916	0.0256203	0.0251864	0.021868	0.0213288	0.020396	0.0191368	0.0181541	0.0172339	0.0165483	0.0160926	0.0155552	0.0151563	0.014572	0.54894	0.723114	56
d__Bacteria	Bacteroidota	c__Bacteroidia	o__Bacteroidales	f__Bacteroidaceae	g__Prevotella	s__GCA_000436035.1	s__GCA_000436035.1	s__GCA_000436035.1:100695	100695	0.0725305	0.0147187	0.0141424	0.0126374	0.0124229	0.0119	0.0115837	0.011489	0.0111787	0.0109876	0.0108382	0.0106927	0.0105657	0.0105031	0.0104786	0.0103904	0.0102931	0.0100688	0.00998929	0.00995141	0.183591	0.287362	108
d__Bacteria	Bacteroidota	c__Bacteroidia	o__Bacteroidales	f__Tannerellaceae	g__Parabacteroides	s__	g__Parabacteroides	g__Parabacteroides:100696	100696	0.101223	0.053588	0.0473192	0.0436123	0.0412109	0.0396878	0.037842	0.0343437	0.0322926	0.0295494	0.0261234	0.025198	0.022753	0.02244	0.0208927	0.0201986	0.0201709	0.0197439	0.0194057	0.0191421	0.460668	0.676737	54
d__Bacteria	Bacteroidota	c__Bacteroidia	o__Bacteroidales	f__Bacteroidaceae	g__Paraprevotella	s__	g__Paraprevotella	g__Paraprevotella:100700	100700	0.167794	0.053215	0.0281238	0.0269599	0.0257099	0.0247948	0.0244501	0.0238274	0.0232056	0.0228953	0.0226308	0.0224636	0.0219879	0.0218475	0.0214224	0.0213211	0.0212684	0.0209141	0.0208469	0.0207093	0.420976	0.636388	42
d__Bacteria	Bacteroidota	c__Bacteroidia	o__Bacteroidales	f__Bacteroidaceae	g__Prevotella	s__	g__Prevotella	g__Prevotella:100701	100701	0.0650461	0.0473978	0.0395288	0.0354192	0.0331463	0.0300103	0.0281511	0.0272563	0.026897	0.0259256	0.0246332	0.024006	0.023696	0.0234873	0.0230539	0.0225619	0.0216576	0.0214528	0.0210146	0.0209056	0.358778	0.585247	49
d__Bacteria	Bacteroidota	c__Bacteroidia	o__Bacteroidales	f__Bacteroidaceae	g__Prevotella	s__	g__Prevotella	g__Prevotella:100707	100707	0.125424	0.0324641	0.0298214	0.0256193	0.0232313	0.0229986	0.0212885	0.0200314	0.0195205	0.0193062	0.0188822	0.0186525	0.0180233	0.017802	0.0174078	0.0171112	0.0168095	0.0166391	0.0164755	0.0161842	0.339705	0.513693	63
d__Bacteria	Firmicutes_A	c__Clostridia	o__Oscillospirales	f__Oscillospiraceae	g__	s__	f__Oscillospiraceae	f__Oscillospiraceae:100715	100715	0.118055	0.0428998	0.0380912	0.0304572	0.0254344	0.0240372	0.0221816	0.021021	0.0202539	0.0196634	0.0186316	0.0181997	0.0180098	0.0174332	0.0169812	0.0166706	0.0164404	0.0163599	0.0159259	0.0154432	0.362095	0.532191	75
d__Bacteria	Firmicutes_A	c__Clostridia	o__Oscillospirales	f__DTU089	g__CAG-177	s__	g__CAG-177	g__CAG-177:100723	100723	0.0143913	0.0106891	0.00723492	0.00520536	0.00467712	0.00404397	0.00343461	0.00336659	0.00312713	0.00286339	0.00244398	0.00213257	0.00211344	0.00199112	0.00175808	0.00173413	0.00167461	0.00157477	0.00152571	0.0015183	0.0590335	0.0775003	4579
d__Bacteria	Firmicutes_C	c__Negativicutes	o__Veillonellales	f__Dialisteraceae	g__Dialister	s__Dialister sp1	s__Dialister sp1	s__Dialister sp1:100725	100725	0.0817963	0.0312861	0.0242857	0.0192115	0.0160972	0.0144385	0.0140932	0.0136352	0.0132288	0.0129872	0.0125318	0.0123922	0.0122583	0.0117777	0.0116257	0.0110968	0.0108683	0.0107837	0.0104387	0.0104047	0.24106	0.355238	161
d__Bacteria	Firmicutes_A	c__Clostridia	o__Christensenellales	f__CAG-138	g__Phil1	s__GCA_001940855.1	s__GCA_001940855.1	s__GCA_001940855.1:100730	100730	0.017251	0.014544	0.0107531	0.00744021	0.00595535	0.00400619	0.00326246	0.00290806	0.0025563	0.0024529	0.00194675	0.00185279	0.00176627	0.00173323	0.00163839	0.00159204	0.00147958	0.00129948	0.00125213	0.00123528	0.0711295	0.0869255	3752
d__Bacteria	Firmicutes_A	c__Clostridia	o__4C28d-15	f__CAG-727	g__UBA10281	s__	g__UBA10281	g__UBA10281:100734	100734	0.0216602	0.00846634	0.00331355	0.00284492	0.00263536	0.00238607	0.00218591	0.00198774	0.00189988	0.00154685	0.00137834	0.00116387	0.00108725	0.00102417	0.0010081	0.00096754	0.00090754	0.00088564	0.00084963	0.00083315	0.0489268	0.059032	1832
d__Bacteria	Firmicutes_A	c__Clostridia	o__Oscillospirales	f__Oscillospiraceae	g__CAG-170	s__	g__CAG-170	g__CAG-170:100741	100741	0.15353	0.0573599	0.0431107	0.0362168	0.0347076	0.0346407	0.0329791	0.0325467	0.0310607	0.0297424	0.0271732	0.026788	0.0263705	0.024695	0.024052	0.0232224	0.02268	0.0220292	0.0213779	0.0196328	0.485895	0.723916	47
d__Bacteria	Firmicutes_A	c__Clostridia	o__Oscillospirales	f__Oscillospiraceae	g__CAG-110	s__GCA_000434635.1	s__GCA_000434635.1	s__GCA_000434635.1:100743	100743	0.0072941	0.00596967	0.00578447	0.00469376	0.00367842	0.00351345	0.00287684	0.00247219	0.00219423	0.00189321	0.00186506	0.00168869	0.0016344	0.0015823	0.00154359	0.0013809	0.00130165	0.00119427	0.00116252	0.00105543	0.0403703	0.0547791	6407
d__Bacteria	Firmicutes	c__Bacilli	o__Erysipelotrichales	f__Erysipelotrichaceae	g__	s__	f__Erysipelotrichaceae	f__Erysipelotrichaceae:100773	100773	0.134127	0.099491	0.0337495	0.0169464	0.0130909	0.012368	0.0106333	0.0102144	0.0100529	0.00960603	0.00930435	0.00892923	0.00880414	0.00850266	0.00829072	0.00809401	0.00800546	0.00791708	0.00783894	0.00768474	0.35028	0.433651	161
d__Bacteria	Firmicutes_A	c__Clostridia	o__4C28d-15	f__CAG-727	g__UBA10281	s__GCA_000437515.1	s__GCA_000437515.1	s__GCA_000437515.1:100836	100836	0.0811238	0.0586783	0.022868	0.0213529	0.0176539	0.0168509	0.0165679	0.0161113	0.015511	0.0148358	0.0142087	0.0140052	0.0139651	0.0136302	0.0132614	0.0128324	0.0126487	0.0124425	0.0121423	0.0120971	0.281554	0.412787	90
d__Bacteria	Firmicutes_A	c__Clostridia	o__Clostridiales	f__Clostridiaceae	g__Clostridium	s__	g__Clostridium	g__Clostridium:100839	100839	0.034715	0.00953691	0.00848148	0.00745893	0.00691198	0.00623034	0.00606302	0.00591134	0.00548129	0.0050744	0.00481435	0.00465317	0.00442128	0.00435317	0.00408532	0.00395217	0.00386699	0.00377333	0.00373902	0.00369137	0.0958647	0.137215	698
d__Bacteria	Firmicutes_A	c__Clostridia	o__Christensenellales	f__CAG-138	g__CAG-1024	s__GCA_000432015.1	s__GCA_000432015.1	s__GCA_000432015.1:100875	100875	0.0794883	0.0613135	0.0438073	0.042856	0.0407991	0.0374204	0.0349076	0.0312114	0.0309275	0.0294375	0.0288283	0.0278289	0.0271753	0.0270046	0.0255075	0.0254797	0.0253523	0.0245721	0.0239442	0.0231527	0.432169	0.691014	43
d__Bacteria	Firmicutes_A	c__Clostridia	o__Oscillospirales	f__Oscillospiraceae	g__CAG-83	s__	g__CAG-83	g__CAG-83:100877	100877	0.00734612	0.00356933	0.00237033	0.00206879	0.00190632	0.00146163	0.00134822	0.00111752	0.00106021	0.00098215	0.00096617	0.00090024	0.00084002	0.00079478	0.00077981	0.00075879	0.00073941	0.00072932	0.00072193	0.0007075	0.0232306	0.0311686	1927
d__Bacteria	Firmicutes_A	c__Clostridia	o__Oscillospirales	f__Oscillospiraceae	g__CAG-103	s__	g__CAG-103	g__CAG-103:100884	100884	0.268613	0.0663613	0.0545767	0.0473783	0.0385293	0.0322084	0.0286956	0.0276202	0.026743	0.0236072	0.0228435	0.0213499	0.0208925	0.0165002	0.0160856	0.0152478	0.0151484	0.0144724	0.0135644	0.0126589	0.614333	0.783096	53
d__Bacteria	Firmicutes_A	c__Clostridia	o__4C28d-15	f__CAG-314	g__CAG-314	s__GCA_000437915.1	s__GCA_000437915.1	s__GCA_000437915.1:100933	100933	0.0443926	0.00786027	0.00581952	0.00478416	0.00472854	0.00420369	0.00382109	0.00337416	0.00282005	0.00256635	0.00230828	0.00223189	0.00219455	0.00201475	0.00187287	0.00181251	0.00175935	0.00173658	0.00168784	0.00165645	0.0843704	0.103645	2434
d__Bacteria	Firmicutes_A	c__Clostridia	o__Oscillospirales	f__Ruminococcaceae	g__Ruminococcus_C	s__GCA_000980705.1	s__GCA_000980705.1	s__GCA_000980705.1:101021	101021	0.0308451	0.0216033	0.0108562	0.00708261	0.00424733	0.00342174	0.0029345	0.00258526	0.00254129	0.00234516	0.00227032	0.00202604	0.0018417	0.00180414	0.00168659	0.0015008	0.00135607	0.00130067	0.00128137	0.00119621	0.0884625	0.104726	1720
d__Bacteria	Firmicutes_A	c__Clostridia	o__Oscillospirales	f__DTU089	g__CAG-217	s__CAG-217 sp1	s__CAG-217 sp1	s__CAG-217 sp1:101029	101029	0.00956072	0.00654612	0.00609449	0.00608453	0.0034027	0.002377	0.0021265	0.0018308	0.00169745	0.00122889	0.00116904	0.00094507	0.00089293	0.00084117	0.00074608	0.00071442	0.00070863	0.00068459	0.0006671	0.00065721	0.0409492	0.0489754	3906
d__Bacteria	Firmicutes_A	c__Clostridia	o__Oscillospirales	f__Ruminococcaceae	g__Negativibacillus	s__GCA_000435195.1	s__GCA_000435195.1	s__GCA_000435195.1:101057	101057	0.0434506	0.00816029	0.007862	0.00637419	0.00603044	0.00567912	0.00524286	0.00508505	0.00504564	0.00492735	0.00426349	0.00397977	0.00392998	0.00365042	0.00351656	0.00328834	0.00316267	0.00312955	0.00300976	0.00298703	0.0978575	0.132775	1023
d__Bacteria	Firmicutes_C	c__Negativicutes	o__Veillonellales	f__Dialisteraceae	g__Dialister	s__GCA_000435155.1	s__GCA_000435155.1	s__GCA_000435155.1:101060	101060	0.144758	0.131754	0.0984554	0.0525266	0.0469757	0.0390148	0.0345594	0.0330193	0.0308245	0.0289594	0.0271212	0.0265348	0.0245749	0.0229758	0.0224548	0.0208738	0.0200456	0.0190806	0.0185689	0.0175429	0.640847	0.860621	43
d__Bacteria	Bacteroidota	c__Bacteroidia	o__Bacteroidales	f__UBA932	g__RC9	s__GCA_000434935.1	s__GCA_000434935.1	s__GCA_000434935.1:101085	101085	0.0456831	0.0388046	0.033496	0.0330876	0.029224	0.0268655	0.0264655	0.0257501	0.0247517	0.0246484	0.0239795	0.0238575	0.0233033	0.0232631	0.0225681	0.0223859	0.0220141	0.0217621	0.021575	0.0212799	0.308776	0.534765	49
d__Bacteria	Bacteroidota	c__Bacteroidia	o__Bacteroidales	f__Bacteroidaceae	g__Prevotella	s__Prevotella sp17	s__Prevotella sp17	s__Prevotella sp17:101097	101097	0.172601	0.0785746	0.0499141	0.0434949	0.0281078	0.027211	0.0244081	0.0237001	0.0230927	0.0226854	0.0222064	0.021792	0.0217546	0.0212793	0.0206541	0.0205111	0.020323	0.0199171	0.0195116	0.0189273	0.493789	0.700666	44
d__Bacteria	Firmicutes_A	c__Clostridia	o__Oscillospirales	f__Butyricicoccaceae	g__UBA4224	s__	g__UBA4224	g__UBA4224:101120	101120	0.0377858	0.0258188	0.0220057	0.0179664	0.0126321	0.0116209	0.0105456	0.010026	0.00849358	0.00805827	0.00769276	0.00689575	0.00655477	0.00651037	0.006269	0.00614059	0.00601608	0.00568306	0.00537631	0.00526801	0.164953	0.22736	342
d__Bacteria	Firmicutes_A	c__Clostridia	o__Oscillospirales	f__Oscillospiraceae	g__CAG-103	s__	g__CAG-103	g__CAG-103:101136	101136	0.00906031	0.00749025	0.00469014	0.00260551	0.00230632	0.00222534	0.00194773	0.00178999	0.00161112	0.00149087	0.00127147	0.00120001	0.0010553	0.00096133	0.00093096	0.00090732	0.00085826	0.00082599	0.00077783	0.00070864	0.0352176	0.0447147	4469
d__Bacteria	Firmicutes_A	c__Clostridia	o__Oscillospirales	f__Ruminococcaceae	g__Ruminococcus_C	s__GCA_000433635.1	s__GCA_000433635.1	s__GCA_000433635.1:101151	101151	0.0256322	0.013549	0.01269	0.010247	0.00738338	0.00615569	0.00527718	0.00443134	0.00411904	0.00352864	0.00299825	0.00256519	0.00223332	0.00187161	0.00177867	0.00168916	0.00168246	0.00160038	0.0014399	0.00129917	0.0930136	0.112172	3108
d__Bacteria	Firmicutes_A	c__Clostridia	o__Christensenellales	f__CAG-74	g__	s__	f__CAG-74	f__CAG-74:101156	101156	0.059574	0.0500931	0.0447567	0.040419	0.0355412	0.0290557	0.0251916	0.0215465	0.0202248	0.019548	0.0189973	0.0182112	0.0179144	0.0172324	0.0166358	0.0164215	0.0159618	0.0152606	0.0149214	0.0146679	0.345951	0.512175	82
d__Bacteria	Firmicutes_A	c__Clostridia	o__Oscillospirales	f__Ruminococcaceae	g__Subdoligranulum	s__	g__Subdoligranulum	g__Subdoligranulum:101157	101157	0.00955722	0.00662855	0.00616148	0.00521116	0.00273421	0.00178361	0.00164701	0.00155359	0.00152979	0.00145798	0.00139176	0.00134503	0.00132133	0.00124099	0.00115188	0.00100411	0.00092197	0.00086419	0.00083923	0.00082009	0.0382646	0.0491652	5576
d__Bacteria	Firmicutes_A	c__Clostridia	o__Lachnospirales	f__CAG-274	g__CAG-274	s__GCA_000432155.1	s__GCA_000432155.1	s__GCA_000432155.1:101160	101160	0.0430631	0.0260736	0.0179414	0.0172223	0.0160547	0.0143067	0.0139381	0.0133949	0.0130381	0.0120958	0.010951	0.0103499	0.0101174	0.0097995	0.00917851	0.00849971	0.00798104	0.00748856	0.00723177	0.00698449	0.187129	0.275711	257
d__Bacteria	Actinobacteriota	c__Coriobacteriia	o__Coriobacteriales	f__Eggerthellaceae	g__CAG-1427	s__GCA_000434775.1	s__GCA_000434775.1	s__GCA_000434775.1:101167	101167	0.0347196	0.0242986	0.0199552	0.016392	0.0156337	0.013177	0.0123789	0.0120275	0.0111789	0.0111129	0.0104765	0.0100175	0.00978118	0.00904447	0.00878044	0.00851297	0.00839918	0.0082171	0.00805873	0.00795438	0.170874	0.260117	221
d__Bacteria	Actinobacteriota	c__Coriobacteriia	o__Coriobacteriales	f__Eggerthellaceae	g__CAG-1427	s__GCA_000436075.1	s__GCA_000436075.1	s__GCA_000436075.1:101168	101168	0.00304226	0.00232091	0.00194806	0.00175858	0.00162701	0.00127573	0.00121457	0.00109704	0.00101454	0.00099625	0.00092637	0.00086095	0.00085505	0.00080367	0.00077177	0.00070667	0.00069297	0.000662	0.00066101	0.00063652	0.0162949	0.0238719	4937
d__Bacteria	Firmicutes_A	c__Clostridia	o__Lachnospirales	f__Lachnospiraceae	g__Agathobacter	s__	g__Agathobacter	g__Agathobacter:101186	101186	0.127622	0.0559873	0.0346063	0.031423	0.0304664	0.028249	0.0277021	0.0245308	0.0243373	0.0239147	0.0227115	0.0211314	0.0203877	0.0202333	0.0200856	0.0187649	0.0183293	0.0177326	0.0171206	0.0167814	0.408839	0.602117	64
d__Bacteria	Firmicutes_A	c__Clostridia	o__Peptostreptococcales	f__Anaerovoracaceae	g__	s__	f__Anaerovoracaceae	f__Anaerovoracaceae:101191	101191	0.0303232	0.0190883	0.00978225	0.00856482	0.00746254	0.00703082	0.00614719	0.00548648	0.00520038	0.00498254	0.00486075	0.004729	0.00435943	0.00416705	0.00407565	0.00403561	0.00373979	0.0036759	0.00360977	0.00334575	0.104069	0.144667	673
d__Bacteria	Firmicutes_A	c__Clostridia	o__Oscillospirales	f__DTU089	g__Eubacterium_R	s__	g__Eubacterium_R	g__Eubacterium_R:101230	101230	0.135201	0.0701512	0.0686208	0.0589481	0.0514972	0.0454289	0.0433996	0.0398581	0.0372831	0.0361053	0.0357889	0.0346128	0.033807	0.031276	0.0303581	0.0281718	0.0266657	0.0244528	0.0228778	0.0220353	0.586494	0.87654	34
d__Bacteria	Firmicutes_A	c__Clostridia	o__Oscillospirales	f__DTU089	g__	s__	f__DTU089	f__DTU089:101244	101244	0.0148274	0.00713328	0.0039797	0.00320144	0.00279384	0.00251032	0.00250275	0.0023531	0.0021219	0.00198468	0.00193712	0.00176671	0.00173851	0.00171263	0.00166247	0.00159221	0.00155675	0.00154929	0.00149408	0.00145787	0.0434084	0.059876	2267
d__Bacteria	Firmicutes_A	c__Clostridia	o__Lachnospirales	f__Lachnospiraceae	g__Clostridium_M	s__	g__Clostridium_M	g__Clostridium_M:101246	101246	0.0151897	0.0122415	0.00454031	0.00424909	0.0039513	0.00365673	0.00340384	0.00329789	0.00320522	0.0030031	0.00291725	0.00275193	0.00270577	0.00254478	0.00251104	0.00247454	0.00244817	0.00234532	0.00229782	0.00227892	0.0567387	0.0820142	878
d__Bacteria	Firmicutes_A	c__Clostridia	o__Oscillospirales	f__Ruminococcaceae	g__Faecalibacterium	s__Faecalibacterium prausnitzii_F	s__Faecalibacterium prausnitzii_F	s__Faecalibacterium prausnitzii_F:101255	101255	0.00562051	0.00538922	0.00480574	0.00393295	0.0031715	0.00285735	0.00250526	0.00245183	0.0021117	0.00203576	0.00193621	0.00179804	0.0015764	0.00154699	0.00150632	0.001439	0.00139073	0.00136122	0.00130975	0.00119533	0.0348818	0.0499418	2194
d__Bacteria	Proteobacteria	c__Gammaproteobacteria	o__Betaproteobacteriales	f__Burkholderiaceae	g__Parasutterella	s__Parasutterella excrementihominis	s__Parasutterella excrementihominis	s__Parasutterella excrementihominis:101294	101294	0.0422228	0.0285565	0.0263249	0.0145714	0.0120006	0.0115946	0.0102054	0.00741849	0.00638131	0.00498463	0.00380051	0.00352702	0.00316986	0.00287108	0.00277099	0.0026485	0.00237955	0.00223173	0.00202398	0.00196615	0.164261	0.19165	1356
d__Bacteria	Firmicutes_A	c__Clostridia	o__Oscillospirales	f__Ruminococcaceae	g__Faecalibacterium	s__Faecalibacterium prausnitzii_A	s__Faecalibacterium prausnitzii_A	s__Faecalibacterium prausnitzii_A:101300	101300	0.0048291	0.00110665	0.0006064	0.00056113	0.00047344	0.00044366	0.0004042	0.00039822	0.00037152	0.00036785	0.00034971	0.00033152	0.00032722	0.00031254	0.00030692	0.00030436	0.0002991	0.00029136	0.00028918	0.0002863	0.00956217	0.0126604	5685
d__Bacteria	Bacteroidota	c__Bacteroidia	o__Bacteroidales	f__Rikenellaceae	g__Alistipes	s__Alistipes putredinis	s__Alistipes putredinis	s__Alistipes putredinis:101302	101302	0.00192516	0.00120727	0.00063553	0.00061358	0.00050646	0.00048804	0.000458	0.00029301	0.000254	0.00023095	0.0002137	0.00020105	0.00019358	0.00018395	0.0001798	0.00017797	0.00017255	0.00016729	0.00016169	0.00015723	0.00661199	0.0084208	9206
d__Bacteria	Firmicutes_A	c__Clostridia	o__Lachnospirales	f__Lachnospiraceae	g__Dorea	s__Dorea scindens	s__Dorea scindens	s__Dorea scindens:101303	101303	0.192435	0.060896	0.044769	0.0348439	0.0291215	0.0225832	0.0198189	0.01762	0.0151658	0.0141162	0.013479	0.0130141	0.0125779	0.0122766	0.0116213	0.011448	0.0108167	0.0107534	0.0103393	0.0102258	0.45137	0.567922	94
d__Bacteria	Firmicutes	c__Bacilli	o__Erysipelotrichales	f__Erysipelatoclostridiaceae	g__Erysipelatoclostridium	s__Erysipelatoclostridium spiroforme	s__Erysipelatoclostridium spiroforme	s__Erysipelatoclostridium spiroforme:101304	101304	0.230798	0.053456	0.035792	0.0329217	0.0309343	0.0279286	0.0273469	0.0263883	0.0244062	0.0232446	0.0226353	0.0219407	0.021419	0.0207666	0.0200891	0.0195757	0.0188752	0.0183539	0.018033	0.0174391	0.513217	0.712344	53
d__Bacteria	Bacteroidota	c__Bacteroidia	o__Bacteroidales	f__Bacteroidaceae	g__Bacteroides_A	s__Bacteroides_A coprocola	s__Bacteroides_A coprocola	s__Bacteroides_A coprocola:101306	101306	0.0251715	0.0227489	0.01184	0.00991791	0.00547463	0.00506039	0.00471275	0.00322217	0.00309548	0.00296841	0.00264658	0.00229276	0.00221726	0.0020066	0.00189914	0.0018448	0.00178444	0.00174694	0.00171382	0.00167223	0.094212	0.114037	1348
d__Bacteria	Firmicutes_A	c__Clostridia	o__Lachnospirales	f__Lachnospiraceae	g__Ruminococcus_B	s__Ruminococcus_B lactaris	s__Ruminococcus_B lactaris	s__Ruminococcus_B lactaris:101310	101310	0.00882734	0.00610724	0.00558521	0.00473791	0.00440887	0.00419113	0.0036677	0.00354538	0.00263658	0.0025366	0.00246298	0.00235287	0.00224585	0.00219366	0.00212036	0.0019842	0.00192424	0.0018884	0.00182301	0.00180106	0.046244	0.0670406	3076
d__Bacteria	Bacteroidota	c__Bacteroidia	o__Bacteroidales	f__Bacteroidaceae	g__Bacteroides	s__Bacteroides eggerthii	s__Bacteroides eggerthii	s__Bacteroides eggerthii:101313	101313	0.0206265	0.0172581	0.0100842	0.00761006	0.00535525	0.00495456	0.00456783	0.003988	0.00369345	0.0030524	0.00253091	0.00211699	0.00192842	0.00185185	0.00180935	0.0016829	0.0013741	0.00130301	0.00126869	0.00121878	0.0811904	0.0982754	2624
d__Bacteria	Firmicutes_A	c__Clostridia	o__Lachnospirales	f__Lachnospiraceae	g__Coprococcus_B	s__Coprococcus_B comes	s__Coprococcus_B comes	s__Coprococcus_B comes:101315	101315	0.00577039	0.00454533	0.00386374	0.00285941	0.00199075	0.00197094	0.0018489	0.0016562	0.00148219	0.0013437	0.00120213	0.00108421	0.00103219	0.001003	0.00090688	0.00087544	0.00081511	0.00078881	0.00076326	0.00074088	0.0273315	0.0365434	4358
d__Bacteria	Firmicutes_C	c__Negativicutes	o__Selenomonadales	f__Selenomonadaceae	g__Mitsuokella	s__Mitsuokella multacida	s__Mitsuokella multacida	s__Mitsuokella multacida:101316	101316	0.212126	0.150569	0.102687	0.074263	0.0441556	0.0403121	0.0392636	0.0264977	0.0160743	0.0144159	0.0141058	0.0139058	0.0107228	0.0103835	0.00955679	0.0085469	0.00801109	0.00763999	0.00731676	0.00657863	0.720364	0.817132	75
d__Bacteria	Firmicutes_A	c__Clostridia	o__Lachnospirales	f__Lachnospiraceae	g__Butyrivibrio_A	s__Butyrivibrio_A crossotus	s__Butyrivibrio_A crossotus	s__Butyrivibrio_A crossotus:101319	101319	0.0183283	0.00983945	0.00665667	0.00525232	0.0046953	0.00421497	0.00335722	0.00299918	0.00275085	0.00248414	0.00225665	0.00224716	0.00216661	0.00190342	0.0018504	0.00182223	0.00175889	0.00170183	0.00163794	0.00157156	0.0605784	0.0794951	1696
d__Bacteria	Desulfobacterota	c__Desulfovibrionia	o__Desulfovibrionales	f__Desulfovibrionaceae	g__Desulfovibrio	s__Desulfovibrio piger	s__Desulfovibrio piger	s__Desulfovibrio piger:101321	101321	0.0188976	0.0103605	0.00797917	0.00508831	0.0046255	0.00407218	0.00334118	0.00296408	0.0025172	0.00244945	0.00205485	0.00191173	0.00152906	0.00138085	0.00127935	0.00121416	0.00113532	0.00103972	0.00101397	0.0009858	0.0622951	0.0758399	2938
d__Bacteria	Firmicutes	c__Bacilli	o__Lactobacillales	f__Lactobacillaceae	g__Lactobacillus_B	s__Lactobacillus_B ruminis	s__Lactobacillus_B ruminis	s__Lactobacillus_B ruminis:101334	101334	0.0745453	0.0590355	0.0429015	0.0403597	0.038037	0.0320811	0.029474	0.0263848	0.0239879	0.0228756	0.0225686	0.0220224	0.0197877	0.0186255	0.0178565	0.0167031	0.0163049	0.0154617	0.015089	0.0146473	0.389682	0.568749	86
d__Bacteria	Bacteroidota	c__Bacteroidia	o__Bacteroidales	f__Bacteroidaceae	g__Bacteroides	s__Bacteroides fragilis	s__Bacteroides fragilis	s__Bacteroides fragilis:101337	101337	0.01183	0.00707287	0.00624689	0.00588961	0.00544381	0.00432583	0.00390974	0.00358127	0.00317039	0.00285607	0.00264376	0.0024897	0.00243503	0.00230049	0.00224906	0.00220513	0.00213928	0.00203748	0.00186261	0.00182312	0.0543265	0.0765122	3095
d__Bacteria	Firmicutes	c__Bacilli	o__Lactobacillales	f__Streptococcaceae	g__Streptococcus	s__Streptococcus gordonii	s__Streptococcus gordonii	s__Streptococcus gordonii:101342	101342	0.0594814	0.0276352	0.0263383	0.0231782	0.0213621	0.0202343	0.0187043	0.0183708	0.0177904	0.017139	0.0170124	0.0162639	0.0158329	0.0155388	0.0151857	0.0148373	0.0144931	0.0141972	0.0139289	0.0137758	0.250234	0.4013	107
d__Bacteria	Bacteroidota	c__Bacteroidia	o__Bacteroidales	f__Bacteroidaceae	g__Bacteroides	s__Bacteroides xylanisolvens	s__Bacteroides xylanisolvens	s__Bacteroides xylanisolvens:101345	101345	0.00918379	0.00533258	0.00497507	0.00278609	0.00215115	0.001783	0.00157322	0.00152193	0.00142893	0.00137452	0.00128121	0.0012506	0.0011458	0.00111446	0.00109402	0.00105501	0.00103179	0.00098056	0.0009726	0.00092987	0.0321103	0.0429662	2212
d__Bacteria	Bacteroidota	c__Bacteroidia	o__Bacteroidales	f__Bacteroidaceae	g__Bacteroides	s__Bacteroides uniformis	s__Bacteroides uniformis	s__Bacteroides uniformis:101346	101346	0.00598965	0.00461964	0.00299194	0.00288427	0.00246237	0.00183893	0.00163224	0.00149535	0.00140597	0.00127842	0.00122673	0.00112286	0.00106692	0.00099052	0.00097825	0.00094057	0.00087565	0.0008316	0.00079305	0.00073642	0.0265988	0.0361613	10471
d__Bacteria	Firmicutes_C	c__Negativicutes	o__Veillonellales	f__Veillonellaceae	g__Veillonella	s__Veillonella parvula	s__Veillonella parvula	s__Veillonella parvula:101349	101349	0.0688378	0.0222012	0.0193383	0.016465	0.0155916	0.0153109	0.0143471	0.0134368	0.0132007	0.0128298	0.0124397	0.0121097	0.0120413	0.0119126	0.0115453	0.0114528	0.0112252	0.0110412	0.0109476	0.010388	0.211559	0.326662	142
d__Bacteria	Actinobacteriota	c__Actinobacteria	o__Actinomycetales	f__Bifidobacteriaceae	g__Bifidobacterium	s__Bifidobacterium dentium	s__Bifidobacterium dentium	s__Bifidobacterium dentium:101354	101354	0.156052	0.124605	0.0684377	0.0335666	0.0309249	0.028197	0.0255858	0.0228666	0.0207943	0.0165922	0.0158721	0.0153576	0.0144349	0.0138948	0.0134171	0.0132929	0.0127791	0.0124851	0.0115181	0.0108809	0.527622	0.661554	75
d__Bacteria	Firmicutes_A	c__Clostridia	o__Oscillospirales	f__Oscillospiraceae	g__Clostridium_AJ	s__GCF_000177015.3	s__GCF_000177015.3	s__GCF_000177015.3:101356	101356	0.00185736	0.00098655	0.00084356	0.00062598	0.00054646	0.00051788	0.00040204	0.00038438	0.00037157	0.00034132	0.00029321	0.00029105	0.00028244	0.00027179	0.00026231	0.00025279	0.00024585	0.00024301	0.00023888	0.00023753	0.0068771	0.00949596	6699
d__Bacteria	Desulfobacterota	c__Desulfovibrionia	o__Desulfovibrionales	f__Desulfovibrionaceae	g__Bilophila	s__Bilophila wadsworthia	s__Bilophila wadsworthia	s__Bilophila wadsworthia:101359	101359	0.00482086	0.00237453	0.00203129	0.00172627	0.00146659	0.00129732	0.0011999	0.00112431	0.00105235	0.00095231	0.00092487	0.00082312	0.00078071	0.00073522	0.00072199	0.0007085	0.00068696	0.00059273	0.0005047	0.00048627	0.0180457	0.0250108	8379
d__Bacteria	Proteobacteria	c__Gammaproteobacteria	o__Betaproteobacteriales	f__Burkholderiaceae	g__Sutterella	s__Sutterella wadsworthensis	s__Sutterella wadsworthensis	s__Sutterella wadsworthensis:101361	101361	0.0155473	0.00999974	0.00669013	0.00458951	0.00412466	0.00340021	0.0023837	0.00177787	0.00164404	0.00150206	0.00139482	0.00115565	0.00103078	0.00098669	0.00094162	0.00092534	0.00084639	0.00080018	0.00067882	0.00064685	0.0516592	0.0610663	4659
d__Bacteria	Firmicutes	c__Bacilli	o__Lactobacillales	f__Streptococcaceae	g__Streptococcus	s__Streptococcus anginosus	s__Streptococcus anginosus	s__Streptococcus anginosus:101362	101362	0.181712	0.111813	0.0587879	0.0500213	0.0410021	0.037387	0.0344184	0.0321422	0.0304851	0.0294411	0.0274887	0.026139	0.0238101	0.0231445	0.0220583	0.0213769	0.0204447	0.0199732	0.0180335	0.0171591	0.60721	0.826838	40
d__Bacteria	Firmicutes_A	c__Clostridia	o__Lachnospirales	f__Lachnospiraceae	g__Ruminococcus_B	s__Ruminococcus_B torques	s__Ruminococcus_B torques	s__Ruminococcus_B torques:101374	101374	0.0245302	0.0123519	0.00898095	0.00837922	0.00744592	0.00647233	0.00638961	0.00594969	0.00516225	0.00505008	0.00467744	0.00455074	0.00426817	0.00414859	0.00397483	0.00382557	0.00359358	0.00355746	0.00345918	0.00331562	0.0907121	0.130083	797
d__Bacteria	Firmicutes_A	c__Clostridia	o__Oscillospirales	f__Ruminococcaceae	g__Ruminococcus_F	s__Ruminococcus_F champanellensis	s__Ruminococcus_F champanellensis	s__Ruminococcus_F champanellensis:101375	101375	0.111964	0.0750687	0.0709724	0.0540614	0.040708	0.0315696	0.0293601	0.0249656	0.0215705	0.0192927	0.0184605	0.0175663	0.0158677	0.0150963	0.0149791	0.0142903	0.0133796	0.0128437	0.012326	0.0119376	0.479533	0.62628	99
d__Bacteria	Firmicutes_A	c__Clostridia	o__Lachnospirales	f__Lachnospiraceae	g__Ruminococcus_B	s__Ruminococcus_B glycyrrhizinilyticum	s__Ruminococcus_B glycyrrhizinilyticum	s__Ruminococcus_B glycyrrhizinilyticum:101379	101379	0.061184	0.0455873	0.0381621	0.0283124	0.0254455	0.0222528	0.0215464	0.0205468	0.0194	0.0180583	0.0171764	0.0167889	0.0161427	0.0156771	0.015253	0.0145694	0.0142536	0.0135196	0.0131833	0.01302	0.300496	0.45008	101
d__Bacteria	Firmicutes_A	c__Clostridia	o__Lachnospirales	f__Lachnospiraceae	g__Ruminococcus_B	s__Ruminococcus_B gnavus	s__Ruminococcus_B gnavus	s__Ruminococcus_B gnavus:101380	101380	0.0391204	0.018861	0.00652122	0.00581609	0.0057284	0.00420754	0.00383021	0.00372292	0.0036796	0.00356812	0.00351132	0.00330434	0.00326202	0.00308375	0.00288711	0.00279208	0.00278395	0.00265702	0.00263127	0.00257631	0.0950554	0.124545	609
d__Bacteria	Bacteroidota	c__Bacteroidia	o__Bacteroidales	f__Rikenellaceae	g__Alistipes_A	s__Alistipes_A indistinctus	s__Alistipes_A indistinctus	s__Alistipes_A indistinctus:101385	101385	0.017407	0.00886972	0.00637264	0.00549598	0.00413415	0.00353796	0.00241291	0.00204407	0.00174182	0.00163507	0.00159529	0.00155151	0.00148102	0.00142022	0.00128844	0.00112943	0.00109492	0.0010021	0.00099578	0.00095925	0.0536513	0.0661693	5555
d__Bacteria	Firmicutes_A	c__Clostridia	o__Lachnospirales	f__Lachnospiraceae	g__Clostridium_M	s__Clostridium_M clostridioformis	s__Clostridium_M clostridioformis	s__Clostridium_M clostridioformis:101386	101386	0.229989	0.0662673	0.042834	0.0226634	0.0197897	0.017837	0.0155472	0.0146535	0.0140711	0.0138158	0.0131446	0.0121608	0.0118096	0.0115278	0.0108645	0.0107317	0.0106125	0.010433	0.0102362	0.00988178	0.457468	0.56887	98
d__Bacteria	Actinobacteriota	c__Coriobacteriia	o__Coriobacteriales	f__Eggerthellaceae	g__Senegalimassilia	s__Senegalimassilia anaerobia	s__Senegalimassilia anaerobia	s__Senegalimassilia anaerobia:101387	101387	0.00658425	0.00367443	0.00223231	0.00190353	0.00154215	0.00148775	0.00119682	0.00097781	0.0008995	0.00082404	0.00073291	0.00069895	0.00065723	0.00060715	0.00056809	0.00053765	0.00051499	0.00050021	0.00049086	0.00048483	0.0213226	0.0271155	3575
d__Bacteria	Bacteroidota	c__Bacteroidia	o__Bacteroidales	f__Coprobacteraceae	g__Coprobacter	s__Coprobacter fastidiosus	s__Coprobacter fastidiosus	s__Coprobacter fastidiosus:101391	101391	0.0171304	0.00870113	0.0065075	0.00511205	0.00473195	0.00404437	0.00330004	0.00264608	0.00219188	0.00215405	0.00208814	0.00202101	0.00192441	0.00187952	0.00158625	0.00154214	0.00145992	0.00140976	0.00136167	0.00123619	0.0565195	0.0730285	3088
d__Bacteria	Firmicutes	c__Bacilli	o__Erysipelotrichales	f__Erysipelotrichaceae	g__Eubacterium_D	s__Eubacterium_D innocuum	s__Eubacterium_D innocuum	s__Eubacterium_D innocuum:101396	101396	0.114821	0.031209	0.02851	0.0221663	0.0174253	0.0128503	0.0116787	0.0111267	0.0103793	0.0101832	0.00985047	0.00952907	0.00931184	0.0092224	0.00899326	0.00872344	0.00861784	0.00848185	0.00834911	0.00824091	0.270349	0.35967	168
d__Bacteria	Firmicutes	c__Bacilli	o__Erysipelotrichales	f__Erysipelatoclostridiaceae	g__Erysipelatoclostridium	s__Erysipelatoclostridium ramosum	s__Erysipelatoclostridium ramosum	s__Erysipelatoclostridium ramosum:101400	101400	0.0272813	0.0260568	0.0233762	0.0226079	0.0210251	0.0196463	0.0182367	0.018152	0.0165674	0.0159378	0.0154702	0.0147906	0.014449	0.0138443	0.0130028	0.0125113	0.0124603	0.0120789	0.0117138	0.0112984	0.208888	0.340507	145
d__Bacteria	Proteobacteria	c__Gammaproteobacteria	o__Betaproteobacteriales	f__Burkholderiaceae	g__Sutterella	s__Sutterella sp3	s__Sutterella sp3	s__Sutterella sp3:101410	101410	0.0095382	0.00588782	0.0044868	0.00336001	0.00288134	0.00268573	0.00245145	0.00235589	0.00194741	0.00192959	0.00187335	0.00180574	0.00164259	0.0015608	0.00150355	0.00146862	0.00146441	0.00138339	0.00137493	0.00135068	0.0375242	0.0529523	4352
d__Bacteria	Bacteroidota	c__Bacteroidia	o__Bacteroidales	f__Rikenellaceae	g__Alistipes	s__Alistipes obesi	s__Alistipes obesi	s__Alistipes obesi:101415	101415	0.0145736	0.012836	0.0054069	0.00492969	0.00461608	0.00419036	0.00346011	0.0025613	0.00202664	0.0018414	0.00134451	0.00131366	0.00126021	0.0011962	0.00097238	0.00093325	0.00087929	0.00081712	0.00079905	0.00076148	0.0564421	0.0667193	8709
d__Bacteria	Bacteroidota	c__Bacteroidia	o__Bacteroidales	f__Rikenellaceae	g__Alistipes	s__Alistipes senegalensis	s__Alistipes senegalensis	s__Alistipes senegalensis:101420	101420	0.0124101	0.00897898	0.00521715	0.00418567	0.0034682	0.0029	0.00212957	0.00191079	0.00144176	0.00121102	0.00111972	0.00104388	0.00103818	0.00099941	0.00098546	0.00097504	0.00094038	0.00083924	0.00074275	0.00068496	0.0438532	0.0532222	5928
d__Bacteria	Bacteroidota	c__Bacteroidia	o__Bacteroidales	f__Rikenellaceae	g__Alistipes_A	s__Alistipes_A ihumii	s__Alistipes_A ihumii	s__Alistipes_A ihumii:101429	101429	0.0115601	0.00911703	0.00643707	0.00551356	0.00296804	0.00274204	0.00264211	0.00245295	0.00205196	0.00199945	0.00173984	0.00159666	0.00149501	0.001389	0.00127342	0.00114156	0.00105499	0.00083883	0.00077269	0.00071903	0.0474843	0.0595053	6403
d__Bacteria	Bacteroidota	c__Bacteroidia	o__Bacteroidales	f__Bacteroidaceae	g__Bacteroides	s__Bacteroides salyersiae	s__Bacteroides salyersiae	s__Bacteroides salyersiae:101433	101433	0.050188	0.0329376	0.0202145	0.0157288	0.0111658	0.0097693	0.00720323	0.00659264	0.0062633	0.00565299	0.00486361	0.00431399	0.00309499	0.00301265	0.0026752	0.00262433	0.00240548	0.0021334	0.00203276	0.00190388	0.165716	0.194776	1351
d__Bacteria	Firmicutes_A	c__Clostridia	o__Lachnospirales	f__Lachnospiraceae	g__Tyzzerella	s__Tyzzerella sp1	s__Tyzzerella sp1	s__Tyzzerella sp1:101439	101439	0.0857403	0.0512106	0.0315184	0.0283234	0.0200869	0.0186745	0.0181549	0.0174536	0.0162635	0.0159584	0.0148787	0.0143007	0.013861	0.0129609	0.0123127	0.012167	0.0116378	0.0114251	0.0111228	0.0109001	0.303384	0.428951	135
d__Bacteria	Firmicutes_C	c__Negativicutes	o__Veillonellales	f__Veillonellaceae	g__Veillonella	s__Veillonella atypica	s__Veillonella atypica	s__Veillonella atypica:101444	101444	0.0210668	0.0183697	0.0179274	0.0171637	0.0170534	0.0158174	0.015535	0.0148173	0.014714	0.0142686	0.0137976	0.0136268	0.0133612	0.0127464	0.0125886	0.0123635	0.0118868	0.0118215	0.0117988	0.011585	0.166733	0.292309	118
d__Bacteria	Firmicutes	c__Bacilli	o__Erysipelotrichales	f__Erysipelotrichaceae	g__Faecalitalea	s__Faecalitalea cylindroides	s__Faecalitalea cylindroides	s__Faecalitalea cylindroides:101455	101455	0.0173891	0.0154854	0.0109196	0.00962958	0.00961832	0.00880034	0.00865808	0.00858388	0.00850772	0.00827748	0.00820756	0.00799645	0.007882	0.00776594	0.00773656	0.00748823	0.00738717	0.0073318	0.00732317	0.00721969	0.105869	0.182208	248
d__Bacteria	Firmicutes_A	c__Clostridia	o__Lachnospirales	f__Lachnospiraceae	g__Eubacterium_I	s__Eubacterium_I ramulus	s__Eubacterium_I ramulus	s__Eubacterium_I ramulus:101456	101456	0.00319205	0.00196828	0.00148305	0.00135412	0.00128671	0.00121878	0.00120189	0.001161	0.00113746	0.00102657	0.00095781	0.00089105	0.00084794	0.00084262	0.00081347	0.00079863	0.00079688	0.00077202	0.00076118	0.00075179	0.0150299	0.0232633	3060
d__Bacteria	Bacteroidota	c__Bacteroidia	o__Bacteroidales	f__Tannerellaceae	g__Parabacteroides	s__Parabacteroides goldsteinii	s__Parabacteroides goldsteinii	s__Parabacteroides goldsteinii:101489	101489	0.0228259	0.0153633	0.0106136	0.00888386	0.00615221	0.0054831	0.00528696	0.00501663	0.00427688	0.00398388	0.00393412	0.003741	0.00347274	0.00330128	0.00312651	0.00304242	0.00295052	0.00278683	0.00270762	0.0025741	0.0878863	0.119523	1322
d__Bacteria	Actinobacteriota	c__Actinobacteria	o__Actinomycetales	f__Bifidobacteriaceae	g__Bifidobacterium	s__Bifidobacterium catenulatum	s__Bifidobacterium catenulatum	s__Bifidobacterium catenulatum:101490	101490	0.0238683	0.015145	0.0140805	0.0124423	0.0103116	0.00903871	0.00868946	0.00817808	0.00797581	0.0075419	0.00705913	0.00689954	0.00640969	0.00622794	0.00615153	0.00593823	0.00577863	0.00556732	0.00550875	0.00520422	0.117272	0.178017	591
d__Bacteria	Firmicutes_A	c__Clostridia	o__Lachnospirales	f__Lachnospiraceae	g__Clostridium_M	s__Clostridium_M bolteae	s__Clostridium_M bolteae	s__Clostridium_M bolteae:101493	101493	0.112905	0.045272	0.0359952	0.0308656	0.0223874	0.0212813	0.0158625	0.0151251	0.013946	0.0135105	0.0130992	0.0122202	0.0119185	0.0116726	0.0113472	0.0108051	0.0106859	0.0104695	0.0102685	0.0101513	0.327151	0.439789	128
d__Bacteria	Firmicutes_A	c__Clostridia	o__Oscillospirales	f__Oscillospiraceae	g__Clostridium_AJ	s__Clostridium_AJ phoceensis	s__Clostridium_AJ phoceensis	s__Clostridium_AJ phoceensis:101500	101500	0.00830704	0.00638278	0.00563189	0.00410724	0.00371727	0.0034415	0.00212479	0.00173156	0.00155893	0.00149643	0.00118579	0.0010726	0.00077046	0.00069744	0.00065964	0.0006275	0.0005037	0.00047468	0.00046088	0.0004346	0.0384994	0.0453867	9817
d__Bacteria	Firmicutes_A	c__Clostridia	o__Lachnospirales	f__Lachnospiraceae	g__Clostridium_M	s__GCF_001517625.2	s__GCF_001517625.2	s__GCF_001517625.2:101531	101531	0.0568159	0.0516971	0.0396052	0.034187	0.0275458	0.0241719	0.0225686	0.021222	0.0209042	0.0208611	0.0200605	0.0183251	0.0179146	0.0175328	0.0168294	0.0166081	0.0161287	0.015696	0.0148571	0.0144337	0.319579	0.487965	91
d__Bacteria	Firmicutes_A	c__Clostridia	o__Oscillospirales	f__Oscillospiraceae	g__CAG-103	s__	g__CAG-103	g__CAG-103:101565	101565	0.0209404	0.00903011	0.00463048	0.00420993	0.00230874	0.00193423	0.00158101	0.00154298	0.00148311	0.00144426	0.0012594	0.00121994	0.00104757	0.00099011	0.00096057	0.0009567	0.00093124	0.00091205	0.00086604	0.00085218	0.0491053	0.0591011	2389
d__Bacteria	Firmicutes_A	c__Clostridia	o__Oscillospirales	f__Ruminococcaceae	g__Subdoligranulum	s__	g__Subdoligranulum	g__Subdoligranulum:101627	101627	0.00704471	0.00309405	0.00276733	0.00127805	0.00115502	0.00086186	0.00078318	0.0005983	0.00056581	0.00053356	0.00050547	0.00046585	0.00045345	0.00040609	0.0003951	0.00037076	0.00036272	0.0003607	0.00035311	0.00034217	0.0186819	0.0226973	8124
d__Bacteria	Bacteroidota	c__Bacteroidia	o__Bacteroidales	f__UBA932	g__RC9	s__GCA_000435075.1	s__GCA_000435075.1	s__GCA_000435075.1:101633	101633	0.100006	0.0787835	0.0272519	0.0251432	0.0237518	0.0227395	0.0225532	0.0222089	0.0220222	0.0217197	0.0210109	0.0209021	0.0205617	0.0202844	0.0200962	0.0200448	0.0196247	0.0192829	0.0191498	0.0189899	0.36618	0.566128	49
d__Bacteria	Firmicutes_A	c__Clostridia	o__Lachnospirales	f__Lachnospiraceae	g__Agathobacter	s__	g__Agathobacter	g__Agathobacter:101637	101637	0.196444	0.118713	0.0900109	0.0505504	0.0373798	0.0347877	0.0305231	0.0284963	0.0265732	0.0251242	0.0247436	0.0229565	0.0223228	0.0213425	0.0197303	0.0191421	0.0189447	0.0175506	0.0172396	0.0170132	0.638602	0.839588	37
d__Bacteria	Bacteroidota	c__Bacteroidia	o__Bacteroidales	f__Marinifilaceae	g__Butyricimonas	s__	g__Butyricimonas	g__Butyricimonas:101655	101655	0.813425	0.013927	0.0111831	0.00862783	0.0078279	0.00696956	0.00554953	0.00497579	0.00468015	0.00454029	0.00442099	0.00435954	0.00402237	0.00391419	0.00386863	0.00371761	0.00367557	0.00361771	0.00357084	0.00353553	0.881706	0.920409	50
d__Bacteria	Firmicutes_A	c__Clostridia	o__Lachnospirales	f__Lachnospiraceae	g__Blautia	s__Blautia hansenii	s__Blautia hansenii	s__Blautia hansenii:101704	101704	0.130054	0.11092	0.0305093	0.0260316	0.0234775	0.020397	0.0189145	0.0178702	0.0171246	0.0167847	0.015949	0.0149131	0.0141288	0.0137901	0.0134395	0.0131775	0.0127984	0.012282	0.0120409	0.0118389	0.412083	0.546442	87
d__Bacteria	Firmicutes	c__Bacilli	o__Erysipelotrichales	f__Erysipelotrichaceae	g__Holdemanella	s__Holdemanella biformis	s__Holdemanella biformis	s__Holdemanella biformis:101711	101711	0.0535586	0.0366665	0.0221355	0.0169128	0.0105384	0.00880296	0.00820354	0.00738016	0.00667465	0.00630975	0.00587219	0.00545283	0.0052499	0.00501155	0.00481725	0.00455023	0.00443625	0.0043532	0.00415878	0.00396933	0.177183	0.225054	476
d__Bacteria	Firmicutes_A	c__Clostridia	o__Lachnospirales	f__Lachnospiraceae	g__Coprococcus_A	s__Coprococcus_A catus	s__Coprococcus_A catus	s__Coprococcus_A catus:101714	101714	0.00293481	0.00120011	0.00098074	0.00092806	0.00090732	0.00073636	0.00055672	0.00052538	0.00048938	0.00046727	0.00045105	0.00044379	0.00043177	0.000418	0.00041406	0.00040888	0.00039476	0.00039247	0.00037881	0.00036677	0.00972616	0.0138265	4824
d__Bacteria	Firmicutes_A	c__Clostridia	o__Oscillospirales	f__DTU089	g__Eubacterium_R	s__GCA_000434995.1	s__GCA_000434995.1	s__GCA_000434995.1:101737	101737	0.0342657	0.0172958	0.0129904	0.00898368	0.00772894	0.00714962	0.00671669	0.00579174	0.00546218	0.00486009	0.00475973	0.00437179	0.0041511	0.00395416	0.00378407	0.00367082	0.00350854	0.00330721	0.00324748	0.00310263	0.111245	0.149102	532
d__Bacteria	Firmicutes_A	c__Clostridia	o__Oscillospirales	f__Ruminococcaceae	g__Ruminococcus	s__	g__Ruminococcus	g__Ruminococcus:101757	101757	0.0815145	0.0608748	0.0430077	0.0371128	0.0321218	0.0270498	0.0240646	0.0228229	0.0219084	0.0198619	0.0164369	0.0156709	0.0152417	0.0135501	0.0127817	0.0122997	0.011933	0.0113305	0.0107048	0.00946877	0.370339	0.499757	139
d__Bacteria	Bacteroidota	c__Bacteroidia	o__Bacteroidales	f__Bacteroidaceae	g__Prevotella	s__GCA_000434975.1	s__GCA_000434975.1	s__GCA_000434975.1:101763	101763	0.113286	0.0200082	0.0162899	0.0152234	0.013972	0.0133424	0.0129359	0.0126651	0.0125093	0.0121018	0.0116037	0.0114977	0.0113802	0.0113511	0.0112285	0.0110637	0.0109047	0.010824	0.0107733	0.010668	0.242334	0.353628	96
d__Bacteria	Bacteroidota	c__Bacteroidia	o__Bacteroidales	f__Bacteroidaceae	g__Prevotella	s__Prevotella sp13	s__Prevotella sp13	s__Prevotella sp13:101770	101770	0.00794929	0.00460304	0.00181265	0.00153509	0.00147744	0.00140004	0.0013766	0.00130108	0.00125896	0.00125408	0.00122154	0.00120209	0.00119097	0.00118436	0.00117604	0.00116073	0.00115188	0.00114708	0.00114086	0.00113441	0.0239683	0.0356782	1114
d__Bacteria	Bacteroidota	c__Bacteroidia	o__Bacteroidales	f__Rikenellaceae	g__Alistipes	s__Alistipes finegoldii	s__Alistipes finegoldii	s__Alistipes finegoldii:101830	101830	0.0140351	0.00585113	0.00263189	0.00202481	0.0019151	0.0017664	0.00157658	0.00127143	0.0011483	0.00108663	0.00092234	0.00083078	0.00081177	0.00075216	0.00072017	0.00060727	0.00059389	0.00057544	0.00054404	0.00052866	0.0333073	0.0401938	6740
d__Bacteria	Firmicutes_A	c__Clostridia	o__Lachnospirales	f__Lachnospiraceae	g__TF01-11	s__GCA_000436755.1	s__GCA_000436755.1	s__GCA_000436755.1:101831	101831	0.0869313	0.0434764	0.0289552	0.0269126	0.0251857	0.0242178	0.0217447	0.0210031	0.0204197	0.0195822	0.0193822	0.018811	0.0181269	0.0170104	0.0166911	0.0163969	0.0160974	0.015545	0.0153273	0.0149362	0.318429	0.486753	83
d__Bacteria	Firmicutes_A	c__Clostridia	o__Lachnospirales	f__Lachnospiraceae	g__Eubacterium_F	s__GCA_000433735.1	s__GCA_000433735.1	s__GCA_000433735.1:101848	101848	0.00888886	0.00241636	0.00230509	0.0017187	0.00165667	0.00144076	0.00139941	0.00123467	0.00118618	0.00117079	0.00105729	0.00104806	0.00101054	0.00097986	0.0009101	0.0008716	0.00083529	0.00082995	0.0008163	0.00080957	0.0234175	0.032586	2553
d__Bacteria	Firmicutes_A	c__Clostridia	o__Lachnospirales	f__Lachnospiraceae	g__CAG-632	s__GCA_000431515.1	s__GCA_000431515.1	s__GCA_000431515.1:101855	101855	0.127293	0.0651045	0.0451929	0.0423683	0.0369317	0.0359992	0.0346291	0.0322173	0.028082	0.0258861	0.0244574	0.0230979	0.023023	0.0215021	0.0210713	0.0201028	0.0194348	0.018777	0.0186885	0.0181074	0.473705	0.681967	53
d__Bacteria	Bacteroidota	c__Bacteroidia	o__Bacteroidales	f__Bacteroidaceae	g__Prevotella	s__	g__Prevotella	g__Prevotella:101866	101866	0.0076178	0.00689796	0.00636786	0.00454774	0.00326258	0.00317612	0.00231436	0.00220814	0.0021799	0.0021044	0.0020474	0.0020016	0.00195285	0.00182534	0.001796	0.00175353	0.00173543	0.00168954	0.00164057	0.00163702	0.0406769	0.0587562	1630
d__Bacteria	Firmicutes_A	c__Clostridia	o__Oscillospirales	f__Oscillospiraceae	g__F23-B02	s__	g__F23-B02	g__F23-B02:101919	101919	0.123352	0.0653128	0.0538156	0.0469313	0.0445839	0.0385256	0.0359321	0.0342909	0.0337445	0.0324517	0.0297415	0.0269544	0.0259284	0.0249771	0.0245543	0.0227851	0.0223535	0.021988	0.0208448	0.0204567	0.50894	0.749524	46
d__Bacteria	Firmicutes_A	c__Clostridia	o__Oscillospirales	f__Ruminococcaceae	g__	s__	f__Ruminococcaceae	f__Ruminococcaceae:101940	101940	0.134344	0.0702769	0.0584606	0.0488087	0.0437664	0.0322614	0.0284265	0.0278397	0.0248722	0.0240752	0.0218064	0.0204454	0.0198054	0.0192306	0.0173856	0.0170725	0.0153966	0.0147685	0.0143912	0.0139434	0.493131	0.667377	73
d__Bacteria	Bacteroidota	c__Bacteroidia	o__Bacteroidales	f__Bacteroidaceae	g__Bacteroides_A	s__GCA_000434735.1	s__GCA_000434735.1	s__GCA_000434735.1:101963	101963	0.104643	0.046204	0.0371705	0.0295224	0.0276222	0.0271274	0.0244598	0.0226077	0.0209281	0.0197937	0.0181038	0.0175377	0.0169619	0.0161631	0.0158083	0.0147116	0.0144793	0.0143513	0.0140972	0.014037	0.360078	0.516329	82
d__Bacteria	Bacteroidota	c__Bacteroidia	o__Bacteroidales	f__Bacteroidaceae	g__Prevotella	s__	g__Prevotella	g__Prevotella:101975	101975	0.227879	0.0510949	0.0301078	0.0278425	0.0260246	0.0238549	0.0230847	0.0221111	0.0220022	0.0214161	0.0205421	0.0192623	0.0190418	0.018621	0.0183235	0.0179344	0.0170561	0.0164041	0.0161177	0.0159139	0.475418	0.654635	60
d__Bacteria	Firmicutes_A	c__Clostridia	o__Oscillospirales	f__DTU089	g__CAG-177	s__GCA_000431775.1	s__GCA_000431775.1	s__GCA_000431775.1:102001	102001	0.164454	0.0561077	0.0424585	0.0297966	0.0243616	0.022666	0.0215485	0.0201736	0.0200773	0.019255	0.0181524	0.01756	0.0164329	0.0156898	0.0148834	0.0145856	0.0144197	0.0139829	0.0139481	0.0135339	0.420899	0.574087	74
d__Bacteria	Bacteroidota	c__Bacteroidia	o__Bacteroidales	f__Rikenellaceae	g__Alistipes	s__	g__Alistipes	g__Alistipes:102007	102007	0.0322334	0.0204494	0.012178	0.00924852	0.00871174	0.00722903	0.00690398	0.00631372	0.00610165	0.00564467	0.00536883	0.00503341	0.00479636	0.00397422	0.00337028	0.00281105	0.00270762	0.00251737	0.00235913	0.00227158	0.115014	0.150224	2505
d__Bacteria	Proteobacteria	c__Alphaproteobacteria	o__RF32	f__CAG-239	g__51-20	s__GCA_001917175.1	s__GCA_001917175.1	s__GCA_001917175.1:102021	102021	0.0457938	0.0277014	0.0150096	0.0133946	0.0113947	0.0112064	0.00930133	0.00881927	0.00777187	0.00609694	0.00506582	0.00446917	0.0039253	0.00275015	0.00256459	0.00241349	0.00209919	0.002008	0.00191348	0.00184194	0.15649	0.185541	2717
d__Bacteria	Firmicutes_A	c__Clostridia	o__Oscillospirales	f__Ruminococcaceae	g__Faecalibacterium	s__	g__Faecalibacterium	g__Faecalibacterium:102040	102040	0.0029847	0.00280364	0.00249528	0.0022381	0.00191553	0.00178924	0.00164067	0.0015623	0.00150218	0.00133716	0.00130498	0.00121859	0.0011869	0.00115648	0.00113311	0.00110779	0.00103823	0.00102218	0.0009546	0.00089555	0.0202688	0.0312872	7823
d__Bacteria	Firmicutes_A	c__Clostridia	o__Oscillospirales	f__Oscillospiraceae	g__Oscillibacter	s__GCA_001916835.1	s__GCA_001916835.1	s__GCA_001916835.1:102057	102057	0.00185081	0.00133532	0.00099527	0.00082643	0.00069639	0.0006083	0.00057627	0.00050753	0.00043231	0.00039538	0.00036684	0.00033563	0.00031496	0.00030462	0.00028446	0.00025059	0.00024428	0.00023904	0.00023678	0.00022842	0.008224	0.0110296	9074
d__Bacteria	Firmicutes_A	c__Clostridia	o__Oscillospirales	f__Oscillospiraceae	g__	s__	f__Oscillospiraceae	f__Oscillospiraceae:102060	102060	0.00716672	0.00231961	0.00201658	0.00146255	0.00123623	0.00103793	0.00098404	0.00095937	0.00092267	0.00090187	0.00083558	0.00078878	0.00076761	0.0007468	0.00073503	0.00071732	0.00067409	0.00067294	0.00063771	0.00062012	0.0190076	0.0262035	8840
d__Bacteria	Firmicutes_A	c__Clostridia	o__Christensenellales	f__CAG-74	g__	s__	f__CAG-74	f__CAG-74:102072	102072	0.00149733	0.00021816	0.0001841	0.00016566	0.0001625	0.00015569	0.0001494	0.00014284	0.00013423	0.00013266	0.00013124	0.00012845	0.00012499	0.00012468	0.00012424	0.00012381	0.00012331	0.00012284	0.00012229	0.00012185	0.00294257	0.00419026	8806
d__Bacteria	Proteobacteria	c__Gammaproteobacteria	o__Betaproteobacteriales	f__Burkholderiaceae	g__Sutterella	s__	g__Sutterella	g__Sutterella:102101	102101	0.0182008	0.0135866	0.0092278	0.00644794	0.0040258	0.00280528	0.00244234	0.00202665	0.00184205	0.00164721	0.00144552	0.00142782	0.00140669	0.00134679	0.00124411	0.00122858	0.00114002	0.0010607	0.00103832	0.0010277	0.0622524	0.0746187	1134
d__Bacteria	Bacteroidota	c__Bacteroidia	o__Bacteroidales	f__Bacteroidaceae	g__Prevotella	s__	g__Prevotella	g__Prevotella:102108	102108	0.0343193	0.0225346	0.0222314	0.0158315	0.0144768	0.0140066	0.0137111	0.0125756	0.0119651	0.0118287	0.0111579	0.0110811	0.0108601	0.0106037	0.0104606	0.0103718	0.0103365	0.0102842	0.0102025	0.0101828	0.173481	0.279022	105
d__Bacteria	Firmicutes_C	c__Negativicutes	o__Selenomonadales	f__Selenomonadaceae	g__Anaerovibrio	s__	g__Anaerovibrio	g__Anaerovibrio:102113	102113	0.0820844	0.0598433	0.056564	0.0546245	0.0432798	0.0414519	0.0373349	0.0354386	0.0343066	0.0329559	0.0315001	0.0305381	0.0292715	0.0290113	0.0281808	0.0275823	0.027304	0.0262136	0.0259823	0.0252748	0.477884	0.758743	37
d__Bacteria	Bacteroidota	c__Bacteroidia	o__Bacteroidales	f__Bacteroidaceae	g__Prevotella	s__GCA_000436915.1	s__GCA_000436915.1	s__GCA_000436915.1:102133	102133	0.144158	0.0962073	0.0574298	0.0423721	0.0365851	0.026807	0.0241052	0.0222669	0.0210156	0.0197455	0.0191485	0.017712	0.0172172	0.0162097	0.0152129	0.0150452	0.0144237	0.0139779	0.0137246	0.0135357	0.490692	0.6469	68
d__Bacteria	Firmicutes_A	c__Clostridia	o__Oscillospirales	f__DTU089	g__Anaeromassilibacillus	s__GCF_002159845.1	s__GCF_002159845.1	s__GCF_002159845.1:102135	102135	0.0106109	0.00161552	0.00149116	0.00120631	0.00114702	0.00109841	0.0010581	0.00090905	0.00085498	0.00078466	0.00076289	0.00075693	0.00073456	0.00071417	0.0007077	0.0007022	0.00068874	0.00065031	0.00063944	0.00062975	0.0207761	0.0277628	4495
d__Bacteria	Firmicutes_A	c__Clostridia	o__Oscillospirales	f__Oscillospiraceae	g__CAG-83	s__	g__CAG-83	g__CAG-83:102143	102143	0.00221357	0.00158603	0.00122172	0.00116007	0.00078222	0.00069225	0.00056257	0.00053689	0.00052272	0.00045884	0.00043424	0.00037902	0.00036998	0.00032743	0.00032034	0.00031287	0.00031227	0.00030438	0.00029832	0.00028774	0.00973688	0.0130835	5948
d__Bacteria	Firmicutes_A	c__Clostridia	o__Oscillospirales	f__Ruminococcaceae	g__Ruthenibacterium	s__	g__Ruthenibacterium	g__Ruthenibacterium:102155	102155	0.0192301	0.017225	0.0141887	0.0136465	0.0133053	0.0130581	0.012186	0.011902	0.0115153	0.0112585	0.0108551	0.0104738	0.0101907	0.0100989	0.00995218	0.0098077	0.00958303	0.00937743	0.00936077	0.00916156	0.137515	0.236377	195
d__Archaea	Euryarchaeota	c__Methanobacteria	o__Methanobacteriales	f__Methanobacteriaceae	g__Methanobrevibacter_A	s__GCF_000016525.1	s__GCF_000016525.1	s__GCF_000016525.1:102163	102163	0.0242747	0.0131613	0.00552507	0.0047834	0.00356913	0.00304569	0.00264121	0.00250144	0.00221506	0.00219921	0.00207957	0.00203439	0.00192956	0.00190106	0.00181017	0.00179788	0.00174221	0.00170283	0.00168415	0.00166398	0.0639162	0.0822619	992
d__Bacteria	Firmicutes_A	c__Clostridia	o__Clostridiales	f__Clostridiaceae	g__Clostridium	s__Clostridium sp1	s__Clostridium sp1	s__Clostridium sp1:102190	102190	0.0183915	0.00345016	0.00232787	0.00199527	0.00170217	0.00165989	0.00156183	0.0015041	0.00140221	0.00136574	0.00133604	0.00132137	0.00130634	0.00129273	0.00125243	0.00123822	0.00122425	0.00122209	0.00121654	0.00120415	0.0353608	0.047975	1062
d__Bacteria	Firmicutes	c__Bacilli	o__ML615J-28	f__CAG-313	g__CAG-313	s__GCA_000433035.1	s__GCA_000433035.1	s__GCA_000433035.1:102191	102191	0.0300234	0.0226753	0.0158257	0.0112295	0.00984981	0.00960636	0.00821822	0.00783562	0.00693221	0.0068062	0.00549609	0.00515482	0.00419617	0.00402158	0.0038034	0.00354932	0.00335585	0.00319509	0.00310382	0.00289294	0.129002	0.167771	1729
d__Bacteria	Firmicutes_A	c__Clostridia	o__Oscillospirales	f__Oscillospiraceae	g__	s__	f__Oscillospiraceae	f__Oscillospiraceae:102238	102238	0.0467006	0.0361134	0.0335322	0.0289611	0.0279132	0.0262279	0.0248701	0.0241002	0.0222873	0.0214619	0.0213468	0.0203211	0.0197039	0.0194453	0.0184124	0.017442	0.0173419	0.0166832	0.0164953	0.0164428	0.292168	0.475803	81
d__Bacteria	Spirochaetota	c__Spirochaetia	o__Treponematales	f__Treponemataceae	g__Treponema_D	s__Treponema_D succinifaciens	s__Treponema_D succinifaciens	s__Treponema_D succinifaciens:102242	102242	0.219074	0.0507259	0.0467108	0.0412059	0.0395606	0.0309591	0.0273684	0.0271197	0.0250209	0.0243838	0.0233731	0.0225952	0.021992	0.0212643	0.0204805	0.0203207	0.0194233	0.0190497	0.0187539	0.0180436	0.532129	0.737426	45
d__Bacteria	Firmicutes_A	c__Clostridia	o__Oscillospirales	f__Ruminococcaceae	g__Faecalibacterium	s__Faecalibacterium prausnitzii_D	s__Faecalibacterium prausnitzii_D	s__Faecalibacterium prausnitzii_D:102272	102272	0.00241793	0.00165743	0.00130667	0.00097159	0.00093496	0.00081237	0.00073275	0.00068	0.00065635	0.00064882	0.00061989	0.00060514	0.0005677	0.00054168	0.00051257	0.00050891	0.00049942	0.00048418	0.00048052	0.00047651	0.0108189	0.0161154	9569
d__Bacteria	Firmicutes_A	c__Clostridia	o__Oscillospirales	f__Ruminococcaceae	g__Faecalibacterium	s__GCA_000434595.1	s__GCA_000434595.1	s__GCA_000434595.1:102274	102274	0.00364755	0.00304712	0.00241062	0.00227754	0.00213342	0.001929	0.00176732	0.00153732	0.00138974	0.00130508	0.00128912	0.00118338	0.00116833	0.00109097	0.00107702	0.0010616	0.00095233	0.00089471	0.0008043	0.00072784	0.0214447	0.0316943	8706
[truncated: 176 more rows]

## Sheet: Table S6_LDcohort
Table S6. Genome-wide linkage disequilibrium (LD) levels of 433 gut microbial species in each cohort.
[truncated: 2,088 more rows]

[truncated: 13 more sheets: Table S7_LD, Table S8_DnaIsolation, Table S9_annotationSNV, Table S10_summMWAS, Table S11_metaMWAS, Table S12_singleCohortMWAS, Table S13_enrichRep, Table S14_enrichSingleCohort, Table S15_importance, Table S16_SnvAgePhen, Table S17_SnvAgeMetabolome, Table S18_SnvAgeMetabHighCor, Table S19_mediation]
